# Supplementary material for: Metastatic small cell lung cancer arises from TP53/RB1-deficient and MYC overproduction hESC-derived PNECs
Source: eLife. 2025 Jul 22;13:RP93170. doi: 10.7554/eLife.93170 (PMC12283072; doi:10.7554/eLife.93170)
Supplement: Supplementary file 1. — (a) Differentially expressed transcripts used to identify major cell type clusters in single cell RNA-seq data. (b) Differentially expressed transcripts from neuroendocrine component sub-clustering and groupings. (c) Differentially expressed transcripts used to compare NE and NE-variant sub-clustering. [file elife-93170-supp1.xlsx]

## Sheet: Supplementary File 1a
Supplementary File 1a. Differentially expressed transcripts used to identify major cell type clusters in single cell RNA-seq data
***relates to Figure 4A
gene	gene_name	cluster	p_val	avg_log2FC	p_val_adj	pct.1	pct.2	pct_diff
ENSG00000106541	AGR2	Basal/Suprabasal	0	3.09952	0	0.944	0.034	0.91
ENSG00000089356	FXYD3	Basal/Suprabasal	0	3.59631	0	0.949	0.048	0.901
ENSG00000189143	CLDN4	Basal/Suprabasal	0	2.94559	0	0.978	0.111	0.867
ENSG00000189334	S100A14	Basal/Suprabasal	0	2.11395	0	0.853	0.024	0.829
ENSG00000127324	TSPAN8	Basal/Suprabasal	0	2.67991	0	0.845	0.028	0.817
ENSG00000171345	KRT19	Basal/Suprabasal	0	3.32506	0	0.991	0.193	0.798
ENSG00000164266	SPINK1	Basal/Suprabasal	0	3.33174	0	0.825	0.031	0.794
ENSG00000185633	NDUFA4L2	Basal/Suprabasal	0	2.55265	0	0.912	0.13	0.782
ENSG00000163435	ELF3	Basal/Suprabasal	0	1.845	0	0.846	0.071	0.775
ENSG00000181885	CLDN7	Basal/Suprabasal	0	1.70014	0	0.858	0.093	0.765
ENSG00000102554	KLF5	Basal/Suprabasal	0	1.93482	0	0.862	0.109	0.753
ENSG00000119888	EPCAM	Basal/Suprabasal	0	2.07937	0	0.953	0.217	0.736
ENSG00000183742	MACC1	Basal/Suprabasal	0	1.8108	0	0.79	0.068	0.722
ENSG00000167644	C19orf33	Basal/Suprabasal	0	1.76895	0	0.738	0.029	0.709
ENSG00000078401	EDN1	Basal/Suprabasal	0	2.4524	0	0.731	0.042	0.689
ENSG00000132698	RAB25	Basal/Suprabasal	0	1.33241	0	0.755	0.069	0.686
ENSG00000167642	SPINT2	Basal/Suprabasal	0	1.46285	0	0.905	0.252	0.653
ENSG00000130066	SAT1	Basal/Suprabasal	7.53579e-130	1.6503	2.75727e-125	0.97	0.322	0.648
ENSG00000163586	FABP1	Basal/Suprabasal	0	4.88529	0	0.683	0.04	0.643
ENSG00000039068	CDH1	Basal/Suprabasal	0	1.24735	0	0.72	0.08	0.64
ENSG00000170421	KRT8	Basal/Suprabasal	0	1.74334	0	0.971	0.35	0.621
ENSG00000118271	TTR	Basal/Suprabasal	0	1.79181	0	0.656	0.036	0.62
ENSG00000165215	CLDN3	Basal/Suprabasal	0	1.53453	0	0.806	0.186	0.62
ENSG00000118523	CCN2	Basal/Suprabasal	3.40679e-281	1.98887	1.24651e-276	0.79	0.176	0.614
ENSG00000197747	S100A10	Basal/Suprabasal	2.05425e-291	1.91732	7.51629e-287	0.988	0.382	0.606
ENSG00000233041	PHGR1	Basal/Suprabasal	0	2.05363	0	0.612	0.015	0.597
ENSG00000131981	LGALS3	Basal/Suprabasal	0	2.44473	0	0.834	0.241	0.593
ENSG00000170345	FOS	Basal/Suprabasal	1.325e-258	2.16599	4.84803e-254	0.902	0.309	0.593
ENSG00000165092	ALDH1A1	Basal/Suprabasal	0	1.24539	0	0.62	0.029	0.591
ENSG00000188643	S100A16	Basal/Suprabasal	0	1.14968	0	0.675	0.098	0.577
ENSG00000008517	IL32	Basal/Suprabasal	1.16693e-301	1.45133	4.26967e-297	0.677	0.107	0.57
ENSG00000010278	CD9	Basal/Suprabasal	6.52443e-232	0.998944	2.38722e-227	0.744	0.174	0.57
ENSG00000116285	ERRFI1	Basal/Suprabasal	1.1398e-256	1.42895	4.1704e-252	0.752	0.182	0.57
ENSG00000166145	SPINT1	Basal/Suprabasal	7.22862e-304	1.10229	2.64488e-299	0.657	0.089	0.568
ENSG00000120738	EGR1	Basal/Suprabasal	7.78185e-22	1.37572	2.8473e-17	0.843	0.281	0.562
ENSG00000150540	HNMT	Basal/Suprabasal	0	1.26444	0	0.629	0.075	0.554
ENSG00000136826	KLF4	Basal/Suprabasal	0	1.5114	0	0.643	0.091	0.552
ENSG00000138772	ANXA3	Basal/Suprabasal	0	1.1708	0	0.651	0.099	0.552
ENSG00000267795	SMIM22	Basal/Suprabasal	0	1.089	0	0.605	0.053	0.552
ENSG00000162772	ATF3	Basal/Suprabasal	1.21386e-274	1.89658	4.44138e-270	0.868	0.317	0.551
ENSG00000105707	HPN	Basal/Suprabasal	0	1.05749	0	0.576	0.033	0.543
ENSG00000157399	ARSE	Basal/Suprabasal	0	1.1214	0	0.574	0.037	0.537
ENSG00000107438	PDLIM1	Basal/Suprabasal	1.16623e-209	1.16139	4.26712e-205	0.724	0.19	0.534
ENSG00000120129	DUSP1	Basal/Suprabasal	5.9241e-66	1.51758	2.16757e-61	0.827	0.297	0.53
ENSG00000111057	KRT18	Basal/Suprabasal	0	1.74409	0	0.957	0.439	0.518
ENSG00000250722	SELENOP	Basal/Suprabasal	2.47612e-128	1.61373	9.05987e-124	0.711	0.197	0.514
ENSG00000227036	LINC00511	Basal/Suprabasal	8.31941e-128	1.20481	3.04399e-123	0.674	0.162	0.512
ENSG00000115738	ID2	Basal/Suprabasal	1.37482e-62	1.40539	5.03032e-58	0.865	0.356	0.509
ENSG00000154639	CXADR	Basal/Suprabasal	0	1.26451	0	0.781	0.275	0.506
ENSG00000128016	ZFP36	Basal/Suprabasal	7.61811e-17	0.800333	2.78739e-12	0.722	0.217	0.505
ENSG00000021355	SERPINB1	Basal/Suprabasal	0	1.10505	0	0.593	0.093	0.5
ENSG00000124429	POF1B	Basal/Suprabasal	0	1.05485	0	0.504	0.006	0.498
ENSG00000118640	VAMP8	Basal/Suprabasal	8.59978e-273	0.854924	3.14657e-268	0.631	0.136	0.495
ENSG00000142871	CCN1	Basal/Suprabasal	3.4531e-23	1.25771	1.26345e-18	0.745	0.253	0.492
ENSG00000148926	ADM	Basal/Suprabasal	1.8014e-94	1.13999	6.59114e-90	0.647	0.156	0.491
ENSG00000214530	STARD10	Basal/Suprabasal	2.30817e-180	0.955086	8.44538e-176	0.613	0.127	0.486
ENSG00000150687	PRSS23	Basal/Suprabasal	0	1.28072	1.68437e-307	0.588	0.106	0.482
ENSG00000145632	PLK2	Basal/Suprabasal	1.4417e-295	1.14016	5.27503e-291	0.625	0.152	0.473
ENSG00000087074	PPP1R15A	Basal/Suprabasal	5.17184e-05	0.965863	1	0.835	0.365	0.47
ENSG00000112378	PERP	Basal/Suprabasal	2.26622e-74	1.07486	8.29186e-70	0.816	0.346	0.47
ENSG00000111802	TDP2	Basal/Suprabasal	0	1.18964	0	0.647	0.178	0.469
ENSG00000127831	VIL1	Basal/Suprabasal	0	0.87689	0	0.494	0.025	0.469
ENSG00000176485	PLAAT3	Basal/Suprabasal	0	0.966327	3.94042e-307	0.562	0.093	0.469
ENSG00000117394	SLC2A1	Basal/Suprabasal	0	1.56133	0	0.807	0.34	0.467
ENSG00000111859	NEDD9	Basal/Suprabasal	7.06341e-157	1.03969	2.58443e-152	0.584	0.118	0.466
ENSG00000132170	PPARG	Basal/Suprabasal	0	1.05139	0	0.497	0.032	0.465
ENSG00000244187	TMEM141	Basal/Suprabasal	0	1.70618	0	0.907	0.444	0.463
ENSG00000160180	TFF3	Basal/Suprabasal	3.64948e-165	1.0957	1.33531e-160	0.538	0.076	0.462
ENSG00000013588	GPRC5A	Basal/Suprabasal	9.16667e-209	1.04288	3.35399e-204	0.538	0.077	0.461
ENSG00000006611	USH1C	Basal/Suprabasal	0	0.870729	0	0.465	0.005	0.46
ENSG00000093010	COMT	Basal/Suprabasal	0	0.905347	0	0.562	0.109	0.453
ENSG00000114315	HES1	Basal/Suprabasal	4.21127e-166	1.81173	1.54086e-161	0.842	0.389	0.453
ENSG00000177606	JUN	Basal/Suprabasal	1.00669e-15	1.46576	3.68337e-11	0.935	0.484	0.451
ENSG00000125740	FOSB	Basal/Suprabasal	7.48723e-20	0.941341	2.7395e-15	0.633	0.184	0.449
ENSG00000173467	AGR3	Basal/Suprabasal	0	1.19529	0	0.45	0.005	0.445
ENSG00000183844	FAM3B	Basal/Suprabasal	5.72447e-254	0.889036	2.09452e-249	0.488	0.043	0.445
ENSG00000051523	CYBA	Basal/Suprabasal	1.07536e-171	1.03224	3.93464e-167	0.776	0.332	0.444
ENSG00000089327	FXYD5	Basal/Suprabasal	9.80738e-118	0.9034	3.58842e-113	0.601	0.157	0.444
ENSG00000104419	NDRG1	Basal/Suprabasal	2.61214e-148	1.01359	9.55756e-144	0.582	0.147	0.435
ENSG00000161249	DMKN	Basal/Suprabasal	2.65607e-148	0.809147	9.7183e-144	0.585	0.15	0.435
ENSG00000198075	SULT1C4	Basal/Suprabasal	3.48943e-274	1.06681	1.27675e-269	0.552	0.118	0.434
ENSG00000112773	TENT5A	Basal/Suprabasal	5.44679e-227	1.09657	1.99293e-222	0.603	0.17	0.433
ENSG00000119655	NPC2	Basal/Suprabasal	0	0.393533	0	0.907	0.477	0.43
ENSG00000163191	S100A11	Basal/Suprabasal	1.21022e-171	0.494566	4.42807e-167	0.918	0.488	0.43
ENSG00000049759	NEDD4L	Basal/Suprabasal	1.90374e-172	1.04673	6.96561e-168	0.698	0.271	0.427
ENSG00000079112	CDH17	Basal/Suprabasal	0	1.03097	0	0.432	0.005	0.427
ENSG00000157992	KRTCAP3	Basal/Suprabasal	0	0.857834	0	0.583	0.158	0.425
ENSG00000244509	APOBEC3C	Basal/Suprabasal	0	1.20501	0	0.508	0.084	0.424
ENSG00000090013	BLVRB	Basal/Suprabasal	5.63869e-57	0.890228	2.06314e-52	0.716	0.298	0.418
ENSG00000142910	TINAGL1	Basal/Suprabasal	1.61364e-269	0.816128	5.90415e-265	0.448	0.031	0.417
ENSG00000173890	GPR160	Basal/Suprabasal	0	0.886488	0	0.454	0.04	0.414
ENSG00000272398	CD24	Basal/Suprabasal	0	1.09718	0	0.857	0.443	0.414
ENSG00000120690	ELF1	Basal/Suprabasal	1.01352e-215	0.995767	3.70835e-211	0.67	0.265	0.405
ENSG00000173334	TRIB1	Basal/Suprabasal	1.91989e-122	0.958046	7.02467e-118	0.549	0.144	0.405
ENSG00000280878	AC017002.5	Basal/Suprabasal	2.20317e-158	1.02058	8.06117e-154	0.482	0.077	0.405
ENSG00000116017	ARID3A	Basal/Suprabasal	1.49411e-230	0.927841	5.46681e-226	0.534	0.132	0.402
ENSG00000139540	SLC39A5	Basal/Suprabasal	0	0.735639	0	0.411	0.009	0.402
ENSG00000169908	TM4SF1	Basal/Suprabasal	1.29967e-120	1.67502	4.75535e-116	0.476	0.074	0.402
ENSG00000258818	RNASE4	Basal/Suprabasal	1.82233e-82	0.771773	6.66773e-78	0.511	0.111	0.4
ENSG00000109321	AREG	Basal/Suprabasal	1.23245e-115	1.47755	4.50941e-111	0.479	0.082	0.397
ENSG00000117318	ID3	Basal/Suprabasal	1.20576e-06	0.943414	0.0441175	0.786	0.389	0.397
ENSG00000171223	JUNB	Basal/Suprabasal	5.60087e-152	0.616819	2.0493e-147	0.869	0.474	0.395
ENSG00000130449	ZSWIM6	Basal/Suprabasal	3.50144e-15	0.987698	1.28114e-10	0.759	0.365	0.394
ENSG00000170545	SMAGP	Basal/Suprabasal	0	0.749064	0	0.432	0.038	0.394
ENSG00000067082	KLF6	Basal/Suprabasal	3.12209e-19	1.1699	1.14234e-14	0.829	0.44	0.389
ENSG00000243004	AC005062.1	Basal/Suprabasal	5.08098e-179	0.959249	1.85908e-174	0.435	0.047	0.388
ENSG00000182718	ANXA2	Basal/Suprabasal	0	0.332402	0	0.944	0.56	0.384
ENSG00000156675	RAB11FIP1	Basal/Suprabasal	1.75525e-187	0.9357	6.42227e-183	0.619	0.237	0.382
ENSG00000134240	HMGCS2	Basal/Suprabasal	0	0.885853	0	0.396	0.015	0.381
ENSG00000101076	HNF4A	Basal/Suprabasal	0	0.799859	0	0.386	0.007	0.379
ENSG00000141526	SLC16A3	Basal/Suprabasal	3.47523e-68	0.525115	1.27155e-63	0.691	0.315	0.376
ENSG00000157483	MYO1E	Basal/Suprabasal	1.43101e-243	1.26999	5.23592e-239	0.71	0.334	0.376
ENSG00000147676	MAL2	Basal/Suprabasal	4.60205e-162	0.68202	1.68384e-157	0.456	0.083	0.373
ENSG00000169692	AGPAT2	Basal/Suprabasal	1.30294e-215	0.951649	4.76731e-211	0.675	0.302	0.373
ENSG00000132002	DNAJB1	Basal/Suprabasal	1.60631e-59	1.07329	5.87731e-55	0.728	0.356	0.372
ENSG00000105699	LSR	Basal/Suprabasal	6.45739e-127	0.72347	2.3627e-122	0.517	0.147	0.37
ENSG00000174567	GOLT1A	Basal/Suprabasal	3.71284e-228	0.755462	1.35849e-223	0.403	0.033	0.37
ENSG00000138119	MYOF	Basal/Suprabasal	1.60221e-96	0.876995	5.86231e-92	0.489	0.12	0.369
ENSG00000167608	TMC4	Basal/Suprabasal	1.88621e-174	0.664266	6.90147e-170	0.419	0.05	0.369
ENSG00000164442	CITED2	Basal/Suprabasal	3.47059e-24	0.866715	1.26985e-19	0.612	0.244	0.368
ENSG00000085871	MGST2	Basal/Suprabasal	3.27044e-209	0.942057	1.19662e-204	0.708	0.342	0.366
ENSG00000115109	EPB41L5	Basal/Suprabasal	1.65065e-206	0.908866	6.03955e-202	0.595	0.231	0.364
ENSG00000104870	FCGRT	Basal/Suprabasal	4.32801e-43	0.860704	1.58358e-38	0.687	0.324	0.363
ENSG00000111912	NCOA7	Basal/Suprabasal	2.76566e-257	1.07658	1.01193e-252	0.63	0.269	0.361
ENSG00000139289	PHLDA1	Basal/Suprabasal	2.90766e-07	0.739871	0.0106388	0.553	0.193	0.36
ENSG00000176153	GPX2	Basal/Suprabasal	0	0.7382	0	0.372	0.013	0.359
ENSG00000135269	TES	Basal/Suprabasal	2.56113e-94	0.704534	9.37094e-90	0.493	0.135	0.358
ENSG00000160888	IER2	Basal/Suprabasal	9.83228e-15	1.20582	3.59753e-10	0.88	0.524	0.356
ENSG00000248771	SMIM31	Basal/Suprabasal	1.32512e-190	0.706515	4.84847e-186	0.388	0.032	0.356
ENSG00000185022	MAFF	Basal/Suprabasal	1.61801e-19	0.671274	5.92013e-15	0.497	0.144	0.353
ENSG00000000003	TSPAN6	Basal/Suprabasal	0	1.15863	0	0.793	0.441	0.352
ENSG00000111907	TPD52L1	Basal/Suprabasal	0	1.27654	0	0.739	0.39	0.349
ENSG00000147872	PLIN2	Basal/Suprabasal	0	1.50314	0	0.795	0.446	0.349
ENSG00000165556	CDX2	Basal/Suprabasal	0	0.776182	0	0.352	0.003	0.349
ENSG00000100079	LGALS2	Basal/Suprabasal	0	0.968446	0	0.354	0.007	0.347
ENSG00000177984	LCN15	Basal/Suprabasal	0	3.4186	0	0.363	0.016	0.347
ENSG00000214274	ANG	Basal/Suprabasal	8.94895e-134	0.718611	3.27433e-129	0.43	0.083	0.347
ENSG00000205544	TMEM256	Basal/Suprabasal	0	1.53529	0	0.944	0.599	0.345
ENSG00000173221	GLRX	Basal/Suprabasal	5.44043e-39	0.738652	1.9906e-34	0.525	0.183	0.342
ENSG00000246705	H2AFJ	Basal/Suprabasal	1.31087e-24	0.738583	4.79634e-20	0.648	0.311	0.337
ENSG00000130513	GDF15	Basal/Suprabasal	7.2329e-81	0.963591	2.64645e-76	0.463	0.127	0.336
ENSG00000146376	ARHGAP18	Basal/Suprabasal	5.9014e-272	0.701453	2.15926e-267	0.489	0.153	0.336
ENSG00000143153	ATP1B1	Basal/Suprabasal	3.75891e-170	1.0553	1.37535e-165	0.692	0.359	0.333
ENSG00000105755	ETHE1	Basal/Suprabasal	4.91012e-207	0.874206	1.79657e-202	0.607	0.275	0.332
ENSG00000196141	SPATS2L	Basal/Suprabasal	1.73231e-55	0.863933	6.33833e-51	0.746	0.415	0.331
ENSG00000100373	UPK3A	Basal/Suprabasal	0	0.656895	0	0.334	0.004	0.33
ENSG00000113924	HGD	Basal/Suprabasal	0	0.59982	0	0.338	0.01	0.328
ENSG00000062716	VMP1	Basal/Suprabasal	2.81663e-111	1.0849	1.03058e-106	0.835	0.508	0.327
ENSG00000118507	AKAP7	Basal/Suprabasal	0	0.943112	0	0.491	0.165	0.326
ENSG00000178078	STAP2	Basal/Suprabasal	1.94486e-184	0.620168	7.11606e-180	0.423	0.098	0.325
ENSG00000105650	PDE4C	Basal/Suprabasal	1.42354e-87	0.92457	5.20861e-83	0.395	0.074	0.321
ENSG00000165078	CPA6	Basal/Suprabasal	2.90893e-231	0.871336	1.06435e-226	0.408	0.087	0.321
ENSG00000204385	SLC44A4	Basal/Suprabasal	6.41065e-264	0.634717	2.34559e-259	0.334	0.015	0.319
ENSG00000215845	TSTD1	Basal/Suprabasal	3.02299e-257	0.786383	1.10608e-252	0.689	0.372	0.317
ENSG00000184305	CCSER1	Basal/Suprabasal	0	0.910338	0	0.736	0.42	0.316
ENSG00000197822	OCLN	Basal/Suprabasal	3.11844e-145	0.625737	1.14101e-140	0.395	0.08	0.315
ENSG00000145012	LPP	Basal/Suprabasal	2.09155e-07	0.780822	0.00765277	0.78	0.466	0.314
ENSG00000143036	SLC44A3	Basal/Suprabasal	3.39982e-177	0.572634	1.24396e-172	0.352	0.039	0.313
ENSG00000095739	BAMBI	Basal/Suprabasal	7.42104e-135	0.722896	2.71528e-130	0.423	0.112	0.311
ENSG00000177426	TGIF1	Basal/Suprabasal	3.32092e-89	0.722157	1.21509e-84	0.523	0.212	0.311
ENSG00000112304	ACOT13	Basal/Suprabasal	0	0.882493	0	0.66	0.351	0.309
ENSG00000003147	ICA1	Basal/Suprabasal	1.4267e-135	0.580062	5.22015e-131	0.389	0.081	0.308
ENSG00000222041	CYTOR	Basal/Suprabasal	5.49458e-16	0.811774	2.01041e-11	0.578	0.271	0.307
ENSG00000242242	NECTIN3-AS1	Basal/Suprabasal	0	2.18413	0	0.962	0.656	0.306
ENSG00000153714	LURAP1L	Basal/Suprabasal	1.91822e-45	0.661948	7.01859e-41	0.408	0.103	0.305
ENSG00000129007	CALML4	Basal/Suprabasal	0	0.905998	0	0.471	0.167	0.304
ENSG00000187017	ESPN	Basal/Suprabasal	1.65399e-159	0.586645	6.05178e-155	0.354	0.051	0.303
ENSG00000143878	RHOB	Basal/Suprabasal	3.58483e-23	0.63742	1.31165e-18	0.677	0.375	0.302
ENSG00000052344	PRSS8	Basal/Suprabasal	7.45374e-116	0.57269	2.72725e-111	0.342	0.044	0.298
ENSG00000160182	TFF1	Basal/Suprabasal	7.98464e-272	1.37645	2.9215e-267	0.305	0.008	0.297
ENSG00000173801	JUP	Basal/Suprabasal	2.82225e-103	0.550272	1.03263e-98	0.365	0.073	0.292
ENSG00000265972	TXNIP	Basal/Suprabasal	3.76267e-78	0.830427	1.37672e-73	0.493	0.201	0.292
ENSG00000184697	CLDN6	Basal/Suprabasal	1.38796e-118	0.545581	5.0784e-114	0.338	0.048	0.29
ENSG00000109814	UGDH	Basal/Suprabasal	2.93173e-106	0.767597	1.07269e-101	0.599	0.311	0.288
ENSG00000171227	TMEM37	Basal/Suprabasal	4.33101e-220	0.587247	1.58467e-215	0.321	0.035	0.286
ENSG00000171564	FGB	Basal/Suprabasal	0	0.904721	0	0.289	0.003	0.286
ENSG00000236830	CBR3-AS1	Basal/Suprabasal	7.2937e-70	0.534853	2.66869e-65	0.343	0.057	0.286
ENSG00000163993	S100P	Basal/Suprabasal	4.48051e-288	0.879796	1.63937e-283	0.29	0.005	0.285
ENSG00000181649	PHLDA2	Basal/Suprabasal	5.40271e-39	0.884636	1.9768e-34	0.503	0.218	0.285
ENSG00000137880	GCHFR	Basal/Suprabasal	2.87611e-90	0.649427	1.05234e-85	0.48	0.198	0.282
ENSG00000166900	STX3	Basal/Suprabasal	1.88807e-70	0.573046	6.90826e-66	0.421	0.14	0.281
ENSG00000196586	MYO6	Basal/Suprabasal	3.49816e-139	0.696095	1.27994e-134	0.513	0.232	0.281
ENSG00000213722	DDAH2	Basal/Suprabasal	7.64341e-21	0.588551	2.79665e-16	0.527	0.246	0.281
ENSG00000124788	ATXN1	Basal/Suprabasal	4.35893e-80	0.814544	1.59489e-75	0.574	0.295	0.279
ENSG00000130202	NECTIN2	Basal/Suprabasal	4.84902e-33	0.589191	1.77421e-28	0.497	0.218	0.279
ENSG00000149573	MPZL2	Basal/Suprabasal	4.21584e-170	0.511058	1.54253e-165	0.302	0.025	0.277
ENSG00000129354	AP1M2	Basal/Suprabasal	1.07994e-103	0.471141	3.95138e-99	0.325	0.049	0.276
ENSG00000167183	PRR15L	Basal/Suprabasal	9.14154e-193	0.506683	3.3448e-188	0.291	0.015	0.276
ENSG00000185650	ZFP36L1	Basal/Suprabasal	2.41281e-131	0.50186	8.82824e-127	0.732	0.456	0.276
ENSG00000134152	KATNBL1	Basal/Suprabasal	0	2.18498	0	0.767	0.492	0.275
ENSG00000073350	LLGL2	Basal/Suprabasal	5.42834e-150	0.526592	1.98618e-145	0.345	0.073	0.272
ENSG00000125378	BMP4	Basal/Suprabasal	9.67688e-140	0.630104	3.54067e-135	0.363	0.091	0.272
ENSG00000092820	EZR	Basal/Suprabasal	1.7293e-305	0.839975	6.32735e-301	0.667	0.397	0.27
ENSG00000196975	ANXA4	Basal/Suprabasal	0	1.06683	0	0.563	0.293	0.27
ENSG00000119431	HDHD3	Basal/Suprabasal	2.82911e-215	0.639136	1.03514e-210	0.411	0.142	0.269
ENSG00000166347	CYB5A	Basal/Suprabasal	2.06496e-53	0.704999	7.55548e-49	0.723	0.454	0.269
ENSG00000183283	DAZAP2	Basal/Suprabasal	5.21952e-57	0.69333	1.90977e-52	0.604	0.335	0.269
ENSG00000104823	ECH1	Basal/Suprabasal	0	1.15936	0	0.826	0.558	0.268
ENSG00000183734	ASCL2	Basal/Suprabasal	4.59374e-189	0.555334	1.68081e-184	0.293	0.025	0.268
ENSG00000106258	CYP3A5	Basal/Suprabasal	4.20893e-211	0.641347	1.54e-206	0.302	0.035	0.267
ENSG00000130545	CRB3	Basal/Suprabasal	1.92671e-92	0.445518	7.04965e-88	0.306	0.039	0.267
ENSG00000053438	NNAT	Basal/Suprabasal	9.13802e-95	0.842066	3.34351e-90	0.531	0.265	0.266
ENSG00000149418	ST14	Basal/Suprabasal	2.92653e-79	0.493474	1.07079e-74	0.309	0.043	0.266
ENSG00000161011	SQSTM1	Basal/Suprabasal	1.30391e-12	0.871053	4.77087e-08	0.896	0.634	0.262
ENSG00000159388	BTG2	Basal/Suprabasal	2.79594e-06	0.630844	0.102301	0.548	0.287	0.261
ENSG00000182472	CAPN12	Basal/Suprabasal	2.62767e-125	0.52702	9.6144e-121	0.307	0.046	0.261
ENSG00000106537	TSPAN13	Basal/Suprabasal	1.12206e-78	0.57334	4.10549e-74	0.492	0.232	0.26
ENSG00000116209	TMEM59	Basal/Suprabasal	3.40805e-40	0.903692	1.24697e-35	0.839	0.579	0.26
ENSG00000138207	RBP4	Basal/Suprabasal	4.28666e-164	0.780212	1.56844e-159	0.32	0.064	0.256
ENSG00000204386	NEU1	Basal/Suprabasal	6.06216e-19	0.607796	2.21808e-14	0.551	0.296	0.255
ENSG00000167306	MYO5B	Basal/Suprabasal	1.27844e-89	0.490367	4.6777e-85	0.302	0.048	0.254
ENSG00000169764	UGP2	Basal/Suprabasal	4.25052e-18	0.540299	1.55522e-13	0.671	0.418	0.253
ENSG00000197019	SERTAD1	Basal/Suprabasal	8.73693e-36	0.427693	3.19676e-31	0.48	0.227	0.253
ENSG00000103811	CTSH	Basal/Suprabasal	6.49954e-48	0.637215	2.37812e-43	0.51	0.258	0.252
ENSG00000183779	ZNF703	Basal/Suprabasal	1.01039e-139	0.506063	3.6969e-135	0.342	0.091	0.251
ENSG00000065361	ERBB3	Basal/Suprabasal	7.81179e-122	0.466017	2.85825e-117	0.285	0.035	0.25
ENSG00000152894	PTPRK	Basal/Suprabasal	0	1.08545	0	0.778	0.528	0.25
ENSG00000145819	ARHGAP26	Basal/Suprabasal	2.83468e-182	0.630636	1.03718e-177	0.408	0.159	0.249
ENSG00000226742	HSBP1L1	Basal/Suprabasal	1.95529e-16	0.515197	7.15422e-12	0.48	0.231	0.249
ENSG00000170540	ARL6IP1	Basal/Suprabasal	7.94257e-209	1.03946	2.90611e-204	0.83	0.582	0.248
ENSG00000164096	C4orf3	Basal/Suprabasal	1.32116e-261	1.39727	4.834e-257	0.974	0.727	0.247
ENSG00000165443	PHYHIPL	Basal/Suprabasal	9.77613e-180	0.498984	3.57699e-175	0.299	0.052	0.247
ENSG00000122877	EGR2	Basal/Suprabasal	6.35428e-55	0.509112	2.32497e-50	0.295	0.049	0.246
ENSG00000142273	CBLC	Basal/Suprabasal	3.15341e-202	0.426564	1.1538e-197	0.256	0.01	0.246
ENSG00000196126	HLA-DRB1	Basal/Suprabasal	2.35847e-146	0.524847	8.62941e-142	0.284	0.038	0.246
ENSG00000109107	ALDOC	Basal/Suprabasal	1.84161e-26	0.502112	6.73825e-22	0.431	0.186	0.245
ENSG00000137642	SORL1	Basal/Suprabasal	1.78467e-157	0.577158	6.52993e-153	0.342	0.097	0.245
ENSG00000051108	HERPUD1	Basal/Suprabasal	1.78729e-25	0.853016	6.53952e-21	0.715	0.471	0.244
ENSG00000197956	S100A6	Basal/Suprabasal	6.17244e-59	0.315864	2.25843e-54	0.478	0.235	0.243
ENSG00000147050	KDM6A	Basal/Suprabasal	9.19355e-210	0.895327	3.36383e-205	0.521	0.279	0.242
ENSG00000165895	ARHGAP42	Basal/Suprabasal	1.39965e-155	0.69702	5.12119e-151	0.425	0.183	0.242
ENSG00000227121	LINC02672	Basal/Suprabasal	1.47514e-248	0.636846	5.39739e-244	0.246	0.004	0.242
ENSG00000176658	MYO1D	Basal/Suprabasal	7.23223e-48	0.651855	2.6462e-43	0.498	0.257	0.241
ENSG00000171617	ENC1	Basal/Suprabasal	1.84589e-105	0.503896	6.75394e-101	0.346	0.106	0.24
ENSG00000145390	USP53	Basal/Suprabasal	5.36065e-46	0.697283	1.96141e-41	0.509	0.27	0.239
ENSG00000197249	SERPINA1	Basal/Suprabasal	6.27282e-132	1.21422	2.29516e-127	0.259	0.02	0.239
ENSG00000059804	SLC2A3	Basal/Suprabasal	5.24884e-34	0.698156	1.9205e-29	0.436	0.198	0.238
ENSG00000072778	ACADVL	Basal/Suprabasal	1.06318e-76	0.619082	3.89008e-72	0.578	0.34	0.238
ENSG00000135525	MAP7	Basal/Suprabasal	1.01271e-62	0.463017	3.70539e-58	0.349	0.111	0.238
ENSG00000198561	CTNND1	Basal/Suprabasal	3.53054e-87	0.651111	1.29179e-82	0.57	0.332	0.238
ENSG00000007944	MYLIP	Basal/Suprabasal	8.65303e-55	0.535297	3.16606e-50	0.389	0.152	0.237
ENSG00000163513	TGFBR2	Basal/Suprabasal	3.37841e-45	0.582272	1.23613e-40	0.359	0.122	0.237
ENSG00000122870	BICC1	Basal/Suprabasal	3.51215e-156	0.96636	1.28506e-151	0.602	0.366	0.236
ENSG00000102471	NDFIP2	Basal/Suprabasal	1.78779e-93	0.560578	6.54133e-89	0.458	0.223	0.235
ENSG00000172201	ID4	Basal/Suprabasal	5.95013e-21	0.583434	2.17709e-16	0.399	0.164	0.235
ENSG00000082556	OPRK1	Basal/Suprabasal	2.52001e-212	0.441249	9.22045e-208	0.24	0.006	0.234
ENSG00000125968	ID1	Basal/Suprabasal	1.67578e-31	0.968047	6.13151e-27	0.867	0.633	0.234
ENSG00000182379	NXPH4	Basal/Suprabasal	5.61408e-157	0.470112	2.05414e-152	0.318	0.084	0.234
ENSG00000141580	WDR45B	Basal/Suprabasal	1.63861e-79	0.737224	5.99552e-75	0.693	0.46	0.233
ENSG00000168528	SERINC2	Basal/Suprabasal	1.49422e-12	0.396919	5.46721e-08	0.405	0.172	0.233
ENSG00000198189	HSD17B11	Basal/Suprabasal	4.43027e-81	0.559978	1.62099e-76	0.432	0.199	0.233
ENSG00000092010	PSME1	Basal/Suprabasal	3.55314e-62	0.659949	1.30006e-57	0.665	0.434	0.231
ENSG00000104067	TJP1	Basal/Suprabasal	3.67347e-263	0.950416	1.34409e-258	0.719	0.489	0.23
ENSG00000122644	ARL4A	Basal/Suprabasal	3.68446e-125	0.714856	1.34811e-120	0.523	0.293	0.23
ENSG00000149269	PAK1	Basal/Suprabasal	3.99966e-103	0.557997	1.46344e-98	0.494	0.264	0.23
ENSG00000156026	MCU	Basal/Suprabasal	4.23845e-121	0.690411	1.55081e-116	0.531	0.303	0.228
ENSG00000162545	CAMK2N1	Basal/Suprabasal	7.43312e-184	0.47511	2.71971e-179	0.299	0.071	0.228
ENSG00000152518	ZFP36L2	Basal/Suprabasal	1.70946e-303	0.722371	6.25473e-299	0.54	0.313	0.227
ENSG00000060971	ACAA1	Basal/Suprabasal	8.11252e-190	0.60629	2.96829e-185	0.504	0.278	0.226
ENSG00000205517	RGL3	Basal/Suprabasal	1.933e-44	0.410525	7.07264e-40	0.277	0.051	0.226
ENSG00000183807	FAM162B	Basal/Suprabasal	1.6726e-208	0.479805	6.11986e-204	0.255	0.03	0.225
ENSG00000241388	HNF1A-AS1	Basal/Suprabasal	1.91147e-175	0.4065	6.99388e-171	0.236	0.012	0.224
ENSG00000012171	SEMA3B	Basal/Suprabasal	4.96658e-131	0.444903	1.81722e-126	0.254	0.031	0.223
ENSG00000112972	HMGCS1	Basal/Suprabasal	3.59505e-84	0.791486	1.31539e-79	0.566	0.344	0.222
ENSG00000143158	MPC2	Basal/Suprabasal	2.24595e-255	0.773796	8.2177e-251	0.68	0.459	0.221
ENSG00000119227	PIGZ	Basal/Suprabasal	5.9712e-154	0.464711	2.1848e-149	0.26	0.042	0.218
ENSG00000133639	BTG1	Basal/Suprabasal	1.36003e-77	1.10623	4.9762e-73	0.904	0.686	0.218
ENSG00000157110	RBPMS	Basal/Suprabasal	6.54866e-27	0.566733	2.39609e-22	0.465	0.247	0.218
ENSG00000163879	DNALI1	Basal/Suprabasal	3.49904e-85	0.440205	1.28026e-80	0.306	0.088	0.218
ENSG00000109046	WSB1	Basal/Suprabasal	1.09769e-40	0.610463	4.01632e-36	0.845	0.628	0.217
ENSG00000123358	NR4A1	Basal/Suprabasal	1.00024e-08	0.484839	0.000365976	0.382	0.165	0.217
ENSG00000124570	SERPINB6	Basal/Suprabasal	1.17121e-33	0.51897	4.28533e-29	0.531	0.314	0.217
ENSG00000124762	CDKN1A	Basal/Suprabasal	5.5693e-26	0.373691	2.03775e-21	0.478	0.261	0.217
ENSG00000104413	ESRP1	Basal/Suprabasal	8.40677e-79	0.367136	3.07595e-74	0.249	0.033	0.216
ENSG00000167105	TMEM92	Basal/Suprabasal	8.29593e-125	0.47	3.0354e-120	0.237	0.021	0.216
ENSG00000172175	MALT1	Basal/Suprabasal	7.081e-103	0.653197	2.59087e-98	0.481	0.267	0.214
ENSG00000172818	OVOL1	Basal/Suprabasal	1.3558e-189	0.387749	4.96074e-185	0.22	0.006	0.214
ENSG00000073067	CYP2W1	Basal/Suprabasal	8.79867e-210	0.626691	3.21935e-205	0.216	0.004	0.212
ENSG00000140416	TPM1	Basal/Suprabasal	6.41635e-18	0.582053	2.34768e-13	0.735	0.524	0.211
ENSG00000139219	COL2A1	Basal/Suprabasal	0	0.570198	0	0.421	0.212	0.209
ENSG00000186834	HEXIM1	Basal/Suprabasal	3.50565e-16	0.432353	1.28268e-11	0.338	0.129	0.209
ENSG00000231969	AC007364.1	Basal/Suprabasal	5.10747e-126	0.433924	1.86877e-121	0.249	0.04	0.209
ENSG00000253293	HOXA10	Basal/Suprabasal	4.6268e-76	0.388138	1.6929e-71	0.245	0.036	0.209
ENSG00000150347	ARID5B	Basal/Suprabasal	2.41606e-05	0.559471	0.884013	0.502	0.294	0.208
ENSG00000065717	TLE2	Basal/Suprabasal	4.90556e-69	0.349464	1.79489e-64	0.238	0.031	0.207
ENSG00000116194	ANGPTL1	Basal/Suprabasal	1.45318e-22	0.450462	5.31703e-18	0.306	0.1	0.206
ENSG00000135929	CYP27A1	Basal/Suprabasal	4.98964e-49	0.412128	1.82566e-44	0.277	0.071	0.206
ENSG00000243955	GSTA1	Basal/Suprabasal	5.15582e-74	0.675061	1.88646e-69	0.23	0.024	0.206
ENSG00000099812	MISP	Basal/Suprabasal	5.62293e-103	0.381629	2.05737e-98	0.222	0.017	0.205
ENSG00000159166	LAD1	Basal/Suprabasal	5.29941e-143	0.360168	1.939e-138	0.218	0.014	0.204
ENSG00000064651	SLC12A2	Basal/Suprabasal	6.97769e-190	0.789114	2.55307e-185	0.547	0.344	0.203
ENSG00000259345	AC013652.1	Basal/Suprabasal	5.85965e-93	0.489696	2.14399e-88	0.401	0.198	0.203
ENSG00000100219	XBP1	Basal/Suprabasal	5.20796e-11	0.547114	1.90554e-06	0.731	0.529	0.202
ENSG00000172071	EIF2AK3	Basal/Suprabasal	2.82945e-16	0.437541	1.03527e-11	0.346	0.145	0.201
ENSG00000236699	ARHGEF38	Basal/Suprabasal	2.19726e-81	0.38927	8.03955e-77	0.231	0.03	0.201
ENSG00000155366	RHOC	Basal/Suprabasal	1.59681e-99	0.335756	5.84258e-95	0.596	0.396	0.2
ENSG00000054179	ENTPD2	Basal/Suprabasal	3.84244e-189	0.384864	1.40591e-184	0.207	0.008	0.199
ENSG00000130402	ACTN4	Basal/Suprabasal	6.52661e-254	0.804557	2.38802e-249	0.724	0.525	0.199
ENSG00000099849	RASSF7	Basal/Suprabasal	3.30623e-54	0.374689	1.20972e-49	0.271	0.073	0.198
ENSG00000135048	CEMIP2	Basal/Suprabasal	6.23422e-22	0.554275	2.28104e-17	0.573	0.375	0.198
ENSG00000146278	PNRC1	Basal/Suprabasal	3.60587e-150	0.293806	1.31935e-145	0.662	0.464	0.198
ENSG00000151491	EPS8	Basal/Suprabasal	1.50542e-89	0.558062	5.50817e-85	0.417	0.219	0.198
ENSG00000020577	SAMD4A	Basal/Suprabasal	1.15172e-31	0.571509	4.21403e-27	0.501	0.305	0.196
ENSG00000090382	LYZ	Basal/Suprabasal	7.74634e-213	0.566885	2.83431e-208	0.198	0.002	0.196
ENSG00000152413	HOMER1	Basal/Suprabasal	3.29117e-19	0.830353	1.20421e-14	0.61	0.414	0.196
ENSG00000189325	BNIP5	Basal/Suprabasal	7.04278e-208	0.45374	2.57688e-203	0.198	0.002	0.196
ENSG00000137767	SQOR	Basal/Suprabasal	1.66315e-49	0.338323	6.0853e-45	0.234	0.039	0.195
ENSG00000182568	SATB1	Basal/Suprabasal	1.6136e-131	0.370645	5.90399e-127	0.226	0.031	0.195
ENSG00000254687	AC009646.2	Basal/Suprabasal	4.0671e-171	0.461333	1.48811e-166	0.2	0.005	0.195
ENSG00000158769	F11R	Basal/Suprabasal	5.36329e-27	0.356961	1.96237e-22	0.27	0.076	0.194
ENSG00000115271	GCA	Basal/Suprabasal	6.74284e-60	0.372623	2.46714e-55	0.296	0.103	0.193
ENSG00000134755	DSC2	Basal/Suprabasal	7.79284e-115	0.393316	2.85132e-110	0.274	0.081	0.193
ENSG00000175482	POLD4	Basal/Suprabasal	2.73713e-41	0.336218	1.00149e-36	0.391	0.198	0.193
ENSG00000105855	ITGB8	Basal/Suprabasal	5.17009e-72	0.473945	1.89168e-67	0.295	0.103	0.192
ENSG00000187244	BCAM	Basal/Suprabasal	2.54392e-34	0.359777	9.30795e-30	0.29	0.098	0.192
ENSG00000095637	SORBS1	Basal/Suprabasal	7.03266e-49	0.407277	2.57318e-44	0.258	0.067	0.191
ENSG00000105519	CAPS	Basal/Suprabasal	7.18481e-136	0.389465	2.62885e-131	0.205	0.014	0.191
ENSG00000126218	F10	Basal/Suprabasal	2.49611e-40	0.354636	9.13302e-36	0.248	0.057	0.191
ENSG00000129226	CD68	Basal/Suprabasal	9.13022e-55	0.494272	3.34065e-50	0.261	0.07	0.191
ENSG00000137563	GGH	Basal/Suprabasal	2.79233e-181	0.733698	1.02168e-176	0.562	0.371	0.191
ENSG00000148584	A1CF	Basal/Suprabasal	1.86203e-147	0.333978	6.81299e-143	0.198	0.007	0.191
ENSG00000164690	SHH	Basal/Suprabasal	5.29594e-194	0.375249	1.93773e-189	0.196	0.005	0.191
ENSG00000186314	PRELID2	Basal/Suprabasal	1.778e-52	0.501436	6.50553e-48	0.446	0.255	0.191
ENSG00000188112	C6orf132	Basal/Suprabasal	7.79639e-108	0.420432	2.85262e-103	0.241	0.05	0.191
ENSG00000140968	IRF8	Basal/Suprabasal	8.09525e-189	0.343984	2.96197e-184	0.193	0.003	0.19
ENSG00000171243	SOSTDC1	Basal/Suprabasal	5.60926e-127	0.397079	2.05237e-122	0.215	0.025	0.19
ENSG00000018408	WWTR1	Basal/Suprabasal	7.44316e-24	0.547532	2.72338e-19	0.433	0.244	0.189
ENSG00000092758	COL9A3	Basal/Suprabasal	7.28629e-55	0.450436	2.66598e-50	0.259	0.07	0.189
ENSG00000133135	RNF128	Basal/Suprabasal	1.17775e-159	0.354414	4.30928e-155	0.204	0.015	0.189
ENSG00000068697	LAPTM4A	Basal/Suprabasal	2.39638e-158	0.389226	8.76813e-154	0.812	0.624	0.188
ENSG00000107159	CA9	Basal/Suprabasal	2.31574e-13	0.612045	8.47307e-09	0.44	0.252	0.188
ENSG00000163694	RBM47	Basal/Suprabasal	6.35917e-152	0.468163	2.32676e-147	0.456	0.268	0.188
ENSG00000143384	MCL1	Basal/Suprabasal	1.79807e-19	0.4968	6.57894e-15	0.554	0.367	0.187
ENSG00000146072	TNFRSF21	Basal/Suprabasal	3.5833e-55	0.489188	1.31109e-50	0.334	0.147	0.187
ENSG00000163683	SMIM14	Basal/Suprabasal	1.80675e-33	0.410923	6.61071e-29	0.294	0.107	0.187
ENSG00000108375	RNF43	Basal/Suprabasal	2.00814e-186	0.438352	7.34757e-182	0.302	0.116	0.186
ENSG00000182327	GLTPD2	Basal/Suprabasal	1.79655e-185	0.351283	6.57341e-181	0.19	0.004	0.186
ENSG00000226272	ARHGAP26-AS1	Basal/Suprabasal	1.41538e-114	0.397106	5.17873e-110	0.201	0.015	0.186
ENSG00000078269	SYNJ2	Basal/Suprabasal	3.0252e-32	0.405894	1.10689e-27	0.307	0.122	0.185
ENSG00000135926	TMBIM1	Basal/Suprabasal	4.0265e-17	0.379002	1.47326e-12	0.287	0.102	0.185
ENSG00000166165	CKB	Basal/Suprabasal	0	3.04935	0	0.996	0.811	0.185
ENSG00000076053	RBM7	Basal/Suprabasal	1.13693e-18	0.397664	4.15992e-14	0.403	0.219	0.184
ENSG00000119986	AVPI1	Basal/Suprabasal	5.3626e-94	0.460034	1.96212e-89	0.326	0.142	0.184
ENSG00000095066	HOOK2	Basal/Suprabasal	1.26729e-98	0.607127	4.63689e-94	0.608	0.425	0.183
ENSG00000118804	STBD1	Basal/Suprabasal	3.2637e-61	0.371115	1.19415e-56	0.251	0.068	0.183
ENSG00000125966	MMP24	Basal/Suprabasal	3.07032e-24	0.36532	1.1234e-19	0.372	0.189	0.183
ENSG00000160588	MPZL3	Basal/Suprabasal	1.06929e-71	0.36727	3.91242e-67	0.209	0.026	0.183
ENSG00000168894	RNF181	Basal/Suprabasal	8.07668e-46	0.668598	2.95518e-41	0.721	0.538	0.183
ENSG00000137575	SDCBP	Basal/Suprabasal	8.21406e-28	0.506452	3.00544e-23	0.643	0.461	0.182
ENSG00000175197	DDIT3	Basal/Suprabasal	3.84121e-57	0.319205	1.40546e-52	0.474	0.292	0.182
ENSG00000156711	MAPK13	Basal/Suprabasal	1.70994e-46	0.31935	6.25648e-42	0.235	0.054	0.181
ENSG00000186352	ANKRD37	Basal/Suprabasal	1.58812e-138	0.571931	5.81076e-134	0.348	0.168	0.18
ENSG00000136068	FLNB	Basal/Suprabasal	1.24556e-146	0.638465	4.55739e-142	0.509	0.33	0.179
ENSG00000035115	SH3YL1	Basal/Suprabasal	8.5805e-96	0.476058	3.13952e-91	0.427	0.249	0.178
ENSG00000089472	HEPH	Basal/Suprabasal	1.2055e-50	0.423098	4.4108e-46	0.232	0.054	0.178
ENSG00000140832	MARVELD3	Basal/Suprabasal	1.2937e-47	0.338776	4.73353e-43	0.217	0.039	0.178
ENSG00000184363	PKP3	Basal/Suprabasal	3.2717e-77	0.307747	1.19708e-72	0.206	0.028	0.178
ENSG00000083307	GRHL2	Basal/Suprabasal	1.65582e-68	0.333064	6.05848e-64	0.204	0.027	0.177
ENSG00000149809	TM7SF2	Basal/Suprabasal	1.90194e-29	0.371815	6.95901e-25	0.354	0.177	0.177
ENSG00000154274	C4orf19	Basal/Suprabasal	1.13975e-64	0.396502	4.17022e-60	0.264	0.087	0.177
ENSG00000162105	SHANK2	Basal/Suprabasal	2.06916e-91	0.347078	7.57086e-87	0.271	0.094	0.177
ENSG00000163501	IHH	Basal/Suprabasal	5.49731e-190	0.352256	2.01141e-185	0.179	0.002	0.177
ENSG00000176945	MUC20	Basal/Suprabasal	3.38074e-67	0.540174	1.23698e-62	0.206	0.029	0.177
ENSG00000197142	ACSL5	Basal/Suprabasal	9.13662e-130	0.387208	3.343e-125	0.189	0.012	0.177
ENSG00000198369	SPRED2	Basal/Suprabasal	5.02102e-44	0.407436	1.83714e-39	0.332	0.155	0.177
ENSG00000138162	TACC2	Basal/Suprabasal	3.12811e-195	0.543294	1.14454e-190	0.434	0.258	0.176
ENSG00000235448	LURAP1L-AS1	Basal/Suprabasal	1.79841e-42	0.369852	6.5802e-38	0.243	0.067	0.176
ENSG00000125848	FLRT3	Basal/Suprabasal	4.15833e-105	0.42886	1.52149e-100	0.242	0.067	0.175
ENSG00000090020	SLC9A1	Basal/Suprabasal	2.77814e-29	0.367422	1.01649e-24	0.29	0.117	0.173
ENSG00000132849	PATJ	Basal/Suprabasal	3.45942e-43	0.401355	1.26577e-38	0.459	0.286	0.173
ENSG00000084234	APLP2	Basal/Suprabasal	5.01926e-54	0.580745	1.8365e-49	0.709	0.537	0.172
ENSG00000163874	ZC3H12A	Basal/Suprabasal	2.08382e-07	0.305672	0.00762448	0.284	0.113	0.171
ENSG00000196954	CASP4	Basal/Suprabasal	1.91175e-27	0.340377	6.99491e-23	0.236	0.065	0.171
ENSG00000236975	LINC02814	Basal/Suprabasal	5.75461e-13	0.316135	2.10555e-08	0.297	0.126	0.171
ENSG00000076067	RBMS2	Basal/Suprabasal	3.93075e-48	0.359809	1.43822e-43	0.275	0.105	0.17
ENSG00000139793	MBNL2	Basal/Suprabasal	4.459e-55	0.541608	1.6315e-50	0.471	0.301	0.17
ENSG00000141232	TOB1	Basal/Suprabasal	1.3013e-32	0.390061	4.76132e-28	0.319	0.149	0.17
ENSG00000177570	SAMD12	Basal/Suprabasal	2.23743e-60	0.385658	8.18652e-56	0.295	0.125	0.17
ENSG00000205352	PRR13	Basal/Suprabasal	4.8444e-38	0.592247	1.77252e-33	0.642	0.472	0.17
ENSG00000130164	LDLR	Basal/Suprabasal	2.89426e-21	0.396835	1.05898e-16	0.351	0.182	0.169
ENSG00000078114	NEBL	Basal/Suprabasal	3.91788e-11	0.400517	1.43351e-06	0.244	0.076	0.168
ENSG00000111266	DUSP16	Basal/Suprabasal	3.86538e-52	0.499811	1.4143e-47	0.455	0.287	0.168
ENSG00000113811	SELENOK	Basal/Suprabasal	1.6537e-31	0.658071	6.05072e-27	0.712	0.544	0.168
ENSG00000141837	CACNA1A	Basal/Suprabasal	1.66578e-11	0.312447	6.09493e-07	0.429	0.261	0.168
ENSG00000116171	SCP2	Basal/Suprabasal	6.69544e-48	0.54848	2.4498e-43	0.582	0.415	0.167
ENSG00000138069	RAB1A	Basal/Suprabasal	2.19677e-36	0.521293	8.03777e-32	0.769	0.602	0.167
ENSG00000148488	ST8SIA6	Basal/Suprabasal	7.665e-104	0.322808	2.80455e-99	0.179	0.012	0.167
ENSG00000138449	SLC40A1	Basal/Suprabasal	1.03859e-54	0.370317	3.80009e-50	0.205	0.04	0.165
ENSG00000167315	ACAA2	Basal/Suprabasal	1.03469e-266	0.69423	3.78582e-262	0.649	0.484	0.165
ENSG00000167964	RAB26	Basal/Suprabasal	3.40926e-47	0.563924	1.24741e-42	0.408	0.243	0.165
ENSG00000257261	AC008014.1	Basal/Suprabasal	5.01556e-12	0.359839	1.83514e-07	0.276	0.111	0.165
ENSG00000006652	IFRD1	Basal/Suprabasal	2.22932e-71	0.593614	8.15687e-67	0.599	0.435	0.164
ENSG00000044574	HSPA5	Basal/Suprabasal	2.5156e-36	0.705441	9.20431e-32	0.766	0.602	0.164
ENSG00000115963	RND3	Basal/Suprabasal	9.64644e-08	0.548055	0.00352954	0.526	0.362	0.164
ENSG00000137261	KIAA0319	Basal/Suprabasal	3.8987e-105	0.375239	1.42649e-100	0.182	0.019	0.163
ENSG00000139865	TTC6	Basal/Suprabasal	3.1417e-42	0.31135	1.14952e-37	0.224	0.061	0.163
ENSG00000141505	ASGR1	Basal/Suprabasal	5.62469e-54	0.347878	2.05802e-49	0.232	0.069	0.163
ENSG00000153902	LGI4	Basal/Suprabasal	3.29829e-137	0.348563	1.20681e-132	0.168	0.005	0.163
ENSG00000144645	OSBPL10	Basal/Suprabasal	4.13685e-132	0.507658	1.51363e-127	0.365	0.203	0.162
ENSG00000162390	ACOT11	Basal/Suprabasal	1.68091e-97	0.312418	6.15029e-93	0.197	0.035	0.162
ENSG00000261183	SPINT1-AS1	Basal/Suprabasal	1.31558e-49	0.292647	4.81356e-45	0.188	0.026	0.162
ENSG00000287555	AC023424.3	Basal/Suprabasal	1.24366e-20	0.390546	4.55041e-16	0.327	0.165	0.162
ENSG00000006453	BAIAP2L1	Basal/Suprabasal	6.05418e-62	0.387669	2.21516e-57	0.31	0.149	0.161
ENSG00000142627	EPHA2	Basal/Suprabasal	1.39591e-81	0.327695	5.10751e-77	0.219	0.058	0.161
ENSG00000162236	STX5	Basal/Suprabasal	1.15301e-18	0.308363	4.21875e-14	0.365	0.204	0.161
ENSG00000162981	LRATD1	Basal/Suprabasal	4.74156e-94	0.34534	1.73489e-89	0.188	0.027	0.161
ENSG00000204387	SNHG32	Basal/Suprabasal	7.16384e-43	0.533831	2.62118e-38	0.832	0.672	0.16
ENSG00000211455	STK38L	Basal/Suprabasal	6.68587e-117	0.580935	2.44629e-112	0.363	0.203	0.16
ENSG00000253309	SERPINE3	Basal/Suprabasal	3.44405e-09	0.348278	0.000126014	0.263	0.104	0.159
ENSG00000100612	DHRS7	Basal/Suprabasal	2.22493e-44	0.456044	8.14079e-40	0.596	0.438	0.158
ENSG00000156171	DRAM2	Basal/Suprabasal	1.04005e-67	0.431288	3.80545e-63	0.454	0.296	0.158
ENSG00000227400	AC012501.2	Basal/Suprabasal	9.26416e-119	0.340831	3.38966e-114	0.184	0.026	0.158
ENSG00000053747	LAMA3	Basal/Suprabasal	8.73139e-82	0.413908	3.19473e-77	0.18	0.023	0.157
ENSG00000070759	TESK2	Basal/Suprabasal	4.71367e-35	0.333643	1.72468e-30	0.21	0.053	0.157
ENSG00000076944	STXBP2	Basal/Suprabasal	6.88211e-40	0.31678	2.5181e-35	0.254	0.097	0.157
ENSG00000177106	EPS8L2	Basal/Suprabasal	4.9649e-59	0.33009	1.81661e-54	0.276	0.119	0.157
ENSG00000236039	AC019117.1	Basal/Suprabasal	2.64916e-131	0.398361	9.69301e-127	0.169	0.012	0.157
ENSG00000113722	CDX1	Basal/Suprabasal	1.61333e-163	0.319293	5.90303e-159	0.165	0.009	0.156
ENSG00000103485	QPRT	Basal/Suprabasal	6.3404e-09	0.673289	0.000231989	0.87	0.716	0.154
ENSG00000103966	EHD4	Basal/Suprabasal	2.77001e-94	0.370742	1.01352e-89	0.259	0.105	0.154
ENSG00000157557	ETS2	Basal/Suprabasal	3.47344e-08	0.39361	0.0012709	0.389	0.235	0.154
ENSG00000238290	AL034417.2	Basal/Suprabasal	1.48701e-58	0.307151	5.44081e-54	0.175	0.021	0.154
ENSG00000251675	AC010260.1	Basal/Suprabasal	2.07908e-23	0.32126	7.60715e-19	0.224	0.07	0.154
ENSG00000275718	CCL15	Basal/Suprabasal	7.74372e-177	0.302605	2.83335e-172	0.155	0.001	0.154
ENSG00000135378	PRRG4	Basal/Suprabasal	3.67005e-25	0.296633	1.34283e-20	0.19	0.037	0.153
ENSG00000179674	ARL14	Basal/Suprabasal	2.6806e-146	0.42143	9.80806e-142	0.156	0.003	0.153
ENSG00000229056	HECW2-AS1	Basal/Suprabasal	5.3926e-140	0.277647	1.9731e-135	0.157	0.004	0.153
ENSG00000247925	AL139807.1	Basal/Suprabasal	1.42741e-48	0.329761	5.22274e-44	0.189	0.036	0.153
ENSG00000204308	RNF5	Basal/Suprabasal	7.53936e-56	0.48336	2.75858e-51	0.544	0.392	0.152
ENSG00000241484	ARHGAP8	Basal/Suprabasal	9.7761e-77	0.318641	3.57698e-72	0.256	0.104	0.152
ENSG00000128590	DNAJB9	Basal/Suprabasal	3.44552e-06	0.395927	0.126068	0.355	0.204	0.151
ENSG00000163660	CCNL1	Basal/Suprabasal	3.724e-07	0.515	0.0136257	0.669	0.518	0.151
ENSG00000251095	AC093866.1	Basal/Suprabasal	7.51025e-31	0.36595	2.74792e-26	0.209	0.058	0.151
ENSG00000081923	ATP8B1	Basal/Suprabasal	3.78905e-50	0.364901	1.38638e-45	0.249	0.099	0.15
ENSG00000136856	SLC2A8	Basal/Suprabasal	6.69274e-60	0.358603	2.44881e-55	0.3	0.15	0.15
ENSG00000181722	ZBTB20	Basal/Suprabasal	1.61843e-24	0.571734	5.92166e-20	0.551	0.401	0.15
ENSG00000122359	ANXA11	Basal/Suprabasal	4.37253e-29	0.40056	1.59987e-24	0.441	0.292	0.149
ENSG00000073803	MAP3K13	Basal/Suprabasal	5.05495e-53	0.597733	1.84956e-48	0.68	0.532	0.148
ENSG00000198758	EPS8L3	Basal/Suprabasal	2.28919e-170	0.28194	8.37593e-166	0.149	0.001	0.148
ENSG00000076554	TPD52	Basal/Suprabasal	3.93702e-155	0.459073	1.44052e-150	0.574	0.427	0.147
ENSG00000160213	CSTB	Basal/Suprabasal	4.73944e-248	1.09253	1.73411e-243	0.9	0.753	0.147
ENSG00000104765	BNIP3L	Basal/Suprabasal	2.04983e-19	0.401584	7.50013e-15	0.501	0.355	0.146
ENSG00000169562	GJB1	Basal/Suprabasal	9.71792e-158	0.272842	3.55569e-153	0.147	0.001	0.146
ENSG00000241224	C3orf85	Basal/Suprabasal	4.52458e-168	0.308304	1.6555e-163	0.147	0.001	0.146
ENSG00000086062	B4GALT1	Basal/Suprabasal	1.72604e-16	0.312462	6.31539e-12	0.324	0.179	0.145
ENSG00000141448	GATA6	Basal/Suprabasal	1.19722e-34	0.289799	4.3805e-30	0.198	0.053	0.145
ENSG00000242798	AC073842.2	Basal/Suprabasal	1.28651e-12	0.275273	4.70723e-08	0.259	0.115	0.144
ENSG00000260265	LINC02562	Basal/Suprabasal	7.68202e-81	0.266249	2.81077e-76	0.166	0.022	0.144
ENSG00000163362	INAVA	Basal/Suprabasal	7.02821e-101	0.281209	2.57155e-96	0.16	0.017	0.143
ENSG00000168615	ADAM9	Basal/Suprabasal	6.65635e-38	0.458193	2.43549e-33	0.388	0.245	0.143
ENSG00000170017	ALCAM	Basal/Suprabasal	7.3633e-26	0.278673	2.69416e-21	0.353	0.21	0.143
ENSG00000101608	MYL12A	Basal/Suprabasal	1.06491e-14	0.46791	3.89641e-10	0.797	0.655	0.142
ENSG00000119139	TJP2	Basal/Suprabasal	1.72931e-45	0.347499	6.32738e-41	0.25	0.108	0.142
ENSG00000131941	RHPN2	Basal/Suprabasal	2.60853e-119	0.383456	9.54437e-115	0.291	0.149	0.142
ENSG00000213213	CCDC183	Basal/Suprabasal	1.2285e-71	0.290318	4.49497e-67	0.189	0.047	0.142
ENSG00000050344	NFE2L3	Basal/Suprabasal	5.6133e-06	0.439365	0.205385	0.501	0.36	0.141
ENSG00000096092	TMEM14A	Basal/Suprabasal	8.86775e-11	0.302208	3.24462e-06	0.364	0.223	0.141
ENSG00000173702	MUC13	Basal/Suprabasal	1.39624e-143	0.431068	5.10871e-139	0.144	0.003	0.141
ENSG00000180611	MB21D2	Basal/Suprabasal	6.85447e-50	0.320462	2.50798e-45	0.214	0.073	0.141
ENSG00000067113	PLPP1	Basal/Suprabasal	6.90803e-17	0.417506	2.52758e-12	0.416	0.276	0.14
ENSG00000105856	HBP1	Basal/Suprabasal	2.97649e-13	0.297445	1.08907e-08	0.268	0.128	0.14
ENSG00000118137	APOA1	Basal/Suprabasal	4.45454e-146	0.828929	1.62987e-141	0.186	0.046	0.14
ENSG00000124440	HIF3A	Basal/Suprabasal	4.67827e-10	0.351014	1.71173e-05	0.313	0.173	0.14
ENSG00000143367	TUFT1	Basal/Suprabasal	3.98217e-55	0.286702	1.45704e-50	0.211	0.071	0.14
ENSG00000266010	GATA6-AS1	Basal/Suprabasal	3.43561e-74	0.258688	1.25705e-69	0.163	0.024	0.139
ENSG00000109062	SLC9A3R1	Basal/Suprabasal	6.14321e-110	0.337697	2.24774e-105	0.274	0.136	0.138
ENSG00000111679	PTPN6	Basal/Suprabasal	5.18457e-36	0.297604	1.89698e-31	0.211	0.073	0.138
ENSG00000135917	SLC19A3	Basal/Suprabasal	5.08073e-136	0.324729	1.85899e-131	0.191	0.053	0.138
ENSG00000188313	PLSCR1	Basal/Suprabasal	1.11218e-37	0.391543	4.06936e-33	0.339	0.201	0.138
ENSG00000116741	RGS2	Basal/Suprabasal	4.27724e-05	0.362176	1	0.29	0.153	0.137
ENSG00000120875	DUSP4	Basal/Suprabasal	2.66029e-06	0.297663	0.0973373	0.223	0.086	0.137
ENSG00000127824	TUBA4A	Basal/Suprabasal	5.85837e-24	0.298629	2.14352e-19	0.271	0.134	0.137
ENSG00000134769	DTNA	Basal/Suprabasal	4.04144e-32	0.797228	1.47872e-27	0.466	0.329	0.137
ENSG00000171747	LGALS4	Basal/Suprabasal	4.28475e-85	0.552038	1.56775e-80	0.151	0.014	0.137
ENSG00000174992	ZG16	Basal/Suprabasal	1.28299e-147	0.48829	4.69434e-143	0.138	0.001	0.137
ENSG00000204592	HLA-E	Basal/Suprabasal	1.33196e-69	0.262903	4.87352e-65	0.384	0.247	0.137
ENSG00000286339	Z99496.2	Basal/Suprabasal	5.07026e-16	0.382931	1.85516e-11	0.323	0.186	0.137
ENSG00000110628	SLC22A18	Basal/Suprabasal	9.37716e-43	0.287432	3.43101e-38	0.192	0.056	0.136
ENSG00000125538	IL1B	Basal/Suprabasal	2.6712e-44	0.295153	9.77365e-40	0.153	0.017	0.136
ENSG00000196428	TSC22D2	Basal/Suprabasal	2.05626e-63	0.481029	7.52365e-59	0.431	0.295	0.136
ENSG00000091409	ITGA6	Basal/Suprabasal	2.40749e-263	0.428047	8.80875e-259	0.32	0.185	0.135
ENSG00000118680	MYL12B	Basal/Suprabasal	7.32206e-55	0.743827	2.67907e-50	0.912	0.777	0.135
ENSG00000138670	RASGEF1B	Basal/Suprabasal	3.74947e-59	0.295551	1.37189e-54	0.171	0.036	0.135
ENSG00000143167	GPA33	Basal/Suprabasal	3.39645e-143	0.318696	1.24273e-138	0.139	0.004	0.135
ENSG00000283674	AC068587.4	Basal/Suprabasal	5.12658e-14	0.37204	1.87577e-09	0.353	0.218	0.135
ENSG00000120306	CYSTM1	Basal/Suprabasal	7.92569e-114	0.556887	2.89993e-109	0.671	0.537	0.134
ENSG00000148700	ADD3	Basal/Suprabasal	5.96451e-76	0.369923	2.18235e-71	0.356	0.222	0.134
ENSG00000177694	NAALADL2	Basal/Suprabasal	4.05246e-41	0.481724	1.48275e-36	0.343	0.209	0.134
ENSG00000183840	GPR39	Basal/Suprabasal	2.27816e-64	0.259248	8.33556e-60	0.152	0.018	0.134
ENSG00000259485	LINC02253	Basal/Suprabasal	6.69515e-119	0.363464	2.44969e-114	0.373	0.239	0.134
ENSG00000072201	LNX1	Basal/Suprabasal	7.91727e-49	0.250877	2.89685e-44	0.159	0.026	0.133
ENSG00000121310	ECHDC2	Basal/Suprabasal	1.25264e-41	0.290773	4.5833e-37	0.23	0.097	0.133
ENSG00000136943	CTSV	Basal/Suprabasal	1.53087e-105	0.274789	5.6013e-101	0.191	0.058	0.133
ENSG00000254166	CASC19	Basal/Suprabasal	7.52653e-90	0.261074	2.75388e-85	0.147	0.014	0.133
ENSG00000286016	AC079949.3	Basal/Suprabasal	1.95886e-134	0.250594	7.16725e-130	0.136	0.003	0.133
ENSG00000165171	METTL27	Basal/Suprabasal	1.0782e-68	0.272453	3.94502e-64	0.183	0.051	0.132
ENSG00000174938	SEZ6L2	Basal/Suprabasal	1.86643e-30	0.252143	6.82908e-26	0.346	0.214	0.132
ENSG00000112182	BACH2	Basal/Suprabasal	1.38994e-19	0.587036	5.08565e-15	0.375	0.244	0.131
ENSG00000118985	ELL2	Basal/Suprabasal	6.76826e-09	0.319167	0.000247644	0.316	0.185	0.131
ENSG00000120915	EPHX2	Basal/Suprabasal	7.3124e-127	0.343538	2.67554e-122	0.268	0.137	0.131
ENSG00000154447	SH3RF1	Basal/Suprabasal	1.21519e-77	0.425389	4.44626e-73	0.321	0.19	0.131
ENSG00000197892	KIF13B	Basal/Suprabasal	7.547e-54	0.316959	2.76137e-49	0.227	0.096	0.131
ENSG00000250337	PURPL	Basal/Suprabasal	1.42621e-19	0.312693	5.21835e-15	0.334	0.203	0.131
ENSG00000010626	LRRC23	Basal/Suprabasal	2.15345e-10	0.359464	7.87927e-06	0.362	0.232	0.13
ENSG00000108679	LGALS3BP	Basal/Suprabasal	2.99745e-07	0.353271	0.0109674	0.489	0.359	0.13
ENSG00000122884	P4HA1	Basal/Suprabasal	5.07442e-15	0.529581	1.85668e-10	0.729	0.599	0.13
ENSG00000150457	LATS2	Basal/Suprabasal	4.63749e-35	0.302805	1.69681e-30	0.212	0.082	0.13
ENSG00000161921	CXCL16	Basal/Suprabasal	1.28008e-39	0.25211	4.68368e-35	0.152	0.022	0.13
ENSG00000080224	EPHA6	Basal/Suprabasal	2.18277e-43	0.325809	7.98653e-39	0.236	0.107	0.129
ENSG00000135535	CD164	Basal/Suprabasal	5.06688e-24	0.44445	1.85392e-19	0.592	0.463	0.129
ENSG00000136603	SKIL	Basal/Suprabasal	2.26097e-17	0.312607	8.27265e-13	0.383	0.255	0.128
ENSG00000197279	ZNF165	Basal/Suprabasal	1.98935e-51	0.282224	7.27885e-47	0.153	0.025	0.128
ENSG00000058085	LAMC2	Basal/Suprabasal	4.54749e-31	0.324781	1.66388e-26	0.153	0.026	0.127
ENSG00000106392	C1GALT1	Basal/Suprabasal	6.95365e-74	0.363744	2.54427e-69	0.36	0.233	0.127
ENSG00000108846	ABCC3	Basal/Suprabasal	4.17101e-33	0.266217	1.52613e-28	0.152	0.025	0.127
ENSG00000134193	REG4	Basal/Suprabasal	1.48811e-123	0.47511	5.44486e-119	0.129	0.002	0.127
ENSG00000168575	SLC20A2	Basal/Suprabasal	2.32721e-176	0.630874	8.51502e-172	0.477	0.35	0.127
ENSG00000081320	STK17B	Basal/Suprabasal	1.11044e-26	0.312923	4.063e-22	0.259	0.133	0.126
ENSG00000105355	PLIN3	Basal/Suprabasal	4.5106e-22	0.299623	1.65038e-17	0.292	0.166	0.126
ENSG00000142867	BCL10	Basal/Suprabasal	1.90579e-38	0.338176	6.97308e-34	0.27	0.144	0.126
ENSG00000169242	EFNA1	Basal/Suprabasal	5.04025e-13	0.314179	1.84418e-08	0.231	0.105	0.126
ENSG00000181634	TNFSF15	Basal/Suprabasal	4.52638e-78	0.283838	1.65616e-73	0.134	0.008	0.126
ENSG00000149932	TMEM219	Basal/Suprabasal	5.43901e-14	0.383439	1.99008e-09	0.549	0.424	0.125
ENSG00000162645	GBP2	Basal/Suprabasal	1.48497e-15	0.275362	5.43337e-11	0.19	0.065	0.125
ENSG00000163898	LIPH	Basal/Suprabasal	1.08764e-79	0.309009	3.97958e-75	0.133	0.008	0.125
ENSG00000188257	PLA2G2A	Basal/Suprabasal	4.13634e-91	1.24138	1.51345e-86	0.13	0.005	0.125
ENSG00000206573	THUMPD3-AS1	Basal/Suprabasal	2.83835e-64	0.352683	1.03852e-59	0.621	0.496	0.125
ENSG00000082438	COBLL1	Basal/Suprabasal	3.08526e-59	0.395815	1.12887e-54	0.297	0.173	0.124
ENSG00000106546	AHR	Basal/Suprabasal	2.14997e-05	0.277918	0.786653	0.243	0.119	0.124
ENSG00000124766	SOX4	Basal/Suprabasal	8.73419e-29	0.77649	3.19575e-24	0.871	0.747	0.124
ENSG00000130822	PNCK	Basal/Suprabasal	6.86432e-195	0.532482	2.51159e-190	0.28	0.156	0.124
ENSG00000133816	MICAL2	Basal/Suprabasal	3.29803e-57	0.325564	1.20672e-52	0.247	0.123	0.124
ENSG00000180964	TCEAL8	Basal/Suprabasal	1.17775e-71	0.423223	4.30928e-67	0.777	0.653	0.124
ENSG00000184381	PLA2G6	Basal/Suprabasal	4.5006e-19	0.256834	1.64673e-14	0.195	0.071	0.124
ENSG00000121380	BCL2L14	Basal/Suprabasal	6.34612e-68	0.295365	2.32198e-63	0.247	0.124	0.123
ENSG00000141295	SCRN2	Basal/Suprabasal	3.87397e-52	0.276204	1.41745e-47	0.232	0.109	0.123
ENSG00000165527	ARF6	Basal/Suprabasal	6.50296e-38	0.430545	2.37937e-33	0.469	0.346	0.123
ENSG00000136153	LMO7	Basal/Suprabasal	1.70487e-15	0.25185	6.23795e-11	0.293	0.171	0.122
ENSG00000165929	TC2N	Basal/Suprabasal	1.45214e-45	0.252917	5.31323e-41	0.141	0.019	0.122
ENSG00000182648	LINC01006	Basal/Suprabasal	2.33704e-64	0.267912	8.551e-60	0.19	0.068	0.122
ENSG00000211445	GPX3	Basal/Suprabasal	1.37206e-13	0.29018	5.02022e-09	0.155	0.033	0.122
ENSG00000150991	UBC	Basal/Suprabasal	2.62483e-135	1.09357	9.60399e-131	0.975	0.854	0.121
ENSG00000160789	LMNA	Basal/Suprabasal	8.43155e-49	0.38974	3.08502e-44	0.552	0.431	0.121
ENSG00000186493	C5orf38	Basal/Suprabasal	3.63403e-71	0.253521	1.32966e-66	0.194	0.073	0.121
ENSG00000151150	ANK3	Basal/Suprabasal	1.00749e-29	0.328842	3.6863e-25	0.378	0.258	0.12
ENSG00000172493	AFF1	Basal/Suprabasal	7.70601e-65	0.440177	2.81955e-60	0.349	0.229	0.12
ENSG00000179820	MYADM	Basal/Suprabasal	3.21593e-20	0.29263	1.17668e-15	0.315	0.195	0.12
ENSG00000239305	RNF103	Basal/Suprabasal	4.59624e-18	0.269669	1.68172e-13	0.214	0.094	0.12
ENSG00000177311	ZBTB38	Basal/Suprabasal	9.9285e-11	0.265215	3.63274e-06	0.304	0.185	0.119
ENSG00000111816	FRK	Basal/Suprabasal	3.91862e-43	0.252412	1.43378e-38	0.135	0.017	0.118
ENSG00000165105	RASEF	Basal/Suprabasal	1.91099e-15	0.254034	6.99211e-11	0.184	0.066	0.118
ENSG00000257322	AC138123.1	Basal/Suprabasal	1.72971e-17	0.25324	6.32883e-13	0.23	0.112	0.118
ENSG00000099834	CDHR5	Basal/Suprabasal	6.829e-121	0.275403	2.49866e-116	0.119	0.002	0.117
ENSG00000100292	HMOX1	Basal/Suprabasal	0.00167647	0.269244	1	0.218	0.101	0.117
ENSG00000173926	MARCH3	Basal/Suprabasal	9.44687e-19	0.416067	3.45652e-14	0.276	0.159	0.117
ENSG00000257743	MGAM2	Basal/Suprabasal	2.05764e-105	0.269773	7.5287e-101	0.12	0.003	0.117
ENSG00000068745	IP6K2	Basal/Suprabasal	1.80404e-24	0.52963	6.60081e-20	0.68	0.564	0.116
ENSG00000110723	EXPH5	Basal/Suprabasal	2.17845e-31	0.320969	7.97075e-27	0.197	0.081	0.116
ENSG00000126522	ASL	Basal/Suprabasal	2.76891e-80	0.358197	1.01312e-75	0.302	0.186	0.116
ENSG00000006831	ADIPOR2	Basal/Suprabasal	1.75777e-53	0.434618	6.43149e-49	0.446	0.331	0.115
ENSG00000088808	PPP1R13B	Basal/Suprabasal	8.70095e-10	0.265545	3.18359e-05	0.216	0.101	0.115
ENSG00000100417	PMM1	Basal/Suprabasal	3.25905e-16	0.333594	1.19246e-11	0.422	0.308	0.114
ENSG00000113328	CCNG1	Basal/Suprabasal	2.94662e-52	0.705403	1.07814e-47	0.817	0.703	0.114
ENSG00000147526	TACC1	Basal/Suprabasal	3.03194e-29	0.337029	1.10936e-24	0.293	0.179	0.114
ENSG00000156976	EIF4A2	Basal/Suprabasal	0	1.49972	0	0.962	0.848	0.114
ENSG00000168883	USP39	Basal/Suprabasal	7.35557e-15	0.478086	2.69133e-10	0.597	0.483	0.114
ENSG00000170412	GPRC5C	Basal/Suprabasal	9.26126e-07	0.253583	0.033886	0.236	0.122	0.114
ENSG00000176171	BNIP3	Basal/Suprabasal	1.5591e-185	1.17273	5.70458e-181	0.978	0.864	0.114
ENSG00000196189	SEMA4A	Basal/Suprabasal	0.00905497	0.253504	1	0.182	0.068	0.114
ENSG00000204228	HSD17B8	Basal/Suprabasal	9.77099e-82	0.25872	3.57511e-77	0.221	0.107	0.114
ENSG00000272211	AC114760.2	Basal/Suprabasal	3.04188e-12	0.254609	1.11299e-07	0.159	0.045	0.114
ENSG00000281991	TMEM265	Basal/Suprabasal	8.32636e-11	0.254029	3.04653e-06	0.188	0.074	0.114
ENSG00000100461	RBM23	Basal/Suprabasal	1.74554e-33	0.356604	6.38674e-29	0.379	0.266	0.113
ENSG00000117305	HMGCL	Basal/Suprabasal	6.3368e-31	0.3359	2.31857e-26	0.379	0.266	0.113
ENSG00000184292	TACSTD2	Basal/Suprabasal	1.40395e-39	0.325335	5.1369e-35	0.128	0.015	0.113
ENSG00000079739	PGM1	Basal/Suprabasal	1.11303e-15	0.384795	4.07248e-11	0.528	0.416	0.112
ENSG00000236383	CCDC200	Basal/Suprabasal	1.70014e-37	0.497423	6.22063e-33	0.392	0.28	0.112
ENSG00000069020	MAST4	Basal/Suprabasal	2.2619e-29	0.351248	8.27607e-25	0.319	0.209	0.11
ENSG00000100345	MYH9	Basal/Suprabasal	8.27412e-25	0.330101	3.02742e-20	0.47	0.36	0.11
ENSG00000166483	WEE1	Basal/Suprabasal	9.59395e-66	0.375042	3.51033e-61	0.327	0.217	0.11
ENSG00000145247	OCIAD2	Basal/Suprabasal	1.52293e-23	0.294096	5.57225e-19	0.618	0.509	0.109
ENSG00000158201	ABHD3	Basal/Suprabasal	1.29709e-23	0.341956	4.74591e-19	0.291	0.182	0.109
ENSG00000161010	MRNIP	Basal/Suprabasal	3.78093e-73	0.501642	1.3834e-68	0.398	0.289	0.109
ENSG00000169905	TOR1AIP2	Basal/Suprabasal	8.90144e-28	0.37201	3.25695e-23	0.401	0.292	0.109
ENSG00000171552	BCL2L1	Basal/Suprabasal	1.46353e-06	0.327664	0.053549	0.369	0.26	0.109
ENSG00000086666	ZFAND6	Basal/Suprabasal	5.21499e-13	0.365102	1.90811e-08	0.555	0.447	0.108
ENSG00000103769	RAB11A	Basal/Suprabasal	1.44005e-38	0.596071	5.26901e-34	0.792	0.684	0.108
ENSG00000138771	SHROOM3	Basal/Suprabasal	1.34547e-26	0.43923	4.92293e-22	0.315	0.207	0.108
ENSG00000153113	CAST	Basal/Suprabasal	9.60236e-22	0.428457	3.51341e-17	0.59	0.482	0.108
ENSG00000159596	TMEM69	Basal/Suprabasal	1.03032e-83	0.337018	3.76982e-79	0.342	0.234	0.108
ENSG00000164300	SERINC5	Basal/Suprabasal	8.4219e-32	0.33102	3.08149e-27	0.31	0.202	0.108
ENSG00000198792	TMEM184B	Basal/Suprabasal	3.81172e-34	0.316528	1.39467e-29	0.25	0.142	0.108
ENSG00000240344	PPIL3	Basal/Suprabasal	7.35317e-28	0.324034	2.69045e-23	0.382	0.275	0.107
ENSG00000081059	TCF7	Basal/Suprabasal	4.03746e-26	0.268692	1.47727e-21	0.25	0.144	0.106
ENSG00000134531	EMP1	Basal/Suprabasal	1.05128e-30	0.270264	3.84652e-26	0.218	0.112	0.106
ENSG00000139354	GAS2L3	Basal/Suprabasal	7.15162e-59	0.313412	2.61671e-54	0.223	0.117	0.106
ENSG00000165475	CRYL1	Basal/Suprabasal	5.46431e-39	0.252498	1.99934e-34	0.208	0.102	0.106
ENSG00000184304	PRKD1	Basal/Suprabasal	8.73355e-13	0.301483	3.19552e-08	0.258	0.152	0.106
ENSG00000049860	HEXB	Basal/Suprabasal	1.30222e-13	0.353105	4.76468e-09	0.456	0.351	0.105
ENSG00000168374	ARF4	Basal/Suprabasal	9.48464e-79	0.416173	3.47034e-74	0.796	0.692	0.104
ENSG00000157214	STEAP2	Basal/Suprabasal	1.29591e-64	0.328403	4.7416e-60	0.185	0.082	0.103
ENSG00000046604	DSG2	Basal/Suprabasal	1.51312e-43	0.350862	5.53634e-39	0.375	0.274	0.101
ENSG00000127328	RAB3IP	Basal/Suprabasal	9.45e-24	0.275281	3.45766e-19	0.289	0.188	0.101
ENSG00000133935	ERG28	Basal/Suprabasal	0.00112784	0.33451	1	0.476	0.376	0.1
ENSG00000160932	LY6E	Basal/Suprabasal	0	2.18853	0	0.931	0.831	0.1
ENSG00000172893	DHCR7	Basal/Suprabasal	7.10913e-49	0.354336	2.60116e-44	0.398	0.299	0.099
ENSG00000013441	CLK1	Basal/Suprabasal	3.79391e-19	0.30867	1.38815e-14	0.397	0.299	0.098
ENSG00000163171	CDC42EP3	Basal/Suprabasal	7.20249e-14	0.326341	2.63532e-09	0.282	0.184	0.098
ENSG00000168264	IRF2BP2	Basal/Suprabasal	7.20841e-33	0.323471	2.63749e-28	0.378	0.28	0.098
ENSG00000044115	CTNNA1	Basal/Suprabasal	7.51436e-10	0.413872	2.74943e-05	0.58	0.483	0.097
ENSG00000102024	PLS3	Basal/Suprabasal	1.91749e-10	0.397594	7.01591e-06	0.494	0.397	0.097
ENSG00000119801	YPEL5	Basal/Suprabasal	2.5478e-46	0.250477	9.32215e-42	0.339	0.242	0.097
ENSG00000255112	CHMP1B	Basal/Suprabasal	1.29169e-13	0.291632	4.72618e-09	0.316	0.219	0.097
ENSG00000050405	LIMA1	Basal/Suprabasal	7.33932e-09	0.367368	0.000268539	0.511	0.415	0.096
ENSG00000183648	NDUFB1	Basal/Suprabasal	8.95674e-05	0.538013	1	0.834	0.738	0.096
ENSG00000083937	CHMP2B	Basal/Suprabasal	5.78479e-35	0.365874	2.1166e-30	0.437	0.342	0.095
ENSG00000125775	SDCBP2	Basal/Suprabasal	3.31578e-65	0.261315	1.21321e-60	0.139	0.044	0.095
ENSG00000213719	CLIC1	Basal/Suprabasal	1.63483e-166	0.858807	5.98168e-162	0.944	0.849	0.095
ENSG00000275342	PRAG1	Basal/Suprabasal	9.8187e-42	0.351022	3.59256e-37	0.299	0.204	0.095
ENSG00000125534	PPDPF	Basal/Suprabasal	1.30959e-33	0.733706	4.79165e-29	0.931	0.838	0.093
ENSG00000007255	TRAPPC6A	Basal/Suprabasal	2.0367e-68	0.341943	7.45208e-64	0.442	0.349	0.093
ENSG00000128422	KRT17	Basal/Suprabasal	1.50233e-09	0.691205	5.49686e-05	0.141	0.048	0.093
ENSG00000135046	ANXA1	Basal/Suprabasal	1.16992e-40	0.325853	4.28063e-36	0.244	0.152	0.092
ENSG00000109756	RAPGEF2	Basal/Suprabasal	1.31218e-66	0.399045	4.80113e-62	0.397	0.307	0.09
ENSG00000117139	KDM5B	Basal/Suprabasal	2.27133e-22	0.284191	8.31058e-18	0.418	0.328	0.09
ENSG00000101421	CHMP4B	Basal/Suprabasal	3.65463e-46	0.265449	1.33719e-41	0.45	0.361	0.089
ENSG00000165997	ARL5B	Basal/Suprabasal	7.12501e-28	0.268633	2.60697e-23	0.279	0.191	0.088
ENSG00000154556	SORBS2	Basal/Suprabasal	1.03284e-18	0.272495	3.77905e-14	0.324	0.238	0.086
ENSG00000173848	NET1	Basal/Suprabasal	1.49207e-31	0.282539	5.45933e-27	0.321	0.235	0.086
ENSG00000074527	NTN4	Basal/Suprabasal	5.64338e-18	0.283513	2.06485e-13	0.103	0.018	0.085
ENSG00000102786	INTS6	Basal/Suprabasal	5.7244e-10	0.331083	2.0945e-05	0.43	0.345	0.085
ENSG00000065154	OAT	Basal/Suprabasal	6.23714e-33	0.397181	2.28211e-28	0.416	0.332	0.084
ENSG00000109270	LAMTOR3	Basal/Suprabasal	8.17208e-20	0.288633	2.99008e-15	0.348	0.264	0.084
ENSG00000165006	UBAP1	Basal/Suprabasal	3.12052e-10	0.257318	1.14177e-05	0.34	0.256	0.084
ENSG00000166171	DPCD	Basal/Suprabasal	1.95738e-70	0.438158	7.16185e-66	0.584	0.5	0.084
ENSG00000182199	SHMT2	Basal/Suprabasal	4.62409e-198	0.468063	1.69191e-193	0.609	0.525	0.084
ENSG00000141959	PFKL	Basal/Suprabasal	3.92648e-38	0.324686	1.43666e-33	0.418	0.335	0.083
ENSG00000155850	SLC26A2	Basal/Suprabasal	1.53362e-65	0.266254	5.61135e-61	0.138	0.055	0.083
ENSG00000168952	STXBP6	Basal/Suprabasal	6.27285e-143	0.323558	2.29517e-138	0.408	0.325	0.083
ENSG00000008086	CDKL5	Basal/Suprabasal	1.59839e-31	0.256558	5.84833e-27	0.185	0.103	0.082
ENSG00000050426	LETMD1	Basal/Suprabasal	3.92199e-144	0.481895	1.43502e-139	0.592	0.51	0.082
ENSG00000185088	RPS27L	Basal/Suprabasal	0.00314672	0.687208	1	0.921	0.84	0.081
ENSG00000117472	TSPAN1	Basal/Suprabasal	9.00378e-33	0.350651	3.29439e-28	0.107	0.026	0.081
ENSG00000143198	MGST3	Basal/Suprabasal	2.12764e-71	0.656526	7.78484e-67	0.835	0.754	0.081
ENSG00000178974	FBXO34	Basal/Suprabasal	1.40899e-41	0.284211	5.15534e-37	0.28	0.199	0.081
ENSG00000106536	POU6F2	Basal/Suprabasal	3.7233e-34	0.278883	1.36232e-29	0.345	0.265	0.08
ENSG00000138413	IDH1	Basal/Suprabasal	3.70395e-25	0.268911	1.35524e-20	0.306	0.227	0.079
ENSG00000143252	SDHC	Basal/Suprabasal	5.8357e-49	0.43636	2.13522e-44	0.656	0.578	0.078
ENSG00000073792	IGF2BP2	Basal/Suprabasal	1.91099e-201	0.847762	6.99212e-197	0.832	0.754	0.078
ENSG00000144451	SPAG16	Basal/Suprabasal	2.1709e-40	0.285474	7.94311e-36	0.364	0.287	0.077
ENSG00000186591	UBE2H	Basal/Suprabasal	7.82839e-17	0.34074	2.86433e-12	0.401	0.324	0.077
ENSG00000052802	MSMO1	Basal/Suprabasal	5.53913e-07	0.37443	0.0202671	0.452	0.376	0.076
ENSG00000135968	GCC2	Basal/Suprabasal	4.52741e-71	0.343555	1.65653e-66	0.403	0.327	0.076
ENSG00000163900	TMEM41A	Basal/Suprabasal	5.5704e-25	0.280135	2.03815e-20	0.32	0.244	0.076
ENSG00000129422	MTUS1	Basal/Suprabasal	7.66228e-25	0.267768	2.80355e-20	0.283	0.208	0.075
ENSG00000136754	ABI1	Basal/Suprabasal	2.20075e-20	0.271462	8.05232e-16	0.282	0.207	0.075
ENSG00000170296	GABARAP	Basal/Suprabasal	0	0.33749	0	0.943	0.869	0.074
ENSG00000173065	FAM222B	Basal/Suprabasal	7.78689e-61	0.355037	2.84914e-56	0.351	0.277	0.074
ENSG00000162961	DPY30	Basal/Suprabasal	7.58678e-84	0.44111	2.77593e-79	0.646	0.574	0.072
ENSG00000106829	TLE4	Basal/Suprabasal	8.94795e-29	0.321116	3.27396e-24	0.38	0.308	0.072
ENSG00000139644	TMBIM6	Basal/Suprabasal	0.00625677	0.390294	1	0.817	0.745	0.072
ENSG00000185269	NOTUM	Basal/Suprabasal	6.05883e-48	0.258203	2.21687e-43	0.158	0.087	0.071
ENSG00000006042	TMEM98	Basal/Suprabasal	7.43255e-17	0.266104	2.7195e-12	0.531	0.462	0.069
ENSG00000114861	FOXP1	Basal/Suprabasal	3.66374e-35	0.406456	1.34053e-30	0.742	0.673	0.069
ENSG00000132669	RIN2	Basal/Suprabasal	8.2475e-32	0.294021	3.01768e-27	0.253	0.185	0.068
ENSG00000067064	IDI1	Basal/Suprabasal	0.00658065	0.279473	1	0.442	0.375	0.067
ENSG00000197329	PELI1	Basal/Suprabasal	1.71289e-11	0.319745	6.2673e-07	0.297	0.23	0.067
ENSG00000114023	FAM162A	Basal/Suprabasal	7.6921e-53	0.503175	2.81446e-48	0.894	0.829	0.065
ENSG00000173598	NUDT4	Basal/Suprabasal	3.5563e-42	0.258391	1.30121e-37	0.318	0.253	0.065
ENSG00000155660	PDIA4	Basal/Suprabasal	2.85223e-09	0.290248	0.00010436	0.437	0.373	0.064
ENSG00000204569	PPP1R10	Basal/Suprabasal	1.40691e-22	0.324464	5.14775e-18	0.426	0.362	0.064
ENSG00000155368	DBI	Basal/Suprabasal	3.93656e-148	0.639021	1.44035e-143	0.901	0.839	0.062
ENSG00000166233	ARIH1	Basal/Suprabasal	3.73053e-48	0.471825	1.36496e-43	0.658	0.596	0.062
ENSG00000177879	AP3S1	Basal/Suprabasal	6.17694e-35	0.312148	2.26008e-30	0.646	0.584	0.062
ENSG00000097033	SH3GLB1	Basal/Suprabasal	2.16891e-15	0.340025	7.93584e-11	0.497	0.435	0.062
ENSG00000197930	ERO1A	Basal/Suprabasal	3.28727e-06	0.313757	0.120278	0.489	0.427	0.062
ENSG00000108523	RNF167	Basal/Suprabasal	1.48034e-12	0.263553	5.41642e-08	0.406	0.345	0.061
ENSG00000134318	ROCK2	Basal/Suprabasal	4.54528e-121	0.417094	1.66307e-116	0.522	0.461	0.061
ENSG00000131018	SYNE1	Basal/Suprabasal	3.61012e-30	0.270245	1.32091e-25	0.274	0.214	0.06
ENSG00000089289	IGBP1	Basal/Suprabasal	1.10648e-111	0.496404	4.04849e-107	0.725	0.667	0.058
ENSG00000247134	AC090204.1	Basal/Suprabasal	3.046e-33	0.536566	1.1145e-28	0.859	0.801	0.058
ENSG00000166228	PCBD1	Basal/Suprabasal	8.70598e-146	0.380977	3.18543e-141	0.761	0.705	0.056
ENSG00000100997	ABHD12	Basal/Suprabasal	4.84787e-47	0.339283	1.77379e-42	0.411	0.355	0.056
ENSG00000116191	RALGPS2	Basal/Suprabasal	8.68358e-66	0.32434	3.17724e-61	0.31	0.254	0.056
ENSG00000116717	GADD45A	Basal/Suprabasal	0.00263437	0.250977	1	0.52	0.464	0.056
ENSG00000075142	SRI	Basal/Suprabasal	2.07941e-295	0.669666	7.60834e-291	0.844	0.788	0.056
ENSG00000132432	SEC61G	Basal/Suprabasal	1.30055e-119	0.504848	4.7586e-115	0.976	0.921	0.055
ENSG00000169895	SYAP1	Basal/Suprabasal	2.18638e-35	0.455682	7.99973e-31	0.698	0.643	0.055
ENSG00000092841	MYL6	Basal/Suprabasal	0	0.433344	0	0.994	0.94	0.054
ENSG00000167460	TPM4	Basal/Suprabasal	3.07662e-133	0.251647	1.1257e-128	0.732	0.678	0.054
ENSG00000168036	CTNNB1	Basal/Suprabasal	4.52465e-18	0.499628	1.65553e-13	0.59	0.536	0.054
ENSG00000145730	PAM	Basal/Suprabasal	9.38456e-06	0.268118	0.343372	0.637	0.584	0.053
ENSG00000151327	FAM177A1	Basal/Suprabasal	8.39508e-19	0.285992	3.07167e-14	0.522	0.469	0.053
ENSG00000196935	SRGAP1	Basal/Suprabasal	5.06153e-21	0.266853	1.85196e-16	0.337	0.285	0.052
ENSG00000129521	EGLN3	Basal/Suprabasal	8.64928e-24	0.284616	3.16468e-19	0.285	0.233	0.052
ENSG00000181467	RAP2B	Basal/Suprabasal	2.82651e-53	0.285784	1.03419e-48	0.275	0.223	0.052
ENSG00000102144	PGK1	Basal/Suprabasal	2.751e-47	0.818052	1.00656e-42	0.948	0.896	0.052
ENSG00000151914	DST	Basal/Suprabasal	5.67257e-106	0.547806	2.07554e-101	0.652	0.601	0.051
ENSG00000104805	NUCB1	Basal/Suprabasal	5.72897e-17	0.277335	2.09617e-12	0.451	0.4	0.051
ENSG00000066855	MTFR1	Basal/Suprabasal	1.76745e-55	0.30652	6.46693e-51	0.349	0.299	0.05
ENSG00000104325	DECR1	Basal/Suprabasal	3.38651e-33	0.327405	1.23909e-28	0.509	0.46	0.049
ENSG00000105568	PPP2R1A	Basal/Suprabasal	1.01167e-25	0.404395	3.70159e-21	0.646	0.597	0.049
ENSG00000116478	HDAC1	Basal/Suprabasal	7.28545e-56	0.270228	2.66567e-51	0.393	0.344	0.049
ENSG00000153006	SREK1IP1	Basal/Suprabasal	3.05265e-28	0.349777	1.11694e-23	0.522	0.474	0.048
ENSG00000165516	KLHDC2	Basal/Suprabasal	7.94192e-55	0.273892	2.90587e-50	0.367	0.32	0.047
ENSG00000079459	FDFT1	Basal/Suprabasal	1.11724e-42	0.333496	4.08788e-38	0.549	0.503	0.046
ENSG00000237877	LINC01473	Basal/Suprabasal	5.50955e-28	0.268422	2.01589e-23	0.38	0.334	0.046
ENSG00000217128	FNIP1	Basal/Suprabasal	1.70942e-102	0.251441	6.25459e-98	0.599	0.553	0.046
ENSG00000119048	UBE2B	Basal/Suprabasal	3.33168e-24	0.411508	1.21903e-19	0.686	0.642	0.044
ENSG00000140941	MAP1LC3B	Basal/Suprabasal	5.40266e-27	0.26782	1.97678e-22	0.546	0.502	0.044
ENSG00000159200	RCAN1	Basal/Suprabasal	2.29927e-22	0.263183	8.4128e-18	0.229	0.185	0.044
ENSG00000077380	DYNC1I2	Basal/Suprabasal	6.35782e-13	0.324308	2.32626e-08	0.572	0.528	0.044
ENSG00000134294	SLC38A2	Basal/Suprabasal	2.46739e-07	0.252468	0.00902792	0.411	0.368	0.043
ENSG00000137947	GTF2B	Basal/Suprabasal	6.41022e-30	0.271111	2.34544e-25	0.353	0.31	0.043
ENSG00000128272	ATF4	Basal/Suprabasal	1.29799e-07	0.40687	0.00474921	0.826	0.783	0.043
ENSG00000072401	UBE2D1	Basal/Suprabasal	6.54668e-15	0.250866	2.39536e-10	0.326	0.284	0.042
ENSG00000124596	OARD1	Basal/Suprabasal	7.47899e-82	0.298649	2.73649e-77	0.407	0.365	0.042
ENSG00000184900	SUMO3	Basal/Suprabasal	1.00896e-28	0.320326	3.6917e-24	0.51	0.468	0.042
ENSG00000188243	COMMD6	Basal/Suprabasal	0.000161853	0.682736	1	0.983	0.941	0.042
ENSG00000123562	MORF4L2	Basal/Suprabasal	6.72775e-150	0.36379	2.46162e-145	0.958	0.916	0.042
ENSG00000183978	COA3	Basal/Suprabasal	1.62491e-54	0.364489	5.9454e-50	0.57	0.528	0.042
ENSG00000125356	NDUFA1	Basal/Suprabasal	2.92473e-13	0.494099	1.07013e-08	0.904	0.863	0.041
ENSG00000205581	HMGN1	Basal/Suprabasal	7.28654e-115	0.809407	2.66607e-110	0.949	0.908	0.041
ENSG00000112335	SNX3	Basal/Suprabasal	2.22993e-56	0.386418	8.15909e-52	0.875	0.835	0.04
ENSG00000136888	ATP6V1G1	Basal/Suprabasal	5.7596e-43	0.288089	2.10738e-38	0.901	0.862	0.039
ENSG00000087884	AAMDC	Basal/Suprabasal	3.42349e-15	0.251489	1.25262e-10	0.427	0.389	0.038
ENSG00000120889	TNFRSF10B	Basal/Suprabasal	0.000587931	0.250584	1	0.426	0.388	0.038
ENSG00000198898	CAPZA2	Basal/Suprabasal	9.59543e-48	0.402652	3.51087e-43	0.623	0.585	0.038
ENSG00000086598	TMED2	Basal/Suprabasal	1.0753e-72	0.276417	3.93442e-68	0.704	0.667	0.037
ENSG00000102804	TSC22D1	Basal/Suprabasal	3.34674e-07	0.378823	0.0122454	0.649	0.613	0.036
ENSG00000168002	POLR2G	Basal/Suprabasal	2.25574e-11	0.312138	8.25354e-07	0.612	0.576	0.036
ENSG00000008952	SEC62	Basal/Suprabasal	3.07122e-48	0.293874	1.12373e-43	0.746	0.712	0.034
ENSG00000106853	PTGR1	Basal/Suprabasal	3.74105e-71	0.301259	1.36881e-66	0.466	0.432	0.034
ENSG00000125868	DSTN	Basal/Suprabasal	2.45144e-120	0.347495	8.96956e-116	0.934	0.901	0.033
ENSG00000132475	H3F3B	Basal/Suprabasal	5.89099e-73	1.13115	2.15545e-68	0.997	0.964	0.033
ENSG00000160584	SIK3	Basal/Suprabasal	1.83037e-95	0.454513	6.69712e-91	0.641	0.608	0.033
ENSG00000188186	LAMTOR4	Basal/Suprabasal	1.82438e-60	0.440438	6.67524e-56	0.866	0.833	0.033
ENSG00000102309	PIN4	Basal/Suprabasal	1.33444e-21	0.309518	4.8826e-17	0.534	0.502	0.032
ENSG00000130340	SNX9	Basal/Suprabasal	6.36938e-13	0.283029	2.33049e-08	0.413	0.381	0.032
ENSG00000198087	CD2AP	Basal/Suprabasal	1.91469e-68	0.27717	7.00564e-64	0.376	0.344	0.032
ENSG00000008405	CRY1	Basal/Suprabasal	8.253e-40	0.298845	3.01969e-35	0.392	0.361	0.031
ENSG00000139684	ESD	Basal/Suprabasal	5.85461e-196	0.505129	2.14214e-191	0.872	0.841	0.031
ENSG00000163110	PDLIM5	Basal/Suprabasal	1.67373e-27	0.315526	6.12402e-23	0.417	0.387	0.03
ENSG00000112695	COX7A2	Basal/Suprabasal	3.22976e-42	0.727209	1.18174e-37	0.995	0.966	0.029
ENSG00000125991	ERGIC3	Basal/Suprabasal	3.44191e-19	0.388244	1.25936e-14	0.737	0.708	0.029
ENSG00000160014	CALM3	Basal/Suprabasal	1.41348e-18	0.405586	5.17178e-14	0.724	0.695	0.029
ENSG00000102393	GLA	Basal/Suprabasal	4.66061e-56	0.310891	1.70527e-51	0.263	0.235	0.028
ENSG00000133872	SARAF	Basal/Suprabasal	2.29195e-16	0.288919	8.38603e-12	0.664	0.636	0.028
ENSG00000105379	ETFB	Basal/Suprabasal	1.73746e-102	0.406379	6.35721e-98	0.707	0.679	0.028
ENSG00000185787	MORF4L1	Basal/Suprabasal	0.000160874	0.46868	1	0.911	0.884	0.027
ENSG00000099797	TECR	Basal/Suprabasal	1.25619e-136	0.356626	4.59626e-132	0.672	0.646	0.026
ENSG00000169223	LMAN2	Basal/Suprabasal	7.18077e-06	0.309401	0.262737	0.673	0.648	0.025
ENSG00000181061	HIGD1A	Basal/Suprabasal	1.36614e-08	0.250507	0.000499856	0.389	0.364	0.025
ENSG00000091947	TMEM101	Basal/Suprabasal	2.69417e-55	0.289198	9.85771e-51	0.502	0.478	0.024
ENSG00000143933	CALM2	Basal/Suprabasal	1.11036e-09	0.544145	4.06271e-05	0.959	0.937	0.022
ENSG00000035403	VCL	Basal/Suprabasal	1.49688e-19	0.308685	5.47692e-15	0.452	0.432	0.02
ENSG00000065518	NDUFB4	Basal/Suprabasal	3.08331e-38	0.428223	1.12815e-33	0.862	0.842	0.02
ENSG00000086065	CHMP5	Basal/Suprabasal	5.5155e-18	0.307306	2.01807e-13	0.556	0.536	0.02
ENSG00000111229	ARPC3	Basal/Suprabasal	1.92164e-07	0.308045	0.00703108	0.878	0.86	0.018
ENSG00000111669	TPI1	Basal/Suprabasal	1.59491e-06	0.62823	0.0583562	0.997	0.979	0.018
ENSG00000233016	SNHG7	Basal/Suprabasal	0	0.771572	0	0.975	0.957	0.018
ENSG00000101558	VAPA	Basal/Suprabasal	1.77591e-07	0.319262	0.00649786	0.763	0.746	0.017
ENSG00000189043	NDUFA4	Basal/Suprabasal	8.39219e-38	0.310075	3.07062e-33	0.979	0.962	0.017
ENSG00000084207	GSTP1	Basal/Suprabasal	4.81676e-302	0.509853	1.7624e-297	0.998	0.983	0.015
ENSG00000156411	ATP5MPL	Basal/Suprabasal	1.04019e-21	0.360879	3.80595e-17	0.984	0.969	0.015
ENSG00000134333	LDHA	Basal/Suprabasal	3.96608e-61	0.647477	1.45115e-56	0.994	0.98	0.014
ENSG00000150459	SAP18	Basal/Suprabasal	5.89987e-119	0.405998	2.1587e-114	0.91	0.896	0.014
ENSG00000127184	COX7C	Basal/Suprabasal	0	0.869743	0	1	0.988	0.012
ENSG00000115866	DARS	Basal/Suprabasal	2.61064e-110	0.333615	9.55207e-106	0.7	0.689	0.011
ENSG00000140319	SRP14	Basal/Suprabasal	3.36079e-33	0.254286	1.22968e-28	0.988	0.978	0.01
ENSG00000173812	EIF1	Basal/Suprabasal	4.34462e-83	0.45885	1.58965e-78	1	0.99	0.01
ENSG00000183291	SELENOF	Basal/Suprabasal	1.64575e-11	0.282759	6.02162e-07	0.608	0.598	0.01
ENSG00000008988	RPS20	Basal/Suprabasal	8.5286e-31	0.694851	3.12053e-26	0.999	0.99	0.009
ENSG00000185043	CIB1	Basal/Suprabasal	8.89585e-22	0.274615	3.2549e-17	0.459	0.45	0.009
ENSG00000203875	SNHG5	Basal/Suprabasal	2.77234e-171	0.895488	1.01437e-166	0.998	0.989	0.009
ENSG00000100528	CNIH1	Basal/Suprabasal	3.0973e-09	0.263372	0.000113327	0.601	0.593	0.008
ENSG00000143183	TMCO1	Basal/Suprabasal	7.41794e-22	0.262863	2.71415e-17	0.636	0.628	0.008
ENSG00000067225	PKM	Basal/Suprabasal	1.48367e-46	0.451175	5.42861e-42	0.971	0.964	0.007
ENSG00000075624	ACTB	Basal/Suprabasal	7.8533e-159	0.32503	2.87345e-154	0.997	0.99	0.007
ENSG00000124486	USP9X	Basal/Suprabasal	1.83845e-25	0.35632	6.7267e-21	0.591	0.584	0.007
ENSG00000234741	GAS5	Basal/Suprabasal	0	1.39698	0	0.999	0.992	0.007
ENSG00000135486	HNRNPA1	Basal/Suprabasal	7.58093e-113	0.417546	2.77379e-108	0.99	0.984	0.006
ENSG00000197728	RPS26	Basal/Suprabasal	9.0866e-196	0.26672	3.3247e-191	0.999	0.993	0.006
ENSG00000071082	RPL31	Basal/Suprabasal	0	1.5895	0	0.999	0.994	0.005
ENSG00000087086	FTL	Basal/Suprabasal	3.79479e-06	0.99256	0.138847	1	0.995	0.005
ENSG00000147604	RPL7	Basal/Suprabasal	0	1.19236	0	1	0.995	0.005
ENSG00000175061	SNHG29	Basal/Suprabasal	0	0.523372	0	1	0.995	0.005
ENSG00000177410	ZFAS1	Basal/Suprabasal	0	0.948764	0	0.999	0.994	0.005
ENSG00000240972	MIF	Basal/Suprabasal	1.15056e-21	0.294482	4.20977e-17	1	0.995	0.005
ENSG00000122033	MTIF3	Basal/Suprabasal	2.77426e-38	0.270569	1.01508e-33	0.457	0.453	0.004
ENSG00000131051	RBM39	Basal/Suprabasal	1.23087e-28	0.373863	4.50363e-24	0.883	0.879	0.004
ENSG00000143420	ENSA	Basal/Suprabasal	9.48186e-20	0.317075	3.46932e-15	0.657	0.654	0.003
ENSG00000170315	UBB	Basal/Suprabasal	8.53075e-11	0.259919	3.12131e-06	0.972	0.969	0.003
ENSG00000172809	RPL38	Basal/Suprabasal	3.59003e-29	0.303744	1.31356e-24	1	0.997	0.003
ENSG00000177954	RPS27	Basal/Suprabasal	7.02551e-176	0.901252	2.57056e-171	1	0.997	0.003
ENSG00000182774	RPS17	Basal/Suprabasal	2.54779e-162	0.946738	9.3221e-158	1	0.997	0.003
ENSG00000198242	RPL23A	Basal/Suprabasal	6.23872e-210	0.497276	2.28269e-205	1	0.997	0.003
ENSG00000198755	RPL10A	Basal/Suprabasal	1.34842e-125	0.372772	4.93373e-121	0.999	0.996	0.003
ENSG00000241343	RPL36A	Basal/Suprabasal	0	0.780561	0	1	0.997	0.003
ENSG00000254772	EEF1G	Basal/Suprabasal	0	0.542209	6.78256e-305	1	0.997	0.003
ENSG00000074800	ENO1	Basal/Suprabasal	9.76592e-122	0.53617	3.57325e-117	0.99	0.988	0.002
ENSG00000089157	RPLP0	Basal/Suprabasal	1.50944e-225	0.562301	5.52289e-221	1	0.998	0.002
ENSG00000104408	EIF3E	Basal/Suprabasal	0	0.936798	0	0.977	0.975	0.002
ENSG00000122026	RPL21	Basal/Suprabasal	1.24603e-205	0.425043	4.55909e-201	1	0.998	0.002
ENSG00000136942	RPL35	Basal/Suprabasal	0	0.276217	0	1	0.998	0.002
ENSG00000142541	RPL13A	Basal/Suprabasal	1.00634e-100	1.23644	3.6821e-96	1	0.998	0.002
ENSG00000147403	RPL10	Basal/Suprabasal	4.44168e-61	0.262074	1.62517e-56	1	0.998	0.002
ENSG00000168288	MMADHC	Basal/Suprabasal	3.15983e-28	0.257032	1.15615e-23	0.505	0.503	0.002
ENSG00000169564	PCBP1	Basal/Suprabasal	2.98227e-26	0.324614	1.09118e-21	0.78	0.778	0.002
ENSG00000197756	RPL37A	Basal/Suprabasal	1.59292e-26	0.267372	5.82832e-22	1	0.998	0.002
ENSG00000198918	RPL39	Basal/Suprabasal	0	1.2041	0	1	0.998	0.002
ENSG00000213741	RPS29	Basal/Suprabasal	0	0.670124	0	1	0.998	0.002
ENSG00000214078	CPNE1	Basal/Suprabasal	5.73551e-29	0.273943	2.09857e-24	0.537	0.535	0.002
ENSG00000251562	MALAT1	Basal/Suprabasal	8.97804e-09	1.01916	0.000328497	1	0.998	0.002
ENSG00000109475	RPL34	Basal/Suprabasal	0	0.917364	0	1	0.999	0.001
ENSG00000137154	RPS6	Basal/Suprabasal	0	0.56106	0	1	0.999	0.001
ENSG00000164587	RPS14	Basal/Suprabasal	0	0.295486	0	1	0.999	0.001
ENSG00000177600	RPLP2	Basal/Suprabasal	1.12261e-187	0.394394	4.1075e-183	1	0.999	0.001
ENSG00000198034	RPS4X	Basal/Suprabasal	7.73422e-122	0.400865	2.82987e-117	1	0.999	0.001
ENSG00000229117	RPL41	Basal/Suprabasal	3.62274e-230	0.621643	1.32552e-225	1	0.999	0.001
ENSG00000265681	RPL17	Basal/Suprabasal	3.21496e-226	0.257573	1.17632e-221	1	0.999	0.001
ENSG00000062194	GPBP1	Basal/Suprabasal	9.70964e-32	0.305136	3.55266e-27	0.601	0.602	-0.001
ENSG00000113558	SKP1	Basal/Suprabasal	5.91145e-15	0.341348	2.16294e-10	0.898	0.9	-0.002
ENSG00000118363	SPCS2	Basal/Suprabasal	5.17466e-09	0.316453	0.000189336	0.749	0.753	-0.004
ENSG00000197321	SVIL	Basal/Suprabasal	2.46298e-26	0.264982	9.01181e-22	0.391	0.395	-0.004
ENSG00000065809	FAM107B	Basal/Suprabasal	1.87227e-14	0.263338	6.85045e-10	0.365	0.37	-0.005
ENSG00000114503	NCBP2	Basal/Suprabasal	7.13051e-79	0.261769	2.60898e-74	0.492	0.499	-0.007
ENSG00000117691	NENF	Basal/Suprabasal	0.00107712	0.355862	1	0.833	0.84	-0.007
ENSG00000054148	PHPT1	Basal/Suprabasal	2.02634e-05	0.254446	0.741417	0.918	0.929	-0.011
ENSG00000272047	GTF2H5	Basal/Suprabasal	1.4388e-20	0.255924	5.26441e-16	0.557	0.569	-0.012
ENSG00000166295	ANAPC16	Basal/Suprabasal	1.19786e-10	0.315024	4.38286e-06	0.768	0.781	-0.013
ENSG00000168118	RAB4A	Basal/Suprabasal	3.70392e-100	0.290247	1.35523e-95	0.637	0.65	-0.013
ENSG00000130770	ATP5IF1	Basal/Suprabasal	2.23038e-56	0.269627	8.16075e-52	0.867	0.881	-0.014
ENSG00000164924	YWHAZ	Basal/Suprabasal	1.24824e-22	0.291034	4.56719e-18	0.745	0.76	-0.015
ENSG00000111666	CHPT1	Basal/Suprabasal	4.7027e-84	0.266169	1.72067e-79	0.553	0.569	-0.016
ENSG00000197696	NMB	Basal/Suprabasal	4.62845e-46	0.312951	1.6935e-41	0.205	0.223	-0.018
ENSG00000168172	HOOK3	Basal/Suprabasal	2.17889e-50	0.267926	7.97233e-46	0.377	0.401	-0.024
ENSG00000125870	SNRPB2	Basal/Suprabasal	5.33334e-55	0.276379	1.95142e-50	0.783	0.814	-0.031
ENSG00000136527	TRA2B	Basal/Suprabasal	1.94036e-17	0.276836	7.09958e-13	0.598	0.637	-0.039
ENSG00000196591	HDAC2	Basal/Suprabasal	1.83043e-72	0.278216	6.69735e-68	0.719	0.765	-0.046
ENSG00000164104	HMGB2	Basal/Suprabasal	6.75578e-101	0.36768	2.47187e-96	0.481	0.557	-0.076
ENSG00000100097	LGALS1	Fibroblast	0	5.1952	0	0.933	0.077	0.856
ENSG00000108821	COL1A1	Fibroblast	0	4.51945	0	0.955	0.117	0.838
ENSG00000168542	COL3A1	Fibroblast	0	3.65598	0	0.952	0.121	0.831
ENSG00000164692	COL1A2	Fibroblast	0	3.74991	0	0.932	0.106	0.826
ENSG00000087245	MMP2	Fibroblast	0	2.32199	0	0.856	0.053	0.803
ENSG00000142173	COL6A2	Fibroblast	0	2.98291	0	0.881	0.085	0.796
ENSG00000130635	COL5A1	Fibroblast	0	2.29264	0	0.837	0.048	0.789
ENSG00000166741	NNMT	Fibroblast	0	2.57413	0	0.761	0.023	0.738
ENSG00000148344	PTGES	Fibroblast	0	2.20524	0	0.799	0.062	0.737
ENSG00000141753	IGFBP4	Fibroblast	0	2.28001	0	0.843	0.108	0.735
ENSG00000204262	COL5A2	Fibroblast	0	1.85267	0	0.813	0.082	0.731
ENSG00000198832	SELENOM	Fibroblast	0	1.86949	0	0.837	0.117	0.72
ENSG00000113140	SPARC	Fibroblast	0	3.66757	0	0.962	0.262	0.7
ENSG00000101335	MYL9	Fibroblast	0	2.36561	0	0.774	0.085	0.689
ENSG00000106333	PCOLCE	Fibroblast	0	1.74625	0	0.789	0.102	0.687
ENSG00000142156	COL6A1	Fibroblast	0	2.44138	0	0.826	0.145	0.681
ENSG00000172638	EFEMP2	Fibroblast	0	1.50861	0	0.775	0.095	0.68
ENSG00000185565	LSAMP	Fibroblast	0	1.855	0	0.9	0.221	0.679
ENSG00000163359	COL6A3	Fibroblast	0	1.65028	0	0.7	0.029	0.671
ENSG00000120708	TGFBI	Fibroblast	0	1.9428	0	0.752	0.085	0.667
ENSG00000137331	IER3	Fibroblast	0	2.76775	0	0.866	0.207	0.659
ENSG00000154096	THY1	Fibroblast	0	1.80022	0	0.692	0.049	0.643
ENSG00000185201	IFITM2	Fibroblast	0	1.77405	0	0.768	0.127	0.641
ENSG00000115414	FN1	Fibroblast	0	2.34115	0	0.82	0.183	0.637
ENSG00000130203	APOE	Fibroblast	0	2.91428	0	0.923	0.294	0.629
ENSG00000139329	LUM	Fibroblast	0	2.26132	0	0.683	0.067	0.616
ENSG00000145824	CXCL14	Fibroblast	0	3.44169	0	0.789	0.174	0.615
ENSG00000103196	CRISPLD2	Fibroblast	0	1.71911	0	0.756	0.145	0.611
ENSG00000116774	OLFML3	Fibroblast	0	1.27958	0	0.668	0.058	0.61
ENSG00000142227	EMP3	Fibroblast	0	1.41178	0	0.885	0.276	0.609
ENSG00000149257	SERPINH1	Fibroblast	0	1.93875	0	0.927	0.322	0.605
ENSG00000140682	TGFB1I1	Fibroblast	0	1.2201	0	0.641	0.04	0.601
ENSG00000144802	NFKBIZ	Fibroblast	0	1.41888	0	0.687	0.106	0.581
ENSG00000102265	TIMP1	Fibroblast	0	3.10895	0	0.935	0.359	0.576
ENSG00000091986	CCDC80	Fibroblast	0	1.69308	0	0.626	0.055	0.571
ENSG00000120738	EGR1	Fibroblast	1.87012e-83	1.25106	6.8426e-79	0.835	0.264	0.571
ENSG00000134013	LOXL2	Fibroblast	0	1.29053	0	0.616	0.052	0.564
ENSG00000149131	SERPING1	Fibroblast	0	1.11701	0	0.59	0.027	0.563
ENSG00000166033	HTRA1	Fibroblast	0	1.94848	0	0.682	0.126	0.556
ENSG00000197747	S100A10	Fibroblast	1.94048e-126	0.81374	7.10003e-122	0.929	0.376	0.553
ENSG00000011465	DCN	Fibroblast	0	3.09869	0	0.627	0.075	0.552
ENSG00000081041	CXCL2	Fibroblast	0	2.18148	0	0.61	0.059	0.551
ENSG00000176046	NUPR1	Fibroblast	0	1.29638	0	0.595	0.045	0.55
ENSG00000162576	MXRA8	Fibroblast	0	1.11107	0	0.657	0.109	0.548
ENSG00000182752	PAPPA	Fibroblast	0	1.44885	0	0.567	0.021	0.546
ENSG00000128016	ZFP36	Fibroblast	3.7086e-133	1.46133	1.35694e-128	0.739	0.196	0.543
ENSG00000163430	FSTL1	Fibroblast	0	1.24527	0	0.699	0.157	0.542
ENSG00000060718	COL11A1	Fibroblast	0	1.26096	0	0.637	0.096	0.541
ENSG00000159403	C1R	Fibroblast	0	1.22254	0	0.552	0.012	0.54
ENSG00000256235	SMIM3	Fibroblast	0	1.25097	0	0.662	0.13	0.532
ENSG00000152661	GJA1	Fibroblast	0	1.22231	0	0.714	0.183	0.531
ENSG00000255248	MIR100HG	Fibroblast	0	1.30582	0	0.702	0.176	0.526
ENSG00000158747	NBL1	Fibroblast	0	1.85816	0	0.633	0.108	0.525
ENSG00000118503	TNFAIP3	Fibroblast	0	1.34826	0	0.566	0.042	0.524
ENSG00000142089	IFITM3	Fibroblast	0	2.73492	0	0.961	0.44	0.521
ENSG00000011028	MRC2	Fibroblast	0	1.05266	0	0.611	0.093	0.518
ENSG00000122691	TWIST1	Fibroblast	0	0.943528	0	0.654	0.138	0.516
ENSG00000163191	S100A11	Fibroblast	1.37624e-173	1.34382	5.03552e-169	0.975	0.46	0.515
ENSG00000164733	CTSB	Fibroblast	0	1.30889	0	0.821	0.306	0.515
ENSG00000103145	HCFC1R1	Fibroblast	0	1.62588	0	0.797	0.283	0.514
ENSG00000117122	MFAP2	Fibroblast	0	1.21041	0	0.68	0.166	0.514
ENSG00000181458	TMEM45A	Fibroblast	0	1.03774	1.93389e-306	0.675	0.161	0.514
ENSG00000087074	PPP1R15A	Fibroblast	1.96998e-107	1.35085	7.20797e-103	0.857	0.344	0.513
ENSG00000162849	KIF26B	Fibroblast	0	1.66602	0	0.713	0.2	0.513
ENSG00000166482	MFAP4	Fibroblast	0	1.32277	0	0.562	0.052	0.51
ENSG00000189067	LITAF	Fibroblast	8.8777e-270	1.16197	3.24826e-265	0.691	0.181	0.51
ENSG00000119632	IFI27L2	Fibroblast	6.81922e-240	0.989827	2.49508e-235	0.711	0.202	0.509
ENSG00000169851	PCDH7	Fibroblast	0	1.19059	0	0.666	0.157	0.509
ENSG00000078098	FAP	Fibroblast	0	1.01212	0	0.567	0.062	0.505
ENSG00000100234	TIMP3	Fibroblast	0	1.90196	0	0.661	0.157	0.504
ENSG00000196549	MME	Fibroblast	0	1.01168	0	0.534	0.031	0.503
ENSG00000100906	NFKBIA	Fibroblast	0	2.38101	0	0.882	0.381	0.501
ENSG00000077942	FBLN1	Fibroblast	0	1.60669	0	0.755	0.256	0.499
ENSG00000187479	C11orf96	Fibroblast	0	1.83054	0	0.557	0.058	0.499
ENSG00000183087	GAS6	Fibroblast	0	1.4059	0	0.632	0.134	0.498
ENSG00000187260	WDR86	Fibroblast	0	0.934101	0	0.541	0.043	0.498
ENSG00000221869	CEBPD	Fibroblast	1.8439e-235	1.52461	6.74664e-231	0.795	0.297	0.498
ENSG00000011422	PLAUR	Fibroblast	0	1.06017	0	0.57	0.076	0.494
ENSG00000104368	PLAT	Fibroblast	0	1.3771	0	0.532	0.039	0.493
ENSG00000099860	GADD45B	Fibroblast	1.45049e-219	1.18307	5.30719e-215	0.632	0.141	0.491
ENSG00000157514	TSC22D3	Fibroblast	0	1.73864	0	0.748	0.257	0.491
ENSG00000141526	SLC16A3	Fibroblast	3.07985e-99	1.22821	1.12689e-94	0.772	0.283	0.489
ENSG00000130508	PXDN	Fibroblast	0	0.978569	0	0.634	0.148	0.486
ENSG00000140937	CDH11	Fibroblast	0	0.916128	0	0.558	0.073	0.485
ENSG00000170955	CAVIN3	Fibroblast	0	0.943728	0	0.59	0.112	0.478
ENSG00000162496	DHRS3	Fibroblast	0	1.28344	0	0.663	0.187	0.476
ENSG00000123610	TNFAIP6	Fibroblast	0	1.4867	0	0.495	0.02	0.475
ENSG00000119655	NPC2	Fibroblast	1.68136e-272	1.57479	6.15193e-268	0.93	0.456	0.474
ENSG00000121410	A1BG	Fibroblast	0	0.94812	0	0.693	0.219	0.474
ENSG00000171408	PDE7B	Fibroblast	0	1.02907	0	0.505	0.031	0.474
ENSG00000107796	ACTA2	Fibroblast	0	1.9192	0	0.582	0.109	0.473
ENSG00000196923	PDLIM7	Fibroblast	0	1.13799	0	0.705	0.234	0.471
ENSG00000173068	BNC2	Fibroblast	0	1.00054	0	0.639	0.169	0.47
ENSG00000120129	DUSP1	Fibroblast	9.26317e-21	0.97484	3.3893e-16	0.764	0.295	0.469
ENSG00000139278	GLIPR1	Fibroblast	3.18504e-279	0.925575	1.16537e-274	0.553	0.084	0.469
ENSG00000185650	ZFP36L1	Fibroblast	2.18548e-225	1.41167	7.99645e-221	0.88	0.411	0.469
ENSG00000140545	MFGE8	Fibroblast	1.45301e-193	1.20109	5.31641e-189	0.653	0.187	0.466
ENSG00000067798	NAV3	Fibroblast	0	1.03502	0	0.543	0.08	0.463
ENSG00000083444	PLOD1	Fibroblast	2.00669e-281	0.946944	7.34228e-277	0.669	0.206	0.463
ENSG00000123384	LRP1	Fibroblast	9.32316e-208	0.837172	3.41125e-203	0.567	0.113	0.454
ENSG00000142694	EVA1B	Fibroblast	0	0.776115	0	0.571	0.119	0.452
ENSG00000120913	PDLIM2	Fibroblast	0	1.1293	0	0.772	0.321	0.451
ENSG00000170485	NPAS2	Fibroblast	0	0.930074	0	0.491	0.041	0.45
ENSG00000233608	TWIST2	Fibroblast	0	1.37694	0	0.535	0.085	0.45
ENSG00000143320	CRABP2	Fibroblast	2.94022e-151	1.17506	1.0758e-146	0.767	0.319	0.448
ENSG00000070404	FSTL3	Fibroblast	0	0.848154	0	0.528	0.081	0.447
ENSG00000109099	PMP22	Fibroblast	0	1.00143	0	0.58	0.135	0.445
ENSG00000182718	ANXA2	Fibroblast	0	1.98661	0	0.982	0.538	0.444
ENSG00000171223	JUNB	Fibroblast	0	2.1777	0	0.896	0.455	0.441
ENSG00000182463	TSHZ2	Fibroblast	0	0.989686	0	0.534	0.093	0.441
ENSG00000204592	HLA-E	Fibroblast	1.61119e-111	0.763343	5.89517e-107	0.623	0.184	0.439
ENSG00000019549	SNAI2	Fibroblast	0	0.856423	0	0.454	0.016	0.438
ENSG00000197712	FAM114A1	Fibroblast	3.15557e-248	0.744466	1.15459e-243	0.562	0.124	0.438
ENSG00000117318	ID3	Fibroblast	5.3454e-73	1.34519	1.95583e-68	0.808	0.371	0.437
ENSG00000115461	IGFBP5	Fibroblast	3.5587e-236	2.03342	1.30209e-231	0.631	0.196	0.435
ENSG00000137573	SULF1	Fibroblast	0	1.13744	0	0.498	0.063	0.435
ENSG00000155366	RHOC	Fibroblast	6.18908e-59	0.855368	2.26452e-54	0.778	0.345	0.433
ENSG00000170345	FOS	Fibroblast	2.92809e-65	0.891124	1.07136e-60	0.757	0.325	0.432
ENSG00000142871	CCN1	Fibroblast	5.09306e-18	0.910195	1.8635e-13	0.683	0.252	0.431
ENSG00000162493	PDPN	Fibroblast	0	1.15333	0	0.624	0.194	0.43
ENSG00000144810	COL8A1	Fibroblast	0	1.00634	0	0.442	0.013	0.429
ENSG00000169604	ANTXR1	Fibroblast	0	1.17819	0	0.713	0.284	0.429
ENSG00000174807	CD248	Fibroblast	0	0.779919	0	0.44	0.011	0.429
ENSG00000204381	LAYN	Fibroblast	0	0.742152	0	0.489	0.06	0.429
ENSG00000197019	SERTAD1	Fibroblast	1.12105e-53	0.840698	4.10181e-49	0.613	0.185	0.428
ENSG00000085063	CD59	Fibroblast	1.27067e-158	0.915367	4.64927e-154	0.726	0.3	0.426
ENSG00000177606	JUN	Fibroblast	1.02192e-23	1.44381	3.73912e-19	0.903	0.477	0.426
ENSG00000120549	KIAA1217	Fibroblast	0	1.59544	0	0.859	0.434	0.425
ENSG00000106366	SERPINE1	Fibroblast	0	1.73631	0	0.443	0.02	0.423
ENSG00000107317	PTGDS	Fibroblast	0	2.01159	0	0.466	0.043	0.423
ENSG00000182916	TCEAL7	Fibroblast	0	0.831934	0	0.63	0.207	0.423
ENSG00000183722	LHFPL6	Fibroblast	0	0.908064	0	0.686	0.263	0.423
ENSG00000261064	LINC02256	Fibroblast	1.31661e-267	0.766784	4.81734e-263	0.55	0.127	0.423
ENSG00000129757	CDKN1C	Fibroblast	2.35569e-228	1.03004	8.61925e-224	0.647	0.225	0.422
ENSG00000102359	SRPX2	Fibroblast	0	0.818889	0	0.457	0.036	0.421
ENSG00000135916	ITM2C	Fibroblast	2.88987e-40	0.798938	1.05737e-35	0.688	0.267	0.421
ENSG00000092068	SLC7A8	Fibroblast	0	0.86185	0	0.499	0.08	0.419
ENSG00000104856	RELB	Fibroblast	5.28375e-175	0.896054	1.93327e-170	0.547	0.128	0.419
ENSG00000122641	INHBA	Fibroblast	0	1.10054	0	0.444	0.025	0.419
ENSG00000125740	FOSB	Fibroblast	4.07729e-30	0.797874	1.49184e-25	0.596	0.178	0.418
ENSG00000142669	SH3BGRL3	Fibroblast	0	1.18097	0	0.835	0.418	0.417
ENSG00000149591	TAGLN	Fibroblast	0	1.66176	0	0.466	0.049	0.417
ENSG00000196569	LAMA2	Fibroblast	0	1.15388	0	0.6	0.184	0.416
ENSG00000123240	OPTN	Fibroblast	3.85593e-135	0.689191	1.41085e-130	0.54	0.127	0.413
ENSG00000127124	HIVEP3	Fibroblast	0	1.01848	0	0.476	0.064	0.412
ENSG00000178104	PDE4DIP	Fibroblast	0	1.09151	0	0.594	0.182	0.412
ENSG00000213190	MLLT11	Fibroblast	9.13759e-203	0.883878	3.34335e-198	0.76	0.35	0.41
ENSG00000111799	COL12A1	Fibroblast	0	0.971896	0	0.444	0.035	0.409
ENSG00000127920	GNG11	Fibroblast	0	0.744394	0	0.482	0.073	0.409
ENSG00000162733	DDR2	Fibroblast	0	0.809922	0	0.529	0.12	0.409
ENSG00000234745	HLA-B	Fibroblast	7.12241e-57	0.88369	2.60602e-52	0.622	0.213	0.409
ENSG00000064666	CNN2	Fibroblast	5.15554e-195	0.790969	1.88636e-190	0.603	0.195	0.408
ENSG00000130066	SAT1	Fibroblast	4.49062e-160	0.733608	1.64307e-155	0.76	0.352	0.408
ENSG00000169071	ROR2	Fibroblast	2.65379e-303	0.844258	9.70996e-299	0.502	0.096	0.406
ENSG00000160789	LMNA	Fibroblast	4.13828e-85	0.791624	1.51415e-80	0.775	0.372	0.403
ENSG00000175482	POLD4	Fibroblast	5.02625e-71	0.692876	1.83905e-66	0.555	0.152	0.403
ENSG00000113083	LOX	Fibroblast	0	0.825616	0	0.487	0.087	0.4
ENSG00000157227	MMP14	Fibroblast	0	0.758151	0	0.425	0.025	0.4
ENSG00000105223	PLD3	Fibroblast	0	1.40447	0	0.927	0.528	0.399
ENSG00000163739	CXCL1	Fibroblast	0	1.99997	0	0.428	0.029	0.399
ENSG00000010818	HIVEP2	Fibroblast	9.33846e-145	0.88603	3.41685e-140	0.56	0.162	0.398
ENSG00000183580	FBXL7	Fibroblast	0	0.850158	0	0.651	0.253	0.398
ENSG00000272168	CASC15	Fibroblast	2.3043e-207	0.807833	8.43121e-203	0.588	0.19	0.398
ENSG00000164294	GPX8	Fibroblast	0	0.775718	0	0.615	0.218	0.397
ENSG00000250786	SNHG18	Fibroblast	6.54911e-196	0.625663	2.39625e-191	0.486	0.089	0.397
ENSG00000169504	CLIC4	Fibroblast	5.30807e-293	1.14467	1.94217e-288	0.753	0.357	0.396
ENSG00000167779	IGFBP6	Fibroblast	0	0.809119	0	0.417	0.022	0.395
ENSG00000166147	FBN1	Fibroblast	0	0.829578	0	0.453	0.061	0.392
ENSG00000109320	NFKB1	Fibroblast	0	1.52942	0	0.689	0.298	0.391
ENSG00000138080	EMILIN1	Fibroblast	0	0.693232	0	0.432	0.041	0.391
ENSG00000206503	HLA-A	Fibroblast	4.90486e-208	1.37511	1.79464e-203	0.907	0.517	0.39
ENSG00000126458	RRAS	Fibroblast	1.343e-243	0.652088	4.91389e-239	0.469	0.08	0.389
ENSG00000164949	GEM	Fibroblast	8.74729e-181	0.906927	3.20055e-176	0.458	0.069	0.389
ENSG00000250722	SELENOP	Fibroblast	9.09395e-34	0.461818	3.32738e-29	0.597	0.208	0.389
ENSG00000035862	TIMP2	Fibroblast	0	0.774492	0	0.584	0.196	0.388
ENSG00000184384	MAML2	Fibroblast	1.33348e-69	0.786472	4.87908e-65	0.624	0.237	0.387
ENSG00000116132	PRRX1	Fibroblast	0	0.856189	0	0.543	0.157	0.386
ENSG00000204525	HLA-C	Fibroblast	3.37907e-26	0.697564	1.23637e-21	0.567	0.181	0.386
ENSG00000176788	BASP1	Fibroblast	0	0.893157	0	0.833	0.452	0.381
ENSG00000267519	AC020916.1	Fibroblast	3.13358e-133	0.804226	1.14655e-128	0.469	0.088	0.381
ENSG00000143878	RHOB	Fibroblast	1.58413e-33	1.02127	5.79617e-29	0.732	0.352	0.38
ENSG00000115738	ID2	Fibroblast	0.00114027	0.895951	1	0.747	0.368	0.379
ENSG00000075420	FNDC3B	Fibroblast	0	1.27728	0	0.816	0.438	0.378
ENSG00000005243	COPZ2	Fibroblast	0	0.595695	0	0.39	0.013	0.377
ENSG00000131459	GFPT2	Fibroblast	0	0.692846	0	0.432	0.056	0.376
ENSG00000133106	EPSTI1	Fibroblast	4.58346e-269	0.762898	1.67704e-264	0.421	0.046	0.375
ENSG00000135111	TBX3	Fibroblast	1.62924e-93	0.694395	5.96122e-89	0.553	0.178	0.375
ENSG00000149380	P4HA3	Fibroblast	0	0.73698	0	0.426	0.051	0.375
ENSG00000172216	CEBPB	Fibroblast	9.48983e-180	0.971936	3.47223e-175	0.673	0.3	0.373
ENSG00000148450	MSRB2	Fibroblast	0	1.00312	0	0.764	0.392	0.372
ENSG00000169764	UGP2	Fibroblast	3.24101e-92	1.00761	1.18585e-87	0.758	0.388	0.37
ENSG00000269821	KCNQ1OT1	Fibroblast	0	1.14797	0	0.815	0.445	0.37
ENSG00000104870	FCGRT	Fibroblast	1.82318e-19	0.630597	6.67084e-15	0.682	0.313	0.369
ENSG00000133110	POSTN	Fibroblast	0	0.974258	0	0.443	0.074	0.369
ENSG00000072682	P4HA2	Fibroblast	2.58254e-202	0.781752	9.44926e-198	0.53	0.162	0.368
ENSG00000113448	PDE4D	Fibroblast	2.88353e-252	0.893775	1.05505e-247	0.799	0.431	0.368
ENSG00000107249	GLIS3	Fibroblast	4.65744e-234	0.861356	1.70411e-229	0.489	0.122	0.367
ENSG00000134531	EMP1	Fibroblast	5.0728e-173	0.875364	1.85609e-168	0.425	0.058	0.367
ENSG00000169429	CXCL8	Fibroblast	2.38186e-93	1.74427	8.71498e-89	0.449	0.082	0.367
ENSG00000135046	ANXA1	Fibroblast	1.64242e-133	0.839561	6.00943e-129	0.462	0.096	0.366
ENSG00000146278	PNRC1	Fibroblast	3.57972e-200	1.15474	1.30978e-195	0.792	0.426	0.366
ENSG00000176014	TUBB6	Fibroblast	3.39978e-303	0.688681	1.24394e-298	0.558	0.193	0.365
ENSG00000070540	WIPI1	Fibroblast	0	0.673343	0	0.418	0.054	0.364
ENSG00000163734	CXCL3	Fibroblast	2.69399e-169	1.54687	9.85703e-165	0.421	0.057	0.364
ENSG00000131669	NINJ1	Fibroblast	1.59497e-154	0.781214	5.83583e-150	0.613	0.252	0.361
ENSG00000159840	ZYX	Fibroblast	5.1115e-239	0.646843	1.87025e-234	0.512	0.151	0.361
ENSG00000158270	COLEC12	Fibroblast	0	0.84073	0	0.454	0.094	0.36
ENSG00000020577	SAMD4A	Fibroblast	1.82687e-41	0.768282	6.68432e-37	0.627	0.268	0.359
ENSG00000064601	CTSA	Fibroblast	2.10015e-172	0.745849	7.68423e-168	0.583	0.225	0.358
ENSG00000130449	ZSWIM6	Fibroblast	2.34981e-17	0.648276	8.59774e-13	0.72	0.362	0.358
ENSG00000163638	ADAMTS9	Fibroblast	4.60596e-246	0.775095	1.68528e-241	0.457	0.1	0.357
ENSG00000175197	DDIT3	Fibroblast	1.09667e-21	0.66567	4.01259e-17	0.61	0.253	0.357
ENSG00000286533	AL078604.4	Fibroblast	0	1.22592	0	0.428	0.071	0.357
ENSG00000123989	CHPF	Fibroblast	1.29335e-134	0.7109	4.73222e-130	0.587	0.231	0.356
ENSG00000053918	KCNQ1	Fibroblast	8.58609e-120	0.717384	3.14157e-115	0.539	0.184	0.355
ENSG00000117228	GBP1	Fibroblast	0	0.672309	0	0.374	0.02	0.354
ENSG00000150093	ITGB1	Fibroblast	0	1.21896	0	0.881	0.527	0.354
ENSG00000225177	AL590617.2	Fibroblast	0	0.717034	0	0.445	0.091	0.354
ENSG00000143322	ABL2	Fibroblast	0	1.07766	0	0.654	0.302	0.352
ENSG00000169439	SDC2	Fibroblast	1.08405e-279	0.661228	3.96645e-275	0.492	0.142	0.35
ENSG00000106624	AEBP1	Fibroblast	0	0.661432	0	0.401	0.053	0.348
ENSG00000188393	CLEC2A	Fibroblast	4.95342e-73	0.695818	1.81241e-68	0.609	0.261	0.348
ENSG00000125844	RRBP1	Fibroblast	5.80433e-202	0.79223	2.12375e-197	0.678	0.331	0.347
ENSG00000204103	MAFB	Fibroblast	0	0.848647	0	0.37	0.023	0.347
ENSG00000137575	SDCBP	Fibroblast	1.10503e-36	0.735793	4.04319e-32	0.77	0.424	0.346
ENSG00000177469	CAVIN1	Fibroblast	1.02219e-248	0.568487	3.7401e-244	0.396	0.05	0.346
ENSG00000182326	C1S	Fibroblast	1.68451e-307	0.688667	6.16344e-303	0.443	0.097	0.346
ENSG00000140092	FBLN5	Fibroblast	0	0.607721	0	0.357	0.012	0.345
ENSG00000147889	CDKN2A	Fibroblast	9.39054e-142	0.737437	3.4359e-137	0.442	0.099	0.343
ENSG00000175592	FOSL1	Fibroblast	1.04205e-104	0.698181	3.81276e-100	0.469	0.126	0.343
ENSG00000075618	FSCN1	Fibroblast	8.29177e-90	0.589181	3.03388e-85	0.647	0.305	0.342
ENSG00000198121	LPAR1	Fibroblast	9.90824e-306	0.555387	3.62533e-301	0.387	0.046	0.341
ENSG00000126005	MMP24OS	Fibroblast	7.62261e-58	0.729687	2.78904e-53	0.728	0.388	0.34
ENSG00000112559	MDFI	Fibroblast	9.35055e-108	0.571799	3.42127e-103	0.49	0.151	0.339
ENSG00000198467	TPM2	Fibroblast	0	1.72619	0	0.964	0.625	0.339
ENSG00000151067	CACNA1C	Fibroblast	0	0.743551	0	0.448	0.11	0.338
ENSG00000114251	WNT5A	Fibroblast	0	0.673686	0	0.381	0.045	0.336
ENSG00000141756	FKBP10	Fibroblast	0	1.1046	0	0.86	0.524	0.336
ENSG00000197702	PARVA	Fibroblast	6.62159e-174	0.585772	2.42277e-169	0.478	0.142	0.336
ENSG00000090013	BLVRB	Fibroblast	1.16222e-11	0.5013	4.25243e-07	0.638	0.303	0.335
ENSG00000213625	LEPROT	Fibroblast	1.86587e-70	0.61048	6.82704e-66	0.601	0.266	0.335
ENSG00000132639	SNAP25	Fibroblast	0	0.601324	5.53642e-306	0.42	0.086	0.334
ENSG00000160888	IER2	Fibroblast	2.69954e-13	1.15855	9.87734e-09	0.853	0.519	0.334
ENSG00000138448	ITGAV	Fibroblast	5.42045e-71	0.640283	1.98329e-66	0.513	0.18	0.333
ENSG00000161638	ITGA5	Fibroblast	2.93217e-305	0.595451	1.07285e-300	0.373	0.04	0.333
ENSG00000183160	TMEM119	Fibroblast	0	0.626783	0	0.358	0.025	0.333
ENSG00000168461	RAB31	Fibroblast	0	0.621171	0	0.409	0.078	0.331
ENSG00000122694	GLIPR2	Fibroblast	0	0.575891	0	0.421	0.092	0.329
ENSG00000155090	KLF10	Fibroblast	1.47225e-85	0.731241	5.3868e-81	0.54	0.211	0.329
ENSG00000077782	FGFR1	Fibroblast	4.28351e-232	0.63414	1.56729e-227	0.533	0.205	0.328
ENSG00000159128	IFNGR2	Fibroblast	1.11566e-160	0.8766	4.08208e-156	0.686	0.358	0.328
ENSG00000178719	GRINA	Fibroblast	2.16113e-132	0.596441	7.90736e-128	0.579	0.251	0.328
ENSG00000204866	IGFL2	Fibroblast	0	2.408	0	0.357	0.029	0.328
ENSG00000174099	MSRB3	Fibroblast	0	0.530961	0	0.374	0.047	0.327
ENSG00000039560	RAI14	Fibroblast	0	0.74848	0	0.623	0.297	0.326
ENSG00000251003	ZFPM2-AS1	Fibroblast	3.42566e-186	0.652329	1.25342e-181	0.39	0.064	0.326
ENSG00000153250	RBMS1	Fibroblast	5.35216e-152	0.65887	1.9583e-147	0.624	0.301	0.323
ENSG00000174938	SEZ6L2	Fibroblast	1.26042e-41	0.546983	4.61174e-37	0.496	0.173	0.323
ENSG00000126709	IFI6	Fibroblast	2.01946e-135	0.807757	7.38899e-131	0.394	0.072	0.322
ENSG00000237596	AL138828.1	Fibroblast	0	0.620155	0	0.338	0.016	0.322
ENSG00000183831	ANKRD45	Fibroblast	1.49149e-129	0.517032	5.45721e-125	0.422	0.101	0.321
ENSG00000167601	AXL	Fibroblast	4.519e-241	0.537247	1.65346e-236	0.355	0.036	0.319
ENSG00000120594	PLXDC2	Fibroblast	0	0.745936	0	0.48	0.162	0.318
ENSG00000167123	CERCAM	Fibroblast	1.38619e-181	0.534928	5.07194e-177	0.432	0.114	0.318
ENSG00000174705	SH3PXD2B	Fibroblast	1.00169e-299	0.704134	3.66508e-295	0.518	0.2	0.318
ENSG00000079150	FKBP7	Fibroblast	0	0.601965	2.32278e-305	0.495	0.18	0.315
ENSG00000150961	SEC24D	Fibroblast	4.29388e-114	0.557426	1.57109e-109	0.461	0.146	0.315
ENSG00000068697	LAPTM4A	Fibroblast	2.14647e-224	1.20417	7.85372e-220	0.908	0.594	0.314
ENSG00000157613	CREB3L1	Fibroblast	1.02887e-257	0.515618	3.76454e-253	0.36	0.046	0.314
ENSG00000091136	LAMB1	Fibroblast	5.51817e-240	0.640273	2.01904e-235	0.48	0.167	0.313
ENSG00000243279	PRAF2	Fibroblast	6.87246e-224	0.567979	2.51456e-219	0.5	0.187	0.313
ENSG00000124813	RUNX2	Fibroblast	1.19221e-301	0.575138	4.36219e-297	0.408	0.097	0.311
ENSG00000145012	LPP	Fibroblast	2.06198e-40	0.471833	7.54458e-36	0.769	0.458	0.311
ENSG00000075426	FOSL2	Fibroblast	2.43969e-85	0.519819	8.92659e-81	0.415	0.105	0.31
ENSG00000134590	RTL8C	Fibroblast	1.6696e-210	0.696065	6.10889e-206	0.649	0.34	0.309
ENSG00000129116	PALLD	Fibroblast	7.32878e-257	0.906529	2.68153e-252	0.741	0.434	0.307
ENSG00000157110	RBPMS	Fibroblast	2.13398e-28	0.457177	7.80801e-24	0.531	0.224	0.307
ENSG00000166340	TPP1	Fibroblast	2.47119e-118	0.531522	9.04182e-114	0.458	0.151	0.307
ENSG00000203804	ADAMTSL4-AS1	Fibroblast	2.40236e-108	0.686511	8.79001e-104	0.423	0.116	0.307
ENSG00000232527	LINC02802	Fibroblast	1.29897e-61	0.582806	4.75279e-57	0.619	0.312	0.307
ENSG00000002586	CD99	Fibroblast	0	1.10694	0	0.862	0.557	0.305
ENSG00000139289	PHLDA1	Fibroblast	2.69142e-09	0.513908	9.84764e-05	0.499	0.194	0.305
ENSG00000152952	PLOD2	Fibroblast	2.06518e-15	0.728012	7.55629e-11	0.661	0.356	0.305
ENSG00000072110	ACTN1	Fibroblast	1.39642e-219	0.741057	5.10937e-215	0.62	0.316	0.304
ENSG00000103876	FAH	Fibroblast	3.52775e-307	0.852409	1.29077e-302	0.553	0.249	0.304
ENSG00000107968	MAP3K8	Fibroblast	8.67134e-167	0.578012	3.17276e-162	0.415	0.113	0.302
ENSG00000146674	IGFBP3	Fibroblast	1.78412e-262	1.4264	6.52791e-258	0.341	0.039	0.302
ENSG00000167460	TPM4	Fibroblast	7.32009e-305	1.14191	2.67835e-300	0.93	0.628	0.302
ENSG00000185222	TCEAL9	Fibroblast	0	1.59849	0	0.968	0.669	0.299
ENSG00000054356	PTPRN	Fibroblast	6.27727e-249	0.513339	2.29679e-244	0.32	0.024	0.296
ENSG00000113721	PDGFRB	Fibroblast	0	0.739877	0	0.314	0.018	0.296
ENSG00000005893	LAMP2	Fibroblast	1.18359e-40	0.555579	4.33065e-36	0.539	0.244	0.295
ENSG00000024422	EHD2	Fibroblast	3.05652e-305	0.459753	1.11835e-300	0.312	0.017	0.295
ENSG00000103855	CD276	Fibroblast	2.09611e-167	0.556728	7.66947e-163	0.459	0.165	0.294
ENSG00000138061	CYP1B1	Fibroblast	3.46206e-267	0.911246	1.26673e-262	0.382	0.088	0.294
ENSG00000115594	IL1R1	Fibroblast	2.44026e-299	0.67908	8.92867e-295	0.316	0.023	0.293
ENSG00000132002	DNAJB1	Fibroblast	3.75214e-14	0.54966	1.37287e-09	0.655	0.362	0.293
ENSG00000099953	MMP11	Fibroblast	3.04314e-279	1.48273	1.11345e-274	0.341	0.049	0.292
ENSG00000118292	C1orf54	Fibroblast	5.226e-214	0.560622	1.91214e-209	0.367	0.075	0.292
ENSG00000118508	RAB32	Fibroblast	2.56299e-129	0.581048	9.37774e-125	0.639	0.347	0.292
ENSG00000151135	TMEM263	Fibroblast	1.39572e-76	0.522723	5.1068e-72	0.507	0.215	0.292
ENSG00000030582	GRN	Fibroblast	1.22498e-49	0.660296	4.48209e-45	0.666	0.375	0.291
ENSG00000123096	SSPN	Fibroblast	1.2392e-289	0.492811	4.53411e-285	0.331	0.041	0.29
ENSG00000109046	WSB1	Fibroblast	3.21589e-52	0.986021	1.17666e-47	0.896	0.608	0.288
ENSG00000217128	FNIP1	Fibroblast	1.32574e-60	0.780464	4.85074e-56	0.791	0.504	0.287
ENSG00000116962	NID1	Fibroblast	1.50432e-203	0.553245	5.50415e-199	0.344	0.058	0.286
ENSG00000124762	CDKN1A	Fibroblast	3.87587e-05	0.551237	1	0.528	0.242	0.286
ENSG00000155011	DKK2	Fibroblast	0	0.783854	0	0.325	0.039	0.286
ENSG00000161011	SQSTM1	Fibroblast	5.9201e-33	1.1596	2.1661e-28	0.908	0.622	0.286
ENSG00000117519	CNN3	Fibroblast	5.28275e-126	0.71344	1.9329e-121	0.699	0.414	0.285
ENSG00000125347	IRF1	Fibroblast	1.20614e-101	0.540796	4.41314e-97	0.349	0.064	0.285
ENSG00000134138	MEIS2	Fibroblast	1.17226e-219	0.508533	4.2892e-215	0.519	0.234	0.285
ENSG00000112655	PTK7	Fibroblast	0	0.72674	0	0.604	0.32	0.284
ENSG00000113732	ATP6V0E1	Fibroblast	0	1.15875	0	0.961	0.677	0.284
ENSG00000143384	MCL1	Fibroblast	1.7914e-11	0.605588	6.55456e-07	0.626	0.343	0.283
ENSG00000128656	CHN1	Fibroblast	0	0.71513	0	0.666	0.384	0.282
ENSG00000128595	CALU	Fibroblast	0	0.817012	0	0.827	0.546	0.281
ENSG00000150907	FOXO1	Fibroblast	7.83214e-189	0.718842	2.8657e-184	0.357	0.076	0.281
ENSG00000067182	TNFRSF1A	Fibroblast	1.86001e-47	0.463208	6.80559e-43	0.425	0.145	0.28
ENSG00000079257	LXN	Fibroblast	1.37152e-147	0.621212	5.01825e-143	0.365	0.085	0.28
ENSG00000100196	KDELR3	Fibroblast	1.27462e-199	0.496096	4.66372e-195	0.365	0.085	0.28
ENSG00000122786	CALD1	Fibroblast	0	2.16471	0	0.977	0.697	0.28
ENSG00000134853	PDGFRA	Fibroblast	0	0.539704	0	0.285	0.005	0.28
ENSG00000139112	GABARAPL1	Fibroblast	2.42459e-45	0.448705	8.87135e-41	0.378	0.098	0.28
ENSG00000108960	MMD	Fibroblast	5.56845e-221	0.5332	2.03744e-216	0.379	0.1	0.279
ENSG00000144642	RBMS3	Fibroblast	8.97986e-202	0.566942	3.28564e-197	0.491	0.212	0.279
ENSG00000166250	CLMP	Fibroblast	0	0.511405	5.57945e-307	0.393	0.114	0.279
ENSG00000180964	TCEAL8	Fibroblast	7.26838e-124	0.888418	2.65943e-119	0.898	0.619	0.279
ENSG00000198715	GLMP	Fibroblast	1.24777e-92	0.513203	4.56547e-88	0.5	0.221	0.279
ENSG00000224363	FP700111.1	Fibroblast	1.64686e-157	0.566221	6.0257e-153	0.756	0.477	0.279
ENSG00000197746	PSAP	Fibroblast	5.82958e-243	1.12578	2.13298e-238	0.904	0.627	0.277
ENSG00000006327	TNFRSF12A	Fibroblast	1.95055e-23	0.438443	7.13688e-19	0.525	0.249	0.276
ENSG00000159674	SPON2	Fibroblast	1.19035e-237	1.36695	4.35535e-233	0.311	0.035	0.276
ENSG00000148926	ADM	Fibroblast	4.93821e-10	0.51973	1.80684e-05	0.46	0.185	0.275
ENSG00000159216	RUNX1	Fibroblast	3.66889e-19	0.459459	1.34241e-14	0.464	0.189	0.275
ENSG00000162236	STX5	Fibroblast	7.21332e-20	0.466072	2.63928e-15	0.452	0.177	0.275
ENSG00000171621	SPSB1	Fibroblast	9.00809e-73	0.486754	3.29597e-68	0.344	0.069	0.275
ENSG00000222041	CYTOR	Fibroblast	5.96621e-32	0.460323	2.18298e-27	0.544	0.269	0.275
ENSG00000271774	AL109930.1	Fibroblast	3.75824e-265	0.56034	1.3751e-260	0.295	0.02	0.275
ENSG00000163874	ZC3H12A	Fibroblast	1.7718e-35	0.488415	6.48285e-31	0.362	0.088	0.274
ENSG00000185022	MAFF	Fibroblast	3.85435e-06	0.441379	0.141027	0.424	0.15	0.274
ENSG00000257704	INAFM1	Fibroblast	2.66465e-177	0.50504	9.7497e-173	0.363	0.089	0.274
ENSG00000105894	PTN	Fibroblast	0	0.727766	0	0.443	0.17	0.273
ENSG00000125966	MMP24	Fibroblast	3.85663e-21	0.4094	1.4111e-16	0.44	0.167	0.273
ENSG00000187391	MAGI2	Fibroblast	0	0.674294	0	0.638	0.365	0.273
ENSG00000049323	LTBP1	Fibroblast	7.38094e-205	0.678229	2.70061e-200	0.457	0.185	0.272
ENSG00000104324	CPQ	Fibroblast	1.61329e-221	0.432379	5.90288e-217	0.323	0.051	0.272
ENSG00000166311	SMPD1	Fibroblast	8.49232e-146	0.439699	3.10726e-141	0.323	0.051	0.272
ENSG00000162407	PLPP3	Fibroblast	5.50788e-120	0.629413	2.01528e-115	0.372	0.101	0.271
ENSG00000227906	SNAP25-AS1	Fibroblast	3.28937e-199	0.497838	1.20355e-194	0.325	0.054	0.271
ENSG00000112378	PERP	Fibroblast	7.78481e-145	0.282786	2.84839e-140	0.642	0.372	0.27
ENSG00000187498	COL4A1	Fibroblast	6.33509e-288	0.657618	2.31794e-283	0.445	0.175	0.27
ENSG00000112137	PHACTR1	Fibroblast	2.86091e-255	0.636203	1.04678e-250	0.392	0.123	0.269
ENSG00000114115	RBP1	Fibroblast	4.80133e-44	0.64287	1.75676e-39	0.487	0.218	0.269
ENSG00000117385	P3H1	Fibroblast	6.7775e-179	0.487994	2.47982e-174	0.428	0.159	0.269
ENSG00000105419	MEIS3	Fibroblast	1.17867e-213	0.43464	4.31263e-209	0.342	0.074	0.268
ENSG00000134986	NREP	Fibroblast	3.79263e-163	0.818309	1.38769e-158	0.704	0.436	0.268
ENSG00000136960	ENPP2	Fibroblast	3.02408e-192	0.552813	1.10648e-187	0.326	0.058	0.268
ENSG00000142046	TMEM91	Fibroblast	6.62408e-158	0.479196	2.42369e-153	0.378	0.11	0.268
ENSG00000165061	ZMAT4	Fibroblast	4.27384e-107	0.613288	1.56376e-102	0.333	0.065	0.268
ENSG00000177576	C18orf32	Fibroblast	2.67929e-30	0.579812	9.80325e-26	0.743	0.475	0.268
ENSG00000179820	MYADM	Fibroblast	4.46597e-44	0.454685	1.63405e-39	0.431	0.163	0.268
ENSG00000101460	MAP1LC3A	Fibroblast	3.88158e-136	0.415686	1.42023e-131	0.359	0.092	0.267
ENSG00000101236	RNF24	Fibroblast	5.22935e-141	0.563952	1.91337e-136	0.495	0.229	0.266
ENSG00000099250	NRP1	Fibroblast	2.04567e-129	0.491832	7.48489e-125	0.32	0.055	0.265
ENSG00000138069	RAB1A	Fibroblast	8.78212e-09	0.680591	0.000321329	0.843	0.578	0.265
ENSG00000163565	IFI16	Fibroblast	1.79769e-218	0.43695	6.57756e-214	0.298	0.033	0.265
ENSG00000167157	PRRX2	Fibroblast	4.22453e-275	0.495214	1.54571e-270	0.348	0.083	0.265
ENSG00000118849	RARRES1	Fibroblast	1.73982e-190	0.566293	6.36582e-186	0.338	0.074	0.264
ENSG00000132003	ZSWIM4	Fibroblast	1.23819e-64	0.517335	4.53043e-60	0.343	0.079	0.264
ENSG00000204386	NEU1	Fibroblast	7.81255e-09	0.421583	0.000285854	0.551	0.287	0.264
ENSG00000111341	MGP	Fibroblast	9.96575e-293	1.54318	3.64637e-288	0.271	0.008	0.263
ENSG00000163703	CRELD1	Fibroblast	3.12968e-64	0.432987	1.14512e-59	0.423	0.16	0.263
ENSG00000086062	B4GALT1	Fibroblast	1.31618e-17	0.544291	4.81576e-13	0.414	0.152	0.262
ENSG00000115641	FHL2	Fibroblast	1.48247e-158	0.658973	5.42421e-154	0.584	0.322	0.262
ENSG00000206573	THUMPD3-AS1	Fibroblast	6.47279e-13	0.727152	2.36833e-08	0.728	0.466	0.262
ENSG00000138639	ARHGAP24	Fibroblast	1.76483e-84	0.499081	6.45732e-80	0.403	0.142	0.261
ENSG00000169306	IL1RAPL1	Fibroblast	0	0.519737	0	0.429	0.168	0.261
ENSG00000115520	COQ10B	Fibroblast	2.99502e-58	0.43247	1.09585e-53	0.382	0.122	0.26
ENSG00000136240	KDELR2	Fibroblast	0	1.15137	0	0.909	0.65	0.259
ENSG00000186577	SMIM29	Fibroblast	3.53672e-138	0.423926	1.29405e-133	0.344	0.085	0.259
ENSG00000182636	NDN	Fibroblast	5.51574e-209	0.733192	2.01816e-204	0.724	0.466	0.258
ENSG00000196507	TCEAL3	Fibroblast	1.03991e-274	0.81544	3.80494e-270	0.619	0.361	0.258
ENSG00000274265	AC245297.3	Fibroblast	1.59379e-32	0.414599	5.83152e-28	0.437	0.179	0.258
ENSG00000137959	IFI44L	Fibroblast	7.81035e-120	0.441361	2.85773e-115	0.314	0.057	0.257
ENSG00000146592	CREB5	Fibroblast	3.78277e-66	0.385931	1.38408e-61	0.51	0.253	0.257
ENSG00000131196	NFATC1	Fibroblast	3.44077e-230	0.545957	1.25894e-225	0.274	0.018	0.256
ENSG00000253982	AC100810.1	Fibroblast	6.79864e-91	0.39967	2.48755e-86	0.347	0.091	0.256
ENSG00000038427	VCAN	Fibroblast	0	1.24578	0	0.78	0.525	0.255
ENSG00000140416	TPM1	Fibroblast	2.15124e-28	0.897337	7.87116e-24	0.764	0.509	0.255
ENSG00000149090	PAMR1	Fibroblast	9.30707e-281	0.463944	3.40537e-276	0.267	0.012	0.255
ENSG00000165995	CACNB2	Fibroblast	1.36677e-155	0.68764	5.00088e-151	0.496	0.241	0.255
ENSG00000226179	LINC00685	Fibroblast	2.21063e-88	0.471156	8.08846e-84	0.382	0.127	0.255
ENSG00000141504	SAT2	Fibroblast	1.03178e-152	0.73495	3.77518e-148	0.824	0.57	0.254
ENSG00000143545	RAB13	Fibroblast	1.17176e-200	0.879794	4.28734e-196	0.828	0.574	0.254
ENSG00000185070	FLRT2	Fibroblast	0	0.458927	0	0.382	0.128	0.254
ENSG00000248905	FMN1	Fibroblast	3.52059e-227	0.679164	1.28815e-222	0.288	0.034	0.254
ENSG00000116857	TMEM9	Fibroblast	2.28813e-68	0.642519	8.37202e-64	0.711	0.458	0.253
ENSG00000122884	P4HA1	Fibroblast	3.39806e-21	0.59602	1.24332e-16	0.824	0.571	0.253
ENSG00000136603	SKIL	Fibroblast	2.05983e-22	0.509282	7.53673e-18	0.48	0.227	0.253
ENSG00000168374	ARF4	Fibroblast	2.03776e-91	0.919761	7.45597e-87	0.912	0.66	0.252
ENSG00000213977	TAX1BP3	Fibroblast	1.00094e-41	0.466532	3.66234e-37	0.515	0.263	0.252
ENSG00000135506	OS9	Fibroblast	8.94632e-44	0.506959	3.27337e-39	0.569	0.318	0.251
ENSG00000145431	PDGFC	Fibroblast	3.89666e-77	0.430309	1.42575e-72	0.409	0.158	0.251
ENSG00000197324	LRP10	Fibroblast	1.50701e-72	0.385559	5.51401e-68	0.339	0.088	0.251
ENSG00000067082	KLF6	Fibroblast	4.53478e-100	0.443041	1.65923e-95	0.707	0.457	0.25
ENSG00000198892	SHISA4	Fibroblast	1.80539e-188	0.362455	6.60575e-184	0.27	0.02	0.25
ENSG00000100321	SYNGR1	Fibroblast	0	0.543481	0	0.519	0.27	0.249
ENSG00000100739	BDKRB1	Fibroblast	5.14071e-292	0.591827	1.88093e-287	0.254	0.005	0.249
ENSG00000105329	TGFB1	Fibroblast	1.34954e-84	0.48519	4.93785e-80	0.424	0.175	0.249
ENSG00000151388	ADAMTS12	Fibroblast	1.71949e-281	0.524103	6.29144e-277	0.3	0.051	0.249
ENSG00000154710	RABGEF1	Fibroblast	5.74583e-92	0.788229	2.10234e-87	0.692	0.443	0.249
ENSG00000162458	FBLIM1	Fibroblast	1.06568e-34	0.393236	3.8992e-30	0.336	0.087	0.249
ENSG00000256797	KLRF2	Fibroblast	3.77323e-52	0.445636	1.38059e-47	0.343	0.094	0.249
ENSG00000233912	AC026202.2	Fibroblast	2.14437e-107	0.447034	7.84605e-103	0.342	0.094	0.248
ENSG00000006042	TMEM98	Fibroblast	6.14254e-57	0.562128	2.24749e-52	0.672	0.425	0.247
ENSG00000099139	PCSK5	Fibroblast	1.66772e-132	0.719184	6.10203e-128	0.344	0.097	0.247
ENSG00000160691	SHC1	Fibroblast	8.98588e-107	0.410721	3.28784e-102	0.368	0.121	0.247
ENSG00000253309	SERPINE3	Fibroblast	4.25053e-24	0.487464	1.55523e-19	0.329	0.082	0.247
ENSG00000286186	AC018445.5	Fibroblast	4.94341e-247	0.511312	1.80874e-242	0.258	0.011	0.247
ENSG00000077092	RARB	Fibroblast	6.42563e-206	0.501674	2.35107e-201	0.338	0.092	0.246
ENSG00000128606	LRRC17	Fibroblast	8.81328e-300	0.515942	3.22469e-295	0.324	0.078	0.246
ENSG00000187608	ISG15	Fibroblast	9.13762e-52	0.618179	3.34336e-47	0.386	0.14	0.246
ENSG00000196460	RFX8	Fibroblast	2.24615e-280	0.465297	8.21842e-276	0.253	0.007	0.246
ENSG00000119801	YPEL5	Fibroblast	5.1457e-28	0.367325	1.88276e-23	0.453	0.21	0.243
ENSG00000182220	ATP6AP2	Fibroblast	4.73861e-55	0.524902	1.73381e-50	0.58	0.337	0.243
ENSG00000112902	SEMA5A	Fibroblast	8.75529e-202	0.46788	3.20347e-197	0.288	0.046	0.242
ENSG00000136732	GYPC	Fibroblast	0	0.763458	0	0.895	0.653	0.242
ENSG00000139926	FRMD6	Fibroblast	1.13575e-142	0.448945	4.15561e-138	0.3	0.058	0.242
ENSG00000105404	RABAC1	Fibroblast	0	0.884819	0	0.88	0.639	0.241
ENSG00000145623	OSMR	Fibroblast	3.23012e-139	0.400748	1.18187e-134	0.283	0.042	0.241
ENSG00000163660	CCNL1	Fibroblast	4.65012e-25	0.656367	1.70143e-20	0.737	0.496	0.241
ENSG00000166272	WBP1L	Fibroblast	4.83228e-148	0.410126	1.76808e-143	0.332	0.091	0.241
ENSG00000084636	COL16A1	Fibroblast	3.6238e-198	0.429597	1.32591e-193	0.298	0.058	0.24
ENSG00000106665	CLIP2	Fibroblast	9.45613e-133	0.500629	3.4599e-128	0.285	0.045	0.24
ENSG00000107736	CDH23	Fibroblast	3.82182e-210	0.620512	1.39836e-205	0.28	0.04	0.24
ENSG00000136770	DNAJC1	Fibroblast	2.61288e-45	0.590429	9.56025e-41	0.731	0.491	0.24
ENSG00000102908	NFAT5	Fibroblast	2.1733e-34	0.578996	7.95188e-30	0.631	0.392	0.239
ENSG00000105974	CAV1	Fibroblast	1.42427e-152	0.43214	5.21126e-148	0.284	0.045	0.239
ENSG00000112096	SOD2	Fibroblast	0	1.66447	0	0.817	0.578	0.239
ENSG00000118523	CCN2	Fibroblast	4.60658e-111	0.279491	1.6855e-106	0.472	0.233	0.239
ENSG00000131435	PDLIM4	Fibroblast	1.92803e-166	0.523139	7.05445e-162	0.672	0.433	0.239
ENSG00000140931	CMTM3	Fibroblast	3.30928e-53	0.433527	1.21083e-48	0.436	0.197	0.239
ENSG00000100243	CYB5R3	Fibroblast	1.29255e-30	0.570027	4.72931e-26	0.671	0.433	0.238
ENSG00000104415	CCN4	Fibroblast	5.00357e-282	0.422275	1.83076e-277	0.242	0.004	0.238
ENSG00000124145	SDC4	Fibroblast	1.73956e-45	0.366599	6.36487e-41	0.322	0.084	0.238
ENSG00000087253	LPCAT2	Fibroblast	1.63945e-172	0.432337	5.99857e-168	0.295	0.058	0.237
ENSG00000286458	AC083870.1	Fibroblast	1.44639e-147	0.488103	5.2922e-143	0.314	0.077	0.237
ENSG00000132386	SERPINF1	Fibroblast	1.00914e-237	1.04244	3.69233e-233	0.587	0.351	0.236
ENSG00000042493	CAPG	Fibroblast	1.96431e-24	0.353978	7.18722e-20	0.357	0.122	0.235
ENSG00000050405	LIMA1	Fibroblast	1.69415e-32	0.59779	6.19873e-28	0.62	0.385	0.235
ENSG00000124570	SERPINB6	Fibroblast	1.71177e-10	0.388959	6.26318e-06	0.54	0.305	0.235
ENSG00000163697	APBB2	Fibroblast	2.5905e-227	0.599991	9.47837e-223	0.584	0.349	0.235
ENSG00000227227	AC017101.1	Fibroblast	1.49825e-52	0.426484	5.48193e-48	0.298	0.063	0.235
ENSG00000180304	OAZ2	Fibroblast	1.36829e-20	0.416436	5.00645e-16	0.553	0.319	0.234
ENSG00000115977	AAK1	Fibroblast	1.85958e-102	0.43659	6.80403e-98	0.441	0.208	0.233
ENSG00000123104	ITPR2	Fibroblast	2.30182e-52	0.434828	8.42213e-48	0.444	0.211	0.233
ENSG00000144746	ARL6IP5	Fibroblast	1.4691e-35	0.556335	5.37529e-31	0.691	0.458	0.233
ENSG00000112149	CD83	Fibroblast	4.03115e-141	0.558916	1.47496e-136	0.289	0.057	0.232
ENSG00000168140	VASN	Fibroblast	2.54999e-178	0.369438	9.33015e-174	0.256	0.024	0.232
ENSG00000131171	SH3BGRL	Fibroblast	1.72912e-112	0.49584	6.32668e-108	0.624	0.393	0.231
ENSG00000197043	ANXA6	Fibroblast	2.39044e-229	0.483019	8.74636e-225	0.507	0.277	0.23
ENSG00000069667	RORA	Fibroblast	1.90022e-103	0.619657	6.95273e-99	0.64	0.411	0.229
ENSG00000105989	WNT2	Fibroblast	3.41688e-276	0.508683	1.2502e-271	0.232	0.003	0.229
ENSG00000115380	EFEMP1	Fibroblast	7.99058e-246	0.653721	2.92367e-241	0.243	0.014	0.229
ENSG00000163661	PTX3	Fibroblast	4.63037e-253	0.595328	1.69421e-248	0.312	0.083	0.229
ENSG00000183570	PCBP3	Fibroblast	3.84537e-160	0.370063	1.40698e-155	0.278	0.049	0.229
ENSG00000196924	FLNA	Fibroblast	9.82491e-182	0.531064	3.59484e-177	0.516	0.287	0.229
ENSG00000059804	SLC2A3	Fibroblast	1.02336e-23	0.279412	3.74437e-19	0.422	0.194	0.228
ENSG00000077549	CAPZB	Fibroblast	1.95343e-237	0.875669	7.14741e-233	0.87	0.642	0.228
ENSG00000113742	CPEB4	Fibroblast	6.44601e-90	0.401147	2.35853e-85	0.317	0.089	0.228
ENSG00000137312	FLOT1	Fibroblast	1.28053e-47	0.496301	4.68533e-43	0.614	0.386	0.228
ENSG00000151617	EDNRA	Fibroblast	7.00132e-218	0.469928	2.56171e-213	0.275	0.047	0.228
ENSG00000157045	NTAN1	Fibroblast	2.09442e-97	0.416545	7.66327e-93	0.44	0.213	0.227
ENSG00000168528	SERINC2	Fibroblast	3.10267e-39	0.26044	1.13524e-34	0.394	0.167	0.227
ENSG00000090339	ICAM1	Fibroblast	9.01361e-108	0.550605	3.29799e-103	0.259	0.033	0.226
ENSG00000113580	NR3C1	Fibroblast	1.92142e-73	0.377592	7.03028e-69	0.348	0.122	0.226
ENSG00000196141	SPATS2L	Fibroblast	5.39528e-13	0.457421	1.97408e-08	0.653	0.427	0.226
ENSG00000196562	SULF2	Fibroblast	3.69205e-149	0.450312	1.35088e-144	0.32	0.094	0.226
ENSG00000127946	HIP1	Fibroblast	5.98967e-156	0.552328	2.19156e-151	0.422	0.197	0.225
ENSG00000129038	LOXL1	Fibroblast	2.54231e-226	0.54441	9.30207e-222	0.434	0.209	0.225
ENSG00000166710	B2M	Fibroblast	0	2.22596	0	0.995	0.77	0.225
ENSG00000174307	PHLDA3	Fibroblast	5.77806e-28	0.384135	2.11414e-23	0.39	0.165	0.225
ENSG00000214063	TSPAN4	Fibroblast	2.88057e-271	0.504531	1.05397e-266	0.525	0.3	0.225
ENSG00000108691	CCL2	Fibroblast	1.27526e-226	0.964985	4.66606e-222	0.235	0.011	0.224
ENSG00000102316	MAGED2	Fibroblast	5.89999e-62	0.592386	2.15875e-57	0.704	0.481	0.223
ENSG00000105810	CDK6	Fibroblast	1.97744e-52	0.515682	7.23524e-48	0.419	0.196	0.223
ENSG00000109906	ZBTB16	Fibroblast	1.74789e-203	0.45057	6.39535e-199	0.263	0.04	0.223
ENSG00000122417	ODF2L	Fibroblast	1.15014e-51	0.386983	4.20825e-47	0.424	0.202	0.222
ENSG00000141837	CACNA1A	Fibroblast	1.2379e-23	0.284529	4.52934e-19	0.468	0.246	0.222
ENSG00000182742	HOXB4	Fibroblast	7.72341e-223	0.417	2.82592e-218	0.252	0.03	0.222
ENSG00000185291	IL3RA	Fibroblast	3.92156e-14	0.374988	1.43486e-09	0.325	0.103	0.222
ENSG00000246705	H2AFJ	Fibroblast	4.03324e-10	0.431684	1.47572e-05	0.547	0.325	0.222
ENSG00000003436	TFPI	Fibroblast	7.78871e-58	0.371418	2.84981e-53	0.287	0.066	0.221
ENSG00000080573	COL5A3	Fibroblast	8.86455e-267	0.552125	3.24345e-262	0.227	0.006	0.221
ENSG00000115963	RND3	Fibroblast	1.38089e-18	0.545782	5.05253e-14	0.567	0.346	0.221
ENSG00000183386	FHL3	Fibroblast	2.04977e-140	0.496493	7.49991e-136	0.437	0.216	0.221
ENSG00000137266	SLC22A23	Fibroblast	7.27648e-167	0.524872	2.66239e-162	0.365	0.145	0.22
ENSG00000159388	BTG2	Fibroblast	1.41019e-13	0.421081	5.15975e-09	0.508	0.288	0.22
ENSG00000213853	EMP2	Fibroblast	2.94034e-111	0.673021	1.07584e-106	0.391	0.171	0.22
ENSG00000230423	AL672310.1	Fibroblast	1.31495e-126	0.575166	4.81127e-122	0.294	0.074	0.22
ENSG00000066697	MSANTD3	Fibroblast	1.26993e-123	0.440794	4.64655e-119	0.446	0.227	0.219
ENSG00000075223	SEMA3C	Fibroblast	1.77164e-27	0.395506	6.48227e-23	0.333	0.114	0.219
ENSG00000132854	KANK4	Fibroblast	1.88907e-203	0.430144	6.9119e-199	0.24	0.021	0.219
ENSG00000197536	C5orf56	Fibroblast	6.99019e-64	0.401865	2.55764e-59	0.275	0.056	0.219
ENSG00000073712	FERMT2	Fibroblast	1.64288e-148	0.470827	6.01112e-144	0.515	0.297	0.218
ENSG00000100417	PMM1	Fibroblast	2.75856e-23	0.382365	1.00933e-18	0.502	0.284	0.218
ENSG00000101421	CHMP4B	Fibroblast	6.70409e-16	0.38309	2.45296e-11	0.551	0.333	0.218
ENSG00000122729	ACO1	Fibroblast	2.11978e-128	0.402243	7.75606e-124	0.362	0.144	0.218
ENSG00000002330	BAD	Fibroblast	4.45864e-75	0.444192	1.63137e-70	0.592	0.375	0.217
ENSG00000272368	AC074032.1	Fibroblast	5.84882e-96	0.414042	2.14002e-91	0.415	0.198	0.217
ENSG00000128512	DOCK4	Fibroblast	1.47794e-136	0.464383	5.40763e-132	0.473	0.258	0.215
ENSG00000213614	HEXA	Fibroblast	8.48989e-56	0.500612	3.10637e-51	0.6	0.385	0.215
ENSG00000107957	SH3PXD2A	Fibroblast	1.5615e-68	0.401427	5.71337e-64	0.407	0.193	0.214
ENSG00000146457	WTAP	Fibroblast	1.39193e-176	0.782368	5.09293e-172	0.687	0.473	0.214
ENSG00000163453	IGFBP7	Fibroblast	1.38555e-205	0.715764	5.06959e-201	0.241	0.027	0.214
ENSG00000168487	BMP1	Fibroblast	1.6336e-168	0.343863	5.97719e-164	0.265	0.051	0.214
ENSG00000170921	TANC2	Fibroblast	1.07081e-144	0.533907	3.91798e-140	0.591	0.377	0.214
ENSG00000182492	BGN	Fibroblast	6.91709e-206	0.393621	2.5309e-201	0.252	0.038	0.214
ENSG00000123094	RASSF8	Fibroblast	2.81785e-179	0.442705	1.03102e-174	0.393	0.18	0.213
ENSG00000173917	HOXB2	Fibroblast	3.20023e-200	0.338318	1.17093e-195	0.245	0.032	0.213
ENSG00000110811	P3H3	Fibroblast	2.9211e-146	0.374014	1.0688e-141	0.345	0.133	0.212
ENSG00000135047	CTSL	Fibroblast	9.98286e-168	0.553875	3.65263e-163	0.552	0.34	0.212
ENSG00000246695	RASSF8-AS1	Fibroblast	6.66723e-175	0.352449	2.43947e-170	0.286	0.074	0.212
ENSG00000134070	IRAK2	Fibroblast	2.02654e-155	0.405273	7.4149e-151	0.233	0.022	0.211
ENSG00000175854	SWI5	Fibroblast	7.51654e-94	0.456153	2.75023e-89	0.595	0.384	0.211
ENSG00000176170	SPHK1	Fibroblast	1.28689e-184	0.388031	4.70859e-180	0.263	0.052	0.211
ENSG00000197982	C1orf122	Fibroblast	3.69171e-175	0.563384	1.35076e-170	0.63	0.419	0.211
ENSG00000067066	SP100	Fibroblast	1.88717e-21	0.320864	6.90496e-17	0.289	0.079	0.21
ENSG00000103485	QPRT	Fibroblast	5.36285e-28	0.68187	1.96221e-23	0.911	0.701	0.21
ENSG00000149932	TMEM219	Fibroblast	1.46232e-08	0.428972	0.000535047	0.614	0.404	0.21
ENSG00000170043	TRAPPC1	Fibroblast	2.09988e-103	0.606712	7.68326e-99	0.77	0.56	0.21
ENSG00000226067	LINC00623	Fibroblast	3.57414e-16	0.317324	1.30774e-11	0.399	0.189	0.21
ENSG00000026508	CD44	Fibroblast	1.1085e-259	0.505138	4.0559e-255	0.349	0.14	0.209
ENSG00000076321	KLHL20	Fibroblast	1.50122e-75	0.452382	5.4928e-71	0.416	0.207	0.209
ENSG00000164442	CITED2	Fibroblast	1.04141e-20	0.413641	3.81042e-16	0.474	0.265	0.209
ENSG00000166073	GPR176	Fibroblast	3.90924e-172	0.389688	1.43035e-167	0.245	0.036	0.209
ENSG00000100284	TOM1	Fibroblast	1.35753e-68	0.360591	4.96705e-64	0.361	0.153	0.208
ENSG00000120820	GLT8D2	Fibroblast	4.2301e-218	0.349995	1.54775e-213	0.252	0.044	0.208
ENSG00000150347	ARID5B	Fibroblast	1.0678e-05	0.493925	0.390698	0.496	0.288	0.208
ENSG00000156587	UBE2L6	Fibroblast	7.04136e-28	0.308908	2.57636e-23	0.304	0.096	0.208
ENSG00000163069	SGCB	Fibroblast	4.89684e-121	0.358267	1.7917e-116	0.356	0.148	0.208
ENSG00000165801	ARHGEF40	Fibroblast	1.80696e-153	0.360278	6.61147e-149	0.243	0.035	0.208
ENSG00000169814	BTD	Fibroblast	1.71589e-69	0.591474	6.27826e-65	0.365	0.157	0.208
ENSG00000186340	THBS2	Fibroblast	1.9131e-96	0.47888	6.99983e-92	0.379	0.171	0.208
ENSG00000163637	PRICKLE2	Fibroblast	1.12543e-103	0.366247	4.11784e-99	0.264	0.057	0.207
ENSG00000166925	TSC22D4	Fibroblast	9.54345e-41	0.336171	3.49185e-36	0.329	0.122	0.207
ENSG00000168398	BDKRB2	Fibroblast	2.67481e-160	0.383508	9.78687e-156	0.223	0.016	0.207
ENSG00000165233	CARD19	Fibroblast	4.2202e-73	0.370769	1.54413e-68	0.398	0.192	0.206
ENSG00000178980	SELENOW	Fibroblast	1.82662e-90	0.572672	6.68341e-86	0.868	0.662	0.206
ENSG00000203778	FAM229B	Fibroblast	2.47523e-178	0.397174	9.05663e-174	0.382	0.176	0.206
ENSG00000083223	TUT7	Fibroblast	1.6888e-81	0.435051	6.17917e-77	0.361	0.156	0.205
ENSG00000171502	COL24A1	Fibroblast	2.5868e-171	0.435004	9.46484e-167	0.249	0.044	0.205
ENSG00000089327	FXYD5	Fibroblast	3.0031e-15	0.344907	1.0988e-10	0.396	0.192	0.204
ENSG00000101096	NFATC2	Fibroblast	8.92232e-117	0.489503	3.26459e-112	0.232	0.028	0.204
ENSG00000149557	FEZ1	Fibroblast	1.5974e-194	0.342179	5.84473e-190	0.322	0.118	0.204
ENSG00000175183	CSRP2	Fibroblast	5.54991e-114	0.553819	2.03066e-109	0.577	0.373	0.204
ENSG00000175938	ORAI3	Fibroblast	1.9761e-29	0.315411	7.23034e-25	0.3	0.096	0.204
ENSG00000204387	SNHG32	Fibroblast	8.94523e-18	0.830079	3.27297e-13	0.863	0.659	0.204
ENSG00000105127	AKAP8	Fibroblast	7.41782e-77	0.625027	2.71411e-72	0.491	0.288	0.203
ENSG00000113615	SEC24A	Fibroblast	7.14931e-66	0.39776	2.61586e-61	0.354	0.151	0.203
ENSG00000145555	MYO10	Fibroblast	1.34869e-97	0.556149	4.93473e-93	0.569	0.366	0.203
ENSG00000243646	IL10RB	Fibroblast	1.79861e-41	0.344974	6.58094e-37	0.347	0.144	0.203
ENSG00000100345	MYH9	Fibroblast	1.48063e-09	0.416825	5.41747e-05	0.541	0.339	0.202
ENSG00000164111	ANXA5	Fibroblast	5.69807e-103	0.59427	2.08487e-98	0.783	0.581	0.202
ENSG00000167617	CDC42EP5	Fibroblast	4.8811e-114	0.310683	1.78595e-109	0.267	0.065	0.202
ENSG00000234883	MIR155HG	Fibroblast	4.97455e-194	0.648843	1.82014e-189	0.243	0.041	0.202
ENSG00000134871	COL4A2	Fibroblast	0	0.675135	9.43072e-307	0.641	0.44	0.201
ENSG00000168938	PPIC	Fibroblast	1.78212e-93	0.331847	6.52059e-89	0.258	0.057	0.201
ENSG00000184226	PCDH9	Fibroblast	4.73307e-169	0.446281	1.73178e-164	0.293	0.092	0.201
ENSG00000184557	SOCS3	Fibroblast	8.0333e-126	0.351102	2.9393e-121	0.227	0.026	0.201
ENSG00000173517	PEAK1	Fibroblast	4.06652e-49	0.461036	1.4879e-44	0.527	0.327	0.2
ENSG00000178695	KCTD12	Fibroblast	4.8068e-227	0.511655	1.75876e-222	0.349	0.149	0.2
ENSG00000228393	LINC01004	Fibroblast	1.52866e-28	0.469238	5.59321e-24	0.395	0.195	0.2
ENSG00000251136	AF117829.1	Fibroblast	4.18315e-56	0.385409	1.53057e-51	0.39	0.19	0.2
ENSG00000080815	PSEN1	Fibroblast	4.42183e-30	0.397412	1.6179e-25	0.442	0.243	0.199
ENSG00000169554	ZEB2	Fibroblast	0	0.522468	0	0.453	0.254	0.199
ENSG00000250116	AC018682.1	Fibroblast	3.26226e-136	0.360443	1.19363e-131	0.237	0.038	0.199
ENSG00000095752	IL11	Fibroblast	1.23237e-184	0.449507	4.50911e-180	0.21	0.012	0.198
ENSG00000107159	CA9	Fibroblast	4.15684e-08	0.42841	0.00152095	0.443	0.245	0.198
ENSG00000116044	NFE2L2	Fibroblast	6.28757e-26	0.513655	2.30056e-21	0.631	0.433	0.198
ENSG00000123358	NR4A1	Fibroblast	1.3759e-13	0.33633	5.0343e-09	0.361	0.163	0.198
ENSG00000137267	TUBB2A	Fibroblast	1.4411e-134	0.527894	5.27283e-130	0.568	0.37	0.198
ENSG00000147400	CETN2	Fibroblast	3.43086e-25	0.395686	1.25532e-20	0.493	0.295	0.198
ENSG00000165915	SLC39A13	Fibroblast	1.37371e-152	0.335583	5.02629e-148	0.307	0.109	0.198
ENSG00000236975	LINC02814	Fibroblast	1.88192e-14	0.275366	6.88576e-10	0.314	0.116	0.198
ENSG00000099992	TBC1D10A	Fibroblast	4.79765e-87	0.306921	1.75541e-82	0.248	0.051	0.197
ENSG00000156804	FBXO32	Fibroblast	1.1076e-90	0.675428	4.05259e-86	0.25	0.053	0.197
ENSG00000162434	JAK1	Fibroblast	7.26979e-90	0.484183	2.65994e-85	0.586	0.389	0.197
ENSG00000164054	SHISA5	Fibroblast	1.32544e-18	0.399307	4.84964e-14	0.566	0.369	0.197
ENSG00000177879	AP3S1	Fibroblast	2.93627e-15	0.516064	1.07435e-10	0.753	0.556	0.197
ENSG00000213722	DDAH2	Fibroblast	3.14227e-19	0.278989	1.14973e-14	0.452	0.255	0.197
ENSG00000130202	NECTIN2	Fibroblast	7.75099e-27	0.255884	2.83601e-22	0.423	0.227	0.196
ENSG00000166333	ILK	Fibroblast	4.13077e-27	0.372985	1.51141e-22	0.478	0.282	0.196
ENSG00000172201	ID4	Fibroblast	4.14961e-05	0.328814	1	0.361	0.165	0.196
ENSG00000117139	KDM5B	Fibroblast	5.63233e-08	0.343205	0.00206081	0.5	0.305	0.195
ENSG00000146112	PPP1R18	Fibroblast	6.18722e-126	0.296202	2.26384e-121	0.234	0.039	0.195
ENSG00000121851	POLR3GL	Fibroblast	7.29039e-53	0.364366	2.66748e-48	0.424	0.23	0.194
ENSG00000171444	MCC	Fibroblast	2.48161e-140	0.375753	9.07997e-136	0.35	0.156	0.194
ENSG00000071553	ATP6AP1	Fibroblast	3.25663e-20	0.362488	1.19157e-15	0.493	0.3	0.193
ENSG00000172986	GXYLT2	Fibroblast	4.55283e-139	0.362096	1.66583e-134	0.314	0.121	0.193
ENSG00000204520	MICA	Fibroblast	1.62978e-70	0.288069	5.9632e-66	0.255	0.062	0.193
ENSG00000050165	DKK3	Fibroblast	2.45224e-93	0.299965	8.97249e-89	0.227	0.035	0.192
ENSG00000090530	P3H2	Fibroblast	1.43462e-57	0.348483	5.24912e-53	0.261	0.069	0.192
ENSG00000116741	RGS2	Fibroblast	2.37674e-10	0.454813	8.69627e-06	0.331	0.139	0.192
ENSG00000134954	ETS1	Fibroblast	4.55166e-137	0.330767	1.66541e-132	0.217	0.025	0.192
ENSG00000143387	CTSK	Fibroblast	1.32743e-194	0.403154	4.85693e-190	0.203	0.011	0.192
ENSG00000173559	NABP1	Fibroblast	2.73577e-44	0.296302	1.00099e-39	0.281	0.089	0.192
ENSG00000243749	TMEM35B	Fibroblast	9.90218e-41	0.317614	3.62311e-36	0.297	0.105	0.192
ENSG00000007237	GAS7	Fibroblast	2.34848e-148	0.333736	8.59285e-144	0.242	0.051	0.191
ENSG00000103187	COTL1	Fibroblast	2.3189e-217	0.492342	8.48463e-213	0.733	0.542	0.191
ENSG00000104213	PDGFRL	Fibroblast	1.40527e-98	0.353922	5.14175e-94	0.234	0.043	0.191
ENSG00000148180	GSN	Fibroblast	7.83229e-14	0.258326	2.86576e-09	0.351	0.16	0.191
ENSG00000159167	STC1	Fibroblast	8.83e-39	0.417231	3.23081e-34	0.314	0.123	0.191
ENSG00000159200	RCAN1	Fibroblast	3.02445e-37	0.43521	1.10662e-32	0.346	0.155	0.191
ENSG00000239779	WBP1	Fibroblast	1.09584e-18	0.296471	4.00957e-14	0.374	0.183	0.191
ENSG00000071282	LMCD1	Fibroblast	1.32893e-69	0.617267	4.86244e-65	0.308	0.118	0.19
ENSG00000134352	IL6ST	Fibroblast	1.2227e-23	0.318401	4.47372e-19	0.383	0.193	0.19
ENSG00000146374	RSPO3	Fibroblast	7.61057e-170	0.372142	2.78463e-165	0.213	0.023	0.19
ENSG00000185261	KIAA0825	Fibroblast	1.38323e-21	0.367962	5.06111e-17	0.34	0.15	0.19
ENSG00000104765	BNIP3L	Fibroblast	6.79094e-11	0.327477	2.48474e-06	0.531	0.342	0.189
ENSG00000149506	ZP1	Fibroblast	1.08144e-208	0.328717	3.95689e-204	0.194	0.005	0.189
ENSG00000008405	CRY1	Fibroblast	3.73596e-27	0.435931	1.36695e-22	0.517	0.329	0.188
ENSG00000050344	NFE2L3	Fibroblast	4.94302e-08	0.593317	0.0018086	0.535	0.347	0.188
ENSG00000110011	DNAJC4	Fibroblast	4.19427e-19	0.319403	1.53464e-14	0.432	0.244	0.188
ENSG00000122359	ANXA11	Fibroblast	2.10078e-16	0.280829	7.68655e-12	0.468	0.28	0.188
ENSG00000122507	BBS9	Fibroblast	5.1472e-68	0.320136	1.88331e-63	0.369	0.181	0.188
ENSG00000132581	SDF2	Fibroblast	4.12899e-39	0.354491	1.51076e-34	0.469	0.281	0.188
ENSG00000137207	YIPF3	Fibroblast	3.82349e-60	0.427245	1.39898e-55	0.585	0.397	0.188
ENSG00000100219	XBP1	Fibroblast	8.36963e-80	0.324162	3.06236e-75	0.713	0.526	0.187
ENSG00000197448	GSTK1	Fibroblast	9.23594e-31	0.372839	3.37934e-26	0.553	0.366	0.187
ENSG00000107175	CREB3	Fibroblast	3.86553e-45	0.312226	1.41436e-40	0.354	0.168	0.186
ENSG00000171951	SCG2	Fibroblast	3.61075e-102	0.632379	1.32114e-97	0.208	0.022	0.186
ENSG00000173156	RHOD	Fibroblast	5.64707e-72	0.290022	2.06621e-67	0.285	0.099	0.186
ENSG00000205403	CFI	Fibroblast	4.99319e-41	0.315553	1.82696e-36	0.243	0.057	0.186
ENSG00000101134	DOK5	Fibroblast	4.33079e-180	0.343065	1.58459e-175	0.225	0.04	0.185
ENSG00000113389	NPR3	Fibroblast	4.7769e-216	0.419574	1.74782e-211	0.261	0.076	0.185
ENSG00000131018	SYNE1	Fibroblast	2.79239e-17	0.327359	1.02171e-12	0.373	0.188	0.185
ENSG00000143341	HMCN1	Fibroblast	1.53968e-172	0.355443	5.63353e-168	0.22	0.035	0.185
ENSG00000164236	ANKRD33B	Fibroblast	2.40328e-151	0.380528	8.79336e-147	0.217	0.032	0.185
ENSG00000100292	HMOX1	Fibroblast	4.63253e-25	0.358961	1.695e-20	0.269	0.085	0.184
ENSG00000135862	LAMC1	Fibroblast	9.82682e-49	0.448529	3.59554e-44	0.518	0.334	0.184
ENSG00000157020	SEC13	Fibroblast	2.11621e-81	0.44429	7.74302e-77	0.573	0.389	0.184
ENSG00000184840	TMED9	Fibroblast	8.95519e-78	0.720369	3.27661e-73	0.87	0.686	0.184
ENSG00000104805	NUCB1	Fibroblast	3.4418e-23	0.386209	1.25932e-18	0.556	0.373	0.183
ENSG00000116209	TMEM59	Fibroblast	4.68556e-34	0.4756	1.7144e-29	0.77	0.587	0.183
ENSG00000117525	F3	Fibroblast	8.54011e-69	0.450295	3.12474e-64	0.224	0.041	0.183
ENSG00000049540	ELN	Fibroblast	1.1958e-180	0.551857	4.37533e-176	0.193	0.011	0.182
ENSG00000139624	CERS5	Fibroblast	1.784e-95	0.349607	6.52749e-91	0.418	0.236	0.182
ENSG00000171310	CHST11	Fibroblast	4.43494e-151	0.36445	1.6227e-146	0.287	0.105	0.182
ENSG00000185215	TNFAIP2	Fibroblast	1.01573e-158	0.451627	3.71647e-154	0.197	0.015	0.182
ENSG00000213949	ITGA1	Fibroblast	6.06336e-178	0.314774	2.21852e-173	0.196	0.014	0.182
ENSG00000237125	HAND2-AS1	Fibroblast	4.80929e-181	0.316576	1.75967e-176	0.232	0.05	0.182
ENSG00000010626	LRRC23	Fibroblast	1.13983e-07	0.369227	0.00417053	0.4	0.219	0.181
ENSG00000096060	FKBP5	Fibroblast	0	0.606815	0	0.534	0.353	0.181
ENSG00000131016	AKAP12	Fibroblast	0	0.616738	0	0.631	0.45	0.181
ENSG00000187446	CHP1	Fibroblast	1.53898e-18	0.318526	5.63096e-14	0.335	0.154	0.181
ENSG00000189409	MMP23B	Fibroblast	1.4507e-177	0.348005	5.30795e-173	0.208	0.027	0.181
ENSG00000250742	LINC02381	Fibroblast	1.01123e-190	0.321081	3.69999e-186	0.258	0.077	0.181
ENSG00000265808	SEC22B	Fibroblast	1.26108e-40	0.354296	4.61415e-36	0.433	0.252	0.181
ENSG00000285744	AC083837.1	Fibroblast	3.0103e-109	0.569382	1.10144e-104	0.196	0.015	0.181
ENSG00000110852	CLEC2B	Fibroblast	4.33253e-169	0.370979	1.58523e-164	0.19	0.01	0.18
ENSG00000144445	KANSL1L	Fibroblast	3.23076e-41	0.339752	1.1821e-36	0.325	0.145	0.18
ENSG00000161203	AP2M1	Fibroblast	0	0.918084	0	0.913	0.733	0.18
ENSG00000179163	FUCA1	Fibroblast	1.75072e-14	0.324067	6.40572e-10	0.289	0.109	0.18
ENSG00000026103	FAS	Fibroblast	2.45046e-119	0.286853	8.96599e-115	0.219	0.04	0.179
ENSG00000121064	SCPEP1	Fibroblast	2.79276e-93	0.315062	1.02184e-88	0.284	0.105	0.179
ENSG00000148841	ITPRIP	Fibroblast	3.75043e-140	0.330222	1.37225e-135	0.215	0.036	0.179
ENSG00000170801	HTRA3	Fibroblast	4.74789e-170	0.670326	1.7372e-165	0.194	0.015	0.179
ENSG00000196189	SEMA4A	Fibroblast	1.24248e-30	0.34838	4.5461e-26	0.231	0.052	0.179
ENSG00000198682	PAPSS2	Fibroblast	1.86522e-59	0.277337	6.82464e-55	0.257	0.078	0.179
ENSG00000115935	WIPF1	Fibroblast	4.66464e-115	0.298183	1.70675e-110	0.252	0.074	0.178
ENSG00000160161	CILP2	Fibroblast	2.87954e-163	0.333854	1.05359e-158	0.195	0.017	0.178
ENSG00000162909	CAPN2	Fibroblast	5.49227e-132	0.387153	2.00956e-127	0.474	0.296	0.178
ENSG00000068903	SIRT2	Fibroblast	2.4454e-31	0.312937	8.94747e-27	0.409	0.232	0.177
ENSG00000099331	MYO9B	Fibroblast	4.35499e-100	0.388678	1.59345e-95	0.358	0.181	0.177
ENSG00000116157	GPX7	Fibroblast	9.75416e-293	0.438886	3.56895e-288	0.561	0.384	0.177
ENSG00000118515	SGK1	Fibroblast	1.12515e-23	0.332627	4.1168e-19	0.233	0.056	0.177
ENSG00000134369	NAV1	Fibroblast	6.53593e-87	0.335137	2.39143e-82	0.315	0.138	0.177
ENSG00000205352	PRR13	Fibroblast	2.28591e-22	0.333639	8.36392e-18	0.643	0.466	0.177
ENSG00000073756	PTGS2	Fibroblast	1.38599e-141	0.372284	5.07119e-137	0.185	0.009	0.176
ENSG00000078808	SDF4	Fibroblast	2.13714e-66	0.409393	7.81959e-62	0.571	0.395	0.176
ENSG00000122707	RECK	Fibroblast	5.93934e-154	0.320349	2.17314e-149	0.336	0.16	0.176
ENSG00000136247	ZDHHC4	Fibroblast	5.55029e-40	0.341061	2.0308e-35	0.433	0.257	0.176
ENSG00000139174	PRICKLE1	Fibroblast	4.56909e-165	0.363895	1.67178e-160	0.272	0.096	0.176
ENSG00000165124	SVEP1	Fibroblast	1.36157e-142	0.3533	4.98186e-138	0.197	0.021	0.176
ENSG00000233237	LINC00472	Fibroblast	2.79959e-295	0.78487	1.02434e-290	0.622	0.446	0.176
ENSG00000147257	GPC3	Fibroblast	0	1.87363	0	0.558	0.383	0.175
ENSG00000169902	TPST1	Fibroblast	3.52259e-39	0.358341	1.28888e-34	0.455	0.28	0.175
ENSG00000228436	AL139260.1	Fibroblast	7.48043e-63	0.312211	2.73702e-58	0.308	0.133	0.175
ENSG00000070087	PFN2	Fibroblast	5.71661e-121	0.602765	2.09165e-116	0.784	0.61	0.174
ENSG00000137965	IFI44	Fibroblast	3.02463e-98	0.276799	1.10668e-93	0.197	0.023	0.174
ENSG00000143369	ECM1	Fibroblast	2.86465e-172	0.337064	1.04815e-167	0.185	0.011	0.174
ENSG00000088826	SMOX	Fibroblast	5.75884e-47	0.284721	2.1071e-42	0.23	0.057	0.173
ENSG00000123728	RAP2C	Fibroblast	5.08558e-50	0.32782	1.86076e-45	0.298	0.125	0.173
ENSG00000137509	PRCP	Fibroblast	8.86317e-28	0.356183	3.24294e-23	0.464	0.291	0.173
ENSG00000163512	AZI2	Fibroblast	1.02516e-68	0.342419	3.75096e-64	0.445	0.272	0.173
ENSG00000188153	COL4A5	Fibroblast	5.65447e-184	0.37652	2.06892e-179	0.394	0.221	0.173
ENSG00000242802	AP5Z1	Fibroblast	2.92858e-39	0.366363	1.07154e-34	0.312	0.139	0.173
ENSG00000049860	HEXB	Fibroblast	0.00443833	0.361912	1	0.507	0.335	0.172
ENSG00000062716	VMP1	Fibroblast	2.56529e-124	0.251847	9.38614e-120	0.701	0.529	0.172
ENSG00000115129	TP53I3	Fibroblast	1.19807e-34	0.309317	4.3836e-30	0.393	0.221	0.172
ENSG00000148248	SURF4	Fibroblast	1.36908e-64	0.43445	5.00934e-60	0.622	0.45	0.172
ENSG00000164096	C4orf3	Fibroblast	4.64926e-177	0.365938	1.70112e-172	0.907	0.735	0.172
ENSG00000223865	HLA-DPB1	Fibroblast	3.51374e-105	0.253466	1.28564e-100	0.199	0.027	0.172
ENSG00000119138	KLF9	Fibroblast	4.69701e-166	0.297439	1.71859e-161	0.227	0.056	0.171
ENSG00000172663	TMEM134	Fibroblast	3.80513e-19	0.315563	1.39226e-14	0.481	0.31	0.171
ENSG00000102760	RGCC	Fibroblast	8.03203e-86	0.413369	2.93884e-81	0.24	0.07	0.17
ENSG00000186395	KRT10	Fibroblast	1.33278e-63	0.648153	4.87651e-59	0.864	0.694	0.17
ENSG00000214194	SMIM30	Fibroblast	8.54599e-16	0.368568	3.12689e-11	0.58	0.41	0.17
ENSG00000041982	TNC	Fibroblast	1.3329e-93	0.708273	4.87695e-89	0.199	0.03	0.169
ENSG00000079739	PGM1	Fibroblast	5.90033e-05	0.34823	1	0.571	0.402	0.169
ENSG00000102401	ARMCX3	Fibroblast	1.09994e-11	0.316355	4.02457e-07	0.446	0.277	0.169
ENSG00000115525	ST3GAL5	Fibroblast	7.7342e-112	0.359006	2.82987e-107	0.208	0.039	0.169
ENSG00000177311	ZBTB38	Fibroblast	0.0001793	0.284922	1	0.341	0.172	0.169
ENSG00000092096	SLC22A17	Fibroblast	7.40245e-63	0.261535	2.70848e-58	0.23	0.062	0.168
ENSG00000106772	PRUNE2	Fibroblast	1.06999e-89	0.357936	3.91497e-85	0.241	0.073	0.168
ENSG00000120896	SORBS3	Fibroblast	2.0649e-60	0.277553	7.55525e-56	0.336	0.168	0.168
ENSG00000156639	ZFAND3	Fibroblast	8.82841e-87	0.492452	3.23023e-82	0.772	0.604	0.168
ENSG00000157593	SLC35B2	Fibroblast	2.25171e-26	0.262818	8.23877e-22	0.32	0.152	0.168
ENSG00000170891	CYTL1	Fibroblast	1.85356e-150	0.370247	6.782e-146	0.189	0.021	0.168
ENSG00000197858	GPAA1	Fibroblast	7.26798e-70	0.356145	2.65928e-65	0.468	0.3	0.168
ENSG00000250616	AC012645.1	Fibroblast	7.1373e-19	0.318477	2.61147e-14	0.505	0.337	0.168
ENSG00000130733	YIPF2	Fibroblast	1.25365e-28	0.306146	4.58699e-24	0.401	0.234	0.167
ENSG00000149357	LAMTOR1	Fibroblast	7.73752e-121	0.552503	2.83108e-116	0.797	0.63	0.167
ENSG00000166920	C15orf48	Fibroblast	1.15974e-72	0.370075	4.24338e-68	0.194	0.027	0.167
ENSG00000172922	RNASEH2C	Fibroblast	9.89497e-150	0.513911	3.62047e-145	0.71	0.543	0.167
ENSG00000086598	TMED2	Fibroblast	4.34961e-12	0.571884	1.59148e-07	0.806	0.64	0.166
ENSG00000114423	CBLB	Fibroblast	1.2361e-67	0.387089	4.52278e-63	0.414	0.248	0.166
ENSG00000158246	TENT5B	Fibroblast	2.2261e-19	0.318641	8.14509e-15	0.227	0.061	0.166
ENSG00000164741	DLC1	Fibroblast	1.53798e-46	0.293061	5.62732e-42	0.269	0.103	0.166
ENSG00000109113	RAB34	Fibroblast	3.72405e-125	0.403018	1.36259e-120	0.642	0.477	0.165
ENSG00000110492	MDK	Fibroblast	0	1.62836	0	0.899	0.734	0.165
ENSG00000129009	ISLR	Fibroblast	3.77593e-194	0.333719	1.38157e-189	0.167	0.002	0.165
ENSG00000130176	CNN1	Fibroblast	4.32371e-115	0.317634	1.582e-110	0.191	0.026	0.165
ENSG00000134363	FST	Fibroblast	1.85744e-141	0.391005	6.79618e-137	0.189	0.024	0.165
ENSG00000137409	MTCH1	Fibroblast	7.58457e-256	0.703792	2.77512e-251	0.891	0.726	0.165
ENSG00000286153	AP000331.1	Fibroblast	1.93005e-67	0.487181	7.06184e-63	0.207	0.042	0.165
ENSG00000111321	LTBR	Fibroblast	5.76219e-35	0.254671	2.10833e-30	0.213	0.049	0.164
ENSG00000123342	MMP19	Fibroblast	1.49188e-193	0.302275	5.45866e-189	0.166	0.002	0.164
ENSG00000134851	TMEM165	Fibroblast	3.53262e-94	0.477312	1.29255e-89	0.626	0.462	0.164
ENSG00000144824	PHLDB2	Fibroblast	3.60157e-42	0.270602	1.31778e-37	0.226	0.062	0.164
ENSG00000145779	TNFAIP8	Fibroblast	2.81611e-34	0.392417	1.03039e-29	0.365	0.201	0.164
ENSG00000160801	PTH1R	Fibroblast	1.32585e-154	0.279994	4.85116e-150	0.199	0.035	0.164
ENSG00000111145	ELK3	Fibroblast	1.09515e-97	0.260854	4.00705e-93	0.201	0.038	0.163
ENSG00000120675	DNAJC15	Fibroblast	6.34385e-124	0.383528	2.32115e-119	0.18	0.017	0.163
ENSG00000140941	MAP1LC3B	Fibroblast	1.48751e-10	0.362748	5.44265e-06	0.64	0.477	0.163
ENSG00000174482	LINGO2	Fibroblast	2.84767e-66	0.303666	1.04193e-61	0.25	0.087	0.163
ENSG00000185883	ATP6V0C	Fibroblast	3.26375e-79	0.615219	1.19417e-74	0.87	0.707	0.163
ENSG00000101825	MXRA5	Fibroblast	6.1564e-177	0.281766	2.25257e-172	0.17	0.008	0.162
ENSG00000106605	BLVRA	Fibroblast	1.2754e-92	0.315654	4.66654e-88	0.36	0.198	0.162
ENSG00000109107	ALDOC	Fibroblast	2.66854e-11	0.251522	9.76391e-07	0.357	0.195	0.162
ENSG00000111885	MAN1A1	Fibroblast	3.5828e-10	0.301516	1.31091e-05	0.285	0.123	0.162
ENSG00000135090	TAOK3	Fibroblast	2.15311e-56	0.30591	7.87801e-52	0.375	0.213	0.162
ENSG00000042062	RIPOR3	Fibroblast	2.74705e-98	0.280659	1.00512e-93	0.18	0.019	0.161
ENSG00000103507	BCKDK	Fibroblast	9.34799e-50	0.355532	3.42034e-45	0.508	0.347	0.161
ENSG00000122218	COPA	Fibroblast	7.57604e-97	0.411238	2.772e-92	0.568	0.407	0.161
ENSG00000184347	SLIT3	Fibroblast	2.16371e-205	0.403272	7.91679e-201	0.213	0.052	0.161
ENSG00000125968	ID1	Fibroblast	9.04745e-17	0.947733	3.31037e-12	0.801	0.641	0.16
ENSG00000153071	DAB2	Fibroblast	3.32509e-58	0.259122	1.21662e-53	0.206	0.046	0.16
ENSG00000137285	TUBB2B	Fibroblast	7.37511e-285	0.643612	2.69848e-280	0.885	0.726	0.159
ENSG00000171451	DSEL	Fibroblast	1.81608e-97	0.287873	6.64485e-93	0.229	0.07	0.159
ENSG00000173926	MARCH3	Fibroblast	1.4879e-09	0.324353	5.44406e-05	0.306	0.147	0.159
ENSG00000197959	DNM3	Fibroblast	1.8641e-95	0.304305	6.82056e-91	0.23	0.071	0.159
ENSG00000010270	STARD3NL	Fibroblast	7.83978e-36	0.300356	2.8685e-31	0.427	0.269	0.158
ENSG00000074590	NUAK1	Fibroblast	4.2043e-143	0.340595	1.53831e-138	0.269	0.111	0.158
ENSG00000118257	NRP2	Fibroblast	3.47144e-136	0.398708	1.27017e-131	0.391	0.233	0.158
ENSG00000130429	ARPC1B	Fibroblast	7.15027e-14	0.261537	2.61621e-09	0.451	0.293	0.158
ENSG00000086666	ZFAND6	Fibroblast	2.14951e-14	0.294936	7.86484e-10	0.591	0.434	0.157
ENSG00000090487	SPG21	Fibroblast	2.06688e-39	0.428538	7.5625e-35	0.629	0.472	0.157
ENSG00000162924	REL	Fibroblast	1.91285e-24	0.322143	6.99891e-20	0.366	0.209	0.157
ENSG00000164107	HAND2	Fibroblast	3.43597e-163	0.281727	1.25719e-158	0.2	0.043	0.157
ENSG00000166923	GREM1	Fibroblast	2.63211e-155	0.307392	9.63063e-151	0.172	0.015	0.157
ENSG00000170961	HAS2	Fibroblast	8.90251e-130	0.301753	3.25734e-125	0.18	0.023	0.157
ENSG00000176973	FAM89B	Fibroblast	1.99023e-94	0.304962	7.28205e-90	0.341	0.184	0.157
ENSG00000254560	BBOX1-AS1	Fibroblast	1.89051e-30	0.269824	6.91719e-26	0.344	0.187	0.157
ENSG00000123352	SPATS2	Fibroblast	7.011e-58	0.363091	2.56526e-53	0.56	0.404	0.156
ENSG00000125629	INSIG2	Fibroblast	0.0013082	0.320625	1	0.394	0.238	0.156
ENSG00000138085	ATRAID	Fibroblast	2.5581e-57	0.518271	9.35983e-53	0.778	0.622	0.156
ENSG00000173846	PLK3	Fibroblast	2.91328e-55	0.264114	1.06594e-50	0.223	0.067	0.156
ENSG00000004776	HSPB6	Fibroblast	1.46597e-177	0.337741	5.36382e-173	0.16	0.005	0.155
ENSG00000115183	TANC1	Fibroblast	9.21197e-112	0.398132	3.37057e-107	0.488	0.333	0.155
ENSG00000153823	PID1	Fibroblast	9.48581e-111	0.298822	3.47076e-106	0.178	0.023	0.155
ENSG00000116667	C1orf21	Fibroblast	7.98376e-187	0.433081	2.92118e-182	0.468	0.314	0.154
ENSG00000128713	HOXD11	Fibroblast	2.61999e-136	0.251509	9.58627e-132	0.162	0.008	0.154
ENSG00000136052	SLC41A2	Fibroblast	7.73436e-44	0.281361	2.82993e-39	0.242	0.088	0.154
ENSG00000165966	PDZRN4	Fibroblast	3.42263e-140	0.413305	1.25231e-135	0.181	0.027	0.154
ENSG00000171992	SYNPO	Fibroblast	1.31729e-129	0.268367	4.81983e-125	0.167	0.013	0.154
ENSG00000185896	LAMP1	Fibroblast	2.74889e-44	0.364227	1.00579e-39	0.556	0.402	0.154
ENSG00000102786	INTS6	Fibroblast	1.50604e-06	0.36677	0.0551045	0.482	0.329	0.153
ENSG00000106397	PLOD3	Fibroblast	2.311e-77	0.31409	8.45573e-73	0.354	0.201	0.153
ENSG00000112977	DAP	Fibroblast	6.25919e-66	0.299665	2.29018e-61	0.406	0.253	0.153
ENSG00000132932	ATP8A2	Fibroblast	5.87329e-141	0.351925	2.14898e-136	0.168	0.015	0.153
ENSG00000230148	HOXB-AS1	Fibroblast	4.71816e-152	0.27349	1.72633e-147	0.165	0.012	0.153
ENSG00000107201	DDX58	Fibroblast	4.00955e-57	0.251332	1.46705e-52	0.2	0.048	0.152
ENSG00000137868	STRA6	Fibroblast	1.10928e-34	0.319773	4.05873e-30	0.211	0.059	0.152
ENSG00000151572	ANO4	Fibroblast	9.28917e-179	0.372432	3.39882e-174	0.208	0.056	0.152
ENSG00000181929	PRKAG1	Fibroblast	1.65674e-29	0.273216	6.06186e-25	0.375	0.223	0.152
ENSG00000184164	CRELD2	Fibroblast	3.81352e-78	0.28086	1.39533e-73	0.321	0.169	0.152
ENSG00000185112	FAM43A	Fibroblast	3.39754e-103	0.287463	1.24313e-98	0.177	0.025	0.152
ENSG00000153707	PTPRD	Fibroblast	7.57678e-167	0.323796	2.77227e-162	0.439	0.288	0.151
ENSG00000196739	COL27A1	Fibroblast	2.06467e-21	0.258902	7.55443e-17	0.274	0.123	0.151
ENSG00000058668	ATP2B4	Fibroblast	1.45071e-89	0.33935	5.308e-85	0.334	0.184	0.15
ENSG00000118985	ELL2	Fibroblast	4.53989e-06	0.289423	0.16611	0.328	0.178	0.15
ENSG00000131446	MGAT1	Fibroblast	9.38203e-58	0.292793	3.43279e-53	0.375	0.225	0.15
ENSG00000170791	CHCHD7	Fibroblast	1.02625e-07	0.287362	0.00375494	0.465	0.315	0.15
ENSG00000185950	IRS2	Fibroblast	4.41814e-44	0.325522	1.61655e-39	0.32	0.17	0.15
ENSG00000107372	ZFAND5	Fibroblast	5.01983e-09	0.386415	0.000183671	0.583	0.434	0.149
ENSG00000120709	FAM53C	Fibroblast	3.66527e-11	0.282085	1.34108e-06	0.321	0.172	0.149
ENSG00000135535	CD164	Fibroblast	3.51619e-15	0.264873	1.28654e-10	0.604	0.455	0.149
ENSG00000152049	KCNE4	Fibroblast	5.34005e-135	0.282211	1.95387e-130	0.16	0.011	0.149
ENSG00000163602	RYBP	Fibroblast	8.65243e-17	0.282423	3.16584e-12	0.412	0.263	0.149
ENSG00000019144	PHLDB1	Fibroblast	3.73101e-126	0.318758	1.36514e-121	0.225	0.077	0.148
ENSG00000160310	PRMT2	Fibroblast	1.61572e-25	0.327687	5.91177e-21	0.477	0.329	0.148
ENSG00000197442	MAP3K5	Fibroblast	1.10207e-141	0.452453	4.03236e-137	0.258	0.11	0.148
ENSG00000068912	ERLEC1	Fibroblast	7.85468e-37	0.314604	2.87395e-32	0.419	0.272	0.147
ENSG00000100926	TM9SF1	Fibroblast	1.75024e-19	0.254892	6.40396e-15	0.324	0.177	0.147
ENSG00000121297	TSHZ3	Fibroblast	1.92881e-134	0.254949	7.05731e-130	0.175	0.028	0.147
ENSG00000166016	ABTB2	Fibroblast	9.29305e-11	0.355522	3.40023e-06	0.274	0.127	0.147
ENSG00000075785	RAB7A	Fibroblast	5.41481e-126	0.871929	1.98123e-121	0.894	0.748	0.146
ENSG00000124942	AHNAK	Fibroblast	4.7698e-66	0.271817	1.74522e-61	0.302	0.156	0.146
ENSG00000137857	DUOX1	Fibroblast	5.49999e-37	0.257483	2.01239e-32	0.195	0.049	0.146
ENSG00000242247	ARFGAP3	Fibroblast	9.09102e-31	0.270758	3.32631e-26	0.343	0.197	0.146
ENSG00000270069	MIR222HG	Fibroblast	5.28028e-34	0.279471	1.932e-29	0.235	0.089	0.146
ENSG00000136634	IL10	Fibroblast	2.45755e-179	0.482129	8.99193e-175	0.146	0.001	0.145
ENSG00000172965	MIR4435-2HG	Fibroblast	0.000865658	0.278161	1	0.351	0.206	0.145
ENSG00000204272	NBDY	Fibroblast	3.15027e-43	0.419604	1.15265e-38	0.749	0.604	0.145
ENSG00000223653	AL078459.1	Fibroblast	4.47426e-20	0.280905	1.63709e-15	0.293	0.148	0.145
ENSG00000012660	ELOVL5	Fibroblast	1.49405e-85	0.514344	5.46658e-81	0.551	0.407	0.144
ENSG00000069956	MAPK6	Fibroblast	7.17908e-32	0.358172	2.62675e-27	0.518	0.374	0.144
ENSG00000120686	UFM1	Fibroblast	2.12397e-17	0.351163	7.77138e-13	0.663	0.519	0.144
ENSG00000148444	COMMD3	Fibroblast	1.54472e-16	0.302824	5.65199e-12	0.465	0.321	0.144
ENSG00000203805	PLPP4	Fibroblast	1.0821e-255	0.28576	3.95931e-251	0.24	0.096	0.144
ENSG00000013297	CLDN11	Fibroblast	1.64345e-146	0.495734	6.01322e-142	0.237	0.094	0.143
ENSG00000143183	TMCO1	Fibroblast	4.41401e-12	0.430571	1.61504e-07	0.744	0.601	0.143
ENSG00000205129	C4orf47	Fibroblast	1.52693e-48	0.28888	5.58687e-44	0.272	0.129	0.143
ENSG00000008952	SEC62	Fibroblast	2.27996e-08	0.565319	0.000834216	0.832	0.69	0.142
ENSG00000104853	CLPTM1	Fibroblast	3.93684e-27	0.259978	1.44045e-22	0.366	0.224	0.142
ENSG00000105088	OLFM2	Fibroblast	6.31244e-116	0.421825	2.30966e-111	0.287	0.145	0.142
ENSG00000107485	GATA3	Fibroblast	5.58324e-89	0.277634	2.04285e-84	0.167	0.025	0.142
ENSG00000137821	LRRC49	Fibroblast	2.56809e-130	0.420358	9.3964e-126	0.312	0.17	0.142
ENSG00000167543	TP53I13	Fibroblast	1.09845e-36	0.289003	4.01914e-32	0.413	0.271	0.142
ENSG00000187601	MAGEH1	Fibroblast	6.94106e-60	0.268913	2.53967e-55	0.293	0.151	0.142
ENSG00000223745	CCDC18-AS1	Fibroblast	6.23413e-19	0.295981	2.281e-14	0.416	0.274	0.142
ENSG00000250298	GIMD1	Fibroblast	2.69262e-74	0.373042	9.85204e-70	0.233	0.091	0.142
ENSG00000145675	PIK3R1	Fibroblast	9.58735e-69	0.331064	3.50791e-64	0.378	0.237	0.141
ENSG00000158164	TMSB15A	Fibroblast	1.98239e-80	0.282451	7.25335e-76	0.252	0.111	0.141
ENSG00000183117	CSMD1	Fibroblast	8.35812e-111	0.427614	3.05815e-106	0.19	0.049	0.141
ENSG00000285664	AL139317.5	Fibroblast	1.72548e-30	0.251323	6.31336e-26	0.216	0.075	0.141
ENSG00000006128	TAC1	Fibroblast	7.68265e-88	0.494755	2.81101e-83	0.18	0.04	0.14
ENSG00000072364	AFF4	Fibroblast	5.11731e-15	0.363541	1.87237e-10	0.633	0.493	0.14
ENSG00000122862	SRGN	Fibroblast	7.56629e-167	0.476987	2.76843e-162	0.142	0.002	0.14
ENSG00000124588	NQO2	Fibroblast	1.65094e-37	0.260955	6.04062e-33	0.346	0.206	0.14
ENSG00000167604	NFKBID	Fibroblast	5.25851e-89	0.272425	1.92403e-84	0.167	0.027	0.14
ENSG00000097033	SH3GLB1	Fibroblast	0.000207197	0.353442	1	0.557	0.418	0.139
ENSG00000136026	CKAP4	Fibroblast	1.66027e-182	0.390987	6.07478e-178	0.534	0.395	0.139
ENSG00000154856	APCDD1	Fibroblast	8.47728e-154	0.381711	3.10175e-149	0.203	0.064	0.139
ENSG00000169490	TM2D2	Fibroblast	3.05888e-30	0.250986	1.11921e-25	0.378	0.239	0.139
ENSG00000065534	MYLK	Fibroblast	5.91012e-116	0.301219	2.16245e-111	0.184	0.046	0.138
ENSG00000067113	PLPP1	Fibroblast	0.000101066	0.263109	1	0.41	0.272	0.138
ENSG00000079332	SAR1A	Fibroblast	6.23502e-45	0.33498	2.28133e-40	0.549	0.411	0.138
ENSG00000156113	KCNMA1	Fibroblast	2.33616e-151	0.691828	8.54777e-147	0.247	0.109	0.138
ENSG00000171148	TADA3	Fibroblast	1.16876e-33	0.276884	4.27639e-29	0.417	0.279	0.138
ENSG00000035403	VCL	Fibroblast	1.4995e-24	0.309609	5.4865e-20	0.545	0.408	0.137
ENSG00000152413	HOMER1	Fibroblast	4.75321e-10	0.546048	1.73915e-05	0.557	0.42	0.137
ENSG00000170962	PDGFD	Fibroblast	3.81641e-72	0.264296	1.39639e-67	0.187	0.05	0.137
ENSG00000172465	TCEAL1	Fibroblast	3.14686e-75	0.457069	1.1514e-70	0.353	0.216	0.137
ENSG00000182054	IDH2	Fibroblast	8.41205e-53	0.428404	3.07789e-48	0.753	0.616	0.137
ENSG00000031081	ARHGAP31	Fibroblast	4.20925e-108	0.263364	1.54012e-103	0.155	0.019	0.136
ENSG00000125991	ERGIC3	Fibroblast	9.81506e-21	0.538548	3.59123e-16	0.822	0.686	0.136
ENSG00000145817	YIPF5	Fibroblast	1.19955e-30	0.28169	4.38905e-26	0.376	0.24	0.136
ENSG00000178776	C5orf46	Fibroblast	5.31805e-122	0.376967	1.94582e-117	0.141	0.005	0.136
ENSG00000205542	TMSB4X	Fibroblast	0	1.8024	0	0.98	0.844	0.136
ENSG00000249252	AC098829.1	Fibroblast	3.3688e-47	0.262599	1.23261e-42	0.186	0.05	0.136
ENSG00000087884	AAMDC	Fibroblast	1.43239e-11	0.310029	5.24096e-07	0.504	0.369	0.135
ENSG00000168002	POLR2G	Fibroblast	4.31101e-11	0.366804	1.57736e-06	0.691	0.556	0.135
ENSG00000170919	TPT1-AS1	Fibroblast	1.76962e-18	0.251292	6.47486e-14	0.387	0.252	0.135
ENSG00000172354	GNB2	Fibroblast	2.81908e-14	0.408819	1.03147e-09	0.729	0.594	0.135
ENSG00000215483	LINC00598	Fibroblast	5.00362e-103	0.251916	1.83077e-98	0.147	0.012	0.135
ENSG00000058262	SEC61A1	Fibroblast	5.38447e-56	0.301207	1.97012e-51	0.489	0.355	0.134
ENSG00000130208	APOC1	Fibroblast	9.06545e-40	0.613565	3.31696e-35	0.452	0.318	0.134
ENSG00000136560	TANK	Fibroblast	5.62552e-09	0.2611	0.000205832	0.428	0.294	0.134
ENSG00000165029	ABCA1	Fibroblast	3.0863e-101	0.254386	1.12925e-96	0.169	0.035	0.134
ENSG00000182197	EXT1	Fibroblast	0.00879584	0.665291	1	0.672	0.538	0.134
ENSG00000112335	SNX3	Fibroblast	6.87547e-174	0.867111	2.51567e-169	0.948	0.815	0.133
ENSG00000182704	TSKU	Fibroblast	4.22207e-73	0.251451	1.54481e-68	0.224	0.091	0.133
ENSG00000051620	HEBP2	Fibroblast	2.15429e-66	0.442007	7.88233e-62	0.765	0.633	0.132
ENSG00000101608	MYL12A	Fibroblast	1.91555e-28	0.390571	7.00881e-24	0.785	0.653	0.132
ENSG00000103502	CDIPT	Fibroblast	1.57057e-30	0.267742	5.74655e-26	0.38	0.248	0.132
ENSG00000125505	MBOAT7	Fibroblast	0.000407789	0.272021	1	0.39	0.258	0.132
ENSG00000167772	ANGPTL4	Fibroblast	4.52805e-34	0.296358	1.65677e-29	0.169	0.037	0.132
ENSG00000074842	MYDGF	Fibroblast	2.79306e-115	0.626948	1.02195e-110	0.885	0.754	0.131
ENSG00000100644	HIF1A	Fibroblast	3.34793e-114	0.391904	1.22497e-109	0.486	0.355	0.131
ENSG00000127528	KLF2	Fibroblast	1.08936e-125	0.254182	3.98587e-121	0.136	0.005	0.131
ENSG00000148848	ADAM12	Fibroblast	4.50878e-99	0.269199	1.64972e-94	0.158	0.027	0.131
ENSG00000161270	NPHS1	Fibroblast	7.62444e-91	0.32381	2.78971e-86	0.148	0.017	0.131
ENSG00000174695	TMEM167A	Fibroblast	3.5076e-36	0.336876	1.28339e-31	0.602	0.471	0.131
ENSG00000119508	NR4A3	Fibroblast	2.56672e-64	0.269337	9.39139e-60	0.151	0.021	0.13
ENSG00000125148	MT2A	Fibroblast	5.91363e-273	1.22071	2.16374e-268	0.418	0.288	0.13
ENSG00000129562	DAD1	Fibroblast	2.29598e-135	0.544329	8.40077e-131	0.866	0.736	0.13
ENSG00000146477	SLC22A3	Fibroblast	2.80219e-119	0.324475	1.02529e-114	0.14	0.01	0.13
ENSG00000167397	VKORC1	Fibroblast	0	0.887487	0	0.918	0.788	0.13
ENSG00000178053	MLF1	Fibroblast	6.81296e-84	0.299006	2.4928e-79	0.347	0.217	0.13
ENSG00000004799	PDK4	Fibroblast	4.16033e-52	0.343821	1.52222e-47	0.147	0.018	0.129
ENSG00000147065	MSN	Fibroblast	2.8449e-143	0.301043	1.04092e-138	0.357	0.228	0.129
ENSG00000157654	PALM2-AKAP2	Fibroblast	0	0.414191	0	0.559	0.43	0.129
ENSG00000138760	SCARB2	Fibroblast	2.67861e-06	0.285607	0.0980077	0.554	0.426	0.128
ENSG00000105825	TFPI2	Fibroblast	1.04814e-128	0.453585	3.83503e-124	0.156	0.029	0.127
ENSG00000126583	PRKCG	Fibroblast	3.10603e-25	0.286185	1.13647e-20	0.176	0.049	0.127
ENSG00000117616	RSRP1	Fibroblast	5.43043e-39	0.320545	1.98694e-34	0.533	0.407	0.126
ENSG00000104447	TRPS1	Fibroblast	6.02825e-134	0.288072	2.20568e-129	0.469	0.344	0.125
ENSG00000119383	PTPA	Fibroblast	2.3955e-53	0.3039	8.76491e-49	0.343	0.218	0.125
ENSG00000144218	AFF3	Fibroblast	4.08254e-74	0.312851	1.49376e-69	0.266	0.141	0.125
ENSG00000148948	LRRC4C	Fibroblast	8.41713e-115	0.419822	3.07974e-110	0.211	0.086	0.125
ENSG00000168734	PKIG	Fibroblast	3.13124e-104	0.288752	1.14569e-99	0.391	0.266	0.125
ENSG00000185475	TMEM179B	Fibroblast	1.20108e-18	0.250995	4.39464e-14	0.449	0.325	0.124
ENSG00000101955	SRPX	Fibroblast	2.38579e-118	0.27454	8.72937e-114	0.231	0.108	0.123
ENSG00000106211	HSPB1	Fibroblast	1.37064e-202	0.787635	5.01503e-198	0.846	0.723	0.123
ENSG00000133639	BTG1	Fibroblast	2.24239e-91	0.367257	8.20467e-87	0.822	0.699	0.123
ENSG00000158019	BABAM2	Fibroblast	3.53143e-125	0.407724	1.29212e-120	0.592	0.469	0.123
ENSG00000177189	RPS6KA3	Fibroblast	4.62381e-20	0.335941	1.69181e-15	0.405	0.282	0.123
ENSG00000026025	VIM	Fibroblast	0	1.22915	0	0.997	0.875	0.122
ENSG00000146856	AGBL3	Fibroblast	1.72117e-82	0.27682	6.29759e-78	0.203	0.081	0.122
ENSG00000164292	RHOBTB3	Fibroblast	1.82038e-104	0.457262	6.66059e-100	0.755	0.633	0.122
ENSG00000120509	PDZD11	Fibroblast	2.09055e-39	0.269061	7.64911e-35	0.429	0.308	0.121
ENSG00000141449	GREB1L	Fibroblast	9.3869e-108	0.413717	3.43457e-103	0.354	0.233	0.121
ENSG00000120910	PPP3CC	Fibroblast	3.83921e-62	0.252717	1.40473e-57	0.303	0.183	0.12
ENSG00000133961	NUMB	Fibroblast	3.49457e-07	0.256202	0.0127863	0.385	0.265	0.12
ENSG00000141551	CSNK1D	Fibroblast	1.58373e-06	0.251844	0.0579471	0.438	0.318	0.12
ENSG00000177556	ATOX1	Fibroblast	1.62583e-234	0.577714	5.94874e-230	0.87	0.75	0.12
ENSG00000184014	DENND5A	Fibroblast	1.87163e-80	0.35407	6.84811e-76	0.504	0.384	0.12
ENSG00000235169	SMIM1	Fibroblast	1.72273e-06	0.289097	0.0630328	0.232	0.112	0.12
ENSG00000127314	RAP1B	Fibroblast	4.72576e-64	0.433005	1.72911e-59	0.717	0.598	0.119
ENSG00000070214	SLC44A1	Fibroblast	2.12315e-24	0.289261	7.76838e-20	0.336	0.218	0.118
ENSG00000100554	ATP6V1D	Fibroblast	1.53573e-19	0.306318	5.6191e-15	0.613	0.495	0.118
ENSG00000134108	ARL8B	Fibroblast	1.95338e-55	0.272217	7.14721e-51	0.417	0.299	0.118
ENSG00000173432	SAA1	Fibroblast	5.36817e-92	2.13096	1.96416e-87	0.128	0.01	0.118
ENSG00000245532	NEAT1	Fibroblast	1.51105e-84	0.99777	5.52879e-80	0.983	0.865	0.118
ENSG00000253553	AC090578.1	Fibroblast	8.22741e-126	0.264907	3.01033e-121	0.312	0.194	0.118
ENSG00000135919	SERPINE2	Fibroblast	1.42834e-118	0.525989	5.22617e-114	0.277	0.16	0.117
ENSG00000150991	UBC	Fibroblast	1.84771e-72	0.472907	6.76057e-68	0.968	0.851	0.117
ENSG00000170296	GABARAP	Fibroblast	2.59437e-221	1.11416	9.49254e-217	0.975	0.858	0.117
ENSG00000102225	CDK16	Fibroblast	5.55994e-47	0.411558	2.03433e-42	0.536	0.42	0.116
ENSG00000164713	BRI3	Fibroblast	5.15059e-221	0.491885	1.88455e-216	0.839	0.723	0.116
ENSG00000166130	IKBIP	Fibroblast	4.32337e-109	0.268928	1.58188e-104	0.453	0.337	0.116
ENSG00000185630	PBX1	Fibroblast	9.19389e-60	0.365254	3.36395e-55	0.57	0.454	0.116
ENSG00000153317	ASAP1	Fibroblast	1.88705e-262	0.486675	6.90452e-258	0.738	0.623	0.115
ENSG00000166347	CYB5A	Fibroblast	2.47019e-30	0.297358	9.03817e-26	0.592	0.477	0.115
ENSG00000108828	VAT1	Fibroblast	1.27871e-40	0.268892	4.67867e-36	0.418	0.304	0.114
ENSG00000131236	CAP1	Fibroblast	3.51136e-19	0.325785	1.28477e-14	0.623	0.509	0.114
ENSG00000132561	MATN2	Fibroblast	2.36881e-96	0.279851	8.66723e-92	0.136	0.022	0.114
ENSG00000134202	GSTM3	Fibroblast	1.61078e-54	0.323286	5.89369e-50	0.708	0.594	0.114
ENSG00000175550	DRAP1	Fibroblast	3.40431e-119	0.349193	1.2456e-114	0.666	0.552	0.114
ENSG00000070081	NUCB2	Fibroblast	1.57534e-08	0.262336	0.000576402	0.511	0.398	0.113
ENSG00000124875	CXCL6	Fibroblast	8.23874e-95	0.283825	3.01447e-90	0.118	0.005	0.113
ENSG00000137076	TLN1	Fibroblast	5.0994e-135	0.306466	1.86582e-130	0.482	0.369	0.113
ENSG00000164056	SPRY1	Fibroblast	5.1321e-63	0.338685	1.87778e-58	0.323	0.21	0.113
ENSG00000181195	PENK	Fibroblast	1.87006e-108	0.767568	6.84234e-104	0.119	0.006	0.113
ENSG00000196704	AMZ2	Fibroblast	4.93447e-14	0.256378	1.80547e-09	0.411	0.298	0.113
ENSG00000198959	TGM2	Fibroblast	3.54231e-12	0.322356	1.29609e-07	0.146	0.033	0.113
ENSG00000165410	CFL2	Fibroblast	3.65574e-72	0.251517	1.3376e-67	0.389	0.277	0.112
ENSG00000168894	RNF181	Fibroblast	4.04601e-39	0.270037	1.48039e-34	0.658	0.547	0.111
ENSG00000106538	RARRES2	Fibroblast	0	0.973782	0	0.529	0.419	0.11
ENSG00000151694	ADAM17	Fibroblast	2.83483e-52	0.280394	1.03723e-47	0.36	0.251	0.109
ENSG00000160209	PDXK	Fibroblast	1.41635e-42	0.325832	5.18229e-38	0.604	0.495	0.109
ENSG00000163956	LRPAP1	Fibroblast	7.90087e-127	0.481812	2.89085e-122	0.755	0.646	0.109
ENSG00000187239	FNBP1	Fibroblast	1.10404e-56	0.281034	4.03958e-52	0.458	0.349	0.109
ENSG00000196628	TCF4	Fibroblast	0	0.314019	0	0.66	0.551	0.109
ENSG00000198947	DMD	Fibroblast	1.92098e-52	0.279262	7.02867e-48	0.239	0.13	0.109
ENSG00000125037	EMC3	Fibroblast	9.6894e-25	0.281293	3.54525e-20	0.506	0.398	0.108
ENSG00000150394	CDH8	Fibroblast	2.19578e-77	0.291811	8.03415e-73	0.173	0.065	0.108
ENSG00000177697	CD151	Fibroblast	1.14882e-38	0.494131	4.20342e-34	0.702	0.594	0.108
ENSG00000204389	HSPA1A	Fibroblast	5.91347e-06	0.37809	0.216368	0.255	0.147	0.108
ENSG00000111674	ENO2	Fibroblast	5.38141e-12	0.338948	1.96901e-07	0.463	0.356	0.107
ENSG00000017427	IGF1	Fibroblast	4.98294e-58	0.34399	1.82321e-53	0.123	0.017	0.106
ENSG00000101871	MID1	Fibroblast	1.95967e-30	0.270224	7.17024e-26	0.416	0.31	0.106
ENSG00000139644	TMBIM6	Fibroblast	5.81415e-12	0.336586	2.12734e-07	0.842	0.736	0.106
ENSG00000153048	CARHSP1	Fibroblast	4.43723e-19	0.413067	1.62354e-14	0.758	0.652	0.106
ENSG00000198612	COPS8	Fibroblast	1.19106e-44	0.305144	4.35798e-40	0.542	0.436	0.106
ENSG00000146425	DYNLT1	Fibroblast	3.70585e-33	0.482221	1.35593e-28	0.842	0.737	0.105
ENSG00000113328	CCNG1	Fibroblast	1.81219e-10	0.417516	6.63063e-06	0.806	0.702	0.104
ENSG00000163618	CADPS	Fibroblast	7.60858e-82	0.25017	2.7839e-77	0.135	0.032	0.103
ENSG00000230590	FTX	Fibroblast	2.25049e-62	0.354878	8.2343e-58	0.858	0.755	0.103
ENSG00000027697	IFNGR1	Fibroblast	1.38215e-10	0.282047	5.05716e-06	0.303	0.201	0.102
ENSG00000091039	OSBPL8	Fibroblast	9.21494e-65	0.347789	3.37166e-60	0.593	0.492	0.101
ENSG00000103152	MPG	Fibroblast	3.58282e-79	0.278875	1.31092e-74	0.654	0.553	0.101
ENSG00000106400	ZNHIT1	Fibroblast	2.13907e-79	0.48626	7.82666e-75	0.827	0.726	0.101
ENSG00000125354	SEPTIN6	Fibroblast	4.64157e-105	0.264808	1.6983e-100	0.41	0.309	0.101
ENSG00000170035	UBE2E3	Fibroblast	2.92935e-59	0.267848	1.07182e-54	0.639	0.538	0.101
ENSG00000115310	RTN4	Fibroblast	3.1422e-92	0.691096	1.1497e-87	0.928	0.828	0.1
ENSG00000173077	DEC1	Fibroblast	2.2859e-39	0.402753	8.36388e-35	0.125	0.026	0.099
ENSG00000185008	ROBO2	Fibroblast	2.40469e-126	0.26246	8.79853e-122	0.329	0.23	0.099
ENSG00000057019	DCBLD2	Fibroblast	6.24457e-48	0.322482	2.28483e-43	0.428	0.33	0.098
ENSG00000151726	ACSL1	Fibroblast	4.64664e-49	0.270855	1.70016e-44	0.31	0.212	0.098
ENSG00000102024	PLS3	Fibroblast	0.00833638	0.283812	1	0.492	0.395	0.097
ENSG00000104332	SFRP1	Fibroblast	2.63784e-142	0.354571	9.65158e-138	0.26	0.163	0.097
ENSG00000105835	NAMPT	Fibroblast	5.72473e-43	0.372496	2.09462e-38	0.607	0.51	0.097
ENSG00000111832	RWDD1	Fibroblast	1.47879e-56	0.338499	5.41076e-52	0.702	0.605	0.097
ENSG00000126432	PRDX5	Fibroblast	8.94329e-143	0.58835	3.27226e-138	0.926	0.83	0.096
ENSG00000138674	SEC31A	Fibroblast	9.22914e-122	0.343832	3.37685e-117	0.685	0.589	0.096
ENSG00000168701	TMEM208	Fibroblast	9.90345e-115	0.31794	3.62357e-110	0.674	0.578	0.096
ENSG00000157916	RER1	Fibroblast	2.62368e-115	0.317418	9.59977e-111	0.634	0.539	0.095
ENSG00000175416	CLTB	Fibroblast	3.41258e-49	0.265958	1.24863e-44	0.462	0.367	0.095
ENSG00000123572	NRK	Fibroblast	2.49854e-13	0.381295	9.1419e-09	0.147	0.053	0.094
ENSG00000133872	SARAF	Fibroblast	2.4697e-05	0.32906	0.903637	0.716	0.622	0.094
ENSG00000158710	TAGLN2	Fibroblast	8.57246e-27	0.344442	3.13658e-22	0.66	0.567	0.093
ENSG00000115204	MPV17	Fibroblast	2.43866e-71	0.297658	8.92281e-67	0.57	0.477	0.093
ENSG00000167244	IGF2	Fibroblast	3.18656e-37	0.357136	1.16593e-32	0.189	0.096	0.093
ENSG00000185624	P4HB	Fibroblast	2.059e-224	0.927125	7.53367e-220	0.964	0.872	0.092
ENSG00000071054	MAP4K4	Fibroblast	7.52592e-139	0.264311	2.75366e-134	0.556	0.465	0.091
ENSG00000158716	DUSP23	Fibroblast	2.65381e-98	0.392568	9.71002e-94	0.432	0.341	0.091
ENSG00000171862	PTEN	Fibroblast	1.60735e-61	0.30335	5.88113e-57	0.589	0.498	0.091
ENSG00000179218	CALR	Fibroblast	1.73826e-121	0.539361	6.36011e-117	0.909	0.819	0.09
ENSG00000105426	PTPRS	Fibroblast	5.14006e-104	0.385396	1.8807e-99	0.487	0.398	0.089
ENSG00000169756	LIMS1	Fibroblast	4.94853e-63	0.300957	1.81062e-58	0.617	0.529	0.088
ENSG00000117143	UAP1	Fibroblast	2.87175e-46	0.268345	1.05074e-41	0.412	0.325	0.087
ENSG00000135404	CD63	Fibroblast	0	1.33956	0	0.994	0.907	0.087
ENSG00000170348	TMED10	Fibroblast	8.11825e-08	0.297247	0.00297039	0.7	0.613	0.087
ENSG00000176171	BNIP3	Fibroblast	4.59458e-88	0.288495	1.68111e-83	0.953	0.866	0.087
ENSG00000131871	SELENOS	Fibroblast	9.15018e-11	0.325591	3.34796e-06	0.663	0.577	0.086
ENSG00000054267	ARID4B	Fibroblast	1.75981e-19	0.279316	6.43898e-15	0.644	0.558	0.086
ENSG00000254999	BRK1	Fibroblast	1.09907e-105	0.659604	4.02137e-101	0.951	0.865	0.086
ENSG00000185088	RPS27L	Fibroblast	7.19986e-36	0.396184	2.63436e-31	0.922	0.837	0.085
ENSG00000115009	CCL20	Fibroblast	1.90135e-06	0.366782	0.0695685	0.112	0.028	0.084
ENSG00000267458	AC092069.1	Fibroblast	1.93541e-27	0.266121	7.08148e-23	0.177	0.095	0.082
ENSG00000136888	ATP6V1G1	Fibroblast	9.57411e-05	0.424688	1	0.934	0.853	0.081
ENSG00000177830	CHID1	Fibroblast	1.61532e-118	0.278351	5.9103e-114	0.604	0.523	0.081
ENSG00000165389	SPTSSA	Fibroblast	9.72484e-06	0.259467	0.355822	0.542	0.462	0.08
ENSG00000166557	TMED3	Fibroblast	6.75676e-126	0.340697	2.47223e-121	0.73	0.65	0.08
ENSG00000171159	C9orf16	Fibroblast	4.39991e-99	0.325362	1.60988e-94	0.706	0.626	0.08
ENSG00000254202	AC015522.1	Fibroblast	1.86219e-117	0.413181	6.81357e-113	0.204	0.124	0.08
ENSG00000130724	CHMP2A	Fibroblast	2.38567e-40	0.307798	8.72891e-36	0.685	0.606	0.079
ENSG00000143774	GUK1	Fibroblast	2.99261e-232	0.597588	1.09497e-227	0.93	0.851	0.079
ENSG00000107863	ARHGAP21	Fibroblast	4.63427e-97	0.302722	1.69563e-92	0.36	0.281	0.079
ENSG00000121440	PDZRN3	Fibroblast	2.98254e-223	0.294263	1.09128e-218	0.513	0.434	0.079
ENSG00000134049	IER3IP1	Fibroblast	8.44569e-40	0.258095	3.09019e-35	0.693	0.614	0.079
ENSG00000169223	LMAN2	Fibroblast	0.00633327	0.304165	1	0.716	0.637	0.079
ENSG00000070831	CDC42	Fibroblast	1.15997e-05	0.423063	0.424421	0.782	0.704	0.078
ENSG00000088832	FKBP1A	Fibroblast	6.97796e-63	0.42472	2.55317e-58	0.852	0.774	0.078
ENSG00000112419	PHACTR2	Fibroblast	2.0597e-15	0.330337	7.53623e-11	0.352	0.274	0.078
ENSG00000114850	SSR3	Fibroblast	5.47627e-108	0.256522	2.00371e-103	0.865	0.787	0.078
ENSG00000122378	PRXL2A	Fibroblast	6.64613e-117	0.396201	2.43175e-112	0.688	0.61	0.078
ENSG00000123562	MORF4L2	Fibroblast	2.6584e-167	1.17653	9.72683e-163	0.986	0.908	0.078
ENSG00000163466	ARPC2	Fibroblast	5.75289e-99	0.4337	2.10493e-94	0.92	0.843	0.077
ENSG00000089063	TMEM230	Fibroblast	6.15626e-53	0.379639	2.25251e-48	0.764	0.687	0.077
ENSG00000160014	CALM3	Fibroblast	5.17367e-10	0.29967	1.89299e-05	0.762	0.685	0.077
ENSG00000162704	ARPC5	Fibroblast	1.75362e-44	0.294351	6.41631e-40	0.647	0.571	0.076
ENSG00000183291	SELENOF	Fibroblast	0.00385205	0.275853	1	0.661	0.585	0.076
ENSG00000042753	AP2S1	Fibroblast	0	0.504395	0	0.948	0.872	0.076
ENSG00000182670	TTC3	Fibroblast	1.26099e-210	0.296843	4.61383e-206	0.86	0.784	0.076
ENSG00000171314	PGAM1	Fibroblast	2.53175e-40	0.421991	9.26342e-36	0.857	0.782	0.075
ENSG00000125534	PPDPF	Fibroblast	4.2532e-17	0.392762	1.5562e-12	0.914	0.84	0.074
ENSG00000118495	PLAGL1	Fibroblast	3.08331e-65	0.292346	1.12815e-60	0.435	0.362	0.073
ENSG00000219200	RNASEK	Fibroblast	1.42996e-126	0.535516	5.23208e-122	0.955	0.882	0.073
ENSG00000109332	UBE2D3	Fibroblast	9.90869e-14	0.417615	3.62549e-09	0.894	0.822	0.072
ENSG00000132432	SEC61G	Fibroblast	6.56311e-142	1.03179	2.40138e-137	0.988	0.916	0.072
ENSG00000198856	OSTC	Fibroblast	1.30042e-195	0.610535	4.75812e-191	0.951	0.879	0.072
ENSG00000111678	C12orf57	Fibroblast	4.685e-303	0.26328	1.71419e-298	0.921	0.85	0.071
ENSG00000128524	ATP6V1F	Fibroblast	1.26745e-69	0.513647	4.63748e-65	0.922	0.851	0.071
ENSG00000183648	NDUFB1	Fibroblast	3.49018e-12	0.329704	1.27702e-07	0.811	0.74	0.071
ENSG00000141552	ANAPC11	Fibroblast	8.76185e-25	0.331716	3.20587e-20	0.832	0.761	0.071
ENSG00000175600	SUGCT	Fibroblast	2.83776e-267	0.341001	1.03831e-262	0.426	0.355	0.071
ENSG00000177700	POLR2L	Fibroblast	4.08258e-199	0.407748	1.49378e-194	0.899	0.829	0.07
ENSG00000128272	ATF4	Fibroblast	5.90981e-24	0.297159	2.16234e-19	0.846	0.777	0.069
ENSG00000132329	RAMP1	Fibroblast	1.00071e-76	0.448454	3.66149e-72	0.256	0.187	0.069
ENSG00000170310	STX8	Fibroblast	1.46404e-43	0.260038	5.35677e-39	0.591	0.522	0.069
ENSG00000127948	POR	Fibroblast	8.20993e-25	0.319179	3.00393e-20	0.371	0.305	0.066
ENSG00000189171	S100A13	Fibroblast	5.70053e-11	0.251032	2.08577e-06	0.524	0.458	0.066
ENSG00000125970	RALY	Fibroblast	6.21916e-17	0.305482	2.27553e-12	0.74	0.674	0.066
ENSG00000161542	PRPSAP1	Fibroblast	2.76344e-50	0.29732	1.01111e-45	0.369	0.304	0.065
ENSG00000100979	PLTP	Fibroblast	8.50791e-205	0.272672	3.11296e-200	0.517	0.453	0.064
ENSG00000166949	SMAD3	Fibroblast	4.20194e-17	0.255533	1.53745e-12	0.339	0.276	0.063
ENSG00000133026	MYH10	Fibroblast	1.14865e-126	0.3126	4.20278e-122	0.586	0.523	0.063
ENSG00000133142	TCEAL4	Fibroblast	0	0.880949	4.79421e-305	0.927	0.865	0.062
ENSG00000105701	FKBP8	Fibroblast	1.34605e-14	0.264707	4.92506e-10	0.708	0.646	0.062
ENSG00000170906	NDUFA3	Fibroblast	2.45958e-14	0.263182	8.99937e-10	0.668	0.607	0.061
ENSG00000213639	PPP1CB	Fibroblast	2.36009e-11	0.385126	8.63532e-07	0.573	0.512	0.061
ENSG00000085733	CTTN	Fibroblast	5.13658e-46	0.285118	1.87942e-41	0.541	0.481	0.06
ENSG00000102007	PLP2	Fibroblast	3.27096e-10	0.457644	1.19681e-05	0.596	0.536	0.06
ENSG00000117899	MESD	Fibroblast	2.21292e-12	0.262438	8.09686e-08	0.587	0.527	0.06
ENSG00000113712	CSNK1A1	Fibroblast	8.99069e-14	0.261355	3.2896e-09	0.768	0.709	0.059
ENSG00000125868	DSTN	Fibroblast	5.17947e-09	0.621238	0.000189512	0.954	0.895	0.059
ENSG00000228474	OST4	Fibroblast	0	1.06985	0	0.986	0.927	0.059
ENSG00000114354	TFG	Fibroblast	9.04686e-06	0.254528	0.331016	0.622	0.564	0.058
ENSG00000135245	HILPDA	Fibroblast	2.78548e-21	0.257703	1.01918e-16	0.44	0.382	0.058
ENSG00000166794	PPIB	Fibroblast	0	0.599219	0	0.97	0.912	0.058
ENSG00000196465	MYL6B	Fibroblast	1.40913e-130	0.365795	5.15587e-126	0.844	0.786	0.058
ENSG00000053371	AKR7A2	Fibroblast	1.83931e-28	0.260849	6.72987e-24	0.624	0.567	0.057
ENSG00000101439	CST3	Fibroblast	7.90844e-180	1.18053	2.89362e-175	0.873	0.816	0.057
ENSG00000135540	NHSL1	Fibroblast	2.10282e-63	0.31252	7.694e-59	0.408	0.351	0.057
ENSG00000114125	RNF7	Fibroblast	1.69871e-27	0.312754	6.21542e-23	0.827	0.77	0.057
ENSG00000092841	MYL6	Fibroblast	0	1.48996	0	0.994	0.938	0.056
ENSG00000104388	RAB2A	Fibroblast	1.47045e-30	0.307417	5.38024e-26	0.789	0.734	0.055
ENSG00000163479	SSR2	Fibroblast	1.25604e-158	0.712538	4.59573e-154	0.966	0.911	0.055
ENSG00000117691	NENF	Fibroblast	1.41743e-13	0.384813	5.18625e-09	0.881	0.828	0.053
ENSG00000185787	MORF4L1	Fibroblast	0.00609251	0.420702	1	0.931	0.878	0.053
ENSG00000106803	SEC61B	Fibroblast	3.54162e-113	0.526736	1.29584e-108	0.966	0.913	0.053
ENSG00000114784	EIF1B	Fibroblast	1.19288e-06	0.356826	0.0436464	0.701	0.654	0.047
ENSG00000189337	KAZN	Fibroblast	1.78213e-187	0.575063	6.52064e-183	0.443	0.398	0.045
ENSG00000196230	TUBB	Fibroblast	1.39733e-275	0.378751	5.11267e-271	0.985	0.94	0.045
ENSG00000078369	GNB1	Fibroblast	4.91166e-69	0.27198	1.79713e-64	0.724	0.679	0.045
ENSG00000151474	FRMD4A	Fibroblast	4.48141e-205	0.30887	1.6397e-200	0.382	0.339	0.043
ENSG00000049192	ADAMTS6	Fibroblast	6.44976e-54	0.281208	2.3599e-49	0.22	0.178	0.042
ENSG00000188243	COMMD6	Fibroblast	2.31907e-05	0.585476	0.848525	0.981	0.94	0.041
ENSG00000255302	EID1	Fibroblast	1.97173e-233	0.265071	7.21436e-229	0.907	0.866	0.041
ENSG00000112514	CUTA	Fibroblast	6.53709e-148	0.367702	2.39186e-143	0.93	0.89	0.04
ENSG00000166681	BEX3	Fibroblast	0	1.30801	0	0.996	0.956	0.04
ENSG00000125356	NDUFA1	Fibroblast	2.17825e-17	0.262734	7.97001e-13	0.901	0.862	0.039
ENSG00000277443	MARCKS	Fibroblast	7.50503e-95	0.334388	2.74601e-90	0.786	0.748	0.038
ENSG00000118816	CCNI	Fibroblast	6.4254e-59	0.319677	2.35099e-54	0.964	0.928	0.036
ENSG00000143761	ARF1	Fibroblast	3.32421e-60	0.403923	1.21629e-55	0.914	0.879	0.035
ENSG00000127540	UQCR11	Fibroblast	2.97081e-55	0.370553	1.08699e-50	0.967	0.932	0.035
ENSG00000108518	PFN1	Fibroblast	1.15258e-137	0.614727	4.21717e-133	0.988	0.955	0.033
ENSG00000180879	SSR4	Fibroblast	2.18675e-121	0.334649	8.00109e-117	0.949	0.916	0.033
ENSG00000243147	MRPL33	Fibroblast	2.27902e-43	0.356294	8.33869e-39	0.739	0.707	0.032
ENSG00000034510	TMSB10	Fibroblast	0	1.94923	0	0.999	0.968	0.031
ENSG00000067560	RHOA	Fibroblast	1.48594e-55	0.35616	5.43691e-51	0.886	0.855	0.031
ENSG00000167693	NXN	Fibroblast	1.62118e-95	0.360315	5.93175e-91	0.476	0.447	0.029
ENSG00000169738	DCXR	Fibroblast	1.78004e-286	0.33593	6.51297e-282	0.824	0.795	0.029
ENSG00000132475	H3F3B	Fibroblast	1.04935e-184	0.381942	3.83948e-180	0.992	0.964	0.028
ENSG00000183098	GPC6	Fibroblast	5.19138e-83	0.263709	1.89947e-78	0.771	0.743	0.028
ENSG00000122705	CLTA	Fibroblast	1.48331e-92	0.314351	5.42727e-88	0.956	0.929	0.027
ENSG00000164405	UQCRQ	Fibroblast	1.19343e-46	0.359326	4.36662e-42	0.954	0.927	0.027
ENSG00000167004	PDIA3	Fibroblast	7.87228e-06	0.250885	0.288039	0.799	0.773	0.026
ENSG00000156411	ATP5MPL	Fibroblast	9.68192e-79	0.595973	3.54252e-74	0.99	0.967	0.023
ENSG00000099622	CIRBP	Fibroblast	2.31044e-131	0.357165	8.45366e-127	0.958	0.935	0.023
ENSG00000173915	ATP5MD	Fibroblast	1.3942e-20	0.271198	5.10123e-16	0.945	0.923	0.022
ENSG00000172757	CFL1	Fibroblast	2.84505e-103	0.394706	1.04097e-98	0.983	0.965	0.018
ENSG00000164919	COX6C	Fibroblast	1.07887e-19	0.305473	3.94749e-15	0.957	0.94	0.017
ENSG00000170315	UBB	Fibroblast	0.000172412	0.251029	1	0.983	0.966	0.017
ENSG00000111669	TPI1	Fibroblast	2.88692e-10	0.711807	1.0563e-05	0.995	0.979	0.016
ENSG00000140264	SERF2	Fibroblast	6.62764e-256	0.92078	2.42499e-251	0.999	0.983	0.016
ENSG00000140319	SRP14	Fibroblast	5.80481e-07	0.291545	0.0212392	0.993	0.977	0.016
ENSG00000156467	UQCRB	Fibroblast	0.000131442	0.253682	1	0.98	0.965	0.015
ENSG00000134333	LDHA	Fibroblast	1.2351e-05	0.404314	0.451912	0.993	0.98	0.013
ENSG00000167996	FTH1	Fibroblast	0	1.9566	0	1	0.987	0.013
ENSG00000075624	ACTB	Fibroblast	1.51571e-196	1.12643	5.54584e-192	1	0.989	0.011
ENSG00000123349	PFDN5	Fibroblast	3.5597e-90	0.43575	1.30246e-85	0.991	0.981	0.01
ENSG00000008988	RPS20	Fibroblast	8.11635e-101	1.10298	2.96969e-96	0.999	0.99	0.009
ENSG00000173812	EIF1	Fibroblast	6.73968e-66	0.820919	2.46598e-61	0.999	0.99	0.009
ENSG00000109861	CTSC	Fibroblast	4.17662e-108	0.312918	1.52819e-103	0.564	0.557	0.007
ENSG00000071082	RPL31	Fibroblast	1.00241e-80	0.682358	3.66772e-76	1	0.994	0.006
ENSG00000158050	DUSP2	Fibroblast	2.43316e-67	0.375802	8.9027e-63	0.218	0.212	0.006
ENSG00000087086	FTL	Fibroblast	3.38424e-59	0.9403	1.23826e-54	1	0.995	0.005
ENSG00000184009	ACTG1	Fibroblast	3.23885e-143	0.363352	1.18506e-138	1	0.995	0.005
ENSG00000111640	GAPDH	Fibroblast	2.48824e-35	0.817674	9.10423e-31	1	0.996	0.004
ENSG00000133112	TPT1	Fibroblast	0	0.408458	0	1	0.996	0.004
ENSG00000147604	RPL7	Fibroblast	7.3926e-100	0.355067	2.70488e-95	0.999	0.995	0.004
ENSG00000172809	RPL38	Fibroblast	8.19712e-43	0.254837	2.99924e-38	1	0.997	0.003
ENSG00000177954	RPS27	Fibroblast	2.28348e-05	0.481802	0.835503	1	0.997	0.003
ENSG00000203875	SNHG5	Fibroblast	4.7081e-51	0.366781	1.72265e-46	0.993	0.99	0.003
ENSG00000142541	RPL13A	Fibroblast	7.69822e-05	0.856338	1	1	0.998	0.002
ENSG00000182774	RPS17	Fibroblast	1.36955e-20	0.462387	5.01105e-16	0.999	0.997	0.002
ENSG00000156508	EEF1A1	Fibroblast	9.01032e-116	0.472918	3.29679e-111	1	0.999	0.001
ENSG00000251562	MALAT1	Fibroblast	2.07907e-16	1.13643	7.6071e-12	0.999	0.998	0.001
ENSG00000069011	PITX1	Fibroblast	3.31243e-178	0.328652	1.21199e-173	0.259	0.262	-0.003
[truncated: 1,910 more rows]

## Sheet: Supplementary File 1b
Supplementary File 1b. Differentially expressed transcripts from neuroendocrine component sub-clustering and groupings
***relates to Figure 4D
gene	p_val	avg_log2FC	pct.1	pct.2	p_val_adj	pct_diff	gene_name	cluster
ENSG00000170312	6.76285e-43	0.666833	0.589	0.286	2.47446e-38	0.303	CDK1	Cycling
ENSG00000131747	1.25189e-41	0.871092	0.7	0.399	4.58055e-37	0.301	TOP2A	Cycling
ENSG00000178999	1.47239e-29	0.558854	0.57	0.305	5.38732e-25	0.265	AURKB	Cycling
ENSG00000111665	2.05258e-30	0.407136	0.407	0.143	7.51018e-26	0.264	CDCA3	Cycling
ENSG00000166851	2.94854e-33	0.614458	0.517	0.253	1.07884e-28	0.264	PLK1	Cycling
ENSG00000137804	2.19962e-32	0.549714	0.684	0.421	8.0482e-28	0.263	NUSAP1	Cycling
ENSG00000157456	2.10282e-31	0.603524	0.654	0.395	7.694e-27	0.259	CCNB2	Cycling
ENSG00000203760	2.03542e-29	0.454343	0.753	0.497	7.44739e-25	0.256	CENPW	Cycling
ENSG00000117399	7.92528e-38	0.798773	0.555	0.305	2.89978e-33	0.25	CDC20	Cycling
ENSG00000173207	3.00203e-59	0.739109	0.901	0.659	1.09841e-54	0.242	CKS1B	Cycling
ENSG00000114315	9.12438e-06	0.8888	0.597	0.36	0.333852	0.237	HES1	Cycling
ENSG00000175063	5.32737e-65	1.4682	0.635	0.398	1.94923e-60	0.237	UBE2C	Cycling
ENSG00000087586	8.18413e-27	0.430499	0.437	0.202	2.99449e-22	0.235	AURKA	Cycling
ENSG00000079616	8.97233e-20	0.378464	0.707	0.476	3.28289e-15	0.231	KIF22	Cycling
ENSG00000100526	6.01257e-23	0.427107	0.483	0.259	2.19994e-18	0.224	CDKN3	Cycling
ENSG00000164104	1.98261e-66	1.26188	0.856	0.635	7.25417e-62	0.221	HMGB2	Cycling
ENSG00000167614	2.10597e-15	0.448305	0.437	0.217	7.70553e-11	0.22	TTYH1	Cycling
ENSG00000143228	9.58375e-21	0.359239	0.464	0.247	3.5066e-16	0.217	NUF2	Cycling
ENSG00000198901	2.61318e-20	0.44709	0.616	0.399	9.56137e-16	0.217	PRC1	Cycling
ENSG00000113810	7.39709e-22	0.310822	0.722	0.506	2.70652e-17	0.216	SMC4	Cycling
ENSG00000134690	1.67891e-21	0.404073	0.452	0.236	6.14295e-17	0.216	CDCA8	Cycling
ENSG00000134057	2.71199e-43	0.797595	0.669	0.454	9.9229e-39	0.215	CCNB1	Cycling
ENSG00000114346	1.60274e-19	0.322719	0.445	0.232	5.86426e-15	0.213	ECT2	Cycling
ENSG00000066279	3.37193e-18	0.333334	0.49	0.279	1.23376e-13	0.211	ASPM	Cycling
ENSG00000215845	2.86285e-05	0.306517	0.662	0.453	1	0.209	TSTD1	Cycling
ENSG00000134222	1.087e-19	0.327926	0.323	0.117	3.97723e-15	0.206	PSRC1	Cycling
ENSG00000075218	1.65451e-17	0.280195	0.43	0.225	6.0537e-13	0.205	GTSE1	Cycling
ENSG00000117724	5.82343e-28	0.56691	0.726	0.521	2.13074e-23	0.205	CENPF	Cycling
ENSG00000106541	1.99481e-48	1.37966	0.228	0.031	7.29879e-44	0.197	AGR2	Cycling
ENSG00000115163	5.46538e-19	0.309421	0.338	0.141	1.99973e-14	0.197	CENPA	Cycling
ENSG00000089356	4.57401e-26	1.1587	0.232	0.041	1.67359e-21	0.191	FXYD3	Cycling
ENSG00000089685	1.18709e-23	0.552604	0.662	0.471	4.34346e-19	0.191	BIRC5	Cycling
ENSG00000138778	1.16814e-19	0.382344	0.422	0.231	4.2741e-15	0.191	CENPE	Cycling
ENSG00000072571	2.37953e-21	0.387254	0.392	0.206	8.70647e-17	0.186	HMMR	Cycling
ENSG00000188229	2.61361e-39	0.875722	0.909	0.723	9.56294e-35	0.186	TUBB4B	Cycling
ENSG00000088325	1.13925e-22	0.428451	0.646	0.463	4.16842e-18	0.183	TPX2	Cycling
ENSG00000127324	1.37975e-42	0.815791	0.209	0.026	5.04838e-38	0.183	TSPAN8	Cycling
ENSG00000126787	2.39426e-19	0.317684	0.407	0.225	8.76036e-15	0.182	DLGAP5	Cycling
ENSG00000142945	5.36559e-17	0.284513	0.35	0.169	1.96321e-12	0.181	KIF2C	Cycling
ENSG00000154473	2.7997e-21	0.306558	0.829	0.649	1.02438e-16	0.18	BUB3	Cycling
ENSG00000139219	7.17171e-13	0.359257	0.452	0.277	2.62406e-08	0.175	COL2A1	Cycling
ENSG00000164611	1.88756e-49	0.957151	0.768	0.593	6.90638e-45	0.175	PTTG1	Cycling
ENSG00000118193	7.39917e-19	0.3666	0.297	0.123	2.70728e-14	0.174	KIF14	Cycling
ENSG00000118523	1.5722e-14	0.995824	0.251	0.078	5.75253e-10	0.173	CCN2	Cycling
ENSG00000078401	3.69053e-31	1.08181	0.217	0.045	1.35033e-26	0.172	EDN1	Cycling
ENSG00000164109	1.04729e-24	0.301605	0.779	0.608	3.83192e-20	0.171	MAD2L1	Cycling
ENSG00000134240	1.22928e-28	0.428573	0.183	0.015	4.4978e-24	0.168	HMGCS2	Cycling
ENSG00000148773	3.05204e-13	0.280564	0.471	0.303	1.11671e-08	0.168	MKI67	Cycling
ENSG00000158402	1.31015e-13	0.308919	0.274	0.106	4.79371e-09	0.168	CDC25C	Cycling
ENSG00000244187	2.74443e-25	0.776434	0.559	0.391	1.00416e-20	0.168	TMEM141	Cycling
ENSG00000189334	4.66741e-22	0.493372	0.19	0.024	1.70776e-17	0.166	S100A14	Cycling
ENSG00000035499	7.43565e-12	0.257115	0.369	0.204	2.72063e-07	0.165	DEPDC1B	Cycling
ENSG00000170345	9.34622e-23	1.39543	0.327	0.165	3.41969e-18	0.162	FOS	Cycling
ENSG00000145386	1.56291e-15	0.34877	0.388	0.227	5.71854e-11	0.161	CCNA2	Cycling
ENSG00000117650	7.38828e-15	0.294807	0.247	0.089	2.7033e-10	0.158	NEK2	Cycling
ENSG00000130402	5.529e-07	0.285904	0.7	0.543	0.0202301	0.157	ACTN4	Cycling
ENSG00000164266	1.52249e-18	0.867039	0.179	0.023	5.57066e-14	0.156	SPINK1	Cycling
ENSG00000136108	1.55136e-12	0.274513	0.555	0.401	5.67627e-08	0.154	CKAP2	Cycling
ENSG00000104823	3.06648e-07	0.333724	0.722	0.57	0.01122	0.152	ECH1	Cycling
ENSG00000123975	4.97036e-35	0.710796	0.833	0.681	1.81861e-30	0.152	CKS2	Cycling
ENSG00000163586	3.4074e-39	1.81589	0.16	0.014	1.24673e-34	0.146	FABP1	Cycling
ENSG00000168393	2.96412e-15	0.285919	0.776	0.634	1.08454e-10	0.142	DTYMK	Cycling
ENSG00000165092	9.89295e-21	0.407923	0.167	0.026	3.61973e-16	0.141	ALDH1A1	Cycling
ENSG00000150687	3.23791e-07	0.526046	0.24	0.1	0.0118472	0.14	PRSS23	Cycling
ENSG00000163435	0.000415093	0.422268	0.228	0.088	1	0.14	ELF3	Cycling
ENSG00000184661	4.1722e-13	0.282434	0.308	0.168	1.52657e-08	0.14	CDCA2	Cycling
ENSG00000127831	3.7843e-14	0.284705	0.163	0.025	1.38464e-09	0.138	VIL1	Cycling
ENSG00000167644	1.14336e-13	0.363782	0.163	0.027	4.18345e-09	0.136	C19orf33	Cycling
ENSG00000102554	1.59165e-20	0.764902	0.221	0.086	5.82369e-16	0.135	KLF5	Cycling
ENSG00000170540	3.00082e-58	1.20566	0.696	0.562	1.09797e-53	0.134	ARL6IP1	Cycling
ENSG00000188486	2.25628e-08	0.3068	0.578	0.445	0.000825549	0.133	H2AFX	Cycling
ENSG00000183742	0.00460873	0.546232	0.217	0.085	1	0.132	MACC1	Cycling
ENSG00000131981	1.26377e-29	0.780565	0.27	0.139	4.62399e-25	0.131	LGALS3	Cycling
ENSG00000157399	4.74601e-17	0.368868	0.163	0.034	1.73652e-12	0.129	ARSE	Cycling
ENSG00000173334	5.78613e-05	0.30018	0.217	0.09	1	0.127	TRIB1	Cycling
ENSG00000125740	1.19342e-07	0.422833	0.175	0.05	0.00436662	0.125	FOSB	Cycling
ENSG00000198075	1.70002e-09	0.410105	0.213	0.089	6.22019e-05	0.124	SULT1C4	Cycling
ENSG00000227121	4.34982e-37	0.362405	0.125	0.002	1.59156e-32	0.123	LINC02672	Cycling
ENSG00000157483	1.20696e-05	0.662996	0.414	0.293	0.441614	0.121	MYO1E	Cycling
ENSG00000189143	0.00474929	0.732942	0.236	0.117	1	0.119	CLDN4	Cycling
ENSG00000261008	6.68225e-07	0.306848	0.544	0.425	0.0244497	0.119	LINC01572	Cycling
ENSG00000139354	1.53493e-09	0.292983	0.24	0.122	5.61616e-05	0.118	GAS2L3	Cycling
ENSG00000132170	6.07437e-15	0.286497	0.137	0.02	2.22255e-10	0.117	PPARG	Cycling
ENSG00000150540	5.8647e-16	0.311669	0.156	0.04	2.14583e-11	0.116	HNMT	Cycling
ENSG00000154639	0.00245996	0.359528	0.441	0.327	1	0.114	CXADR	Cycling
ENSG00000101076	2.26935e-22	0.268523	0.118	0.005	8.30332e-18	0.113	HNF4A	Cycling
ENSG00000106355	1.13454e-08	0.256913	0.749	0.637	0.000415115	0.112	LSM5	Cycling
ENSG00000171223	0.00764096	0.541834	0.449	0.337	1	0.112	JUNB	Cycling
ENSG00000182481	2.03982e-31	0.56457	0.627	0.516	7.46349e-27	0.111	KPNA2	Cycling
ENSG00000089327	6.84604e-13	0.256215	0.186	0.076	2.5049e-08	0.11	FXYD5	Cycling
ENSG00000105968	2.33725e-05	0.290953	0.795	0.686	0.855175	0.109	H2AFV	Cycling
ENSG00000109046	0.00984606	0.354015	0.646	0.537	1	0.109	WSB1	Cycling
ENSG00000120738	6.98302e-10	0.788832	0.209	0.1	2.55502e-05	0.109	EGR1	Cycling
ENSG00000205544	0.000803198	0.457164	0.65	0.541	1	0.109	TMEM256	Cycling
ENSG00000128016	0.000235291	0.274408	0.156	0.049	1	0.107	ZFP36	Cycling
ENSG00000184384	0.000212309	0.291361	0.247	0.143	1	0.104	MAML2	Cycling
ENSG00000085871	0.00139591	0.286849	0.403	0.301	1	0.102	MGST2	Cycling
ENSG00000167553	1.00409e-20	0.329148	0.856	0.755	3.67386e-16	0.101	TUBA1C	Cycling
ENSG00000112773	0.00974444	0.271769	0.236	0.139	1	0.097	TENT5A	Cycling
ENSG00000233041	2.05272e-09	0.324203	0.11	0.014	7.51071e-05	0.096	PHGR1	Cycling
ENSG00000104327	1.59673e-06	0.286622	0.156	0.062	0.0584229	0.094	CALB1	Cycling
ENSG00000171345	5.04676e-05	0.836861	0.278	0.187	1	0.091	KRT19	Cycling
ENSG00000144645	1.45098e-05	0.300999	0.319	0.229	0.5309	0.09	OSBPL10	Cycling
ENSG00000148926	0.000355121	0.318155	0.144	0.056	1	0.088	ADM	Cycling
ENSG00000095739	8.38777e-11	0.254495	0.16	0.073	3.069e-06	0.087	BAMBI	Cycling
ENSG00000160888	0.000231111	0.628445	0.506	0.419	1	0.087	IER2	Cycling
ENSG00000123358	0.00429784	0.250814	0.183	0.097	1	0.086	NR4A1	Cycling
ENSG00000087074	3.72907e-06	0.485273	0.289	0.208	0.136443	0.081	PPP1R15A	Cycling
ENSG00000165078	1.66721e-05	0.299588	0.175	0.094	0.610017	0.081	CPA6	Cycling
ENSG00000136826	5.21049e-05	0.260651	0.125	0.048	1	0.077	KLF4	Cycling
ENSG00000122870	0.00923053	0.389109	0.407	0.331	1	0.076	BICC1	Cycling
ENSG00000244509	3.18494e-10	0.26836	0.125	0.05	1.16534e-05	0.075	APOBEC3C	Cycling
ENSG00000197747	1.71622e-06	0.988128	0.27	0.197	0.0627948	0.073	S100A10	Cycling
ENSG00000111907	5.60083e-06	0.269273	0.464	0.392	0.204929	0.072	TPD52L1	Cycling
ENSG00000280878	0.00331953	0.28355	0.129	0.058	1	0.071	AC017002.5	Cycling
ENSG00000160932	0.000215609	0.378338	0.886	0.817	1	0.069	LY6E	Cycling
ENSG00000132002	8.89946e-06	0.56154	0.323	0.255	0.325623	0.068	DNAJB1	Cycling
ENSG00000176171	0.00107871	0.439697	0.897	0.831	1	0.066	BNIP3	Cycling
ENSG00000117632	1.30207e-08	0.280703	0.981	0.916	0.000476414	0.065	STMN1	Cycling
ENSG00000205581	3.48491e-05	0.303312	0.954	0.897	1	0.057	HMGN1	Cycling
ENSG00000117318	0.00326607	0.415358	0.289	0.238	1	0.051	ID3	Cycling
ENSG00000123416	3.60714e-36	0.521882	0.996	0.958	1.31982e-31	0.038	TUBA1B	Cycling
ENSG00000198830	1.97278e-10	0.359214	0.958	0.923	7.21821e-06	0.035	HMGN2	Cycling
ENSG00000166165	1.60581e-52	1.25875	0.973	0.941	5.87552e-48	0.032	CKB	Cycling
ENSG00000143933	7.72708e-10	0.530317	0.962	0.933	2.82726e-05	0.029	CALM2	Cycling
ENSG00000111669	0.00126497	0.254958	0.996	0.972	1	0.024	TPI1	Cycling
ENSG00000177606	2.72369e-05	0.834666	0.369	0.348	0.996572	0.021	JUN	Cycling
ENSG00000189403	1.00301e-20	0.270505	0.996	0.975	3.6699e-16	0.021	HMGB1	Cycling
ENSG00000196230	4.3341e-20	0.424519	0.985	0.964	1.5858e-15	0.021	TUBB	Cycling
ENSG00000108106	2.0293e-11	0.29722	0.867	0.848	7.42501e-07	0.019	UBE2S	Cycling
ENSG00000134333	0.000567314	0.260538	0.992	0.975	1	0.017	LDHA	Cycling
ENSG00000203875	0.000273033	0.263821	1	0.987	1	0.013	SNHG5	Cycling
ENSG00000071082	0.00918812	0.52952	1	0.991	1	0.009	RPL31	Cycling
ENSG00000135486	7.65278e-06	0.305527	0.992	0.984	0.280008	0.008	HNRNPA1	Cycling
ENSG00000147604	1.24856e-10	0.396741	1	0.993	4.56834e-06	0.007	RPL7	Cycling
ENSG00000182774	0.00231629	0.264731	1	0.995	1	0.005	RPS17	Cycling
ENSG00000198918	4.99854e-10	0.350897	1	0.997	1.82892e-05	0.003	RPL39	Cycling
ENSG00000109475	4.43688e-06	0.266649	1	0.998	0.162341	0.002	RPL34	Cycling
ENSG00000229117	2.28588e-10	0.33512	1	0.999	8.36382e-06	0.001	RPL41	Cycling
ENSG00000183971	1.15085e-08	0.250888	0.757	0.879	0.000421083	-0.122	NPW	Cycling
ENSG00000101255	4.52277e-92	0.456268	0.34	0.21	1.65484e-87	0.13	TRIB3	MYC Epithelial
ENSG00000169136	1.44407e-85	0.628325	0.442	0.327	5.28369e-81	0.115	ATF5	MYC Epithelial
EGFP	5.02827e-18	0.379082	0.957	0.852	1.83979e-13	0.105	EGFP	MYC Epithelial
ENSG00000197989	1.12849e-64	0.48249	0.506	0.407	4.12902e-60	0.099	SNHG12	MYC Epithelial
ENSG00000255717	1.43471e-112	0.547712	0.765	0.666	5.24946e-108	0.099	SNHG1	MYC Epithelial
ENSG00000282885	6.20388e-43	0.261704	0.269	0.171	2.26994e-38	0.098	AL627171.2	MYC Epithelial
ENSG00000224032	5.02763e-178	0.584992	0.916	0.82	1.83956e-173	0.096	EPB41L4A-AS1	MYC Epithelial
ENSG00000155438	1.21317e-21	0.251999	0.858	0.777	4.43888e-17	0.081	NIFK	MYC Epithelial
ENSG00000136732	1.85741e-27	0.258913	0.836	0.763	6.79608e-23	0.073	GYPC	MYC Epithelial
ENSG00000136997	1.89808e-08	0.463917	0.866	0.794	0.00069449	0.072	MYC	MYC Epithelial
ENSG00000100814	1.19437e-69	0.372618	0.911	0.843	4.37008e-65	0.068	CCNB1IP1	MYC Epithelial
ENSG00000168209	1.75323e-33	0.278137	0.741	0.673	6.41489e-29	0.068	DDIT4	MYC Epithelial
ENSG00000130811	4.42979e-40	0.262563	0.949	0.884	1.62081e-35	0.065	EIF3G	MYC Epithelial
ENSG00000269893	2.98207e-168	0.46789	0.963	0.899	1.09111e-163	0.064	SNHG8	MYC Epithelial
ENSG00000137309	1.38952e-19	0.262592	0.952	0.898	5.08411e-15	0.054	HMGA1	MYC Epithelial
ENSG00000287001	1.55898e-09	0.370934	0.253	0.2	5.70417e-05	0.053	AC010624.5	MYC Epithelial
ENSG00000171490	6.8737e-31	0.256616	0.971	0.918	2.51502e-26	0.053	RSL1D1	MYC Epithelial
ENSG00000143256	1.85797e-40	0.358067	0.925	0.874	6.79811e-36	0.051	PFDN2	MYC Epithelial
ENSG00000115128	1.78069e-58	0.326316	0.938	0.887	6.51538e-54	0.051	SF3B6	MYC Epithelial
ENSG00000031698	2.18575e-53	0.252248	0.708	0.658	7.99743e-49	0.05	SARS	MYC Epithelial
ENSG00000163584	2.65063e-15	0.299618	0.956	0.907	9.69838e-11	0.049	RPL22L1	MYC Epithelial
ENSG00000100353	9.55174e-66	0.289898	0.915	0.871	3.49489e-61	0.044	EIF3D	MYC Epithelial
ENSG00000204389	5.38047e-28	0.41133	0.153	0.118	1.96866e-23	0.035	HSPA1A	MYC Epithelial
ENSG00000149100	3.53899e-42	0.277836	0.954	0.919	1.29488e-37	0.035	EIF3M	MYC Epithelial
ENSG00000114850	1.17084e-53	0.346169	0.851	0.817	4.284e-49	0.034	SSR3	MYC Epithelial
ENSG00000278996	0.000180869	0.293889	0.415	0.381	1	0.034	FP671120.4	MYC Epithelial
ENSG00000186184	1.96628e-61	0.258789	0.955	0.921	7.19441e-57	0.034	POLR1D	MYC Epithelial
ENSG00000287763	9.11712e-46	0.438072	0.435	0.402	3.33586e-41	0.033	AC068279.2	MYC Epithelial
ENSG00000168003	1.5309e-98	0.505395	0.76	0.729	5.6014e-94	0.031	SLC3A2	MYC Epithelial
ENSG00000105373	3.70843e-72	0.278426	0.964	0.933	1.35688e-67	0.031	NOP53	MYC Epithelial
ENSG00000233016	2.15385e-181	0.619555	0.988	0.958	7.88072e-177	0.03	SNHG7	MYC Epithelial
ENSG00000116717	1.3285e-39	0.297437	0.466	0.437	4.86083e-35	0.029	GADD45A	MYC Epithelial
ENSG00000166012	1.06596e-49	0.35832	0.943	0.919	3.90023e-45	0.024	TAF1D	MYC Epithelial
ENSG00000124614	1.87533e-133	0.298649	0.994	0.971	6.86165e-129	0.023	RPS10	MYC Epithelial
ENSG00000145741	5.18259e-126	0.292831	1	0.977	1.89626e-121	0.023	BTF3	MYC Epithelial
ENSG00000109971	8.66351e-40	0.382587	0.974	0.952	3.16989e-35	0.022	HSPA8	MYC Epithelial
ENSG00000245910	7.04015e-98	0.332511	0.994	0.974	2.57592e-93	0.02	SNHG6	MYC Epithelial
ENSG00000173812	1.87694e-239	0.346321	0.999	0.981	6.86755e-235	0.018	EIF1	MYC Epithelial
ENSG00000114942	2.02141e-155	0.453736	0.998	0.985	7.39615e-151	0.013	EEF1B2	MYC Epithelial
ENSG00000169100	5.14509e-99	0.300032	0.996	0.983	1.88254e-94	0.013	SLC25A6	MYC Epithelial
ENSG00000131469	6.75428e-184	0.299501	1	0.99	2.47132e-179	0.01	RPL27	MYC Epithelial
ENSG00000104529	3.27438e-88	0.356568	0.988	0.979	1.19806e-83	0.009	EEF1D	MYC Epithelial
ENSG00000156482	1.79017e-219	0.396594	1	0.991	6.55007e-215	0.009	RPL30	MYC Epithelial
ENSG00000168028	3.70855e-117	0.294934	1	0.991	1.35692e-112	0.009	RPSA	MYC Epithelial
ENSG00000175061	1.63786e-254	0.408734	1	0.991	5.99276e-250	0.009	SNHG29	MYC Epithelial
ENSG00000110700	1.33758e-208	0.356561	1	0.992	4.89409e-204	0.008	RPS13	MYC Epithelial
ENSG00000133112	5.99778e-172	0.384694	1	0.992	2.19453e-167	0.008	TPT1	MYC Epithelial
ENSG00000177410	0	0.714804	0.999	0.991	0	0.008	ZFAS1	MYC Epithelial
ENSG00000196531	2.54172e-159	0.364183	1	0.992	9.29989e-155	0.008	NACA	MYC Epithelial
ENSG00000234741	1.06639e-304	0.624649	0.996	0.988	3.90181e-300	0.008	GAS5	MYC Epithelial
ENSG00000114391	8.97295e-142	0.273567	1	0.993	3.28311e-137	0.007	RPL24	MYC Epithelial
ENSG00000198755	4.08599e-214	0.33111	1	0.993	1.49502e-209	0.007	RPL10A	MYC Epithelial
ENSG00000105640	6.09105e-238	0.366622	1	0.994	2.22865e-233	0.006	RPL18A	MYC Epithelial
ENSG00000116251	4.20275e-117	0.258723	1	0.994	1.53774e-112	0.006	RPL22	MYC Epithelial
ENSG00000163682	9.01377e-203	0.320006	1	0.994	3.29805e-198	0.006	RPL9	MYC Epithelial
ENSG00000182899	1.33494e-236	0.3173	1	0.994	4.88442e-232	0.006	RPL35A	MYC Epithelial
ENSG00000083845	5.07253e-151	0.349094	0.999	0.994	1.85599e-146	0.005	RPS5	MYC Epithelial
ENSG00000105193	2.91135e-207	0.323086	1	0.995	1.06523e-202	0.005	RPS16	MYC Epithelial
ENSG00000108107	5.8253e-157	0.288027	1	0.995	2.13142e-152	0.005	RPL28	MYC Epithelial
ENSG00000108298	1.52512e-217	0.371396	1	0.995	5.58025e-213	0.005	RPL19	MYC Epithelial
ENSG00000122026	3.52814e-161	0.250038	1	0.995	1.29091e-156	0.005	RPL21	MYC Epithelial
ENSG00000134419	1.96599e-201	0.307358	1	0.995	7.19338e-197	0.005	RPS15A	MYC Epithelial
ENSG00000171863	2.59979e-169	0.348022	1	0.995	9.51235e-165	0.005	RPS7	MYC Epithelial
ENSG00000174748	7.45664e-208	0.285574	1	0.995	2.72831e-203	0.005	RPL15	MYC Epithelial
ENSG00000254772	1.06637e-161	0.287798	0.999	0.994	3.90173e-157	0.005	EEF1G	MYC Epithelial
ENSG00000136942	4.90414e-187	0.263977	1	0.996	1.79438e-182	0.004	RPL35	MYC Epithelial
ENSG00000143947	1.78485e-171	0.319351	1	0.996	6.53058e-167	0.004	RPS27A	MYC Epithelial
ENSG00000147403	2.76927e-193	0.284646	1	0.996	1.01325e-188	0.004	RPL10	MYC Epithelial
ENSG00000148303	1.3425e-110	0.321087	0.999	0.995	4.91207e-106	0.004	RPL7A	MYC Epithelial
ENSG00000161016	1.82472e-202	0.32647	1	0.996	6.67648e-198	0.004	RPL8	MYC Epithelial
ENSG00000171858	3.10084e-152	0.269748	1	0.996	1.13457e-147	0.004	RPS21	MYC Epithelial
ENSG00000188846	3.57683e-149	0.336029	1	0.996	1.30873e-144	0.004	RPL14	MYC Epithelial
ENSG00000063177	5.14137e-226	0.368225	1	0.997	1.88117e-221	0.003	RPL18	MYC Epithelial
ENSG00000089009	6.48183e-149	0.31179	1	0.997	2.37164e-144	0.003	RPL6	MYC Epithelial
ENSG00000130255	2.08085e-254	0.338881	1	0.997	7.61362e-250	0.003	RPL36	MYC Epithelial
ENSG00000137154	6.81481e-155	0.309558	1	0.997	2.49347e-150	0.003	RPS6	MYC Epithelial
ENSG00000145425	2.10619e-194	0.393626	1	0.997	7.70634e-190	0.003	RPS3A	MYC Epithelial
ENSG00000149273	5.14505e-181	0.358368	1	0.997	1.88252e-176	0.003	RPS3	MYC Epithelial
ENSG00000162244	6.93528e-206	0.384912	1	0.997	2.53755e-201	0.003	RPL29	MYC Epithelial
ENSG00000170889	4.74565e-130	0.277159	1	0.997	1.73638e-125	0.003	RPS9	MYC Epithelial
ENSG00000186468	5.08944e-213	0.351777	1	0.997	1.86218e-208	0.003	RPS23	MYC Epithelial
ENSG00000197958	7.03727e-248	0.394637	1	0.997	2.57487e-243	0.003	RPL12	MYC Epithelial
ENSG00000204628	1.96993e-133	0.351345	0.999	0.996	7.2078e-129	0.003	RACK1	MYC Epithelial
ENSG00000233927	1.17558e-199	0.269811	1	0.997	4.30132e-195	0.003	RPS28	MYC Epithelial
ENSG00000105372	9.12678e-296	0.409394	1	0.998	3.3394e-291	0.002	RPS19	MYC Epithelial
ENSG00000112306	3.43773e-245	0.397908	1	0.998	1.25783e-240	0.002	RPS12	MYC Epithelial
ENSG00000122406	1.03863e-216	0.418676	1	0.998	3.80024e-212	0.002	RPL5	MYC Epithelial
ENSG00000142676	5.06445e-175	0.351263	1	0.998	1.85303e-170	0.002	RPL11	MYC Epithelial
ENSG00000144713	2.76808e-228	0.346875	1	0.998	1.01281e-223	0.002	RPL32	MYC Epithelial
ENSG00000145592	6.74154e-196	0.292204	1	0.998	2.46666e-191	0.002	RPL37	MYC Epithelial
ENSG00000161970	1.6285e-239	0.418116	1	0.998	5.95851e-235	0.002	RPL26	MYC Epithelial
ENSG00000164587	1.50144e-200	0.314291	1	0.998	5.49362e-196	0.002	RPS14	MYC Epithelial
ENSG00000181163	3.18579e-28	0.262555	0.998	0.996	1.16565e-23	0.002	NPM1	MYC Epithelial
ENSG00000198034	2.2316e-144	0.274098	1	0.998	8.16521e-140	0.002	RPS4X	MYC Epithelial
ENSG00000265681	8.97704e-187	0.350861	1	0.998	3.28461e-182	0.002	RPL17	MYC Epithelial
ENSG00000138326	9.74919e-191	0.362165	1	0.999	3.56713e-186	0.001	RPS24	MYC Epithelial
ENSG00000140988	2.40813e-166	0.281948	1	0.999	8.81112e-162	0.001	RPS2	MYC Epithelial
ENSG00000156508	1.13246e-99	0.262373	1	0.999	4.14355e-95	0.001	EEF1A1	MYC Epithelial
ENSG00000167526	1.70229e-228	0.383314	1	0.999	6.2285e-224	0.001	RPL13	MYC Epithelial
ENSG00000231500	1.94814e-261	0.41944	1	0.999	7.12806e-257	0.001	RPS18	MYC Epithelial
ENSG00000100316	7.69358e-81	0.28572	0.999	0.999	2.815e-76	0	RPL3	MYC Epithelial
ENSG00000139352	1.34688e-104	1.32797	0.458	0.124	4.9281e-100	0.334	ASCL1	NE
ENSG00000225783	5.31559e-71	0.642841	0.474	0.188	1.94492e-66	0.286	MIAT	NE
ENSG00000184357	6.30773e-186	0.88602	0.555	0.29	2.30793e-181	0.265	HIST1H1B	NE
ENSG00000286522	2.57168e-152	0.607997	0.493	0.231	9.40953e-148	0.262	HIST1H3B	NE
ENSG00000160180	5.28055e-115	3.14273	0.318	0.057	1.9321e-110	0.261	TFF3	NE
ENSG00000197409	3.12049e-135	0.527686	0.465	0.21	1.14176e-130	0.255	HIST1H3D	NE
ENSG00000101443	6.74928e-20	1.30671	0.357	0.103	2.46949e-15	0.254	WFDC2	NE
ENSG00000119888	1.39543e-25	0.994663	0.491	0.241	5.10573e-21	0.25	EPCAM	NE
ENSG00000189143	2.27897e-10	0.99358	0.339	0.096	8.33851e-06	0.243	CLDN4	NE
ENSG00000183036	2.04982e-56	1.92851	0.318	0.079	7.50009e-52	0.239	PCP4	NE
ENSG00000163435	1.51435e-20	0.78354	0.301	0.069	5.54085e-16	0.232	ELF3	NE
ENSG00000141401	3.77769e-47	0.603566	0.729	0.499	1.38222e-42	0.23	IMPA2	NE
ENSG00000184260	7.39175e-106	0.404664	0.439	0.21	2.70457e-101	0.229	HIST2H2AC	NE
ENSG00000203852	6.29194e-126	0.525225	0.384	0.157	2.30216e-121	0.227	HIST2H3A	NE
ENSG00000187837	1.08923e-132	0.696985	0.583	0.358	3.98538e-128	0.225	HIST1H1C	NE
ENSG00000258947	1.61489e-53	0.514791	0.821	0.596	5.90872e-49	0.225	TUBB3	NE
ENSG00000167642	3.63733e-11	0.812176	0.511	0.288	1.33086e-06	0.223	SPINT2	NE
ENSG00000185633	3.013e-22	1.48653	0.328	0.105	1.10243e-17	0.223	NDUFA4L2	NE
ENSG00000273983	1.43981e-108	0.332835	0.344	0.121	5.26813e-104	0.223	HIST1H3G	NE
ENSG00000168298	1.76446e-149	0.597355	0.534	0.312	6.45597e-145	0.222	HIST1H1E	NE
ENSG00000172183	7.26138e-40	0.650531	0.281	0.06	2.65687e-35	0.221	ISG20	NE
ENSG00000181885	6.14471e-07	0.673494	0.318	0.098	0.0224829	0.22	CLDN7	NE
ENSG00000183742	2.32585e-19	0.951695	0.287	0.067	8.51005e-15	0.22	MACC1	NE
ENSG00000132698	2.08048e-13	0.47882	0.289	0.072	7.61226e-09	0.217	RAB25	NE
ENSG00000118640	3.83148e-12	0.439563	0.367	0.151	1.4019e-07	0.216	VAMP8	NE
ENSG00000115461	1.47437e-112	2.69594	0.398	0.183	5.39458e-108	0.215	IGFBP5	NE
ENSG00000039068	2.50813e-06	0.643841	0.295	0.081	0.0917699	0.214	CDH1	NE
ENSG00000124575	3.28412e-160	0.797529	0.549	0.336	1.20163e-155	0.213	HIST1H1D	NE
ENSG00000115738	5.83188e-82	1.56932	0.412	0.2	2.13383e-77	0.212	ID2	NE
ENSG00000267795	8.42505e-26	0.494698	0.257	0.048	3.08264e-21	0.209	SMIM22	NE
ENSG00000196787	3.41675e-95	0.312148	0.367	0.16	1.25016e-90	0.207	HIST1H2AG	NE
ENSG00000133424	4.47291e-26	0.367361	0.672	0.468	1.63659e-21	0.204	LARGE1	NE
ENSG00000183844	1.76552e-40	0.516029	0.237	0.035	6.45985e-36	0.202	FAM3B	NE
ENSG00000231607	8.96733e-25	0.42046	0.601	0.401	3.28106e-20	0.2	DLEU2	NE
ENSG00000162772	1.60997e-11	1.05909	0.392	0.194	5.89073e-07	0.198	ATF3	NE
ENSG00000182054	1.74549e-66	0.848573	0.817	0.622	6.38656e-62	0.195	IDH2	NE
ENSG00000214530	4.77638e-09	0.531554	0.292	0.1	0.000174763	0.192	STARD10	NE
ENSG00000110680	2.94381e-45	1.14265	0.218	0.027	1.07711e-40	0.191	CALCA	NE
ENSG00000227036	0.000401142	0.540558	0.292	0.102	1	0.19	LINC00511	NE
ENSG00000165215	5.70377e-12	0.571255	0.416	0.229	2.08695e-07	0.187	CLDN3	NE
ENSG00000243955	4.20009e-64	0.706397	0.2	0.013	1.53677e-59	0.187	GSTA1	NE
ENSG00000170017	2.16724e-10	0.449426	0.389	0.203	7.9297e-06	0.186	ALCAM	NE
ENSG00000143878	1.39891e-10	0.661336	0.428	0.243	5.11849e-06	0.185	RHOB	NE
ENSG00000140526	2.99444e-08	0.503972	0.308	0.124	0.00109564	0.184	ABHD2	NE
ENSG00000159388	1.22416e-25	0.693582	0.385	0.201	4.47908e-21	0.184	BTG2	NE
ENSG00000170540	2.79904e-18	0.361841	0.731	0.547	1.02414e-13	0.184	ARL6IP1	NE
ENSG00000067082	5.62436e-15	1.14315	0.518	0.339	2.0579e-10	0.179	KLF6	NE
ENSG00000139289	2.3158e-10	0.557405	0.254	0.076	8.47328e-06	0.178	PHLDA1	NE
ENSG00000165061	1.18386e-19	0.511264	0.24	0.062	4.33161e-15	0.178	ZMAT4	NE
ENSG00000198732	8.90683e-45	0.29472	0.361	0.183	3.25892e-40	0.178	SMOC1	NE
ENSG00000156675	0.000223824	0.534124	0.443	0.266	1	0.177	RAB11FIP1	NE
ENSG00000245750	3.89751e-34	0.556327	0.216	0.039	1.42606e-29	0.177	DRAIC	NE
ENSG00000053438	3.33519e-11	0.262629	0.462	0.286	1.22031e-06	0.176	NNAT	NE
ENSG00000100592	1.7872e-21	0.316971	0.601	0.426	6.5392e-17	0.175	DAAM1	NE
ENSG00000171345	3.16566e-09	0.653067	0.348	0.173	0.000115828	0.175	KRT19	NE
ENSG00000175567	5.75374e-26	0.357599	0.527	0.354	2.10524e-21	0.173	UCP2	NE
ENSG00000205544	6.859e-12	0.478896	0.7	0.527	2.50964e-07	0.173	TMEM256	NE
ENSG00000122642	1.28074e-18	0.541881	0.347	0.175	4.6861e-14	0.172	FKBP9	NE
ENSG00000177606	3.35993e-14	1.18728	0.504	0.332	1.22936e-09	0.172	JUN	NE
ENSG00000135480	8.5235e-08	0.484275	0.217	0.046	0.00311866	0.171	KRT7	NE
ENSG00000107159	7.97306e-16	0.527314	0.343	0.173	2.91726e-11	0.17	CA9	NE
ENSG00000151012	7.20141e-21	0.455575	0.327	0.157	2.63492e-16	0.17	SLC7A11	NE
ENSG00000105699	0.000205308	0.329786	0.327	0.158	1	0.169	LSR	NE
ENSG00000155093	6.75661e-26	0.297605	0.333	0.164	2.47218e-21	0.169	PTPRN2	NE
ENSG00000141526	0.00182625	0.422156	0.32	0.152	1	0.168	SLC16A3	NE
ENSG00000079739	1.37867e-16	0.270075	0.511	0.344	5.04443e-12	0.167	PGM1	NE
ENSG00000095066	1.47361e-12	0.287471	0.61	0.443	5.39178e-08	0.167	HOOK2	NE
ENSG00000100243	4.07944e-16	0.569178	0.569	0.402	1.49262e-11	0.167	CYB5R3	NE
ENSG00000131747	1.79453e-68	0.396648	0.556	0.391	6.56601e-64	0.165	TOP2A	NE
ENSG00000120738	0.000498954	0.582963	0.251	0.087	1	0.164	EGR1	NE
ENSG00000187244	5.27862e-10	0.331708	0.262	0.098	1.93139e-05	0.164	BCAM	NE
ENSG00000113811	4.35486e-11	0.37477	0.659	0.496	1.5934e-06	0.163	SELENOK	NE
ENSG00000160888	8.26817e-12	0.782678	0.568	0.406	3.02524e-07	0.162	IER2	NE
ENSG00000280878	4.38571e-17	0.449685	0.205	0.044	1.60469e-12	0.161	AC017002.5	NE
ENSG00000051108	1.90253e-05	0.578384	0.572	0.412	0.696116	0.16	HERPUD1	NE
ENSG00000134152	1.1768e-06	0.732752	0.645	0.485	0.0430579	0.16	KATNBL1	NE
ENSG00000141580	1.92088e-06	0.490007	0.601	0.441	0.070283	0.16	WDR45B	NE
ENSG00000166145	5.12725e-06	0.30316	0.246	0.086	0.187601	0.16	SPINT1	NE
ENSG00000130513	7.76351e-05	1.41824	0.286	0.127	1	0.159	GDF15	NE
ENSG00000277775	2.01742e-80	0.272835	0.238	0.079	7.38154e-76	0.159	HIST1H3F	NE
ENSG00000175063	1.19809e-54	0.269414	0.547	0.389	4.38369e-50	0.158	UBE2C	NE
ENSG00000182901	3.2901e-11	0.454111	0.336	0.178	1.20381e-06	0.158	RGS7	NE
ENSG00000184489	5.65481e-17	0.432485	0.254	0.096	2.06904e-12	0.158	PTP4A3	NE
ENSG00000068903	1.70626e-18	0.374247	0.371	0.214	6.24304e-14	0.157	SIRT2	NE
ENSG00000157557	1.89308e-08	0.343004	0.337	0.18	0.000692659	0.157	ETS2	NE
ENSG00000164506	2.72298e-18	0.340545	0.535	0.378	9.9631e-14	0.157	STXBP5	NE
ENSG00000096696	3.47751e-08	0.264557	0.325	0.169	0.00127239	0.156	DSP	NE
ENSG00000183049	4.566e-18	0.335349	0.669	0.513	1.67065e-13	0.156	CAMK1D	NE
ENSG00000205517	6.70819e-11	0.306456	0.2	0.044	2.45446e-06	0.156	RGL3	NE
ENSG00000109107	7.59814e-20	0.294915	0.267	0.112	2.78008e-15	0.155	ALDOC	NE
ENSG00000177576	1.56341e-08	0.383207	0.594	0.439	0.000572038	0.155	C18orf32	NE
ENSG00000146592	0.000345399	0.559658	0.377	0.223	1	0.154	CREB5	NE
ENSG00000187017	6.51862e-19	0.316415	0.205	0.051	2.3851e-14	0.154	ESPN	NE
ENSG00000053371	3.48237e-27	0.388428	0.734	0.581	1.27416e-22	0.153	AKR7A2	NE
ENSG00000137941	1.72638e-14	0.273811	0.318	0.165	6.31666e-10	0.153	TTLL7	NE
ENSG00000206503	0.000579874	0.685987	0.594	0.441	1	0.153	HLA-A	NE
ENSG00000003147	1.80533e-08	0.286063	0.242	0.09	0.000660552	0.152	ICA1	NE
ENSG00000112379	2.98558e-08	0.305853	0.269	0.117	0.00109239	0.152	ARFGEF3	NE
ENSG00000170421	4.91789e-05	0.950315	0.409	0.257	1	0.152	KRT8	NE
ENSG00000100345	1.21557e-08	0.267594	0.438	0.287	0.000444764	0.151	MYH9	NE
ENSG00000166562	5.89636e-66	1.169	0.857	0.706	2.15742e-61	0.151	SEC11C	NE
ENSG00000116209	2.81193e-09	0.366575	0.651	0.501	0.000102886	0.15	TMEM59	NE
ENSG00000236830	6.13092e-05	0.33739	0.202	0.052	1	0.15	CBR3-AS1	NE
ENSG00000051523	1.06493e-07	0.664799	0.466	0.317	0.00389647	0.149	CYBA	NE
ENSG00000079459	2.46581e-31	0.501485	0.646	0.497	9.02217e-27	0.149	FDFT1	NE
ENSG00000100219	1.46294e-24	1.02024	0.603	0.455	5.35276e-20	0.148	XBP1	NE
ENSG00000105223	1.45433e-09	0.417627	0.626	0.478	5.32124e-05	0.148	PLD3	NE
ENSG00000112378	2.83374e-14	0.315908	0.385	0.237	1.03684e-09	0.148	PERP	NE
ENSG00000116014	5.34612e-21	0.267439	0.302	0.154	1.95609e-16	0.148	KISS1R	NE
ENSG00000120875	7.09107e-15	0.429477	0.206	0.058	2.59455e-10	0.148	DUSP4	NE
ENSG00000164096	4.59617e-09	0.555938	0.798	0.65	0.000168169	0.148	C4orf3	NE
ENSG00000168528	7.86831e-05	0.309116	0.237	0.089	1	0.148	SERINC2	NE
ENSG00000222041	0.000499699	0.595701	0.313	0.166	1	0.147	CYTOR	NE
ENSG00000109046	5.66147e-12	0.360371	0.672	0.526	2.07147e-07	0.146	WSB1	NE
ENSG00000092010	1.06046e-05	0.34187	0.544	0.399	0.388013	0.145	PSME1	NE
ENSG00000141837	3.32809e-11	0.587458	0.323	0.178	1.21771e-06	0.145	CACNA1A	NE
ENSG00000168883	4.266e-07	0.316357	0.599	0.454	0.0156089	0.145	USP39	NE
ENSG00000181449	1.60481e-38	0.303864	0.595	0.45	5.87184e-34	0.145	SOX2	NE
ENSG00000101421	0.00273986	0.332513	0.43	0.286	1	0.144	CHMP4B	NE
ENSG00000146733	1.46006e-22	0.691988	0.545	0.401	5.34221e-18	0.144	PSPH	NE
ENSG00000183831	1.29866e-08	0.735828	0.228	0.084	0.000475168	0.144	ANKRD45	NE
ENSG00000123358	2.486e-18	0.405175	0.228	0.085	9.09602e-14	0.143	NR4A1	NE
ENSG00000129354	8.47622e-10	0.250368	0.192	0.049	3.10136e-05	0.143	AP1M2	NE
ENSG00000169084	3.61972e-09	0.276255	0.521	0.378	0.000132442	0.143	DHRSX	NE
ENSG00000172354	5.50057e-10	0.319829	0.717	0.576	2.0126e-05	0.141	GNB2	NE
ENSG00000069667	4.09364e-10	0.272664	0.555	0.415	1.49782e-05	0.14	RORA	NE
ENSG00000117318	1.3264e-16	0.770013	0.366	0.226	4.85315e-12	0.14	ID3	NE
ENSG00000206573	0.00236053	0.454572	0.547	0.407	1	0.14	THUMPD3-AS1	NE
ENSG00000248771	8.9265e-13	0.313768	0.169	0.029	3.26612e-08	0.14	SMIM31	NE
ENSG00000139083	1.02461e-09	0.331081	0.293	0.154	3.74893e-05	0.139	ETV6	NE
ENSG00000164104	1.61694e-46	0.372425	0.766	0.627	5.91622e-42	0.139	HMGB2	NE
ENSG00000176406	4.72953e-13	0.281253	0.387	0.248	1.73049e-08	0.139	RIMS2	NE
ENSG00000180773	1.19258e-11	0.26405	0.491	0.352	4.36355e-07	0.139	SLC36A4	NE
ENSG00000062716	0.000502964	0.425587	0.566	0.428	1	0.138	VMP1	NE
ENSG00000078114	7.2605e-05	0.338825	0.204	0.066	1	0.138	NEBL	NE
ENSG00000113448	6.28184e-09	0.313876	0.571	0.433	0.000229846	0.138	PDE4D	NE
ENSG00000149809	3.87275e-07	0.265975	0.308	0.17	0.01417	0.138	TM7SF2	NE
ENSG00000124766	1.69083e-13	1.06541	0.879	0.742	6.18659e-09	0.137	SOX4	NE
ENSG00000148655	0.000664752	0.32349	0.286	0.149	1	0.137	LRMDA	NE
ENSG00000204308	1.47708e-07	0.28687	0.535	0.398	0.00540449	0.137	RNF5	NE
ENSG00000086666	1.18817e-06	0.26094	0.519	0.383	0.0434741	0.136	ZFAND6	NE
ENSG00000188580	4.41965e-28	0.360099	0.212	0.076	1.61711e-23	0.136	NKAIN2	NE
ENSG00000234745	1.13862e-05	0.455014	0.302	0.166	0.41661	0.136	HLA-B	NE
ENSG00000102109	1.79588e-09	0.334105	0.361	0.227	6.57095e-05	0.134	PCSK1N	NE
ENSG00000108551	8.86511e-20	0.546752	0.176	0.042	3.24365e-15	0.134	RASD1	NE
ENSG00000138069	3.92789e-06	0.347323	0.642	0.508	0.143718	0.134	RAB1A	NE
ENSG00000149418	0.000152326	0.253163	0.177	0.043	1	0.134	ST14	NE
ENSG00000157483	3.81842e-09	0.299312	0.417	0.283	0.000139712	0.134	MYO1E	NE
ENSG00000158769	4.0113e-05	0.28033	0.204	0.07	1	0.134	F11R	NE
ENSG00000172071	5.26967e-05	0.275675	0.249	0.115	1	0.134	EIF2AK3	NE
ENSG00000124785	4.55646e-25	0.312334	0.589	0.456	1.66716e-20	0.133	NRN1	NE
ENSG00000143384	9.52864e-06	0.279022	0.404	0.271	0.348643	0.133	MCL1	NE
ENSG00000102007	4.33052e-06	0.370498	0.678	0.546	0.158449	0.132	PLP2	NE
ENSG00000108679	0.00111346	0.443953	0.481	0.349	1	0.132	LGALS3BP	NE
ENSG00000178980	4.46179e-08	0.542506	0.8	0.668	0.00163252	0.132	SELENOW	NE
ENSG00000186480	3.48621e-13	0.325383	0.306	0.174	1.27557e-08	0.132	INSIG1	NE
ENSG00000103187	5.00773e-37	0.532156	0.744	0.613	1.83228e-32	0.131	COTL1	NE
ENSG00000135245	1.04599e-14	0.393491	0.534	0.403	3.82719e-10	0.131	HILPDA	NE
ENSG00000152413	2.66144e-13	0.656446	0.486	0.355	9.73794e-09	0.131	HOMER1	NE
ENSG00000213190	0.000580861	0.438586	0.495	0.365	1	0.13	MLLT11	NE
ENSG00000052802	1.75294e-11	0.431583	0.473	0.344	6.41383e-07	0.129	MSMO1	NE
ENSG00000096092	0.00430874	0.301985	0.292	0.163	1	0.129	TMEM14A	NE
ENSG00000128016	2.4025e-05	0.372126	0.168	0.039	0.879052	0.129	ZFP36	NE
ENSG00000133935	1.3612e-06	0.405216	0.466	0.337	0.0498049	0.129	ERG28	NE
ENSG00000067064	3.93788e-11	0.392642	0.46	0.332	1.44083e-06	0.128	IDI1	NE
ENSG00000168488	6.28813e-11	0.261571	0.545	0.417	2.30076e-06	0.128	ATXN2L	NE
ENSG00000140416	0.00104506	0.343394	0.559	0.432	1	0.127	TPM1	NE
ENSG00000143420	3.36078e-13	0.383106	0.792	0.665	1.22968e-08	0.127	ENSA	NE
ENSG00000171223	3.79091e-06	0.729786	0.454	0.328	0.138706	0.126	JUNB	NE
ENSG00000181061	2.3155e-08	0.260028	0.488	0.362	0.000847219	0.126	HIGD1A	NE
ENSG00000104549	1.4308e-25	0.370616	0.712	0.587	5.23517e-21	0.125	SQLE	NE
ENSG00000123999	1.91276e-21	0.385388	0.162	0.037	6.99859e-17	0.125	INHA	NE
ENSG00000171877	1.38949e-08	0.253713	0.346	0.221	0.0005084	0.125	FRMD5	NE
ENSG00000129116	1.39182e-08	0.390582	0.606	0.482	0.000509252	0.124	PALLD	NE
ENSG00000138495	1.07214e-08	0.316002	0.674	0.55	0.000392284	0.124	COX17	NE
ENSG00000103485	2.23311e-09	0.324217	0.759	0.636	8.17073e-05	0.123	QPRT	NE
ENSG00000155090	1.8057e-07	0.252166	0.281	0.158	0.00660689	0.123	KLF10	NE
ENSG00000169692	1.21882e-06	0.542927	0.423	0.3	0.0445955	0.123	AGPAT2	NE
ENSG00000236383	4.42846e-10	0.290789	0.377	0.254	1.62033e-05	0.123	CCDC200	NE
ENSG00000083067	2.77638e-37	0.288832	0.475	0.353	1.01585e-32	0.122	TRPM3	NE
ENSG00000120306	5.17135e-08	0.26326	0.693	0.571	0.00189214	0.122	CYSTM1	NE
ENSG00000140836	2.0957e-06	0.254157	0.413	0.291	0.0766796	0.122	ZFHX3	NE
ENSG00000145012	1.8357e-06	0.387627	0.473	0.351	0.0671663	0.122	LPP	NE
ENSG00000170345	0.00236274	0.555754	0.279	0.157	1	0.122	FOS	NE
ENSG00000035403	1.70319e-11	0.287094	0.501	0.38	6.23179e-07	0.121	VCL	NE
ENSG00000116260	0.0028268	0.271989	0.337	0.217	1	0.12	QSOX1	NE
ENSG00000174938	8.03844e-08	0.303399	0.233	0.113	0.00294118	0.12	SEZ6L2	NE
ENSG00000114405	3.16598e-12	0.285296	0.476	0.357	1.1584e-07	0.119	C3orf14	NE
ENSG00000124762	1.97106e-06	0.293952	0.285	0.166	0.0721193	0.119	CDKN1A	NE
ENSG00000006327	5.05162e-12	0.331372	0.316	0.198	1.84834e-07	0.118	TNFRSF12A	NE
ENSG00000136153	1.52096e-05	0.253329	0.291	0.173	0.556503	0.118	LMO7	NE
ENSG00000159212	0.001942	0.272161	0.17	0.052	1	0.118	CLIC6	NE
ENSG00000166922	9.09031e-07	0.347234	0.324	0.206	0.0332605	0.118	SCG5	NE
ENSG00000120690	0.000893231	0.260939	0.361	0.244	1	0.117	ELF1	NE
ENSG00000215845	8.90456e-05	0.265958	0.564	0.447	1	0.117	TSTD1	NE
ENSG00000122643	4.94075e-31	0.786214	0.757	0.641	1.80777e-26	0.116	NT5C3A	NE
ENSG00000172201	5.13902e-08	0.30791	0.205	0.089	0.00188032	0.116	ID4	NE
ENSG00000177189	1.04511e-05	0.272655	0.404	0.288	0.382394	0.116	RPS6KA3	NE
ENSG00000182718	1.06494e-34	0.339022	0.514	0.398	3.8965e-30	0.116	ANXA2	NE
ENSG00000158747	2.77933e-12	0.388864	0.198	0.083	1.01693e-07	0.115	NBL1	NE
ENSG00000178607	0.00231239	0.329064	0.22	0.105	1	0.115	ERN1	NE
ENSG00000104760	4.51687e-17	0.526365	0.129	0.015	1.65268e-12	0.114	FGL1	NE
ENSG00000123975	6.43047e-29	0.311421	0.788	0.674	2.35285e-24	0.114	CKS2	NE
ENSG00000139372	2.022e-06	0.25806	0.631	0.517	0.0739831	0.114	TDG	NE
ENSG00000145050	1.73243e-08	0.278791	0.694	0.58	0.000633879	0.114	MANF	NE
ENSG00000198355	8.23358e-12	0.254509	0.539	0.425	3.01258e-07	0.114	PIM3	NE
ENSG00000101608	0.00116961	0.481615	0.708	0.595	1	0.113	MYL12A	NE
ENSG00000102804	5.28298e-07	0.335481	0.7	0.587	0.0193299	0.113	TSC22D1	NE
ENSG00000117758	2.9695e-09	0.310974	0.347	0.234	0.000108651	0.113	STX12	NE
ENSG00000170381	2.02839e-09	0.28379	0.202	0.089	7.42169e-05	0.113	SEMA3E	NE
ENSG00000119782	1.26431e-05	0.255032	0.281	0.169	0.462597	0.112	FKBP1B	NE
ENSG00000076554	4.65423e-05	0.310846	0.634	0.523	1	0.111	TPD52	NE
ENSG00000112699	1.97953e-15	0.318229	0.756	0.645	7.24289e-11	0.111	GMDS	NE
ENSG00000161011	7.74794e-09	0.341022	0.645	0.534	0.000283489	0.111	SQSTM1	NE
ENSG00000183648	4.86827e-09	0.350519	0.814	0.703	0.000178125	0.111	NDUFB1	NE
ENSG00000185222	2.57669e-14	0.384602	0.717	0.606	9.42785e-10	0.111	TCEAL9	NE
ENSG00000114315	0.00316465	1.15403	0.465	0.355	1	0.11	HES1	NE
ENSG00000125968	4.10676e-18	0.71914	0.672	0.562	1.50262e-13	0.11	ID1	NE
ENSG00000250616	1.51355e-05	0.344541	0.418	0.308	0.553794	0.11	AC012645.1	NE
ENSG00000272398	1.49391e-12	0.904926	0.615	0.505	5.46607e-08	0.11	CD24	NE
ENSG00000105968	5.43695e-14	0.315441	0.788	0.679	1.98933e-09	0.109	H2AFV	NE
ENSG00000150991	6.78372e-11	0.423336	0.911	0.802	2.48209e-06	0.109	UBC	NE
ENSG00000164442	0.000787362	0.27534	0.273	0.164	1	0.109	CITED2	NE
ENSG00000180964	0.00384479	0.405734	0.668	0.559	1	0.109	TCEAL8	NE
ENSG00000125991	7.00357e-08	0.267336	0.767	0.659	0.00256254	0.108	ERGIC3	NE
ENSG00000137285	8.33107e-25	0.277465	0.894	0.786	3.04826e-20	0.108	TUBB2B	NE
ENSG00000053524	4.87787e-13	0.44946	0.207	0.1	1.78476e-08	0.107	MCF2L2	NE
ENSG00000146278	5.31202e-05	0.295467	0.463	0.356	1	0.107	PNRC1	NE
ENSG00000163382	4.43162e-17	0.291821	0.722	0.615	1.62148e-12	0.107	NAXE	NE
ENSG00000184840	6.82287e-06	0.353764	0.778	0.671	0.249642	0.107	TMED9	NE
ENSG00000050405	2.86451e-07	0.258901	0.436	0.33	0.010481	0.106	LIMA1	NE
ENSG00000077549	1.31504e-11	0.312646	0.73	0.624	4.8116e-07	0.106	CAPZB	NE
ENSG00000113732	1.38681e-14	0.255183	0.728	0.622	5.07422e-10	0.106	ATP6V0E1	NE
ENSG00000233237	9.09618e-19	0.409966	0.637	0.531	3.3282e-14	0.106	LINC00472	NE
ENSG00000115641	3.13537e-10	0.269055	0.441	0.336	1.1472e-05	0.105	FHL2	NE
ENSG00000134443	2.7624e-27	0.533485	0.113	0.008	1.01074e-22	0.105	GRP	NE
ENSG00000197061	7.48024e-168	1.11465	0.929	0.824	2.73695e-163	0.105	HIST1H4C	NE
ENSG00000135625	2.5658e-36	0.523652	0.109	0.005	9.38799e-32	0.104	EGR4	NE
ENSG00000136527	4.04956e-08	0.278703	0.747	0.643	0.0014817	0.104	TRA2B	NE
ENSG00000104723	6.00668e-08	0.310614	0.718	0.616	0.00219778	0.102	TUSC3	NE
ENSG00000146425	4.27007e-08	0.345953	0.846	0.744	0.00156237	0.102	DYNLT1	NE
ENSG00000265972	0.000771647	0.282917	0.262	0.16	1	0.102	TXNIP	NE
ENSG00000077782	1.75659e-09	0.282395	0.308	0.207	6.42718e-05	0.101	FGFR1	NE
ENSG00000116857	0.000836679	0.265719	0.536	0.435	1	0.101	TMEM9	NE
ENSG00000103769	0.000774776	0.315909	0.768	0.668	1	0.1	RAB11A	NE
ENSG00000181722	0.00055041	0.284192	0.469	0.371	1	0.098	ZBTB20	NE
ENSG00000245532	4.93571e-12	0.495986	0.926	0.83	1.80593e-07	0.096	NEAT1	NE
ENSG00000086598	6.22594e-10	0.262078	0.705	0.609	2.27801e-05	0.096	TMED2	NE
ENSG00000087074	7.28558e-07	0.260563	0.297	0.201	0.0266572	0.096	PPP1R15A	NE
ENSG00000132386	0.000581262	0.326794	0.517	0.421	1	0.096	SERPINF1	NE
ENSG00000168374	4.3295e-05	0.283859	0.705	0.609	1	0.096	ARF4	NE
ENSG00000068745	0.00387097	0.282159	0.62	0.525	1	0.095	IP6K2	NE
ENSG00000166295	6.35516e-12	0.301557	0.867	0.772	2.32529e-07	0.095	ANAPC16	NE
ENSG00000186474	9.33235e-16	0.418555	0.106	0.011	3.41461e-11	0.095	KLK12	NE
ENSG00000112972	2.74778e-05	0.317395	0.397	0.304	1	0.093	HMGCS1	NE
ENSG00000029993	1.56254e-21	0.586159	0.749	0.657	5.71719e-17	0.092	HMGB3	NE
ENSG00000157005	1.44622e-08	0.49491	0.109	0.019	0.000529159	0.09	SST	NE
ENSG00000184983	1.90402e-19	0.338707	0.875	0.785	6.9666e-15	0.09	NDUFA6	NE
ENSG00000142871	7.78823e-07	0.286668	0.19	0.103	0.0284964	0.087	CCN1	NE
ENSG00000101439	3.58039e-10	0.339989	0.91	0.826	1.31003e-05	0.084	CST3	NE
ENSG00000111057	7.24426e-45	1.5568	0.494	0.411	2.6506e-40	0.083	KRT18	NE
ENSG00000205542	0.000919304	0.782887	0.88	0.797	1	0.083	TMSB4X	NE
ENSG00000065911	9.12285e-17	0.275739	0.812	0.73	3.33796e-12	0.082	MTHFD2	NE
ENSG00000099194	1.50688e-13	0.298947	0.551	0.469	5.51353e-09	0.082	SCD	NE
ENSG00000171951	1.02516e-07	0.354725	0.1	0.018	0.00375096	0.082	SCG2	NE
ENSG00000171314	5.93485e-11	0.334736	0.869	0.789	2.1715e-06	0.08	PGAM1	NE
ENSG00000221869	1.87119e-09	0.29257	0.295	0.215	6.8465e-05	0.08	CEBPD	NE
ENSG00000166710	3.47793e-31	0.521032	0.773	0.695	1.27254e-26	0.078	B2M	NE
ENSG00000118680	4.18888e-05	0.329165	0.825	0.747	1	0.078	MYL12B	NE
ENSG00000143742	2.42785e-18	0.358933	0.889	0.812	8.88325e-14	0.077	SRP9	NE
ENSG00000170296	2.21932e-06	0.444259	0.902	0.827	0.0812027	0.075	GABARAP	NE
ENSG00000133872	0.000806068	0.260323	0.67	0.597	1	0.073	SARAF	NE
ENSG00000204387	1.04593e-05	0.322897	0.675	0.602	0.382696	0.073	SNHG32	NE
ENSG00000160752	6.40082e-27	0.3232	0.842	0.769	2.34199e-22	0.073	FDPS	NE
ENSG00000114023	1.54437e-15	0.336017	0.889	0.817	5.6507e-11	0.072	FAM162A	NE
ENSG00000169564	3.72849e-07	0.261544	0.838	0.769	0.0136422	0.069	PCBP1	NE
ENSG00000242242	7.26463e-10	1.52556	0.652	0.584	2.65806e-05	0.068	NECTIN3-AS1	NE
ENSG00000136888	0.000843165	0.322197	0.895	0.829	1	0.066	ATP6V1G1	NE
ENSG00000254999	2.6932e-06	0.320764	0.929	0.863	0.0985413	0.066	BRK1	NE
ENSG00000167004	0.00127502	0.283368	0.834	0.768	1	0.066	PDIA3	NE
ENSG00000144485	4.5593e-81	0.469292	0.925	0.861	1.6682e-76	0.064	HES6	NE
ENSG00000100650	2.33627e-12	0.264446	0.84	0.776	8.54819e-08	0.064	SRSF5	NE
ENSG00000125868	0.000112134	0.457745	0.939	0.876	1	0.063	DSTN	NE
ENSG00000145247	1.32621e-10	0.44332	0.572	0.511	4.85247e-06	0.061	OCIAD2	NE
ENSG00000118418	4.47737e-06	0.326616	0.925	0.865	0.163822	0.06	HMGN3	NE
ENSG00000185624	1.07194e-10	0.383366	0.921	0.862	3.92214e-06	0.059	P4HB	NE
ENSG00000092841	2.32638e-08	0.497376	0.975	0.917	0.000851199	0.058	MYL6	NE
ENSG00000205581	1.26989e-07	0.29319	0.95	0.893	0.00464639	0.057	HMGN1	NE
ENSG00000008394	0.00466125	0.27593	0.885	0.831	1	0.054	MGST1	NE
ENSG00000176171	0.00034497	0.457125	0.881	0.827	1	0.054	BNIP3	NE
ENSG00000132432	0.000110103	0.363825	0.945	0.892	1	0.053	SEC61G	NE
ENSG00000102144	4.294e-20	0.737803	0.931	0.879	1.57113e-15	0.052	PGK1	NE
ENSG00000131051	5.53356e-10	0.266893	0.935	0.883	2.02467e-05	0.052	RBM39	NE
ENSG00000143933	3.43124e-20	0.520194	0.98	0.929	1.25546e-15	0.051	CALM2	NE
ENSG00000123562	0.0027805	0.394538	0.935	0.887	1	0.048	MORF4L2	NE
ENSG00000054148	1.47927e-14	0.288164	0.971	0.924	5.41251e-10	0.047	PHPT1	NE
ENSG00000230989	2.73187e-07	0.273842	0.949	0.902	0.00999565	0.047	HSBP1	NE
ENSG00000127540	3.26785e-15	0.315311	0.979	0.934	1.19567e-10	0.045	UQCR11	NE
ENSG00000108518	2.41695e-13	0.286684	0.993	0.952	8.84337e-09	0.041	PFN1	NE
ENSG00000125977	1.68486e-13	0.250222	0.929	0.888	6.16473e-09	0.041	EIF2S2	NE
ENSG00000134308	1.73718e-05	0.261606	0.917	0.877	0.635618	0.04	YWHAQ	NE
ENSG00000115457	9.35953e-69	1.50025	0.982	0.944	3.42456e-64	0.038	IGFBP2	NE
ENSG00000125148	2.44276e-14	0.255051	0.389	0.353	8.93781e-10	0.036	MT2A	NE
ENSG00000185737	3.44429e-09	0.288782	0.223	0.187	0.000126023	0.036	NRG3	NE
ENSG00000164405	1.84315e-08	0.313461	0.966	0.931	0.000674389	0.035	UQCRQ	NE
ENSG00000112695	3.02457e-13	0.456551	0.99	0.956	1.10666e-08	0.034	COX7A2	NE
ENSG00000132475	0.000235588	0.554366	0.981	0.951	1	0.03	H3F3B	NE
ENSG00000170315	1.76727e-09	0.287488	0.988	0.961	6.46627e-05	0.027	UBB	NE
ENSG00000111669	2.43397e-17	0.465708	0.992	0.971	8.90564e-13	0.021	TPI1	NE
ENSG00000166165	5.52113e-47	0.311267	0.961	0.94	2.02012e-42	0.021	CKB	NE
ENSG00000172757	2.70775e-14	0.285813	0.991	0.971	9.90737e-10	0.02	CFL1	NE
ENSG00000067225	1.4866e-16	0.356058	0.981	0.962	5.4393e-12	0.019	PKM	NE
ENSG00000167552	4.08041e-19	0.257582	0.89	0.871	1.49298e-14	0.019	TUBA1A	NE
ENSG00000140264	9.83388e-06	0.407416	0.995	0.977	0.359812	0.018	SERF2	NE
ENSG00000134333	4.62785e-16	0.313483	0.99	0.974	1.69328e-11	0.016	LDHA	NE
ENSG00000074800	2.82912e-30	0.398012	0.998	0.986	1.03515e-25	0.012	ENO1	NE
ENSG00000075624	7.91785e-14	0.462549	0.996	0.985	2.89706e-09	0.011	ACTB	NE
ENSG00000071082	0.00798864	0.454346	0.999	0.991	1	0.008	RPL31	NE
ENSG00000240972	2.2666e-17	0.293435	1	0.992	8.29325e-13	0.008	MIF	NE
ENSG00000111640	1.23554e-05	0.291206	1	0.995	0.452073	0.005	GAPDH	NE
ENSG00000251562	4.40965e-46	1.15228	1	0.997	1.61345e-41	0.003	MALAT1	NE
ENSG00000168209	0.000116726	0.34054	0.687	0.695	1	-0.008	DDIT4	NE
ENSG00000185559	1.96487e-17	0.400575	0.378	0.397	7.18925e-13	-0.019	DLK1	NE
ENSG00000162992	0	1.39104	0.655	0.027	0	0.628	NEUROD1	NE-Variant
ENSG00000107105	0	1.44938	0.638	0.089	0	0.549	ELAVL2	NE-Variant
ENSG00000137142	6.90842e-275	1.20934	0.649	0.142	2.52772e-270	0.507	IGFBPL1	NE-Variant
ENSG00000064655	5.34121e-297	1.46791	0.629	0.16	1.9543e-292	0.469	EYA2	NE-Variant
ENSG00000164330	6.51039e-297	1.30743	0.474	0.022	2.38209e-292	0.452	EBF1	NE-Variant
ENSG00000104435	1.9497e-274	1.795	0.47	0.023	7.13375e-270	0.447	STMN2	NE-Variant
ENSG00000196361	4.87797e-201	0.881644	0.481	0.063	1.7848e-196	0.418	ELAVL3	NE-Variant
ENSG00000168280	1.594e-200	0.934056	0.657	0.241	5.83229e-196	0.416	KIF5C	NE-Variant
ENSG00000104112	1.87405e-181	0.828252	0.452	0.05	6.85696e-177	0.402	SCG3	NE-Variant
ENSG00000160145	7.21145e-166	0.949637	0.548	0.155	2.6386e-161	0.393	KALRN	NE-Variant
ENSG00000180616	4.3318e-222	0.808112	0.428	0.038	1.58496e-217	0.39	SSTR2	NE-Variant
ENSG00000139767	5.3661e-213	0.708587	0.413	0.024	1.9634e-208	0.389	SRRM4	NE-Variant
ENSG00000152217	4.34843e-105	0.782164	0.566	0.21	1.59105e-100	0.356	SETBP1	NE-Variant
ENSG00000167641	7.31855e-229	1.07423	0.512	0.172	2.67779e-224	0.34	PPP1R14A	NE-Variant
ENSG00000272398	3.09299e-98	0.874583	0.831	0.493	1.13169e-93	0.338	CD24	NE-Variant
ENSG00000078018	1.74698e-96	0.9358	0.534	0.198	6.39202e-92	0.336	MAP2	NE-Variant
ENSG00000250305	2.61924e-145	0.638474	0.378	0.047	9.58352e-141	0.331	TRMT9B	NE-Variant
ENSG00000137941	1.37159e-100	0.597135	0.485	0.158	5.01851e-96	0.327	TTLL7	NE-Variant
ENSG00000144834	4.30674e-154	0.727454	0.443	0.12	1.57579e-149	0.323	TAGLN3	NE-Variant
ENSG00000108001	2.81044e-128	0.782061	0.45	0.128	1.02831e-123	0.322	EBF3	NE-Variant
ENSG00000185008	8.99383e-137	1.12067	0.573	0.252	3.29075e-132	0.321	ROBO2	NE-Variant
ENSG00000168785	1.04575e-102	0.717458	0.67	0.353	3.82629e-98	0.317	TSPAN5	NE-Variant
ENSG00000176788	6.23012e-204	1.10351	0.762	0.451	2.27954e-199	0.311	BASP1	NE-Variant
ENSG00000276644	1.85587e-227	1.34976	0.702	0.395	6.79044e-223	0.307	DACH1	NE-Variant
ENSG00000272168	1.18217e-69	0.848112	0.488	0.184	4.32544e-65	0.304	CASC15	NE-Variant
ENSG00000090097	4.02548e-131	0.701561	0.513	0.22	1.47288e-126	0.293	PCBP4	NE-Variant
ENSG00000258947	6.8004e-177	1.12503	0.887	0.598	2.4882e-172	0.289	TUBB3	NE-Variant
ENSG00000124785	7.09372e-100	0.796393	0.737	0.449	2.59552e-95	0.288	NRN1	NE-Variant
ENSG00000166206	9.07536e-119	0.604818	0.474	0.186	3.32058e-114	0.288	GABRB3	NE-Variant
ENSG00000112137	5.55797e-97	0.632191	0.414	0.13	2.0336e-92	0.284	PHACTR1	NE-Variant
ENSG00000173404	5.67179e-141	0.566911	0.298	0.019	2.07525e-136	0.279	INSM1	NE-Variant
ENSG00000149926	5.31291e-128	0.512384	0.324	0.048	1.94394e-123	0.276	TLCD3B	NE-Variant
ENSG00000102003	9.60947e-73	0.545221	0.406	0.131	3.51601e-68	0.275	SYP	NE-Variant
ENSG00000106341	6.62779e-204	0.688826	0.278	0.004	2.42504e-199	0.274	PPP1R17	NE-Variant
ENSG00000010810	1.55103e-95	0.696566	0.613	0.34	5.67506e-91	0.273	FYN	NE-Variant
ENSG00000196526	1.7335e-92	0.547333	0.432	0.161	6.3427e-88	0.271	AFAP1	NE-Variant
ENSG00000179915	1.41847e-103	0.803016	0.358	0.095	5.19003e-99	0.263	NRXN1	NE-Variant
ENSG00000176406	4.23393e-41	0.714432	0.503	0.244	1.54915e-36	0.259	RIMS2	NE-Variant
ENSG00000221818	3.81889e-146	0.758901	0.27	0.012	1.3973e-141	0.258	EBF2	NE-Variant
ENSG00000127824	1.61249e-95	0.53519	0.386	0.131	5.89994e-91	0.255	TUBA4A	NE-Variant
ENSG00000283982	2.94484e-117	0.54343	0.281	0.029	1.07749e-112	0.252	AL445623.2	NE-Variant
ENSG00000144229	4.44304e-131	0.915129	0.285	0.035	1.62566e-126	0.25	THSD7B	NE-Variant
ENSG00000174938	1.95342e-88	0.489054	0.355	0.107	7.14735e-84	0.248	SEZ6L2	NE-Variant
ENSG00000077264	5.75706e-56	0.664162	0.478	0.232	2.10645e-51	0.246	PAK3	NE-Variant
ENSG00000143344	6.78601e-48	0.536475	0.462	0.216	2.48293e-43	0.246	RGL1	NE-Variant
ENSG00000145087	6.3369e-112	0.505693	0.277	0.033	2.31861e-107	0.244	STXBP5L	NE-Variant
ENSG00000213190	8.59673e-106	0.919987	0.604	0.361	3.14546e-101	0.243	MLLT11	NE-Variant
ENSG00000100604	3.91082e-105	0.602588	0.266	0.024	1.43093e-100	0.242	CHGA	NE-Variant
ENSG00000100060	2.36943e-63	0.438291	0.428	0.187	8.66951e-59	0.241	MFNG	NE-Variant
ENSG00000177679	9.54946e-82	0.408053	0.295	0.056	3.49405e-77	0.239	SRRM3	NE-Variant
ENSG00000182674	1.14762e-88	0.548133	0.326	0.087	4.19904e-84	0.239	KCNB2	NE-Variant
ENSG00000184113	1.11616e-64	1.11388	0.341	0.106	4.08393e-60	0.235	CLDN5	NE-Variant
ENSG00000172020	2.67246e-143	0.658554	0.387	0.153	9.77825e-139	0.234	GAP43	NE-Variant
ENSG00000141837	2.51272e-71	0.696887	0.408	0.176	9.19378e-67	0.232	CACNA1A	NE-Variant
ENSG00000116717	7.01968e-99	0.775966	0.662	0.431	2.56843e-94	0.231	GADD45A	NE-Variant
ENSG00000158164	1.18354e-66	0.47412	0.34	0.11	4.33044e-62	0.23	TMSB15A	NE-Variant
ENSG00000171533	8.96469e-71	0.474689	0.341	0.112	3.28009e-66	0.229	MAP6	NE-Variant
ENSG00000143355	3.51774e-121	0.54384	0.249	0.021	1.28711e-116	0.228	LHX9	NE-Variant
ENSG00000114757	1.45752e-74	0.494098	0.319	0.092	5.33291e-70	0.227	PEX5L	NE-Variant
ENSG00000154310	5.42e-67	0.512448	0.316	0.093	1.98312e-62	0.223	TNIK	NE-Variant
ENSG00000187323	1.60108e-77	1.37945	0.47	0.248	5.85819e-73	0.222	DCC	NE-Variant
ENSG00000145920	2.08786e-93	0.388915	0.252	0.031	7.63927e-89	0.221	CPLX2	NE-Variant
ENSG00000213578	2.15737e-122	0.717877	0.284	0.063	7.89359e-118	0.221	CPLX3	NE-Variant
ENSG00000163618	1.01946e-113	0.669004	0.242	0.023	3.73008e-109	0.219	CADPS	NE-Variant
ENSG00000165113	1.27451e-130	0.826278	0.488	0.269	4.6633e-126	0.219	GKAP1	NE-Variant
ENSG00000080200	1.83722e-60	0.403544	0.324	0.106	6.72222e-56	0.218	CRYBG3	NE-Variant
ENSG00000124194	4.73706e-90	0.388954	0.263	0.045	1.73324e-85	0.218	GDAP1L1	NE-Variant
ENSG00000185942	5.557e-102	0.948445	0.51	0.293	2.03325e-97	0.217	NKAIN3	NE-Variant
ENSG00000231607	6.54152e-65	0.704404	0.622	0.406	2.39348e-60	0.216	DLEU2	NE-Variant
ENSG00000188452	1.93632e-115	0.409163	0.231	0.016	7.08479e-111	0.215	CERKL	NE-Variant
ENSG00000151746	9.63033e-110	0.710442	0.625	0.411	3.52364e-105	0.214	BICD1	NE-Variant
ENSG00000225783	4.37114e-37	0.45885	0.414	0.201	1.59936e-32	0.213	MIAT	NE-Variant
ENSG00000164929	1.20176e-85	0.690987	0.242	0.03	4.3971e-81	0.212	BAALC	NE-Variant
ENSG00000121905	6.59931e-136	0.378859	0.217	0.006	2.41462e-131	0.211	HPCA	NE-Variant
ENSG00000151892	1.75387e-76	0.354676	0.238	0.028	6.41725e-72	0.21	GFRA1	NE-Variant
ENSG00000117069	2.07702e-68	0.413849	0.27	0.061	7.59959e-64	0.209	ST6GALNAC5	NE-Variant
ENSG00000174871	1.2102e-58	0.384959	0.341	0.134	4.42802e-54	0.207	CNIH2	NE-Variant
ENSG00000185477	2.5605e-89	0.361149	0.235	0.029	9.36862e-85	0.206	GPRIN3	NE-Variant
ENSG00000152495	1.98541e-73	0.518514	0.357	0.152	7.26441e-69	0.205	CAMK4	NE-Variant
ENSG00000189056	8.20665e-83	0.54509	0.253	0.048	3.00273e-78	0.205	RELN	NE-Variant
ENSG00000132639	5.9603e-63	0.482108	0.29	0.088	2.18081e-58	0.202	SNAP25	NE-Variant
ENSG00000168916	2.25147e-42	0.462511	0.389	0.187	8.23789e-38	0.202	ZNF608	NE-Variant
ENSG00000072832	4.95677e-67	0.472614	0.473	0.273	1.81363e-62	0.2	CRMP1	NE-Variant
ENSG00000053438	9.67933e-15	0.257483	0.488	0.289	3.54157e-10	0.199	NNAT	NE-Variant
ENSG00000130449	3.55857e-18	0.342503	0.434	0.235	1.30205e-13	0.199	ZSWIM6	NE-Variant
ENSG00000100095	7.31461e-108	0.682842	0.211	0.013	2.67634e-103	0.198	SEZ6L	NE-Variant
ENSG00000118922	1.67508e-48	0.509814	0.413	0.215	6.12895e-44	0.198	KLF12	NE-Variant
ENSG00000144218	4.80213e-49	0.61914	0.357	0.159	1.75705e-44	0.198	AFF3	NE-Variant
ENSG00000182916	1.91316e-42	0.45291	0.435	0.238	7.00006e-38	0.197	TCEAL7	NE-Variant
ENSG00000138606	1.35539e-77	0.365735	0.29	0.096	4.95923e-73	0.194	SHF	NE-Variant
ENSG00000075618	2.29978e-52	0.329747	0.45	0.257	8.41466e-48	0.193	FSCN1	NE-Variant
ENSG00000152192	3.53683e-55	0.309859	0.245	0.053	1.29409e-50	0.192	POU4F1	NE-Variant
ENSG00000152932	1.16238e-55	0.378035	0.372	0.18	4.25304e-51	0.192	RAB3C	NE-Variant
ENSG00000152208	2.69317e-85	0.846793	0.313	0.122	9.85403e-81	0.191	GRID2	NE-Variant
ENSG00000162374	2.05684e-86	0.417328	0.224	0.033	7.52578e-82	0.191	ELAVL4	NE-Variant
ENSG00000205542	0	1.39674	0.983	0.792	0	0.191	TMSB4X	NE-Variant
ENSG00000067715	2.84961e-87	0.730397	0.695	0.506	1.04265e-82	0.189	SYT1	NE-Variant
ENSG00000169760	2.5039e-26	0.442738	0.394	0.206	9.16151e-22	0.188	NLGN1	NE-Variant
ENSG00000133169	9.03215e-71	0.590341	0.839	0.653	3.30477e-66	0.186	BEX1	NE-Variant
ENSG00000175183	1.12386e-45	0.373553	0.551	0.365	4.11209e-41	0.186	CSRP2	NE-Variant
ENSG00000175274	4.04701e-57	0.313073	0.232	0.047	1.48076e-52	0.185	TP53I11	NE-Variant
ENSG00000141314	3.77127e-68	0.369929	0.277	0.093	1.37987e-63	0.184	RHBDL3	NE-Variant
ENSG00000155093	7.70992e-37	0.494156	0.351	0.167	2.82098e-32	0.184	PTPRN2	NE-Variant
ENSG00000171604	2.72055e-70	0.418611	0.385	0.201	9.95422e-66	0.184	CXXC5	NE-Variant
ENSG00000138411	1.46584e-64	0.374517	0.263	0.081	5.36337e-60	0.182	HECW2	NE-Variant
ENSG00000157216	6.28254e-58	0.47711	0.568	0.386	2.29872e-53	0.182	SSBP3	NE-Variant
ENSG00000162545	1.03749e-75	0.370931	0.241	0.06	3.79606e-71	0.181	CAMK2N1	NE-Variant
ENSG00000066032	1.21339e-59	0.581306	0.243	0.063	4.43966e-55	0.18	CTNNA2	NE-Variant
ENSG00000142669	4.25977e-49	0.529761	0.583	0.403	1.55861e-44	0.18	SH3BGRL3	NE-Variant
ENSG00000049759	6.03923e-18	0.38328	0.435	0.256	2.2097e-13	0.179	NEDD4L	NE-Variant
ENSG00000089199	1.33441e-65	0.329629	0.207	0.028	4.88247e-61	0.179	CHGB	NE-Variant
ENSG00000175426	1.09239e-108	0.852298	0.186	0.008	3.99694e-104	0.178	PCSK1	NE-Variant
ENSG00000196220	1.14251e-106	0.742541	0.541	0.363	4.18032e-102	0.178	SRGAP3	NE-Variant
ENSG00000153707	9.96557e-77	0.762884	0.513	0.336	3.6463e-72	0.177	PTPRD	NE-Variant
ENSG00000245694	4.49891e-33	0.435975	0.648	0.471	1.64611e-28	0.177	CRNDE	NE-Variant
ENSG00000176887	6.05958e-87	0.6439	0.664	0.488	2.21714e-82	0.176	SOX11	NE-Variant
ENSG00000171786	1.43283e-100	0.37945	0.182	0.007	5.24259e-96	0.175	NHLH1	NE-Variant
ENSG00000262484	1.22503e-81	0.344435	0.193	0.018	4.48227e-77	0.175	CCER2	NE-Variant
ENSG00000109472	4.6744e-84	0.791027	0.685	0.512	1.71032e-79	0.173	CPE	NE-Variant
ENSG00000114405	6.48917e-55	0.483085	0.53	0.357	2.37432e-50	0.173	C3orf14	NE-Variant
ENSG00000105290	9.43163e-50	0.451438	0.277	0.105	3.45094e-45	0.172	APLP1	NE-Variant
ENSG00000156299	3.55604e-47	0.373676	0.45	0.278	1.30112e-42	0.172	TIAM1	NE-Variant
ENSG00000165061	1.15737e-35	0.498168	0.239	0.067	4.23471e-31	0.172	ZMAT4	NE-Variant
ENSG00000113448	5.20685e-54	0.711814	0.606	0.435	1.90514e-49	0.171	PDE4D	NE-Variant
ENSG00000184305	1.57544e-71	0.809349	0.685	0.514	5.76439e-67	0.171	CCSER1	NE-Variant
ENSG00000185666	4.18752e-62	0.565051	0.211	0.04	1.53217e-57	0.171	SYN3	NE-Variant
ENSG00000106689	1.84584e-97	0.377685	0.179	0.009	6.75373e-93	0.17	LHX2	NE-Variant
ENSG00000183580	2.98125e-50	0.6114	0.462	0.292	1.09081e-45	0.17	FBXL7	NE-Variant
ENSG00000177576	1.34329e-66	0.601447	0.611	0.442	4.91496e-62	0.169	C18orf32	NE-Variant
ENSG00000180998	3.48844e-38	0.390196	0.256	0.087	1.27638e-33	0.169	GPR137C	NE-Variant
ENSG00000112232	5.28735e-36	0.504019	0.455	0.288	1.93459e-31	0.167	KHDRBS2	NE-Variant
ENSG00000119547	2.30424e-68	0.500792	0.4	0.233	8.43097e-64	0.167	ONECUT2	NE-Variant
ENSG00000153956	1.03722e-157	1.12382	0.741	0.574	3.79507e-153	0.167	CACNA2D1	NE-Variant
ENSG00000134986	9.95729e-42	0.42061	0.593	0.427	3.64327e-37	0.166	NREP	NE-Variant
ENSG00000155816	9.04807e-39	0.346898	0.294	0.128	3.3106e-34	0.166	FMN2	NE-Variant
ENSG00000187231	9.46135e-25	0.295458	0.372	0.206	3.46181e-20	0.166	SESTD1	NE-Variant
ENSG00000188641	3.06669e-42	0.411702	0.225	0.06	1.12207e-37	0.165	DPYD	NE-Variant
ENSG00000136854	3.57744e-44	0.312151	0.371	0.208	1.30895e-39	0.163	STXBP1	NE-Variant
ENSG00000166922	9.08824e-46	0.571792	0.369	0.206	3.3253e-41	0.163	SCG5	NE-Variant
ENSG00000078699	1.06316e-31	0.438102	0.436	0.274	3.89001e-27	0.162	CBFA2T2	NE-Variant
ENSG00000110436	9.19921e-40	0.330502	0.253	0.091	3.3659e-35	0.162	SLC1A2	NE-Variant
ENSG00000139910	7.57529e-43	0.433749	0.516	0.355	2.77172e-38	0.161	NOVA1	NE-Variant
ENSG00000168779	2.6744e-58	0.321444	0.203	0.042	9.78536e-54	0.161	SHOX2	NE-Variant
ENSG00000064042	1.56292e-35	0.499718	0.329	0.169	5.71857e-31	0.16	LIMCH1	NE-Variant
ENSG00000127124	8.10444e-43	0.340351	0.222	0.062	2.96533e-38	0.16	HIVEP3	NE-Variant
ENSG00000015592	3.35756e-86	0.684819	0.166	0.007	1.2285e-81	0.159	STMN4	NE-Variant
ENSG00000157005	5.78663e-72	2.85001	0.175	0.016	2.11727e-67	0.159	SST	NE-Variant
ENSG00000077279	2.43053e-86	0.383273	0.164	0.006	8.89305e-82	0.158	DCX	NE-Variant
ENSG00000176463	4.83996e-43	0.273063	0.255	0.097	1.77089e-38	0.158	SLCO3A1	NE-Variant
ENSG00000149294	5.50199e-45	0.464381	0.488	0.331	2.01312e-40	0.157	NCAM1	NE-Variant
ENSG00000101412	3.55334e-66	0.421127	0.418	0.262	1.30013e-61	0.156	E2F1	NE-Variant
ENSG00000104765	5.77894e-28	0.339975	0.443	0.288	2.11445e-23	0.155	BNIP3L	NE-Variant
ENSG00000135333	1.55742e-36	0.397817	0.267	0.112	5.69845e-32	0.155	EPHA7	NE-Variant
ENSG00000151640	2.64921e-51	0.277461	0.239	0.084	9.6932e-47	0.155	DPYSL4	NE-Variant
ENSG00000005108	5.98338e-39	0.670622	0.222	0.068	2.18926e-34	0.154	THSD7A	NE-Variant
ENSG00000101460	2.97491e-29	0.360642	0.249	0.096	1.08849e-24	0.153	MAP1LC3A	NE-Variant
ENSG00000101489	2.70272e-48	0.338721	0.236	0.083	9.88899e-44	0.153	CELF4	NE-Variant
ENSG00000152128	3.2856e-31	0.335125	0.221	0.068	1.20217e-26	0.153	TMEM163	NE-Variant
ENSG00000203879	3.39533e-28	0.287817	0.385	0.232	1.24232e-23	0.153	GDI1	NE-Variant
ENSG00000249413	5.60808e-54	0.54533	0.533	0.38	2.05194e-49	0.153	AC116049.2	NE-Variant
ENSG00000153714	7.74059e-18	0.308416	0.248	0.096	2.8322e-13	0.152	LURAP1L	NE-Variant
ENSG00000084676	2.31231e-35	0.438882	0.49	0.339	8.4605e-31	0.151	NCOA1	NE-Variant
ENSG00000092964	1.65711e-40	0.375439	0.494	0.343	6.06318e-36	0.151	DPYSL2	NE-Variant
ENSG00000134532	1.06082e-31	0.466488	0.432	0.281	3.88144e-27	0.151	SOX5	NE-Variant
ENSG00000072657	1.71149e-53	0.43492	0.269	0.119	6.26217e-49	0.15	TRHDE	NE-Variant
ENSG00000139946	5.77124e-21	0.305607	0.27	0.121	2.11164e-16	0.149	PELI2	NE-Variant
ENSG00000121410	7.00045e-28	0.324267	0.401	0.253	2.56139e-23	0.148	A1BG	NE-Variant
ENSG00000171951	1.76178e-52	0.483175	0.164	0.016	6.44616e-48	0.148	SCG2	NE-Variant
ENSG00000177606	4.56922e-09	0.326689	0.487	0.339	0.000167183	0.148	JUN	NE-Variant
ENSG00000174939	2.28556e-43	0.266907	0.249	0.102	8.36262e-39	0.147	ASPHD1	NE-Variant
ENSG00000109265	5.54843e-58	0.507019	0.599	0.453	2.03012e-53	0.146	KIAA1211	NE-Variant
ENSG00000162873	2.23365e-64	0.265289	0.161	0.016	8.1727e-60	0.145	KLHDC8A	NE-Variant
ENSG00000164418	2.98095e-32	0.304279	0.263	0.118	1.0907e-27	0.145	GRIK2	NE-Variant
ENSG00000174145	8.16487e-69	0.26595	0.172	0.027	2.98744e-64	0.145	NWD2	NE-Variant
ENSG00000141433	7.89679e-72	0.273573	0.158	0.014	2.88936e-67	0.144	ADCYAP1	NE-Variant
ENSG00000162188	2.29849e-67	0.356185	0.154	0.01	8.40995e-63	0.144	GNG3	NE-Variant
ENSG00000225792	5.1136e-54	0.281811	0.207	0.063	1.87101e-49	0.144	AC004540.2	NE-Variant
ENSG00000089356	1.58463e-60	1.18983	0.179	0.036	5.79801e-56	0.143	FXYD3	NE-Variant
ENSG00000147488	1.76552e-59	0.302155	0.155	0.012	6.45984e-55	0.143	ST18	NE-Variant
ENSG00000182901	4.38302e-30	0.492501	0.327	0.184	1.6037e-25	0.143	RGS7	NE-Variant
ENSG00000185630	1.8646e-44	0.462361	0.589	0.446	6.82238e-40	0.143	PBX1	NE-Variant
ENSG00000109906	3.1459e-48	0.286745	0.179	0.037	1.15105e-43	0.142	ZBTB16	NE-Variant
ENSG00000132359	9.78821e-33	0.414394	0.365	0.223	3.58141e-28	0.142	RAP1GAP2	NE-Variant
ENSG00000188107	1.83123e-42	0.419675	0.211	0.07	6.70027e-38	0.141	EYS	NE-Variant
ENSG00000254560	2.47015e-35	0.344135	0.305	0.164	9.03802e-31	0.141	BBOX1-AS1	NE-Variant
ENSG00000118263	5.15105e-25	0.323907	0.327	0.187	1.88472e-20	0.14	KLF7	NE-Variant
ENSG00000127995	2.30637e-27	0.267945	0.33	0.19	8.43876e-23	0.14	CASD1	NE-Variant
ENSG00000227906	5.84811e-37	0.360374	0.19	0.05	2.13977e-32	0.14	SNAP25-AS1	NE-Variant
ENSG00000066382	3.6874e-48	0.470935	0.322	0.183	1.34918e-43	0.139	MPPED2	NE-Variant
ENSG00000198794	2.87238e-29	0.257263	0.338	0.199	1.05098e-24	0.139	SCAMP5	NE-Variant
ENSG00000251629	1.45921e-26	0.314873	0.379	0.24	5.3391e-22	0.139	LINC02241	NE-Variant
ENSG00000100503	3.14038e-48	0.369884	0.422	0.284	1.14904e-43	0.138	NIN	NE-Variant
ENSG00000152154	9.30445e-44	0.26237	0.228	0.09	3.40441e-39	0.138	TMEM178A	NE-Variant
ENSG00000168843	3.1482e-58	0.36908	0.196	0.058	1.15189e-53	0.138	FSTL5	NE-Variant
ENSG00000108830	1.36694e-55	0.312442	0.302	0.165	5.00151e-51	0.137	RND2	NE-Variant
ENSG00000111674	2.0924e-38	0.407098	0.499	0.362	7.65589e-34	0.137	ENO2	NE-Variant
ENSG00000114126	1.93403e-65	0.585508	0.761	0.624	7.07643e-61	0.137	TFDP2	NE-Variant
ENSG00000132872	8.09623e-56	0.255593	0.147	0.01	2.96233e-51	0.137	SYT4	NE-Variant
ENSG00000116141	2.90457e-29	0.32327	0.421	0.285	1.06275e-24	0.136	MARK1	NE-Variant
ENSG00000145569	6.81502e-26	0.251916	0.194	0.058	2.49355e-21	0.136	OTULINL	NE-Variant
ENSG00000163590	1.63433e-58	0.588785	0.67	0.534	5.97986e-54	0.136	PPM1L	NE-Variant
ENSG00000177103	4.12851e-52	0.303921	0.151	0.015	1.51058e-47	0.136	DSCAML1	NE-Variant
ENSG00000100592	2.2229e-28	0.424687	0.569	0.434	8.13337e-24	0.135	DAAM1	NE-Variant
ENSG00000156650	6.454e-46	0.458604	0.54	0.405	2.36145e-41	0.135	KAT6B	NE-Variant
ENSG00000130643	9.01044e-40	0.320595	0.175	0.041	3.29683e-35	0.134	CALY	NE-Variant
ENSG00000008197	8.58025e-37	0.270132	0.21	0.077	3.13943e-32	0.133	TFAP2D	NE-Variant
ENSG00000109046	4.07555e-17	0.387439	0.664	0.531	1.4912e-12	0.133	WSB1	NE-Variant
ENSG00000129355	2.50405e-27	0.292062	0.193	0.06	9.16206e-23	0.133	CDKN2D	NE-Variant
ENSG00000138760	6.31777e-32	0.383371	0.544	0.411	2.31161e-27	0.133	SCARB2	NE-Variant
ENSG00000153253	1.68396e-49	0.27903	0.145	0.013	6.16145e-45	0.132	SCN3A	NE-Variant
ENSG00000225930	2.81348e-37	0.254212	0.239	0.107	1.02942e-32	0.132	LINC02249	NE-Variant
ENSG00000054267	3.75799e-23	0.369312	0.709	0.579	1.37501e-18	0.13	ARID4B	NE-Variant
ENSG00000180773	2.82632e-23	0.337776	0.487	0.357	1.03412e-18	0.13	SLC36A4	NE-Variant
ENSG00000181722	8.55024e-23	0.482454	0.501	0.371	3.12845e-18	0.13	ZBTB20	NE-Variant
ENSG00000263551	9.5007e-58	0.498257	0.393	0.263	3.47621e-53	0.13	AP000829.1	NE-Variant
ENSG00000137968	4.02487e-24	0.347333	0.338	0.209	1.47266e-19	0.129	SLC44A5	NE-Variant
ENSG00000172260	2.08268e-25	0.364806	0.299	0.17	7.62033e-21	0.129	NEGR1	NE-Variant
ENSG00000182050	8.09106e-42	0.415749	0.15	0.021	2.96044e-37	0.129	MGAT4C	NE-Variant
ENSG00000205336	1.46286e-27	0.260076	0.242	0.113	5.35246e-23	0.129	ADGRG1	NE-Variant
ENSG00000077254	5.42663e-22	0.282174	0.411	0.283	1.98555e-17	0.128	USP33	NE-Variant
ENSG00000092421	1.91682e-31	0.308307	0.373	0.245	7.01346e-27	0.128	SEMA6A	NE-Variant
ENSG00000137285	7.57572e-106	0.895009	0.916	0.788	2.77188e-101	0.128	TUBB2B	NE-Variant
ENSG00000141682	5.74794e-10	0.255871	0.446	0.318	2.10311e-05	0.128	PMAIP1	NE-Variant
ENSG00000175161	3.92614e-35	0.495143	0.383	0.255	1.43654e-30	0.128	CADM2	NE-Variant
ENSG00000267586	1.00276e-44	0.438871	0.157	0.029	3.66902e-40	0.128	LINC00907	NE-Variant
ENSG00000176840	1.84161e-58	0.669185	0.137	0.01	6.73826e-54	0.127	MIR7-3HG	NE-Variant
ENSG00000185737	5.50405e-38	0.392056	0.309	0.182	2.01388e-33	0.127	NRG3	NE-Variant
ENSG00000180530	2.63995e-34	0.399051	0.463	0.337	9.65933e-30	0.126	NRIP1	NE-Variant
ENSG00000184144	4.08015e-69	0.315243	0.131	0.005	1.49289e-64	0.126	CNTN2	NE-Variant
ENSG00000054356	3.87927e-50	0.281679	0.143	0.018	1.41938e-45	0.125	PTPRN	NE-Variant
ENSG00000101846	3.51341e-25	0.301409	0.365	0.24	1.28552e-20	0.125	STS	NE-Variant
ENSG00000139970	1.80388e-40	0.257063	0.158	0.033	6.60021e-36	0.125	RTN1	NE-Variant
ENSG00000171033	1.88144e-46	0.389103	0.354	0.229	6.88401e-42	0.125	PKIA	NE-Variant
ENSG00000184611	4.69579e-41	0.342476	0.141	0.016	1.71814e-36	0.125	KCNH7	NE-Variant
ENSG00000131711	2.35873e-210	1.02264	0.936	0.812	8.63036e-206	0.124	MAP1B	NE-Variant
ENSG00000148798	7.89222e-36	0.289175	0.404	0.28	2.88768e-31	0.124	INA	NE-Variant
ENSG00000170624	7.61523e-51	0.505457	0.271	0.147	2.78634e-46	0.124	SGCD	NE-Variant
ENSG00000151914	1.94667e-38	0.515837	0.75	0.627	7.12267e-34	0.123	DST	NE-Variant
ENSG00000123636	2.69303e-21	0.374003	0.466	0.344	9.85352e-17	0.122	BAZ2B	NE-Variant
ENSG00000182985	4.09084e-40	0.48585	0.615	0.493	1.4968e-35	0.122	CADM1	NE-Variant
ENSG00000214530	3.88768e-16	0.391426	0.232	0.11	1.42246e-11	0.122	STARD10	NE-Variant
ENSG00000235493	1.07066e-26	0.353922	0.386	0.264	3.91743e-22	0.122	LINC01967	NE-Variant
ENSG00000114423	2.24797e-29	0.354818	0.376	0.255	8.2251e-25	0.121	CBLB	NE-Variant
ENSG00000115756	9.6398e-23	0.252764	0.333	0.212	3.52711e-18	0.121	HPCAL1	NE-Variant
ENSG00000151150	9.84922e-71	0.553341	0.368	0.247	3.60373e-66	0.121	ANK3	NE-Variant
ENSG00000107518	4.00079e-31	0.38413	0.463	0.343	1.46385e-26	0.12	ATRNL1	NE-Variant
ENSG00000164853	8.73689e-78	0.35848	0.123	0.003	3.19674e-73	0.12	UNCX	NE-Variant
ENSG00000175175	1.81274e-41	0.386863	0.625	0.505	6.63263e-37	0.12	PPM1E	NE-Variant
ENSG00000048740	3.4869e-25	0.392546	0.662	0.543	1.27582e-20	0.119	CELF2	NE-Variant
ENSG00000154553	6.19405e-31	0.284905	0.256	0.137	2.26634e-26	0.119	PDLIM3	NE-Variant
ENSG00000157064	1.63146e-47	0.254786	0.133	0.014	5.96934e-43	0.119	NMNAT2	NE-Variant
ENSG00000160180	1.92382e-12	1.05778	0.193	0.074	7.03907e-08	0.119	TFF3	NE-Variant
ENSG00000056487	3.79153e-28	0.269878	0.466	0.348	1.38728e-23	0.118	PHF21B	NE-Variant
ENSG00000107643	1.1686e-26	0.35718	0.534	0.416	4.2758e-22	0.118	MAPK8	NE-Variant
ENSG00000054654	9.0062e-47	0.467563	0.508	0.391	3.29528e-42	0.117	SYNE2	NE-Variant
ENSG00000101210	2.95369e-54	0.357859	0.246	0.129	1.08073e-49	0.117	EEF1A2	NE-Variant
ENSG00000157570	1.15426e-51	0.307724	0.193	0.076	4.22333e-47	0.117	TSPAN18	NE-Variant
ENSG00000162687	1.26104e-24	0.34272	0.531	0.414	4.61404e-20	0.117	KCNT2	NE-Variant
ENSG00000174482	1.41686e-22	0.325153	0.206	0.089	5.18415e-18	0.117	LINGO2	NE-Variant
ENSG00000198963	7.92075e-64	0.399764	0.329	0.212	2.89812e-59	0.117	RORB	NE-Variant
ENSG00000034713	8.23278e-56	0.459133	0.741	0.625	3.01229e-51	0.116	GABARAPL2	NE-Variant
ENSG00000054523	2.36904e-34	0.395259	0.678	0.562	8.66809e-30	0.116	KIF1B	NE-Variant
ENSG00000091129	5.41406e-24	0.385627	0.404	0.288	1.98095e-19	0.116	NRCAM	NE-Variant
ENSG00000170035	2.1879e-41	0.396695	0.702	0.586	8.00532e-37	0.116	UBE2E3	NE-Variant
ENSG00000220205	1.19573e-55	0.483489	0.659	0.543	4.37505e-51	0.116	VAMP2	NE-Variant
ENSG00000211445	2.55828e-47	0.479901	0.133	0.018	9.36048e-43	0.115	GPX3	NE-Variant
ENSG00000213047	2.82235e-25	0.254847	0.274	0.159	1.03267e-20	0.115	DENND1B	NE-Variant
ENSG00000021645	5.85281e-14	0.323873	0.29	0.176	2.14149e-09	0.114	NRXN3	NE-Variant
ENSG00000118271	1.41696e-38	1.36158	0.148	0.034	5.1845e-34	0.114	TTR	NE-Variant
ENSG00000148908	3.16849e-84	0.528153	0.618	0.504	1.15932e-79	0.114	RGS10	NE-Variant
ENSG00000288087	1.03215e-34	0.530131	0.134	0.02	3.77654e-30	0.114	AC112770.1	NE-Variant
ENSG00000114796	7.6893e-16	0.267045	0.327	0.214	2.81344e-11	0.113	KLHL24	NE-Variant
ENSG00000121769	8.63462e-46	0.477511	0.185	0.072	3.15932e-41	0.113	FABP3	NE-Variant
ENSG00000121966	1.71521e-20	0.263962	0.263	0.15	6.27578e-16	0.113	CXCR4	NE-Variant
ENSG00000145730	1.43963e-57	0.65474	0.66	0.547	5.26746e-53	0.113	PAM	NE-Variant
ENSG00000067798	6.37095e-37	0.592036	0.19	0.078	2.33107e-32	0.112	NAV3	NE-Variant
ENSG00000071054	2.84057e-51	0.523748	0.649	0.537	1.03934e-46	0.112	MAP4K4	NE-Variant
ENSG00000114115	4.92143e-19	0.424304	0.312	0.2	1.8007e-14	0.112	RBP1	NE-Variant
ENSG00000144278	2.59867e-27	0.306278	0.72	0.608	9.50827e-23	0.112	GALNT13	NE-Variant
ENSG00000152402	3.69556e-33	0.310265	0.324	0.212	1.35217e-28	0.112	GUCY1A2	NE-Variant
ENSG00000243449	1.4122e-56	0.631286	0.701	0.589	5.16709e-52	0.112	C4orf48	NE-Variant
ENSG00000259240	4.49042e-30	0.358788	0.449	0.337	1.643e-25	0.112	MIR4713HG	NE-Variant
ENSG00000003147	9.59421e-12	0.258067	0.208	0.097	3.51042e-07	0.111	ICA1	NE-Variant
ENSG00000277443	2.4999e-86	0.742592	0.888	0.777	9.14689e-82	0.111	MARCKS	NE-Variant
ENSG00000104381	1.02133e-32	0.280782	0.413	0.303	3.73693e-28	0.11	GDAP1	NE-Variant
ENSG00000130522	4.85992e-44	0.472349	0.808	0.698	1.7782e-39	0.11	JUND	NE-Variant
ENSG00000139116	1.7315e-61	0.426586	0.642	0.532	6.3354e-57	0.11	KIF21A	NE-Variant
ENSG00000162490	4.07649e-48	0.270541	0.129	0.019	1.49155e-43	0.11	DRAXIN	NE-Variant
ENSG00000173064	2.01997e-20	0.288141	0.413	0.303	7.39085e-16	0.11	HECTD4	NE-Variant
ENSG00000187079	1.48608e-38	0.460909	0.621	0.511	5.43741e-34	0.11	TEAD1	NE-Variant
ENSG00000233041	8.67138e-44	0.379048	0.119	0.009	3.17277e-39	0.11	PHGR1	NE-Variant
ENSG00000103460	9.44476e-34	0.396447	0.477	0.368	3.45574e-29	0.109	TOX3	NE-Variant
ENSG00000104177	2.25573e-35	0.325774	0.494	0.385	8.2535e-31	0.109	MYEF2	NE-Variant
ENSG00000280870	3.82474e-17	0.322263	0.283	0.174	1.39943e-12	0.109	AC233296.1	NE-Variant
ENSG00000104964	1.49169e-22	0.326925	0.512	0.404	5.45793e-18	0.108	TLE5	NE-Variant
ENSG00000078114	2.62437e-12	0.327842	0.179	0.072	9.60229e-08	0.107	NEBL	NE-Variant
ENSG00000100354	2.69334e-14	0.281376	0.625	0.518	9.85467e-10	0.107	TNRC6B	NE-Variant
ENSG00000164305	5.03629e-48	0.339952	0.276	0.169	1.84273e-43	0.107	CASP3	NE-Variant
ENSG00000070961	3.34061e-58	0.448915	0.703	0.597	1.22229e-53	0.106	ATP2B1	NE-Variant
ENSG00000105402	1.76523e-20	0.262114	0.42	0.314	6.4588e-16	0.106	NAPA	NE-Variant
ENSG00000186318	6.19015e-28	0.250136	0.327	0.222	2.26492e-23	0.105	BACE1	NE-Variant
ENSG00000214338	6.60155e-26	0.261798	0.362	0.257	2.41544e-21	0.105	SOGA3	NE-Variant
ENSG00000283674	2.88858e-21	0.312987	0.284	0.179	1.0569e-16	0.105	AC068587.4	NE-Variant
ENSG00000145362	4.23555e-32	0.377316	0.722	0.618	1.54975e-27	0.104	ANK2	NE-Variant
ENSG00000186474	1.09477e-31	0.421679	0.117	0.013	4.00567e-27	0.104	KLK12	NE-Variant
ENSG00000134369	4.16812e-25	0.295496	0.25	0.147	1.52507e-20	0.103	NAV1	NE-Variant
ENSG00000182054	1.10036e-36	0.502028	0.737	0.634	4.0261e-32	0.103	IDH2	NE-Variant
ENSG00000112379	3.14982e-20	0.44597	0.227	0.125	1.15249e-15	0.102	ARFGEF3	NE-Variant
ENSG00000163625	1.95351e-22	0.309966	0.462	0.36	7.14771e-18	0.102	WDFY3	NE-Variant
ENSG00000259692	7.88103e-31	0.466109	0.761	0.659	2.88359e-26	0.102	AC104041.1	NE-Variant
ENSG00000117020	3.15508e-41	0.516476	0.676	0.575	1.15441e-36	0.101	AKT3	NE-Variant
ENSG00000125354	1.06389e-51	0.351108	0.442	0.341	3.89267e-47	0.101	SEPTIN6	NE-Variant
ENSG00000127603	9.91472e-20	0.381208	0.69	0.589	3.6277e-15	0.101	MACF1	NE-Variant
ENSG00000205268	3.07928e-23	0.286054	0.456	0.355	1.12668e-18	0.101	PDE7A	NE-Variant
ENSG00000099954	8.20981e-46	0.437208	0.592	0.492	3.00389e-41	0.1	CECR2	NE-Variant
ENSG00000273079	1.95997e-31	0.254126	0.129	0.029	7.17134e-27	0.1	GRIN2B	NE-Variant
ENSG00000109381	5.60124e-25	0.331106	0.536	0.437	2.04944e-20	0.099	ELF2	NE-Variant
ENSG00000130222	7.07849e-16	0.339011	0.278	0.179	2.58995e-11	0.099	GADD45G	NE-Variant
ENSG00000133639	4.07532e-22	0.587556	0.743	0.644	1.49112e-17	0.099	BTG1	NE-Variant
ENSG00000159023	1.47752e-60	0.478518	0.61	0.511	5.40608e-56	0.099	EPB41	NE-Variant
ENSG00000204525	2.15504e-11	0.519251	0.214	0.115	7.88507e-07	0.099	HLA-C	NE-Variant
ENSG00000163939	8.20106e-38	0.36325	0.669	0.571	3.00069e-33	0.098	PBRM1	NE-Variant
ENSG00000075539	4.26573e-19	0.288586	0.52	0.422	1.56079e-14	0.098	FRYL	NE-Variant
ENSG00000158987	2.35339e-26	0.337229	0.61	0.512	8.6108e-22	0.098	RAPGEF6	NE-Variant
ENSG00000164176	2.79774e-19	0.253002	0.164	0.066	1.02366e-14	0.098	EDIL3	NE-Variant
ENSG00000082701	4.4877e-14	0.250048	0.545	0.448	1.642e-09	0.097	GSK3B	NE-Variant
ENSG00000124766	2.09134e-60	0.439155	0.845	0.748	7.65202e-56	0.097	SOX4	NE-Variant
ENSG00000163499	1.19086e-48	0.660061	0.101	0.004	4.35722e-44	0.097	CRYBA2	NE-Variant
ENSG00000250298	2.75308e-20	0.343191	0.196	0.099	1.00732e-15	0.097	GIMD1	NE-Variant
ENSG00000171316	9.31135e-57	0.479299	0.687	0.591	3.40693e-52	0.096	CHD7	NE-Variant
ENSG00000005483	2.12975e-24	0.375216	0.638	0.542	7.79255e-20	0.096	KMT2E	NE-Variant
ENSG00000112182	2.23926e-10	0.318644	0.348	0.252	8.19322e-06	0.096	BACH2	NE-Variant
ENSG00000138801	5.33139e-55	0.361095	0.515	0.419	1.9507e-50	0.096	PAPSS1	NE-Variant
ENSG00000164684	5.48154e-41	0.440858	0.441	0.345	2.00564e-36	0.096	ZNF704	NE-Variant
ENSG00000184905	8.36324e-36	0.255986	0.11	0.014	3.06003e-31	0.096	TCEAL2	NE-Variant
ENSG00000137872	1.8947e-48	0.593762	0.667	0.572	6.93254e-44	0.095	SEMA6D	NE-Variant
ENSG00000171130	2.04141e-22	0.315966	0.445	0.35	7.4693e-18	0.095	ATP6V0E2	NE-Variant
ENSG00000206052	7.61472e-33	0.362864	0.276	0.181	2.78615e-28	0.095	DOK6	NE-Variant
ENSG00000120693	2.29862e-46	0.406461	0.373	0.279	8.41044e-42	0.094	SMAD9	NE-Variant
ENSG00000131149	9.31025e-19	0.293348	0.505	0.411	3.40653e-14	0.094	GSE1	NE-Variant
ENSG00000184489	1.23696e-08	0.256956	0.199	0.105	0.000452591	0.094	PTP4A3	NE-Variant
ENSG00000117519	1.28723e-29	0.271729	0.49	0.397	4.70984e-25	0.093	CNN3	NE-Variant
ENSG00000126214	5.256e-31	0.310133	0.481	0.388	1.92312e-26	0.093	KLC1	NE-Variant
ENSG00000139352	8.79322e-05	0.555797	0.243	0.15	1	0.093	ASCL1	NE-Variant
ENSG00000168528	0.000109114	0.262474	0.19	0.097	1	0.093	SERINC2	NE-Variant
ENSG00000178177	1.51397e-37	0.38847	0.587	0.494	5.53948e-33	0.093	LCORL	NE-Variant
ENSG00000198832	3.42103e-31	0.343014	0.208	0.115	1.25172e-26	0.093	SELENOM	NE-Variant
ENSG00000145247	3.80668e-06	0.26667	0.603	0.511	0.139283	0.092	OCIAD2	NE-Variant
ENSG00000170871	1.47514e-14	0.251156	0.435	0.343	5.39738e-10	0.092	KIAA0232	NE-Variant
ENSG00000183780	4.45086e-44	0.461167	0.148	0.056	1.62852e-39	0.092	SLC35F3	NE-Variant
ENSG00000198682	3.24735e-27	0.317866	0.155	0.063	1.18817e-22	0.092	PAPSS2	NE-Variant
ENSG00000233237	7.22605e-27	0.41338	0.627	0.535	2.64394e-22	0.092	LINC00472	NE-Variant
ENSG00000101443	0.000254729	0.256073	0.213	0.122	1	0.091	WFDC2	NE-Variant
ENSG00000163171	1.27495e-09	0.26976	0.25	0.159	4.66491e-05	0.091	CDC42EP3	NE-Variant
ENSG00000196233	2.85214e-15	0.295173	0.501	0.41	1.04357e-10	0.091	LCOR	NE-Variant
ENSG00000079102	1.63237e-29	0.369115	0.509	0.419	5.97267e-25	0.09	RUNX1T1	NE-Variant
ENSG00000130396	7.05149e-28	0.302925	0.594	0.504	2.58007e-23	0.09	AFDN	NE-Variant
ENSG00000136267	4.3337e-26	0.445278	0.303	0.213	1.58566e-21	0.09	DGKB	NE-Variant
ENSG00000173267	5.52226e-47	0.275442	0.134	0.044	2.02054e-42	0.09	SNCG	NE-Variant
ENSG00000196935	2.05218e-19	0.263669	0.364	0.274	7.50872e-15	0.09	SRGAP1	NE-Variant
ENSG00000145495	2.90207e-27	0.365163	0.652	0.563	1.06184e-22	0.089	MARCH6	NE-Variant
ENSG00000110987	2.01168e-53	0.376745	0.576	0.487	7.36054e-49	0.089	BCL7A	NE-Variant
ENSG00000119782	3.88963e-50	0.582101	0.263	0.174	1.42318e-45	0.089	FKBP1B	NE-Variant
ENSG00000152492	2.84846e-30	0.270479	0.4	0.311	1.04222e-25	0.089	CCDC50	NE-Variant
ENSG00000164292	2.78053e-38	0.360691	0.759	0.67	1.01737e-33	0.089	RHOBTB3	NE-Variant
ENSG00000204442	5.52327e-19	0.252602	0.185	0.096	2.02091e-14	0.089	FAM155A	NE-Variant
ENSG00000157985	1.49675e-42	0.451726	0.81	0.722	5.47648e-38	0.088	AGAP1	NE-Variant
ENSG00000135540	1.47399e-15	0.25621	0.48	0.392	5.39318e-11	0.088	NHSL1	NE-Variant
ENSG00000186566	3.71357e-18	0.295984	0.613	0.525	1.35876e-13	0.088	GPATCH8	NE-Variant
ENSG00000245750	4.39969e-09	0.278627	0.138	0.05	0.00016098	0.088	DRAIC	NE-Variant
ENSG00000122641	2.92737e-24	0.275253	0.103	0.016	1.07109e-19	0.087	INHBA	NE-Variant
ENSG00000138653	3.13099e-28	0.295762	0.221	0.134	1.1456e-23	0.087	NDST4	NE-Variant
ENSG00000233098	1.62906e-20	0.41144	0.747	0.66	5.96058e-16	0.087	CCDC144NL-AS1	NE-Variant
ENSG00000053108	1.89543e-25	0.357172	0.373	0.287	6.93518e-21	0.086	FSTL4	NE-Variant
ENSG00000106462	6.17217e-46	0.475762	0.61	0.524	2.25833e-41	0.086	EZH2	NE-Variant
ENSG00000186231	3.88764e-29	0.258027	0.14	0.054	1.42245e-24	0.086	KLHL32	NE-Variant
ENSG00000008196	7.40062e-38	0.254787	0.137	0.052	2.70781e-33	0.085	TFAP2B	NE-Variant
ENSG00000067141	6.76694e-31	0.27758	0.316	0.231	2.47596e-26	0.085	NEO1	NE-Variant
ENSG00000084628	1.76423e-37	0.305385	0.443	0.358	6.45513e-33	0.085	NKAIN1	NE-Variant
ENSG00000107771	2.8731e-15	0.279534	0.432	0.347	1.05124e-10	0.085	CCSER2	NE-Variant
ENSG00000147408	2.59129e-28	0.276756	0.123	0.038	9.48126e-24	0.085	CSGALNACT1	NE-Variant
ENSG00000159388	1.13814e-05	0.252847	0.298	0.213	0.416436	0.085	BTG2	NE-Variant
ENSG00000286797	1.21957e-23	0.266168	0.336	0.251	4.46228e-19	0.085	AC009315.1	NE-Variant
ENSG00000114784	7.015e-43	0.410214	0.744	0.66	2.56672e-38	0.084	EIF1B	NE-Variant
ENSG00000170296	2.1441e-55	0.676652	0.912	0.829	7.84505e-51	0.083	GABARAP	NE-Variant
ENSG00000157764	5.9405e-14	0.296186	0.523	0.44	2.17357e-09	0.083	BRAF	NE-Variant
ENSG00000250616	1.13146e-12	0.259807	0.394	0.313	4.1399e-08	0.081	AC012645.1	NE-Variant
ENSG00000053254	1.11048e-13	0.278151	0.55	0.47	4.06315e-09	0.08	FOXN3	NE-Variant
ENSG00000033800	2.16883e-19	0.254539	0.471	0.391	7.93553e-15	0.08	PIAS1	NE-Variant
ENSG00000104760	1.75318e-13	0.417505	0.101	0.021	6.4147e-09	0.08	FGL1	NE-Variant
ENSG00000109339	2.43362e-17	0.257098	0.29	0.211	8.90436e-13	0.079	MAPK10	NE-Variant
ENSG00000166503	8.59889e-26	0.277002	0.538	0.459	3.14625e-21	0.079	HDGFL3	NE-Variant
ENSG00000184226	2.84544e-18	0.307628	0.186	0.107	1.04112e-13	0.079	PCDH9	NE-Variant
ENSG00000168243	3.45877e-38	0.42362	0.669	0.591	1.26553e-33	0.078	GNG4	NE-Variant
ENSG00000082397	6.75505e-06	0.252497	0.327	0.249	0.247161	0.078	EPB41L3	NE-Variant
ENSG00000105426	9.19404e-38	0.34665	0.519	0.441	3.36401e-33	0.078	PTPRS	NE-Variant
ENSG00000135097	7.07505e-31	0.254578	0.406	0.328	2.58869e-26	0.078	MSI1	NE-Variant
ENSG00000198168	3.71411e-20	0.270047	0.382	0.304	1.35895e-15	0.078	SVIP	NE-Variant
ENSG00000272888	2.04494e-30	0.3142	0.643	0.566	7.48224e-26	0.077	LINC01578	NE-Variant
ENSG00000101752	4.79837e-34	0.32836	0.613	0.536	1.75568e-29	0.077	MIB1	NE-Variant
ENSG00000105223	1.87932e-33	0.560008	0.564	0.487	6.87624e-29	0.077	PLD3	NE-Variant
ENSG00000115461	0.00808361	0.500822	0.276	0.199	1	0.077	IGFBP5	NE-Variant
ENSG00000138081	5.67564e-15	0.290888	0.599	0.522	2.07666e-10	0.077	FBXO11	NE-Variant
ENSG00000145996	3.78694e-50	0.58026	0.74	0.663	1.3856e-45	0.077	CDKAL1	NE-Variant
ENSG00000147548	4.74082e-36	0.358395	0.734	0.657	1.73462e-31	0.077	NSD3	NE-Variant
ENSG00000162704	3.54791e-43	0.378097	0.69	0.613	1.29814e-38	0.077	ARPC5	NE-Variant
ENSG00000174469	6.87217e-46	0.415489	0.213	0.136	2.51446e-41	0.077	CNTNAP2	NE-Variant
ENSG00000189229	1.94618e-42	0.541553	0.72	0.643	7.12088e-38	0.077	AC069277.1	NE-Variant
ENSG00000116667	3.65982e-25	0.272217	0.428	0.352	1.33909e-20	0.076	C1orf21	NE-Variant
ENSG00000126733	5.76455e-09	0.342116	0.59	0.514	0.000210919	0.076	DACH2	NE-Variant
ENSG00000137942	1.22137e-23	0.311691	0.502	0.426	4.46889e-19	0.076	FNBP1L	NE-Variant
ENSG00000143702	4.28763e-40	0.328451	0.526	0.45	1.5688e-35	0.076	CEP170	NE-Variant
ENSG00000183098	1.19194e-58	0.649836	0.862	0.786	4.36119e-54	0.076	GPC6	NE-Variant
ENSG00000241697	3.13143e-52	0.404332	0.497	0.421	1.14576e-47	0.076	TMEFF1	NE-Variant
ENSG00000196782	5.87889e-28	0.429181	0.715	0.641	2.15103e-23	0.074	MAML3	NE-Variant
ENSG00000105993	3.05072e-22	0.298366	0.677	0.604	1.11623e-17	0.073	DNAJB6	NE-Variant
ENSG00000096092	4.58471e-21	0.324143	0.243	0.17	1.6775e-16	0.073	TMEM14A	NE-Variant
ENSG00000183049	1.04794e-14	0.348528	0.596	0.523	3.83431e-10	0.073	CAMK1D	NE-Variant
ENSG00000074054	4.93215e-25	0.28973	0.505	0.433	1.80462e-20	0.072	CLASP1	NE-Variant
ENSG00000151322	8.31304e-14	0.334276	0.466	0.394	3.04166e-09	0.072	NPAS3	NE-Variant
ENSG00000166233	2.70896e-12	0.292386	0.664	0.593	9.91181e-08	0.071	ARIH1	NE-Variant
ENSG00000198648	1.05373e-19	0.256449	0.498	0.427	3.85549e-15	0.071	STK39	NE-Variant
ENSG00000007168	1.30241e-17	0.263396	0.643	0.573	4.76539e-13	0.07	PAFAH1B1	NE-Variant
ENSG00000164548	5.70467e-12	0.310384	0.642	0.572	2.08728e-07	0.07	TRA2A	NE-Variant
ENSG00000008294	1.07534e-20	0.264704	0.611	0.541	3.93455e-16	0.07	SPAG9	NE-Variant
ENSG00000171159	9.27904e-57	0.486977	0.758	0.689	3.39511e-52	0.069	C9orf16	NE-Variant
ENSG00000110680	1.30657e-08	0.961502	0.109	0.04	0.00047806	0.069	CALCA	NE-Variant
ENSG00000137710	9.02017e-32	0.315636	0.745	0.676	3.30039e-27	0.069	RDX	NE-Variant
ENSG00000146243	9.016e-27	0.251546	0.431	0.362	3.29886e-22	0.069	IRAK1BP1	NE-Variant
ENSG00000160888	0.00225489	0.304555	0.485	0.416	1	0.069	IER2	NE-Variant
ENSG00000230590	2.70691e-25	0.397187	0.836	0.767	9.90432e-21	0.069	FTX	NE-Variant
ENSG00000105254	8.70916e-38	0.357984	0.768	0.7	3.1866e-33	0.068	TBCB	NE-Variant
ENSG00000148468	1.34097e-28	0.306363	0.516	0.448	4.90648e-24	0.068	FAM171A1	NE-Variant
ENSG00000154556	1.52559e-30	0.417982	0.331	0.263	5.58197e-26	0.068	SORBS2	NE-Variant
ENSG00000175806	1.65892e-21	0.496011	0.303	0.235	6.06984e-17	0.068	MSRA	NE-Variant
ENSG00000198815	4.43412e-13	0.26318	0.627	0.559	1.6224e-08	0.068	FOXJ3	NE-Variant
ENSG00000126709	0.000391083	0.367434	0.131	0.064	1	0.067	IFI6	NE-Variant
ENSG00000154640	3.40024e-34	0.355806	0.618	0.551	1.24411e-29	0.067	BTG3	NE-Variant
ENSG00000166833	4.40192e-22	0.422857	0.441	0.374	1.61062e-17	0.067	NAV2	NE-Variant
ENSG00000144485	4.82291e-100	0.989907	0.929	0.863	1.76465e-95	0.066	HES6	NE-Variant
ENSG00000235162	1.70952e-53	0.786267	0.45	0.384	6.25496e-49	0.066	C12orf75	NE-Variant
ENSG00000112541	1.50473e-12	0.293607	0.352	0.287	5.50564e-08	0.065	PDE10A	NE-Variant
ENSG00000151320	4.5518e-28	0.268913	0.225	0.16	1.66546e-23	0.065	AKAP6	NE-Variant
ENSG00000128585	6.40565e-21	0.298686	0.558	0.494	2.34376e-16	0.064	MKLN1	NE-Variant
ENSG00000167081	1.64903e-19	0.286675	0.547	0.483	6.03364e-15	0.064	PBX3	NE-Variant
ENSG00000141580	3.18848e-08	0.261589	0.516	0.452	0.00116663	0.064	WDR45B	NE-Variant
ENSG00000175203	4.81604e-27	0.295417	0.708	0.644	1.76214e-22	0.064	DCTN2	NE-Variant
ENSG00000179104	1.19328e-26	0.414367	0.499	0.435	4.3661e-22	0.064	TMTC2	NE-Variant
ENSG00000187244	0.000557433	0.2551	0.173	0.109	1	0.064	BCAM	NE-Variant
ENSG00000197321	6.23763e-13	0.279709	0.429	0.366	2.28229e-08	0.063	SVIL	NE-Variant
ENSG00000198597	7.36557e-17	0.291049	0.278	0.215	2.69499e-12	0.063	ZNF536	NE-Variant
ENSG00000070831	1.50506e-29	0.355353	0.764	0.702	5.50688e-25	0.062	CDC42	NE-Variant
ENSG00000100154	7.22858e-23	0.274415	0.779	0.717	2.64487e-18	0.062	TTC28	NE-Variant
ENSG00000002330	2.01712e-17	0.268877	0.453	0.391	7.38044e-13	0.062	BAD	NE-Variant
ENSG00000105968	3.27353e-29	0.359159	0.747	0.685	1.19775e-24	0.062	H2AFV	NE-Variant
ENSG00000188994	4.088e-31	0.36407	0.705	0.643	1.49576e-26	0.062	ZNF292	NE-Variant
ENSG00000267313	2.55198e-21	0.316925	0.621	0.559	9.33743e-17	0.062	AC021504.1	NE-Variant
ENSG00000153944	1.20955e-31	0.452687	0.776	0.715	4.42563e-27	0.061	MSI2	NE-Variant
ENSG00000182552	3.69725e-38	0.253687	0.534	0.473	1.35279e-33	0.061	RWDD4	NE-Variant
ENSG00000134769	2.42035e-16	0.512182	0.435	0.374	8.85581e-12	0.061	DTNA	NE-Variant
ENSG00000135821	3.72564e-27	0.280764	0.603	0.542	1.36318e-22	0.061	GLUL	NE-Variant
ENSG00000114861	9.88488e-08	0.275822	0.748	0.688	0.00361678	0.06	FOXP1	NE-Variant
ENSG00000124486	6.65847e-17	0.288896	0.653	0.593	2.43627e-12	0.06	USP9X	NE-Variant
ENSG00000213923	4.36689e-38	0.293825	0.656	0.596	1.5978e-33	0.06	CSNK1E	NE-Variant
ENSG00000055609	2.51629e-13	0.260088	0.587	0.527	9.20684e-09	0.06	KMT2C	NE-Variant
ENSG00000073803	1.08399e-12	0.281744	0.578	0.518	3.9662e-08	0.06	MAP3K13	NE-Variant
ENSG00000100505	8.67893e-31	0.255091	0.481	0.421	3.17553e-26	0.06	TRIM9	NE-Variant
ENSG00000145687	1.53219e-19	0.336662	0.681	0.622	5.60614e-15	0.059	SSBP2	NE-Variant
ENSG00000234745	5.15189e-10	0.65019	0.234	0.175	1.88502e-05	0.059	HLA-B	NE-Variant
ENSG00000170540	3.90982e-08	0.265241	0.62	0.561	0.00143056	0.059	ARL6IP1	NE-Variant
ENSG00000116209	4.04161e-15	0.32894	0.568	0.511	1.47879e-10	0.057	TMEM59	NE-Variant
ENSG00000165671	1.91235e-30	0.283089	0.607	0.55	6.9971e-26	0.057	NSD1	NE-Variant
ENSG00000177879	4.4017e-13	0.263497	0.582	0.525	1.61054e-08	0.057	AP3S1	NE-Variant
ENSG00000196507	1.01433e-30	0.333866	0.464	0.408	3.71134e-26	0.056	TCEAL3	NE-Variant
ENSG00000213639	2.68675e-13	0.25405	0.589	0.533	9.83057e-09	0.056	PPP1CB	NE-Variant
ENSG00000164442	2.29207e-05	0.256633	0.225	0.17	0.838646	0.055	CITED2	NE-Variant
ENSG00000148143	4.8522e-36	0.307992	0.414	0.36	1.77537e-31	0.054	ZNF462	NE-Variant
ENSG00000080298	5.608e-14	0.254208	0.583	0.529	2.05191e-09	0.054	RFX3	NE-Variant
ENSG00000120727	2.79741e-20	0.293822	0.726	0.672	1.02354e-15	0.054	PAIP2	NE-Variant
ENSG00000125971	1.24147e-22	0.299192	0.706	0.652	4.54241e-18	0.054	DYNLRB1	NE-Variant
ENSG00000128245	2.08905e-27	0.349634	0.764	0.711	7.64362e-23	0.053	YWHAH	NE-Variant
ENSG00000164190	6.81943e-22	0.291055	0.639	0.586	2.49516e-17	0.053	NIPBL	NE-Variant
ENSG00000171988	5.94302e-22	0.347819	0.836	0.783	2.17449e-17	0.053	JMJD1C	NE-Variant
ENSG00000173575	6.79699e-11	0.285715	0.599	0.546	2.48695e-06	0.053	CHD2	NE-Variant
ENSG00000120658	2.65794e-21	0.31235	0.615	0.563	9.72512e-17	0.052	ENOX1	NE-Variant
ENSG00000163875	7.62428e-19	0.264235	0.54	0.488	2.78965e-14	0.052	MEAF6	NE-Variant
ENSG00000217128	1.91477e-06	0.272114	0.526	0.474	0.0700597	0.052	FNIP1	NE-Variant
ENSG00000168675	2.87158e-11	0.357544	0.379	0.327	1.05068e-06	0.052	LDLRAD4	NE-Variant
ENSG00000168000	2.18092e-28	0.316285	0.592	0.54	7.97977e-24	0.052	BSCL2	NE-Variant
ENSG00000117569	6.64883e-20	0.286906	0.639	0.589	2.43274e-15	0.05	PTBP2	NE-Variant
ENSG00000167552	2.09188e-124	1.13466	0.919	0.869	7.65396e-120	0.05	TUBA1A	NE-Variant
ENSG00000182287	3.2855e-24	0.260583	0.492	0.442	1.20213e-19	0.05	AP1S2	NE-Variant
ENSG00000182768	1.93525e-21	0.285752	0.671	0.621	7.0809e-17	0.05	NGRN	NE-Variant
ENSG00000183230	6.56855e-07	0.269697	0.263	0.214	0.0240337	0.049	CTNNA3	NE-Variant
ENSG00000101871	1.5867e-22	0.30506	0.369	0.321	5.80557e-18	0.048	MID1	NE-Variant
ENSG00000137312	1.82301e-14	0.25116	0.421	0.373	6.67022e-10	0.048	FLOT1	NE-Variant
ENSG00000152270	1.29375e-27	0.379011	0.631	0.583	4.7337e-23	0.048	PDE3B	NE-Variant
ENSG00000170396	7.20699e-34	0.483385	0.429	0.381	2.63697e-29	0.048	ZNF804A	NE-Variant
ENSG00000115310	1.45912e-24	0.291508	0.881	0.834	5.33878e-20	0.047	RTN4	NE-Variant
ENSG00000102109	5.36237e-90	0.948811	0.284	0.237	1.96204e-85	0.047	PCSK1N	NE-Variant
ENSG00000128989	1.79184e-17	0.286813	0.67	0.624	6.55618e-13	0.046	ARPP19	NE-Variant
ENSG00000198830	2.52218e-47	0.539558	0.966	0.921	9.22839e-43	0.045	HMGN2	NE-Variant
ENSG00000117632	6.51629e-87	0.736679	0.958	0.914	2.38425e-82	0.044	STMN1	NE-Variant
ENSG00000164199	1.88634e-21	0.256986	0.473	0.431	6.90193e-17	0.042	ADGRV1	NE-Variant
ENSG00000113648	2.03596e-36	0.368728	0.853	0.811	7.44937e-32	0.042	H2AFY	NE-Variant
ENSG00000103145	3.68549e-15	0.25648	0.319	0.278	1.34849e-10	0.041	HCFC1R1	NE-Variant
ENSG00000148516	6.32107e-42	0.407803	0.592	0.551	2.31282e-37	0.041	ZEB1	NE-Variant
ENSG00000168214	2.81128e-13	0.265631	0.705	0.664	1.02862e-08	0.041	RBPJ	NE-Variant
ENSG00000113269	3.7391e-28	0.325551	0.71	0.67	1.3681e-23	0.04	RNF130	NE-Variant
ENSG00000122643	1.00779e-16	0.465892	0.688	0.649	3.6874e-12	0.039	NT5C3A	NE-Variant
ENSG00000111678	6.25154e-29	0.400141	0.945	0.907	2.28738e-24	0.038	C12orf57	NE-Variant
ENSG00000082068	6.4583e-18	0.282458	0.673	0.636	2.36303e-13	0.037	WDR70	NE-Variant
ENSG00000049618	2.76602e-16	0.277551	0.724	0.687	1.01206e-11	0.037	ARID1B	NE-Variant
ENSG00000053371	1.02957e-16	0.271904	0.629	0.593	3.76711e-12	0.036	AKR7A2	NE-Variant
ENSG00000196405	2.71082e-22	0.270115	0.604	0.569	9.91861e-18	0.035	EVL	NE-Variant
ENSG00000281566	5.18826e-21	0.260499	0.662	0.627	1.89833e-16	0.035	AL157778.1	NE-Variant
ENSG00000085224	1.04432e-17	0.261516	0.727	0.693	3.82105e-13	0.034	ATRX	NE-Variant
ENSG00000132475	3.36332e-82	0.610699	0.986	0.952	1.2306e-77	0.034	H3F3B	NE-Variant
ENSG00000118058	2.64209e-25	0.271878	0.694	0.66	9.66715e-21	0.034	KMT2A	NE-Variant
ENSG00000127928	4.54378e-16	0.296156	0.503	0.47	1.66252e-11	0.033	GNGT1	NE-Variant
ENSG00000166848	9.52456e-23	0.263131	0.628	0.595	3.48494e-18	0.033	TERF2IP	NE-Variant
ENSG00000264569	1.40756e-13	0.276028	0.683	0.65	5.15012e-09	0.033	DCXR-DT	NE-Variant
ENSG00000109321	5.81837e-06	0.848026	0.11	0.079	0.212888	0.031	AREG	NE-Variant
ENSG00000117906	2.60441e-38	0.314853	0.775	0.744	9.52928e-34	0.031	RCN2	NE-Variant
ENSG00000076554	1.80679e-11	0.252152	0.561	0.531	6.61088e-07	0.03	TPD52	NE-Variant
ENSG00000158321	5.82253e-25	0.413577	0.892	0.863	2.1304e-20	0.029	AUTS2	NE-Variant
ENSG00000166426	9.90688e-33	0.799599	0.144	0.115	3.62483e-28	0.029	CRABP1	NE-Variant
ENSG00000108654	4.33981e-20	0.285789	0.88	0.852	1.58789e-15	0.028	DDX5	NE-Variant
ENSG00000198668	5.99402e-56	0.535874	0.894	0.866	2.19315e-51	0.028	CALM1	NE-Variant
ENSG00000029993	6.24322e-25	0.497396	0.692	0.664	2.28433e-20	0.028	HMGB3	NE-Variant
ENSG00000188529	3.07856e-19	0.270368	0.827	0.799	1.12641e-14	0.028	SRSF10	NE-Variant
ENSG00000119048	1.05637e-17	0.276941	0.669	0.642	3.86515e-13	0.027	UBE2B	NE-Variant
ENSG00000127445	2.19596e-26	0.286336	0.751	0.724	8.03479e-22	0.027	PIN1	NE-Variant
ENSG00000156976	3.06979e-27	0.467211	0.845	0.818	1.12321e-22	0.027	EIF4A2	NE-Variant
ENSG00000104723	1.06383e-22	0.300447	0.65	0.624	3.89246e-18	0.026	TUSC3	NE-Variant
ENSG00000171735	5.00351e-24	0.287994	0.75	0.724	1.83074e-19	0.026	CAMTA1	NE-Variant
ENSG00000141298	4.80183e-11	0.2621	0.572	0.546	1.75694e-06	0.026	SSH2	NE-Variant
ENSG00000100320	8.96017e-20	0.265459	0.726	0.701	3.27844e-15	0.025	RBFOX2	NE-Variant
ENSG00000120885	2.06056e-29	0.259474	0.267	0.242	7.53939e-25	0.025	CLU	NE-Variant
ENSG00000149485	7.48469e-29	0.262809	0.706	0.681	2.73857e-24	0.025	FADS1	NE-Variant
ENSG00000137267	1.19423e-22	0.257407	0.428	0.404	4.36956e-18	0.024	TUBB2A	NE-Variant
ENSG00000145349	1.67185e-22	0.319633	0.606	0.582	6.11712e-18	0.024	CAMK2D	NE-Variant
ENSG00000177733	2.05786e-14	0.277674	0.81	0.786	7.5295e-10	0.024	HNRNPA0	NE-Variant
ENSG00000182670	4.08036e-27	0.302637	0.878	0.854	1.49296e-22	0.024	TTC3	NE-Variant
ENSG00000034510	2.14327e-58	0.594325	0.98	0.957	7.84202e-54	0.023	TMSB10	NE-Variant
ENSG00000151552	1.35699e-32	0.274415	0.508	0.485	4.96509e-28	0.023	QDPR	NE-Variant
ENSG00000170558	1.90277e-13	0.2501	0.614	0.591	6.96206e-09	0.023	CDH2	NE-Variant
ENSG00000175130	7.47434e-32	0.447853	0.91	0.887	2.73479e-27	0.023	MARCKSL1	NE-Variant
ENSG00000131051	9.49666e-13	0.271057	0.908	0.886	3.47473e-08	0.022	RBM39	NE-Variant
ENSG00000156011	1.04029e-11	0.252273	0.715	0.693	3.80631e-07	0.022	PSD3	NE-Variant
ENSG00000242242	0.000760809	0.425281	0.611	0.589	1	0.022	NECTIN3-AS1	NE-Variant
ENSG00000184897	5.68328e-14	0.271862	0.818	0.796	2.07945e-09	0.022	H1FX	NE-Variant
ENSG00000100219	4.25041e-09	0.498644	0.488	0.467	0.000155518	0.021	XBP1	NE-Variant
ENSG00000115760	2.1298e-17	0.25551	0.671	0.65	7.79273e-13	0.021	BIRC6	NE-Variant
ENSG00000181061	1.68716e-26	0.339885	0.394	0.373	6.17315e-22	0.021	HIGD1A	NE-Variant
ENSG00000143420	5.13514e-21	0.322728	0.697	0.676	1.8789e-16	0.021	ENSA	NE-Variant
ENSG00000118816	8.86295e-26	0.377761	0.961	0.941	3.24287e-21	0.02	CCNI	NE-Variant
ENSG00000142599	5.81732e-11	0.263462	0.867	0.847	2.1285e-06	0.02	RERE	NE-Variant
ENSG00000144283	4.88114e-20	0.262295	0.622	0.602	1.78596e-15	0.02	PKP4	NE-Variant
ENSG00000070087	8.12928e-24	0.265291	0.646	0.627	2.97442e-19	0.019	PFN2	NE-Variant
ENSG00000123689	4.37101e-05	0.382592	0.285	0.266	1	0.019	G0S2	NE-Variant
ENSG00000176124	3.65239e-26	0.360847	0.814	0.795	1.33637e-21	0.019	DLEU1	NE-Variant
ENSG00000100243	1.24562e-07	0.260591	0.435	0.417	0.00455758	0.018	CYB5R3	NE-Variant
ENSG00000058091	6.3063e-22	0.316216	0.513	0.497	2.30741e-17	0.016	CDK14	NE-Variant
ENSG00000113811	8.15946e-13	0.278981	0.527	0.511	2.98547e-08	0.016	SELENOK	NE-Variant
ENSG00000106571	7.69786e-37	0.454537	0.4	0.385	2.81657e-32	0.015	GLI3	NE-Variant
ENSG00000138495	4.68494e-25	0.406983	0.575	0.561	1.71417e-20	0.014	COX17	NE-Variant
ENSG00000121774	4.75685e-28	0.284011	0.895	0.882	1.74048e-23	0.013	KHDRBS1	NE-Variant
ENSG00000125534	8.81053e-17	0.30188	0.824	0.811	3.22369e-12	0.013	PPDPF	NE-Variant
ENSG00000110492	5.81836e-13	0.349025	0.779	0.767	2.12888e-08	0.012	MDK	NE-Variant
ENSG00000141552	1.71915e-08	0.252556	0.79	0.778	0.000629019	0.012	ANAPC11	NE-Variant
ENSG00000185420	1.91208e-29	0.453393	0.876	0.864	6.9961e-25	0.012	SMYD3	NE-Variant
ENSG00000133872	1.24721e-11	0.265069	0.614	0.604	4.56343e-07	0.01	SARAF	NE-Variant
ENSG00000134308	3.70439e-19	0.305239	0.89	0.88	1.3554e-14	0.01	YWHAQ	NE-Variant
ENSG00000163041	1.77343e-58	0.478181	0.997	0.987	6.48879e-54	0.01	H3F3A	NE-Variant
ENSG00000166681	2.33184e-10	0.289217	0.959	0.951	8.53195e-06	0.008	BEX3	NE-Variant
ENSG00000180370	3.56953e-27	0.26	0.727	0.719	1.30605e-22	0.008	PAK2	NE-Variant
ENSG00000196230	2.56364e-18	0.292463	0.972	0.964	9.38011e-14	0.008	TUBB	NE-Variant
ENSG00000075624	8.45345e-82	0.613012	0.993	0.986	3.09303e-77	0.007	ACTB	NE-Variant
ENSG00000120802	1.79386e-27	0.255446	0.639	0.632	6.56356e-23	0.007	TMPO	NE-Variant
ENSG00000184983	2.77412e-29	0.316281	0.8	0.793	1.01502e-24	0.007	NDUFA6	NE-Variant
ENSG00000143933	1.90743e-21	0.375692	0.94	0.933	6.97909e-17	0.007	CALM2	NE-Variant
ENSG00000188612	3.39301e-25	0.264504	0.973	0.967	1.24147e-20	0.006	SUMO2	NE-Variant
ENSG00000090266	1.70635e-27	0.3254	0.93	0.925	6.24336e-23	0.005	NDUFB2	NE-Variant
ENSG00000112695	1.53682e-05	0.344901	0.964	0.959	0.562308	0.005	COX7A2	NE-Variant
ENSG00000104904	7.77218e-17	0.29424	0.929	0.925	2.84376e-12	0.004	OAZ1	NE-Variant
ENSG00000108176	1.02279e-15	0.284665	0.446	0.442	3.7423e-11	0.004	DNAJC12	NE-Variant
ENSG00000146425	2.37968e-20	0.314183	0.757	0.753	8.707e-16	0.004	DYNLT1	NE-Variant
ENSG00000165675	1.53108e-13	0.256951	0.341	0.337	5.60206e-09	0.004	ENOX2	NE-Variant
ENSG00000196628	9.13158e-48	0.457438	0.664	0.66	3.34115e-43	0.004	TCF4	NE-Variant
ENSG00000185532	3.79534e-18	0.278326	0.49	0.487	1.38868e-13	0.003	PRKG1	NE-Variant
ENSG00000187514	3.49957e-35	0.344091	1	0.997	1.28046e-30	0.003	PTMA	NE-Variant
ENSG00000251562	2.34466e-49	1.19518	1	0.997	8.57886e-45	0.003	MALAT1	NE-Variant
ENSG00000092841	2.33409e-26	0.511812	0.924	0.922	8.5402e-22	0.002	MYL6	NE-Variant
ENSG00000179218	2.79719e-18	0.275313	0.848	0.846	1.02347e-13	0.002	CALR	NE-Variant
ENSG00000124795	1.29945e-23	0.257214	0.897	0.898	4.75457e-19	-0.001	DEK	NE-Variant
ENSG00000004487	1.48211e-44	0.334281	0.694	0.698	5.42288e-40	-0.004	KDM1A	NE-Variant
ENSG00000087460	6.2301e-35	0.313901	0.91	0.914	2.27953e-30	-0.004	GNAS	NE-Variant
ENSG00000108055	2.10651e-36	0.255705	0.738	0.742	7.7075e-32	-0.004	SMC3	NE-Variant
ENSG00000122786	4.62293e-18	0.259749	0.768	0.772	1.69148e-13	-0.004	CALD1	NE-Variant
ENSG00000117410	3.30996e-18	0.298871	0.797	0.802	1.21108e-13	-0.005	ATP6V0B	NE-Variant
ENSG00000164104	8.14195e-23	0.371772	0.636	0.641	2.97906e-18	-0.005	HMGB2	NE-Variant
ENSG00000206503	9.06938e-31	0.787891	0.448	0.456	3.3184e-26	-0.008	HLA-A	NE-Variant
ENSG00000104722	3.329e-62	0.491647	0.376	0.385	1.21805e-57	-0.009	NEFM	NE-Variant
ENSG00000143333	8.39852e-27	0.309489	0.583	0.593	3.07293e-22	-0.01	RGS16	NE-Variant
ENSG00000166562	2.52995e-31	0.718452	0.71	0.721	9.25685e-27	-0.011	SEC11C	NE-Variant
ENSG00000169738	4.04557e-24	0.482872	0.903	0.915	1.48023e-19	-0.012	DCXR	NE-Variant
ENSG00000147862	2.93826e-14	0.275502	0.691	0.704	1.07508e-09	-0.013	NFIB	NE-Variant
ENSG00000166582	1.44152e-57	0.362038	0.842	0.856	5.27438e-53	-0.014	CENPV	NE-Variant
ENSG00000245532	3.64307e-19	0.810015	0.825	0.84	1.33296e-14	-0.015	NEAT1	NE-Variant
ENSG00000164985	2.10157e-33	0.275092	0.787	0.804	7.68943e-29	-0.017	PSIP1	NE-Variant
ENSG00000254999	2.93415e-11	0.25844	0.852	0.87	1.07358e-06	-0.018	BRK1	NE-Variant
ENSG00000148737	1.40975e-48	0.543757	0.503	0.525	5.15815e-44	-0.022	TCF7L2	NE-Variant
ENSG00000162599	1.01864e-25	0.552383	0.706	0.73	3.72711e-21	-0.024	NFIA	NE-Variant
ENSG00000178980	7.1182e-17	0.359117	0.656	0.682	2.60448e-12	-0.026	SELENOW	NE-Variant
ENSG00000178568	8.99508e-31	0.703328	0.554	0.6	3.29121e-26	-0.046	ERBB4	NE-Variant
ENSG00000117724	1.12e-15	0.292075	0.481	0.529	4.09798e-11	-0.048	CENPF	NE-Variant
ENSG00000151789	4.73938e-41	0.424621	0.326	0.385	1.73409e-36	-0.059	ZNF385D	NE-Variant
EGFP	1.31622e-59	0.507933	0.794	0.891	4.81593e-55	-0.097	EGFP	NE-Variant
ENSG00000166710	1.06691e-37	0.992072	0.558	0.713	3.90371e-33	-0.155	B2M	NE-Variant
ENSG00000184357	8.151e-59	0.999222	0.715	0.304	2.98237e-54	0.411	HIST1H1B	NPC1
ENSG00000197409	1.15491e-53	0.535549	0.63	0.223	4.22571e-49	0.407	HIST1H3D	NPC1
ENSG00000184260	2.09787e-52	0.53205	0.62	0.22	7.6759e-48	0.4	HIST2H2AC	NPC1
ENSG00000187837	7.52158e-53	0.812764	0.754	0.368	2.75207e-48	0.386	HIST1H1C	NPC1
ENSG00000286522	7.47607e-48	0.604736	0.63	0.245	2.73542e-43	0.385	HIST1H3B	NPC1
ENSG00000124575	5.34718e-56	0.965476	0.725	0.346	1.95648e-51	0.379	HIST1H1D	NPC1
ENSG00000168298	2.09357e-45	0.643367	0.682	0.323	7.66016e-41	0.359	HIST1H1E	NPC1
ENSG00000203852	6.11072e-41	0.485815	0.502	0.169	2.23585e-36	0.333	HIST2H3A	NPC1
ENSG00000273983	3.43585e-37	0.355139	0.439	0.134	1.25714e-32	0.305	HIST1H3G	NPC1
ENSG00000196787	1.13717e-32	0.307315	0.469	0.171	4.1608e-28	0.298	HIST1H2AG	NPC1
ENSG00000083067	5.37739e-25	0.635124	0.639	0.357	1.96753e-20	0.282	TRPM3	NPC1
ENSG00000131747	2.4008e-17	0.379897	0.659	0.399	8.78429e-13	0.26	TOP2A	NPC1
ENSG00000081803	2.07337e-20	0.443852	0.636	0.378	7.58624e-16	0.258	CADPS2	NPC1
ENSG00000168702	3.04475e-24	0.60728	0.557	0.306	1.11404e-19	0.251	LRP1B	NPC1
ENSG00000277775	4.45584e-30	0.2673	0.328	0.087	1.63035e-25	0.241	HIST1H3F	NPC1
ENSG00000242808	2.98088e-20	0.523657	0.492	0.253	1.09067e-15	0.239	SOX2-OT	NPC1
ENSG00000188158	1.80044e-19	0.252297	0.498	0.26	6.58763e-15	0.238	NHS	NPC1
ENSG00000038295	1.77669e-18	0.340368	0.452	0.218	6.50072e-14	0.234	TLL1	NPC1
ENSG00000248550	7.08645e-25	0.691196	0.374	0.147	2.59286e-20	0.227	OTX2-AS1	NPC1
ENSG00000182667	6.88877e-18	0.301282	0.639	0.413	2.52053e-13	0.226	NTM	NPC1
ENSG00000177685	2.64239e-11	0.321984	0.702	0.48	9.66823e-07	0.222	CRACR2B	NPC1
ENSG00000145934	7.16311e-20	0.482707	0.384	0.175	2.62091e-15	0.209	TENM2	NPC1
ENSG00000269821	1.26173e-18	0.613074	0.607	0.409	4.61655e-14	0.198	KCNQ1OT1	NPC1
ENSG00000261008	1.45286e-10	0.254524	0.62	0.423	5.31587e-06	0.197	LINC01572	NPC1
ENSG00000120549	3.84122e-14	0.30139	0.574	0.379	1.40547e-09	0.195	KIAA1217	NPC1
ENSG00000247809	1.1199e-11	0.307351	0.607	0.419	4.0976e-07	0.188	NR2F2-AS1	NPC1
ENSG00000154864	8.0728e-13	0.306177	0.6	0.416	2.95376e-08	0.184	PIEZO2	NPC1
ENSG00000163694	1.51986e-10	0.259487	0.505	0.322	5.56101e-06	0.183	RBM47	NPC1
ENSG00000148700	2.30007e-14	0.297107	0.4	0.223	8.41571e-10	0.177	ADD3	NPC1
ENSG00000243620	1.97325e-17	0.380108	0.646	0.47	7.21994e-13	0.176	AC092957.1	NPC1
ENSG00000134986	1.34702e-09	0.266411	0.607	0.434	4.92862e-05	0.173	NREP	NPC1
ENSG00000127928	5.62399e-09	0.266679	0.639	0.467	0.000205776	0.172	GNGT1	NPC1
ENSG00000134138	5.04521e-26	0.673392	0.43	0.261	1.84599e-21	0.169	MEIS2	NPC1
ENSG00000075711	3.30988e-13	0.36645	0.77	0.602	1.21105e-08	0.168	DLG1	NPC1
ENSG00000132849	3.45819e-16	0.4205	0.482	0.315	1.26532e-11	0.167	PATJ	NPC1
ENSG00000117114	8.20974e-11	0.334736	0.498	0.333	3.00386e-06	0.165	ADGRL2	NPC1
ENSG00000169218	3.10238e-19	0.257355	0.233	0.068	1.13513e-14	0.165	RSPO1	NPC1
ENSG00000117724	4.73319e-09	0.328409	0.682	0.521	0.000173183	0.161	CENPF	NPC1
ENSG00000111907	4.04789e-12	0.34493	0.548	0.389	1.48108e-07	0.159	TPD52L1	NPC1
ENSG00000165588	3.04016e-10	0.314775	0.393	0.234	1.11237e-05	0.159	OTX2	NPC1
ENSG00000116106	2.71576e-16	0.419273	0.315	0.157	9.93668e-12	0.158	EPHA4	NPC1
ENSG00000185551	7.73796e-13	0.300731	0.79	0.635	2.83124e-08	0.155	NR2F2	NPC1
ENSG00000113361	1.36311e-34	0.541362	0.187	0.034	4.98748e-30	0.153	CDH6	NPC1
ENSG00000125968	4.9627e-07	0.349556	0.721	0.568	0.018158	0.153	ID1	NPC1
ENSG00000215845	2.1399e-09	0.262356	0.607	0.454	7.82968e-05	0.153	TSTD1	NPC1
ENSG00000154639	3.19664e-15	0.336608	0.472	0.326	1.16962e-10	0.146	CXADR	NPC1
ENSG00000173157	4.05889e-07	0.334288	0.584	0.441	0.0148511	0.143	ADAMTS20	NPC1
ENSG00000113140	3.94069e-08	0.327903	0.426	0.284	0.00144186	0.142	SPARC	NPC1
ENSG00000177570	3.19557e-13	0.272782	0.295	0.153	1.16923e-08	0.142	SAMD12	NPC1
ENSG00000108018	1.80443e-17	0.370193	0.236	0.095	6.60224e-13	0.141	SORCS1	NPC1
ENSG00000163110	1.08993e-07	0.267208	0.551	0.41	0.00398794	0.141	PDLIM5	NPC1
ENSG00000138801	9.30756e-06	0.256679	0.561	0.421	0.340554	0.14	PAPSS1	NPC1
ENSG00000069667	1.90719e-08	0.269274	0.564	0.425	0.000697824	0.139	RORA	NPC1
ENSG00000111057	1.09452e-08	0.250995	0.551	0.415	0.000400476	0.136	KRT18	NPC1
ENSG00000150672	1.0357e-07	0.326076	0.498	0.363	0.00378953	0.135	DLG2	NPC1
ENSG00000226383	8.46795e-06	0.266508	0.646	0.515	0.309834	0.131	LINC01876	NPC1
ENSG00000094975	1.95144e-14	0.364365	0.38	0.253	7.14011e-10	0.127	SUCO	NPC1
ENSG00000171634	5.23796e-10	0.259386	0.866	0.74	1.91652e-05	0.126	BPTF	NPC1
ENSG00000188229	1.62494e-09	0.260718	0.846	0.724	5.94549e-05	0.122	TUBB4B	NPC1
ENSG00000245532	1.10318e-15	0.273421	0.957	0.836	4.03641e-11	0.121	NEAT1	NPC1
ENSG00000264569	5.9813e-11	0.269957	0.767	0.649	2.1885e-06	0.118	DCXR-DT	NPC1
ENSG00000132386	1.43444e-05	0.262221	0.541	0.427	0.524849	0.114	SERPINF1	NPC1
ENSG00000085662	1.48313e-08	0.264624	0.757	0.644	0.000542662	0.113	AKR1B1	NPC1
ENSG00000136156	7.72807e-25	0.826635	0.734	0.623	2.82762e-20	0.111	ITM2B	NPC1
ENSG00000230937	2.33313e-31	0.839789	0.118	0.008	8.53669e-27	0.11	MIR205HG	NPC1
ENSG00000225087	2.65156e-24	0.438054	0.174	0.068	9.70181e-20	0.106	AL583808.1	NPC1
ENSG00000213722	1.50356e-17	0.332276	0.282	0.177	5.50138e-13	0.105	DDAH2	NPC1
ENSG00000069188	3.16287e-10	0.263783	0.223	0.12	1.15726e-05	0.103	SDK2	NPC1
ENSG00000142669	1.04764e-06	0.337593	0.515	0.412	0.0383321	0.103	SH3BGRL3	NPC1
ENSG00000163637	1.39419e-22	0.347789	0.161	0.058	5.10121e-18	0.103	PRICKLE2	NPC1
ENSG00000169760	1.96759e-11	0.421466	0.318	0.215	7.19923e-07	0.103	NLGN1	NPC1
ENSG00000197921	0.000586094	0.355126	0.397	0.297	1	0.1	HES5	NPC1
ENSG00000064651	2.31478e-11	0.392793	0.475	0.377	8.46957e-07	0.098	SLC12A2	NPC1
ENSG00000091844	5.16766e-35	0.480088	0.223	0.125	1.89079e-30	0.098	RGS17	NPC1
ENSG00000213563	0.00166589	0.265883	0.652	0.556	1	0.096	C8orf82	NPC1
ENSG00000135643	8.37133e-32	0.425828	0.161	0.066	3.06299e-27	0.095	KCNMB4	NPC1
ENSG00000117394	7.94234e-29	0.723286	0.403	0.31	2.90602e-24	0.093	SLC2A1	NPC1
ENSG00000184226	6.90031e-08	0.324219	0.2	0.109	0.00252475	0.091	PCDH9	NPC1
ENSG00000109046	1.49451e-05	0.288828	0.626	0.537	0.546825	0.089	WSB1	NPC1
ENSG00000257261	5.42322e-15	0.254921	0.151	0.062	1.9843e-10	0.089	AC008014.1	NPC1
ENSG00000283154	2.68163e-22	0.628951	0.154	0.066	9.81182e-18	0.088	IQCJ-SCHIP1	NPC1
ENSG00000197061	5.64161e-68	1.40029	0.915	0.832	2.06421e-63	0.083	HIST1H4C	NPC1
ENSG00000183117	2.40594e-28	0.769118	0.131	0.048	8.80308e-24	0.083	CSMD1	NPC1
ENSG00000187889	8.56546e-12	0.332235	0.102	0.021	3.13402e-07	0.081	FYB2	NPC1
ENSG00000237978	4.50376e-11	0.300242	0.311	0.23	1.64788e-06	0.081	KCNMB2-AS1	NPC1
ENSG00000049130	3.78837e-32	0.419953	0.118	0.038	1.38613e-27	0.08	KITLG	NPC1
ENSG00000111664	1.79137e-10	0.250567	0.128	0.048	6.55444e-06	0.08	GNB3	NPC1
ENSG00000149212	1.22689e-08	0.253881	0.272	0.192	0.000448907	0.08	SESN3	NPC1
ENSG00000114115	2.28294e-15	0.439306	0.285	0.206	8.35306e-11	0.079	RBP1	NPC1
ENSG00000164096	8.71197e-06	0.3625	0.741	0.662	0.318762	0.079	C4orf3	NPC1
ENSG00000196549	3.84873e-31	0.45185	0.105	0.026	1.40821e-26	0.079	MME	NPC1
ENSG00000151914	9.52679e-08	0.414383	0.711	0.633	0.00348576	0.078	DST	NPC1
ENSG00000143774	1.39642e-09	0.254203	0.967	0.89	5.10937e-05	0.077	GUK1	NPC1
ENSG00000148180	2.90333e-38	0.425545	0.197	0.12	1.0623e-33	0.077	GSN	NPC1
ENSG00000114023	0.00207621	0.301406	0.898	0.822	1	0.076	FAM162A	NPC1
ENSG00000129521	3.77954e-07	0.251213	0.315	0.239	0.013829	0.076	EGLN3	NPC1
ENSG00000182670	1.63592e-13	0.315445	0.928	0.854	5.98568e-09	0.074	TTC3	NPC1
ENSG00000105825	1.44986e-27	0.503126	0.102	0.029	5.30488e-23	0.073	TFPI2	NPC1
ENSG00000115414	6.49954e-18	0.359353	0.184	0.113	2.37811e-13	0.071	FN1	NPC1
ENSG00000111885	5.64355e-24	0.355294	0.174	0.104	2.06492e-19	0.07	MAN1A1	NPC1
ENSG00000185633	1.03729e-11	0.597543	0.193	0.124	3.79533e-07	0.069	NDUFA4L2	NPC1
ENSG00000164692	2.46905e-23	0.437074	0.157	0.09	9.03401e-19	0.067	COL1A2	NPC1
ENSG00000129757	1.19016e-14	0.981595	0.262	0.196	4.35469e-10	0.066	CDKN1C	NPC1
ENSG00000059804	2.12372e-37	0.678842	0.187	0.122	7.77046e-33	0.065	SLC2A3	NPC1
ENSG00000183570	9.49002e-28	0.385155	0.118	0.056	3.4723e-23	0.062	PCBP3	NPC1
ENSG00000075213	8.64488e-13	0.297674	0.252	0.192	3.16307e-08	0.06	SEMA3A	NPC1
ENSG00000138061	3.5076e-16	0.272109	0.141	0.081	1.28339e-11	0.06	CYP1B1	NPC1
ENSG00000148655	2.10003e-12	0.309972	0.216	0.16	7.68381e-08	0.056	LRMDA	NPC1
ENSG00000184384	2.79832e-07	0.283765	0.2	0.144	0.0102388	0.056	MAML2	NPC1
ENSG00000103175	6.35943e-10	0.265609	0.105	0.05	2.32685e-05	0.055	WFDC1	NPC1
ENSG00000170421	4.11998e-07	0.285751	0.325	0.27	0.0150746	0.055	KRT8	NPC1
ENSG00000204262	1.84196e-28	0.392894	0.121	0.071	6.73956e-24	0.05	COL5A2	NPC1
ENSG00000148690	5.42279e-09	0.339246	0.43	0.386	0.000198414	0.044	FRA10AC1	NPC1
ENSG00000143320	1.02083e-11	0.386214	0.308	0.27	3.73511e-07	0.038	CRABP2	NPC1
ENSG00000171345	1.2203e-16	0.59564	0.223	0.188	4.46497e-12	0.035	KRT19	NPC1
ENSG00000165078	2.34754e-06	0.30263	0.121	0.095	0.085894	0.026	CPA6	NPC1
ENSG00000196230	1.30298e-12	0.279894	0.987	0.964	4.76747e-08	0.023	TUBB	NPC1
ENSG00000084207	1.51656e-10	0.285847	1	0.981	5.54894e-06	0.019	GSTP1	NPC1
ENSG00000167996	1.41381e-08	0.450721	1	0.983	0.0005173	0.017	FTH1	NPC1
ENSG00000240972	2.4062e-16	0.270593	1	0.993	8.80406e-12	0.007	MIF	NPC1
ENSG00000113448	1.76929e-06	0.296775	0.449	0.446	0.0647364	0.003	PDE4D	NPC1
ENSG00000251562	6.92518e-25	0.58028	1	0.997	2.53386e-20	0.003	MALAT1	NPC1
ENSG00000135047	3.66635e-06	0.250349	0.361	0.359	0.134148	0.002	CTSL	NPC1
ENSG00000090013	3.00964e-20	0.25265	0.18	0.185	1.1012e-15	-0.005	BLVRB	NPC1
ENSG00000069011	2.79436e-05	0.262714	0.298	0.306	1	-0.008	PITX1	NPC1
ENSG00000163191	6.35177e-09	0.479619	0.305	0.317	0.000232405	-0.012	S100A11	NPC1
ENSG00000092853	2.94195e-147	0.315201	0.5	0.232	1.07643e-142	0.268	CLSPN	NPC2
ENSG00000171848	1.94849e-163	0.283706	0.487	0.221	7.12934e-159	0.266	RRM2	NPC2
ENSG00000143320	6.61885e-108	0.86102	0.454	0.192	2.42177e-103	0.262	CRABP2	NPC2
ENSG00000132646	2.19491e-168	0.400652	0.702	0.45	8.03096e-164	0.252	PCNA	NPC2
ENSG00000166803	3.93225e-241	0.515411	0.777	0.528	1.43877e-236	0.249	PCLAF	NPC2
ENSG00000131153	2.98657e-150	0.314334	0.632	0.387	1.09276e-145	0.245	GINS2	NPC2
ENSG00000130203	5.43911e-44	0.690171	0.441	0.217	1.99011e-39	0.224	APOE	NPC2
ENSG00000168496	2.38111e-125	0.281685	0.61	0.386	8.71224e-121	0.224	FEN1	NPC2
ENSG00000163950	1.93047e-72	0.284342	0.682	0.459	7.06339e-68	0.223	SLBP	NPC2
ENSG00000122952	1.60542e-98	0.258999	0.505	0.286	5.87407e-94	0.219	ZWINT	NPC2
ENSG00000077152	9.7633e-86	0.313774	0.637	0.42	3.57229e-81	0.217	UBE2T	NPC2
ENSG00000118508	4.83271e-49	0.348938	0.513	0.298	1.76824e-44	0.215	RAB32	NPC2
ENSG00000158710	4.73541e-82	0.461874	0.753	0.539	1.73264e-77	0.214	TAGLN2	NPC2
ENSG00000103485	9.38844e-73	0.390729	0.796	0.584	3.43514e-68	0.212	QPRT	NPC2
ENSG00000142089	1.0438e-68	0.769952	0.568	0.356	3.81915e-64	0.212	IFITM3	NPC2
ENSG00000182718	1.34731e-66	0.976118	0.558	0.346	4.92969e-62	0.212	ANXA2	NPC2
ENSG00000197747	8.10833e-92	1.08758	0.346	0.136	2.96676e-87	0.21	S100A10	NPC2
ENSG00000178980	4.03228e-73	0.442998	0.826	0.618	1.47537e-68	0.208	SELENOW	NPC2
ENSG00000166347	6.21151e-36	0.314785	0.548	0.341	2.27273e-31	0.207	CYB5A	NPC2
ENSG00000111057	5.09646e-37	0.471496	0.563	0.357	1.86474e-32	0.206	KRT18	NPC2
ENSG00000163191	5.90495e-26	0.792102	0.461	0.255	2.16056e-21	0.206	S100A11	NPC2
ENSG00000112312	1.45284e-127	0.340873	0.744	0.539	5.31578e-123	0.205	GMNN	NPC2
ENSG00000119655	4.87074e-60	0.919418	0.475	0.27	1.78215e-55	0.205	NPC2	NPC2
ENSG00000091651	4.06156e-101	0.253613	0.64	0.436	1.48608e-96	0.204	ORC6	NPC2
ENSG00000142227	5.82026e-36	0.4199	0.448	0.245	2.12957e-31	0.203	EMP3	NPC2
ENSG00000142669	6.90477e-37	0.280683	0.557	0.354	2.52638e-32	0.203	SH3BGRL3	NPC2
ENSG00000120437	8.44108e-76	0.36246	0.595	0.393	3.08851e-71	0.202	ACAT2	NPC2
ENSG00000185222	6.68975e-49	0.392473	0.758	0.556	2.44771e-44	0.202	TCEAL9	NPC2
ENSG00000149257	3.15233e-31	0.33846	0.411	0.211	1.15341e-26	0.2	SERPINH1	NPC2
ENSG00000244187	3.37979e-36	0.286552	0.53	0.337	1.23663e-31	0.193	TMEM141	NPC2
ENSG00000170421	7.42762e-16	0.519408	0.406	0.214	2.71769e-11	0.192	KRT8	NPC2
ENSG00000145050	1.27481e-51	0.299896	0.724	0.534	4.6644e-47	0.19	MANF	NPC2
ENSG00000140416	4.86756e-37	0.312124	0.574	0.389	1.78099e-32	0.185	TPM1	NPC2
ENSG00000153048	1.78127e-76	0.280344	0.773	0.588	6.51748e-72	0.185	CARHSP1	NPC2
ENSG00000102265	4.36877e-16	0.387119	0.389	0.206	1.59849e-11	0.183	TIMP1	NPC2
ENSG00000104763	6.56994e-23	0.267847	0.514	0.331	2.40387e-18	0.183	ASAH1	NPC2
ENSG00000051523	2.83943e-29	0.279089	0.458	0.276	1.03892e-24	0.182	CYBA	NPC2
ENSG00000075618	3.6231e-24	0.29837	0.397	0.215	1.32566e-19	0.182	FSCN1	NPC2
ENSG00000101608	2.94046e-32	0.377003	0.733	0.551	1.07588e-27	0.182	MYL12A	NPC2
ENSG00000130429	1.09879e-18	0.295112	0.419	0.238	4.02038e-14	0.181	ARPC1B	NPC2
ENSG00000171345	5.93881e-35	0.828288	0.316	0.135	2.17295e-30	0.181	KRT19	NPC2
ENSG00000176890	1.55594e-240	0.498973	0.821	0.641	5.69301e-236	0.18	TYMS	NPC2
ENSG00000044574	3.14323e-33	0.299832	0.696	0.517	1.15007e-28	0.179	HSPA5	NPC2
ENSG00000184357	2.98434e-94	0.257917	0.441	0.262	1.09194e-89	0.179	HIST1H1B	NPC2
ENSG00000160789	2.34932e-18	0.271399	0.429	0.251	8.59592e-14	0.178	LMNA	NPC2
ENSG00000164096	1.16231e-45	0.448919	0.788	0.611	4.25279e-41	0.177	C4orf3	NPC2
ENSG00000166710	2.5746e-52	0.611348	0.827	0.65	9.4202e-48	0.177	B2M	NPC2
ENSG00000175183	2.2785e-27	0.304171	0.496	0.326	8.33682e-23	0.17	CSRP2	NPC2
ENSG00000185201	9.10215e-40	0.379544	0.263	0.093	3.33038e-35	0.17	IFITM2	NPC2
ENSG00000164109	5.39509e-102	0.311877	0.731	0.562	1.97401e-97	0.169	MAD2L1	NPC2
ENSG00000167460	4.90464e-29	0.267732	0.705	0.536	1.79456e-24	0.169	TPM4	NPC2
ENSG00000173207	1.73481e-84	0.267956	0.783	0.615	6.34748e-80	0.168	CKS1B	NPC2
ENSG00000177697	2.57117e-43	0.315667	0.724	0.557	9.40767e-39	0.167	CD151	NPC2
ENSG00000105854	2.01009e-26	0.330967	0.361	0.195	7.35471e-22	0.166	PON2	NPC2
ENSG00000136240	8.79745e-30	0.338451	0.732	0.567	3.2189e-25	0.165	KDELR2	NPC2
ENSG00000113732	1.23172e-18	0.343159	0.745	0.584	4.50674e-14	0.161	ATP6V0E1	NPC2
ENSG00000143198	8.79179e-72	0.295817	0.853	0.693	3.21683e-67	0.16	MGST3	NPC2
ENSG00000129757	1.4379e-23	0.346508	0.309	0.15	5.26112e-19	0.159	CDKN1C	NPC2
ENSG00000206503	1.31075e-14	0.262149	0.567	0.408	4.79591e-10	0.159	HLA-A	NPC2
ENSG00000068697	3.17618e-19	0.282246	0.639	0.481	1.16213e-14	0.158	LAPTM4A	NPC2
ENSG00000117318	9.7794e-11	0.261291	0.349	0.192	3.57818e-06	0.157	ID3	NPC2
ENSG00000185650	5.85489e-34	0.516544	0.424	0.267	2.14224e-29	0.157	ZFP36L1	NPC2
ENSG00000143153	1.41519e-26	0.321243	0.492	0.338	5.17804e-22	0.154	ATP1B1	NPC2
ENSG00000181649	2.16838e-10	0.373754	0.297	0.146	7.9339e-06	0.151	PHLDA2	NPC2
ENSG00000221869	6.37683e-27	0.521801	0.329	0.178	2.33322e-22	0.151	CEBPD	NPC2
ENSG00000172922	5.28012e-33	0.266361	0.667	0.518	1.93194e-28	0.149	RNASEH2C	NPC2
ENSG00000146425	8.79087e-44	0.266867	0.857	0.709	3.21649e-39	0.148	DYNLT1	NPC2
ENSG00000164733	1.44081e-18	0.252176	0.345	0.201	5.27178e-14	0.144	CTSB	NPC2
ENSG00000101856	1.77238e-58	0.354766	0.813	0.67	6.48495e-54	0.143	PGRMC1	NPC2
ENSG00000155366	5.51583e-05	0.291146	0.37	0.227	1	0.143	RHOC	NPC2
ENSG00000160213	3.78269e-52	0.441915	0.837	0.695	1.38405e-47	0.142	CSTB	NPC2
ENSG00000105223	5.75525e-09	0.276572	0.591	0.45	0.000210579	0.141	PLD3	NPC2
ENSG00000118680	8.32127e-31	0.270517	0.853	0.712	3.04467e-26	0.141	MYL12B	NPC2
ENSG00000168374	4.25537e-18	0.262131	0.716	0.576	1.557e-13	0.14	ARF4	NPC2
ENSG00000145012	1.34684e-11	0.276619	0.458	0.322	4.92796e-07	0.136	LPP	NPC2
ENSG00000108821	3.491e-32	0.311737	0.192	0.057	1.27732e-27	0.135	COL1A1	NPC2
ENSG00000110492	4.08799e-40	0.372671	0.862	0.727	1.49576e-35	0.135	MDK	NPC2
ENSG00000117394	2.01216e-06	0.318606	0.406	0.273	0.073623	0.133	SLC2A1	NPC2
ENSG00000103811	2.33972e-23	0.286362	0.316	0.184	8.5608e-19	0.132	CTSH	NPC2
ENSG00000122691	1.43067e-42	0.508007	0.238	0.108	5.23469e-38	0.13	TWIST1	NPC2
ENSG00000167553	2.37545e-35	0.265409	0.848	0.719	8.69154e-31	0.129	TUBA1C	NPC2
ENSG00000008394	1.12972e-60	0.368676	0.926	0.798	4.13352e-56	0.128	MGST1	NPC2
ENSG00000100906	2.37986e-54	0.893926	0.374	0.249	8.70767e-50	0.125	NFKBIA	NPC2
ENSG00000059804	3.04491e-14	0.256401	0.211	0.087	1.1141e-09	0.124	SLC2A3	NPC2
ENSG00000197930	4.72404e-09	0.262714	0.488	0.364	0.000172848	0.124	ERO1A	NPC2
ENSG00000213719	1.35089e-53	0.358232	0.919	0.795	4.94278e-49	0.124	CLIC1	NPC2
ENSG00000184840	7.13172e-14	0.261967	0.767	0.644	2.60943e-09	0.123	TMED9	NPC2
ENSG00000112378	0.00322172	0.258711	0.337	0.215	1	0.122	PERP	NPC2
ENSG00000148834	1.42271e-48	0.261775	0.807	0.685	5.20554e-44	0.122	GSTO1	NPC2
ENSG00000184990	1.05239e-105	0.25189	0.869	0.747	3.85057e-101	0.122	SIVA1	NPC2
ENSG00000134152	6.39436e-14	0.541419	0.585	0.464	2.33963e-09	0.121	KATNBL1	NPC2
ENSG00000145247	2.00167e-15	0.422551	0.601	0.481	7.32392e-11	0.12	OCIAD2	NPC2
ENSG00000096696	3.62224e-08	0.319669	0.266	0.148	0.00132534	0.118	DSP	NPC2
ENSG00000155368	5.17933e-76	0.354849	0.914	0.798	1.89507e-71	0.116	DBI	NPC2
ENSG00000169689	1.38118e-136	0.330088	0.887	0.771	5.05362e-132	0.116	CENPX	NPC2
ENSG00000171314	1.04594e-46	0.251726	0.878	0.762	3.82698e-42	0.116	PGAM1	NPC2
ENSG00000179218	2.04985e-54	0.263265	0.927	0.811	7.50019e-50	0.116	CALR	NPC2
ENSG00000075142	3.40748e-68	0.260393	0.919	0.804	1.24676e-63	0.115	SRI	NPC2
ENSG00000161011	5.56976e-10	0.270716	0.625	0.51	2.03792e-05	0.115	SQSTM1	NPC2
ENSG00000171877	2.34298e-06	0.386521	0.313	0.198	0.0857272	0.115	FRMD5	NPC2
ENSG00000141526	0.00260529	0.264207	0.247	0.134	1	0.113	SLC16A3	NPC2
ENSG00000196776	1.70068e-11	0.265491	0.445	0.332	6.22262e-07	0.113	CD47	NPC2
ENSG00000242265	6.95088e-24	0.274498	0.724	0.611	2.54326e-19	0.113	PEG10	NPC2
ENSG00000197956	4.24224e-19	0.885918	0.238	0.126	1.55219e-14	0.112	S100A6	NPC2
ENSG00000133110	1.86494e-24	0.264002	0.157	0.046	6.82361e-20	0.111	POSTN	NPC2
ENSG00000160752	2.00648e-78	0.312486	0.853	0.742	7.34151e-74	0.111	FDPS	NPC2
ENSG00000010278	7.1493e-08	0.396342	0.234	0.125	0.00261586	0.109	CD9	NPC2
ENSG00000128951	4.40613e-260	0.485428	0.879	0.77	1.61216e-255	0.109	DUT	NPC2
ENSG00000137331	4.1753e-13	0.267053	0.225	0.118	1.5277e-08	0.107	IER3	NPC2
ENSG00000128524	3.71297e-45	0.265807	0.928	0.826	1.35854e-40	0.102	ATP6V1F	NPC2
ENSG00000170296	1.86498e-29	0.279457	0.906	0.804	6.82378e-25	0.102	GABARAP	NPC2
ENSG00000126432	8.25781e-55	0.306287	0.924	0.824	3.02145e-50	0.1	PRDX5	NPC2
ENSG00000130066	2.10906e-18	0.734587	0.255	0.156	7.71686e-14	0.099	SAT1	NPC2
ENSG00000115414	2.69352e-13	0.269349	0.182	0.087	9.8553e-09	0.095	FN1	NPC2
ENSG00000197061	1.33645e-81	0.36641	0.901	0.806	4.88993e-77	0.095	HIST1H4C	NPC2
ENSG00000182117	3.48034e-42	0.290403	0.936	0.843	1.27342e-37	0.093	NOP10	NPC2
ENSG00000105185	5.44893e-65	0.394622	0.882	0.79	1.99371e-60	0.092	PDCD5	NPC2
ENSG00000136888	2.41775e-16	0.279511	0.899	0.808	8.84632e-12	0.091	ATP6V1G1	NPC2
ENSG00000180287	6.98742e-49	0.318057	0.24	0.149	2.55663e-44	0.091	PLD5	NPC2
ENSG00000102144	4.99996e-37	0.333187	0.947	0.857	1.82943e-32	0.09	PGK1	NPC2
ENSG00000140905	1.54959e-75	0.318858	0.849	0.759	5.66979e-71	0.09	GCSH	NPC2
ENSG00000118640	0.000538799	0.265833	0.234	0.145	1	0.089	VAMP8	NPC2
ENSG00000111229	2.1783e-23	0.262428	0.918	0.83	7.97017e-19	0.088	ARPC3	NPC2
ENSG00000020577	1.6614e-12	0.438943	0.259	0.172	6.0789e-08	0.087	SAMD4A	NPC2
ENSG00000114023	3.31651e-24	0.326071	0.885	0.798	1.21348e-19	0.087	FAM162A	NPC2
ENSG00000132432	3.52239e-49	0.370616	0.958	0.871	1.28881e-44	0.087	SEC61G	NPC2
ENSG00000169429	3.5873e-69	1.53128	0.113	0.026	1.31256e-64	0.087	CXCL8	NPC2
ENSG00000170017	6.44756e-12	0.446581	0.281	0.195	2.3591e-07	0.086	ALCAM	NPC2
ENSG00000176907	1.65168e-52	0.427107	0.118	0.032	6.04332e-48	0.086	TCIM	NPC2
ENSG00000165802	3.38184e-23	0.251484	0.487	0.403	1.23738e-18	0.084	NSMF	NPC2
ENSG00000184697	4.28952e-29	0.357019	0.119	0.035	1.56949e-24	0.084	CLDN6	NPC2
ENSG00000142871	4.68728e-19	0.447931	0.17	0.087	1.71503e-14	0.083	CCN1	NPC2
ENSG00000092841	4.18859e-87	0.573814	0.98	0.898	1.53256e-82	0.082	MYL6	NPC2
ENSG00000129235	3.44319e-51	0.272659	0.92	0.839	1.25983e-46	0.081	TXNDC17	NPC2
ENSG00000163466	1.29369e-44	0.39639	0.922	0.841	4.7335e-40	0.081	ARPC2	NPC2
ENSG00000109321	5.1417e-16	0.429641	0.138	0.057	1.8813e-11	0.081	AREG	NPC2
ENSG00000135404	1.57453e-33	0.50414	0.943	0.862	5.76104e-29	0.081	CD63	NPC2
ENSG00000169908	2.82581e-41	0.706243	0.14	0.059	1.03394e-36	0.081	TM4SF1	NPC2
ENSG00000198668	6.49752e-28	0.289809	0.924	0.844	2.37738e-23	0.08	CALM1	NPC2
ENSG00000251003	4.10035e-15	0.255739	0.13	0.05	1.50028e-10	0.08	ZFPM2-AS1	NPC2
ENSG00000116285	5.39392e-12	0.353245	0.192	0.114	1.97358e-07	0.078	ERRFI1	NPC2
ENSG00000163082	3.73069e-38	0.431208	0.11	0.033	1.36502e-33	0.077	SGPP2	NPC2
ENSG00000126067	8.59677e-28	0.256178	0.868	0.792	3.14547e-23	0.076	PSMB2	NPC2
ENSG00000245532	8.26344e-12	0.491516	0.892	0.817	3.02351e-07	0.075	NEAT1	NPC2
ENSG00000146555	5.68478e-15	0.328054	0.63	0.555	2.08e-10	0.075	SDK1	NPC2
ENSG00000182154	1.35596e-44	0.284727	0.882	0.807	4.96131e-40	0.075	MRPL41	NPC2
ENSG00000228474	7.15549e-55	0.260914	0.969	0.894	2.61812e-50	0.075	OST4	NPC2
ENSG00000132963	1.39244e-37	0.275244	0.954	0.881	5.09478e-33	0.073	POMP	NPC2
ENSG00000172115	1.43839e-30	0.269856	0.93	0.86	5.26293e-26	0.07	CYCS	NPC2
ENSG00000198467	3.17583e-68	0.314328	0.817	0.747	1.162e-63	0.07	TPM2	NPC2
ENSG00000101443	0.00171979	0.666656	0.176	0.107	1	0.069	WFDC2	NPC2
ENSG00000143933	2.53869e-67	0.333268	0.982	0.913	9.2888e-63	0.069	CALM2	NPC2
ENSG00000053438	2.91565e-16	0.378344	0.349	0.283	1.06681e-11	0.066	NNAT	NPC2
ENSG00000118523	2.59353e-16	0.283865	0.126	0.063	9.48948e-12	0.063	CCN2	NPC2
ENSG00000205542	3.25224e-07	0.732644	0.849	0.786	0.0118996	0.063	TMSB4X	NPC2
ENSG00000042753	1.73493e-48	0.285858	0.949	0.888	6.34795e-44	0.061	AP2S1	NPC2
ENSG00000128590	0.000469605	0.251754	0.203	0.145	1	0.058	DNAJB9	NPC2
ENSG00000088986	1.63245e-83	0.311901	0.978	0.921	5.97298e-79	0.057	DYNLL1	NPC2
ENSG00000189159	8.47438e-45	0.335154	0.968	0.911	3.10069e-40	0.057	JPT1	NPC2
ENSG00000178127	2.44328e-46	0.258871	0.915	0.859	8.9397e-42	0.056	NDUFV2	NPC2
ENSG00000113387	5.98956e-26	0.273553	0.958	0.907	2.19152e-21	0.051	SUB1	NPC2
ENSG00000099901	5.36192e-75	0.316977	0.93	0.88	1.96187e-70	0.05	RANBP1	NPC2
ENSG00000108518	9.51596e-86	0.413509	0.991	0.941	3.48179e-81	0.05	PFN1	NPC2
ENSG00000166681	1.10858e-101	0.284375	0.987	0.937	4.05618e-97	0.05	BEX3	NPC2
ENSG00000184076	8.49544e-85	0.26197	0.985	0.936	3.1084e-80	0.049	UQCR10	NPC2
ENSG00000004779	2.23899e-46	0.269406	0.93	0.884	8.19224e-42	0.046	NDUFAB1	NPC2
ENSG00000101182	1.09075e-67	0.292875	0.98	0.935	3.99096e-63	0.045	PSMA7	NPC2
ENSG00000124766	9.44211e-11	0.64854	0.785	0.742	3.45477e-06	0.043	SOX4	NPC2
ENSG00000034510	6.58607e-104	0.84616	0.988	0.946	2.40978e-99	0.042	TMSB10	NPC2
ENSG00000165502	1.4399e-61	0.296852	0.99	0.948	5.26844e-57	0.042	RPL36AL	NPC2
ENSG00000026025	1.91324e-145	0.275849	0.997	0.956	7.00036e-141	0.041	VIM	NPC2
ENSG00000114315	1.82944e-13	0.361829	0.394	0.354	6.69374e-09	0.04	HES1	NPC2
ENSG00000132475	2.28488e-17	0.341974	0.98	0.943	8.36014e-13	0.037	H3F3B	NPC2
ENSG00000167085	1.80038e-51	0.264008	0.953	0.916	6.5874e-47	0.037	PHB	NPC2
ENSG00000111669	4.93684e-108	0.370024	0.997	0.963	1.80634e-103	0.034	TPI1	NPC2
ENSG00000196230	2.48627e-161	0.389011	0.988	0.955	9.09701e-157	0.033	TUBB	NPC2
ENSG00000159199	5.4996e-97	0.282035	0.921	0.889	2.01225e-92	0.032	ATP5MC1	NPC2
ENSG00000140319	4.16373e-43	0.266061	0.995	0.964	1.52347e-38	0.031	SRP14	NPC2
ENSG00000136810	7.24963e-49	0.315916	0.984	0.955	2.65257e-44	0.029	TXN	NPC2
ENSG00000164032	1.78067e-122	0.312926	0.99	0.961	6.51528e-118	0.029	H2AFZ	NPC2
ENSG00000140264	6.599e-74	0.268656	0.997	0.97	2.41451e-69	0.027	SERF2	NPC2
ENSG00000154518	2.42702e-73	0.340412	0.974	0.947	8.88022e-69	0.027	ATP5MC3	NPC2
ENSG00000172757	2.17077e-64	0.259986	0.991	0.965	7.94264e-60	0.026	CFL1	NPC2
ENSG00000084207	8.15295e-114	0.33167	0.997	0.975	2.98308e-109	0.022	GSTP1	NPC2
ENSG00000167996	1.08477e-83	0.938277	0.998	0.977	3.96908e-79	0.021	FTH1	NPC2
ENSG00000123416	9.0036e-88	0.303615	0.973	0.953	3.29433e-83	0.02	TUBA1B	NPC2
ENSG00000106153	1.65254e-78	0.267942	0.996	0.979	6.04647e-74	0.017	CHCHD2	NPC2
ENSG00000117450	5.93747e-78	0.272496	0.966	0.949	2.17246e-73	0.017	PRDX1	NPC2
ENSG00000075624	4.50135e-53	0.359313	0.997	0.982	1.647e-48	0.015	ACTB	NPC2
ENSG00000115541	7.24593e-61	0.40477	0.98	0.968	2.65121e-56	0.012	HSPE1	NPC2
ENSG00000130513	6.94316e-17	0.262793	0.149	0.139	2.54043e-12	0.01	GDF15	NPC2
ENSG00000087086	2.76213e-20	0.414995	0.999	0.99	1.01064e-15	0.009	FTL	NPC2
ENSG00000111640	4.81999e-67	0.379468	0.999	0.993	1.76359e-62	0.006	GAPDH	NPC2
ENSG00000164687	3.63639e-34	0.274052	0.847	0.873	1.33052e-29	-0.026	FABP5	NPC2
ENSG00000243620	9.83872e-153	1.18018	0.777	0.413	3.59989e-148	0.364	AC092957.1	Unknown
ENSG00000183166	1.01206e-214	1.08176	0.872	0.526	3.70303e-210	0.346	CALN1	Unknown
ENSG00000126733	1.17483e-156	0.985749	0.798	0.462	4.29858e-152	0.336	DACH2	Unknown
ENSG00000253554	1.01913e-212	1.08838	0.869	0.534	3.72888e-208	0.335	LINC01414	Unknown
ENSG00000140470	1.13162e-195	0.944321	0.816	0.485	4.14048e-191	0.331	ADAMTS17	Unknown
ENSG00000286757	9.0395e-118	0.77998	0.699	0.375	3.30746e-113	0.324	AL137139.2	Unknown
ENSG00000088538	4.36305e-165	0.813473	0.812	0.489	1.5964e-160	0.323	DOCK3	Unknown
ENSG00000044524	2.99116e-190	0.941676	0.763	0.442	1.09444e-185	0.321	EPHA3	Unknown
ENSG00000182667	1.34017e-120	0.932572	0.686	0.366	4.90355e-116	0.32	NTM	Unknown
ENSG00000184613	1.08329e-100	0.699662	0.722	0.403	3.96367e-96	0.319	NELL2	Unknown
ENSG00000169862	2.90193e-138	0.893526	0.791	0.476	1.06179e-133	0.315	CTNND2	Unknown
ENSG00000124406	7.71957e-159	0.704797	0.765	0.455	2.82451e-154	0.31	ATP8A1	Unknown
ENSG00000172572	1.98243e-83	0.729558	0.59	0.283	7.2535e-79	0.307	PDE3A	Unknown
ENSG00000247809	6.7449e-88	0.697893	0.676	0.373	2.46789e-83	0.303	NR2F2-AS1	Unknown
ENSG00000117020	5.46534e-121	0.792378	0.833	0.531	1.99971e-116	0.302	AKT3	Unknown
ENSG00000152578	6.5394e-107	0.804517	0.697	0.398	2.3927e-102	0.299	GRIA4	Unknown
ENSG00000150471	5.48093e-194	0.97458	0.858	0.56	2.00542e-189	0.298	ADGRL3	Unknown
ENSG00000155974	3.62527e-164	0.790197	0.752	0.457	1.32645e-159	0.295	GRIP1	Unknown
ENSG00000172915	4.18323e-209	0.797884	0.792	0.497	1.5306e-204	0.295	NBEA	Unknown
ENSG00000137872	3.38408e-186	0.991971	0.822	0.529	1.2382e-181	0.293	SEMA6D	Unknown
ENSG00000165495	4.16556e-104	0.655944	0.606	0.313	1.52413e-99	0.293	PKNOX2	Unknown
ENSG00000171132	3.94595e-211	0.916371	0.778	0.485	1.44378e-206	0.293	PRKCE	Unknown
ENSG00000144278	1.14186e-203	0.999254	0.856	0.566	4.17796e-199	0.29	GALNT13	Unknown
ENSG00000261115	2.01729e-111	0.687337	0.696	0.407	7.38106e-107	0.289	TMEM178B	Unknown
ENSG00000085276	3.19747e-103	0.859661	0.716	0.428	1.16992e-98	0.288	MECOM	Unknown
ENSG00000138696	2.32932e-132	0.751754	0.757	0.47	8.52274e-128	0.287	BMPR1B	Unknown
ENSG00000120658	1.33383e-185	0.853509	0.804	0.518	4.88033e-181	0.286	ENOX1	Unknown
ENSG00000139220	5.23487e-79	0.599869	0.552	0.267	1.91539e-74	0.285	PPFIA2	Unknown
ENSG00000091656	4.11046e-122	0.721809	0.731	0.448	1.50398e-117	0.283	ZFHX4	Unknown
ENSG00000198795	7.5105e-128	0.759366	0.756	0.473	2.74802e-123	0.283	ZNF521	Unknown
ENSG00000198879	4.23407e-152	0.726733	0.666	0.383	1.5492e-147	0.283	SFMBT2	Unknown
ENSG00000145147	1.45744e-148	0.838198	0.769	0.487	5.33264e-144	0.282	SLIT2	Unknown
ENSG00000080298	3.86805e-159	0.721236	0.765	0.486	1.41528e-154	0.279	RFX3	Unknown
ENSG00000106278	4.21619e-71	0.534448	0.554	0.276	1.54266e-66	0.278	PTPRZ1	Unknown
ENSG00000152270	2.21216e-159	0.809446	0.817	0.539	8.09407e-155	0.278	PDE3B	Unknown
ENSG00000173157	8.60858e-161	0.727951	0.676	0.398	3.14979e-156	0.278	ADAMTS20	Unknown
ENSG00000196782	6.4194e-198	0.910246	0.876	0.599	2.3488e-193	0.277	MAML3	Unknown
ENSG00000134775	1.11459e-145	0.731716	0.782	0.506	4.07816e-141	0.276	FHOD3	Unknown
ENSG00000175198	6.94616e-113	0.586585	0.794	0.521	2.54153e-108	0.273	PCCA	Unknown
ENSG00000150625	1.16806e-72	0.675615	0.714	0.442	4.27381e-68	0.272	GPM6A	Unknown
ENSG00000153956	3.66533e-111	0.72628	0.811	0.539	1.34111e-106	0.272	CACNA2D1	Unknown
ENSG00000154240	1.14405e-161	0.750276	0.774	0.502	4.18598e-157	0.272	CEP112	Unknown
ENSG00000058091	7.38084e-105	0.646022	0.722	0.452	2.70058e-100	0.27	CDK14	Unknown
ENSG00000101680	8.84412e-96	0.587509	0.653	0.384	3.23597e-91	0.269	LAMA1	Unknown
ENSG00000151322	3.56031e-93	0.711374	0.622	0.353	1.30268e-88	0.269	NPAS3	Unknown
ENSG00000183783	1.13697e-91	0.629173	0.526	0.259	4.16005e-87	0.267	KCTD8	Unknown
ENSG00000116117	4.0457e-159	0.722915	0.693	0.427	1.48028e-154	0.266	PARD3B	Unknown
ENSG00000143995	6.84159e-83	0.57845	0.627	0.361	2.50327e-78	0.266	MEIS1	Unknown
ENSG00000196376	5.48285e-121	0.683377	0.692	0.427	2.00612e-116	0.265	SLC35F1	Unknown
ENSG00000148516	1.53035e-140	0.724929	0.773	0.509	5.59941e-136	0.264	ZEB1	Unknown
ENSG00000148408	2.62459e-111	0.705202	0.565	0.302	9.60312e-107	0.263	CACNA1B	Unknown
ENSG00000068024	3.27228e-123	0.581274	0.622	0.362	1.1973e-118	0.26	HDAC4	Unknown
ENSG00000079102	1.17871e-71	0.603263	0.641	0.381	4.31277e-67	0.26	RUNX1T1	Unknown
ENSG00000164684	1.44091e-54	0.479658	0.567	0.307	5.27216e-50	0.26	ZNF704	Unknown
ENSG00000178568	2.41494e-165	1.06872	0.813	0.553	8.83603e-161	0.26	ERBB4	Unknown
ENSG00000185760	1.47785e-249	1.12183	0.854	0.595	5.40729e-245	0.259	KCNQ5	Unknown
ENSG00000267313	5.67181e-173	0.689202	0.778	0.519	2.07526e-168	0.259	AC021504.1	Unknown
ENSG00000145362	5.03723e-204	0.943266	0.839	0.581	1.84307e-199	0.258	ANK2	Unknown
ENSG00000181827	3.89861e-178	0.71205	0.743	0.486	1.42646e-173	0.257	RFX7	Unknown
ENSG00000141384	6.02419e-142	0.641685	0.699	0.443	2.20419e-137	0.256	TAF4B	Unknown
ENSG00000151136	3.54019e-76	0.574391	0.489	0.233	1.29532e-71	0.256	BTBD11	Unknown
ENSG00000151789	9.41815e-46	0.569579	0.594	0.338	3.44601e-41	0.256	ZNF385D	Unknown
ENSG00000172985	4.65083e-125	0.61142	0.573	0.319	1.70169e-120	0.254	SH3RF3	Unknown
ENSG00000154864	3.54459e-111	0.784247	0.631	0.378	1.29693e-106	0.253	PIEZO2	Unknown
ENSG00000165238	1.32457e-97	0.510589	0.624	0.372	4.84646e-93	0.252	WNK2	Unknown
ENSG00000102763	2.63846e-190	0.717541	0.735	0.484	9.65386e-186	0.251	VWA8	Unknown
ENSG00000140443	2.31823e-195	0.797297	0.84	0.589	8.48216e-191	0.251	IGF1R	Unknown
ENSG00000162599	1.47597e-212	1.01481	0.937	0.686	5.40043e-208	0.251	NFIA	Unknown
ENSG00000169744	3.19907e-125	0.59368	0.594	0.344	1.17051e-120	0.25	LDB2	Unknown
ENSG00000215386	4.23001e-170	0.942647	0.876	0.627	1.54772e-165	0.249	MIR99AHG	Unknown
ENSG00000139173	1.00328e-148	0.611769	0.629	0.381	3.67089e-144	0.248	TMEM117	Unknown
ENSG00000172264	1.73935e-147	0.826703	0.751	0.503	6.36412e-143	0.248	MACROD2	Unknown
ENSG00000134909	3.0636e-130	0.576956	0.691	0.444	1.12094e-125	0.247	ARHGAP32	Unknown
ENSG00000152977	2.20922e-13	0.437937	0.739	0.493	8.08333e-09	0.246	ZIC1	Unknown
ENSG00000153944	3.04083e-235	0.921142	0.923	0.677	1.11261e-230	0.246	MSI2	Unknown
ENSG00000157423	8.87175e-75	0.425562	0.465	0.219	3.24608e-70	0.246	HYDIN	Unknown
ENSG00000196220	6.89522e-52	0.485559	0.579	0.333	2.52289e-47	0.246	SRGAP3	Unknown
ENSG00000165379	5.06797e-107	0.65397	0.546	0.301	1.85432e-102	0.245	LRFN5	Unknown
ENSG00000198846	2.55421e-82	0.610665	0.554	0.309	9.34559e-78	0.245	TOX	Unknown
ENSG00000145375	8.04827e-140	0.639175	0.67	0.426	2.94478e-135	0.244	SPATA5	Unknown
ENSG00000151240	2.07485e-183	0.692052	0.731	0.489	7.59165e-179	0.242	DIP2C	Unknown
ENSG00000243716	2.45227e-143	0.549378	0.521	0.279	8.97262e-139	0.242	NPIPB5	Unknown
ENSG00000170396	2.43111e-76	0.678119	0.584	0.343	8.89519e-72	0.241	ZNF804A	Unknown
ENSG00000115252	1.81183e-45	0.677338	0.541	0.301	6.6293e-41	0.24	PDE1A	Unknown
ENSG00000119522	1.1756e-201	0.792361	0.815	0.575	4.3014e-197	0.24	DENND1A	Unknown
ENSG00000133083	3.75787e-67	0.527557	0.565	0.325	1.37497e-62	0.24	DCLK1	Unknown
ENSG00000152990	6.78487e-190	0.730164	0.736	0.496	2.48252e-185	0.24	ADGRA3	Unknown
ENSG00000157540	1.36352e-105	0.513619	0.662	0.423	4.989e-101	0.239	DYRK1A	Unknown
ENSG00000173588	1.68742e-166	0.624484	0.742	0.503	6.1741e-162	0.239	CEP83	Unknown
ENSG00000033122	1.8729e-83	0.801718	0.636	0.398	6.85277e-79	0.238	LRRC7	Unknown
ENSG00000117569	3.60622e-146	0.635546	0.79	0.552	1.31948e-141	0.238	PTBP2	Unknown
ENSG00000164199	9.51357e-86	0.633027	0.632	0.394	3.48092e-81	0.238	ADGRV1	Unknown
ENSG00000175600	1.62918e-162	0.654444	0.637	0.399	5.96101e-158	0.238	SUGCT	Unknown
ENSG00000182185	1.02007e-215	0.888136	0.827	0.589	3.73233e-211	0.238	RAD51B	Unknown
ENSG00000218336	0	1.34051	0.982	0.744	0	0.238	TENM3	Unknown
ENSG00000007372	6.40851e-07	0.368565	0.642	0.405	0.0234481	0.237	PAX6	Unknown
ENSG00000101849	1.72765e-147	0.672069	0.753	0.516	6.3213e-143	0.237	TBL1X	Unknown
ENSG00000152127	3.78861e-149	0.663148	0.658	0.422	1.38622e-144	0.236	MGAT5	Unknown
ENSG00000184178	2.86889e-188	0.709526	0.722	0.486	1.0497e-183	0.236	SCFD2	Unknown
ENSG00000112319	3.06388e-116	0.871294	0.573	0.338	1.12104e-111	0.235	EYA4	Unknown
ENSG00000149256	1.57346e-123	0.579928	0.583	0.348	5.75715e-119	0.235	TENM4	Unknown
ENSG00000101746	2.97281e-54	0.416557	0.468	0.234	1.08772e-49	0.234	NOL4	Unknown
ENSG00000130413	1.77616e-120	0.559598	0.667	0.433	6.49877e-116	0.234	STK33	Unknown
ENSG00000137478	1.68667e-144	0.626508	0.773	0.539	6.17137e-140	0.234	FCHSD2	Unknown
ENSG00000121988	1.07418e-143	0.638935	0.726	0.494	3.93032e-139	0.232	ZRANB3	Unknown
ENSG00000152520	6.20359e-139	0.53675	0.697	0.465	2.26983e-134	0.232	PAN3	Unknown
ENSG00000168675	3.02916e-33	0.638686	0.522	0.291	1.10834e-28	0.231	LDLRAD4	Unknown
ENSG00000151276	0	1.0244	0.935	0.705	0	0.23	MAGI1	Unknown
ENSG00000175175	3.73905e-130	0.739377	0.704	0.474	1.36808e-125	0.23	PPM1E	Unknown
ENSG00000205213	3.5992e-53	0.492548	0.546	0.316	1.31691e-48	0.23	LGR4	Unknown
ENSG00000100154	8.37756e-264	1.07236	0.911	0.682	3.06527e-259	0.229	TTC28	Unknown
ENSG00000151490	1.29005e-67	0.506474	0.482	0.253	4.72016e-63	0.229	PTPRO	Unknown
ENSG00000230606	3.66237e-90	0.433579	0.533	0.304	1.34003e-85	0.229	AC092683.1	Unknown
ENSG00000141564	6.97804e-166	0.592867	0.64	0.412	2.5532e-161	0.228	RPTOR	Unknown
ENSG00000106070	2.01826e-126	0.560912	0.687	0.46	7.38461e-122	0.227	GRB10	Unknown
ENSG00000124496	1.75252e-115	0.519398	0.599	0.372	6.41231e-111	0.227	TRERF1	Unknown
ENSG00000143340	4.73511e-74	0.412332	0.422	0.195	1.73253e-69	0.227	FAM163A	Unknown
ENSG00000232931	4.86466e-72	0.406226	0.517	0.29	1.77993e-67	0.227	LINC00342	Unknown
ENSG00000237187	3.09483e-80	0.498169	0.581	0.355	1.13237e-75	0.226	NR2F1-AS1	Unknown
ENSG00000114805	9.29482e-89	0.475826	0.516	0.291	3.40088e-84	0.225	PLCH1	Unknown
ENSG00000259692	1.82571e-188	0.743387	0.852	0.627	6.68008e-184	0.225	AC104041.1	Unknown
ENSG00000081803	1.58983e-57	0.431608	0.572	0.348	5.81703e-53	0.224	CADPS2	Unknown
ENSG00000083067	7.90624e-69	0.997276	0.551	0.327	2.89281e-64	0.224	TRPM3	Unknown
ENSG00000123106	5.82458e-103	0.521106	0.664	0.44	2.13116e-98	0.224	CCDC91	Unknown
ENSG00000135049	1.54117e-144	0.635876	0.762	0.538	5.63899e-140	0.224	AGTPBP1	Unknown
ENSG00000147642	1.88458e-55	0.496807	0.503	0.279	6.89549e-51	0.224	SYBU	Unknown
ENSG00000009335	2.9387e-183	0.71912	0.786	0.563	1.07524e-178	0.223	UBE3C	Unknown
ENSG00000138759	4.64776e-155	0.676549	0.63	0.407	1.70057e-150	0.223	FRAS1	Unknown
ENSG00000143919	3.48676e-234	0.893664	0.863	0.64	1.27577e-229	0.223	CAMKMT	Unknown
ENSG00000153157	4.89591e-142	0.540992	0.563	0.34	1.79137e-137	0.223	SYCP2L	Unknown
ENSG00000172159	6.3075e-70	0.490782	0.502	0.279	2.30785e-65	0.223	FRMD3	Unknown
ENSG00000118420	7.89716e-130	0.552713	0.686	0.464	2.88949e-125	0.222	UBE3D	Unknown
ENSG00000144724	1.68074e-191	0.880244	0.783	0.561	6.14966e-187	0.222	PTPRG	Unknown
ENSG00000179241	8.89819e-125	0.591855	0.657	0.435	3.25576e-120	0.222	LDLRAD3	Unknown
ENSG00000184156	5.38872e-64	0.653998	0.447	0.225	1.97168e-59	0.222	KCNQ3	Unknown
ENSG00000078403	6.35114e-195	0.737426	0.834	0.613	2.32382e-190	0.221	MLLT10	Unknown
ENSG00000131558	1.91198e-210	0.752202	0.861	0.64	6.99576e-206	0.221	EXOC4	Unknown
ENSG00000148737	2.1862e-79	0.579163	0.707	0.486	7.99908e-75	0.221	TCF7L2	Unknown
ENSG00000143776	9.02265e-177	0.684439	0.726	0.506	3.3013e-172	0.22	CDC42BPA	Unknown
ENSG00000163629	3.2703e-129	0.545751	0.662	0.442	1.19657e-124	0.22	PTPN13	Unknown
ENSG00000175745	5.68176e-37	0.522549	0.776	0.556	2.0789e-32	0.22	NR2F1	Unknown
ENSG00000189079	5.54474e-120	0.546303	0.67	0.45	2.02877e-115	0.22	ARID2	Unknown
ENSG00000115970	5.48809e-143	0.581276	0.671	0.453	2.00804e-138	0.218	THADA	Unknown
ENSG00000178445	8.72162e-80	0.45361	0.607	0.389	3.19115e-75	0.218	GLDC	Unknown
ENSG00000146414	8.68703e-122	0.538319	0.702	0.485	3.1785e-117	0.217	SHPRH	Unknown
ENSG00000173482	1.39266e-125	0.631734	0.607	0.39	5.0956e-121	0.217	PTPRM	Unknown
ENSG00000276644	1.04935e-35	0.521022	0.596	0.379	3.83945e-31	0.217	DACH1	Unknown
ENSG00000099954	1.86654e-74	0.493302	0.678	0.462	6.82949e-70	0.216	CECR2	Unknown
ENSG00000111962	1.73694e-83	0.503928	0.544	0.328	6.3553e-79	0.216	UST	Unknown
ENSG00000143951	4.88882e-102	0.506287	0.629	0.413	1.78877e-97	0.216	WDPCP	Unknown
ENSG00000156103	4.25258e-112	0.529577	0.564	0.348	1.55598e-107	0.216	MMP16	Unknown
ENSG00000163590	2.14415e-137	0.798808	0.722	0.506	7.84524e-133	0.216	PPM1L	Unknown
ENSG00000170085	4.94732e-131	0.617314	0.759	0.543	1.81017e-126	0.216	SIMC1	Unknown
ENSG00000184005	2.07051e-152	0.811476	0.622	0.406	7.5758e-148	0.216	ST6GALNAC3	Unknown
ENSG00000177565	4.6833e-158	0.640129	0.803	0.589	1.71357e-153	0.214	TBL1XR1	Unknown
ENSG00000049618	4.09733e-197	0.7805	0.866	0.653	1.49917e-192	0.213	ARID1B	Unknown
ENSG00000104313	3.15232e-79	0.723709	0.502	0.289	1.1534e-74	0.213	EYA1	Unknown
ENSG00000115504	6.45459e-112	0.56807	0.791	0.578	2.36167e-107	0.213	EHBP1	Unknown
ENSG00000123066	1.23843e-169	0.672623	0.769	0.556	4.53129e-165	0.213	MED13L	Unknown
ENSG00000165392	7.03353e-127	0.570804	0.732	0.519	2.5735e-122	0.213	WRN	Unknown
ENSG00000187672	4.14684e-79	0.492057	0.559	0.346	1.51729e-74	0.213	ERC2	Unknown
ENSG00000127928	3.15454e-84	0.586273	0.648	0.436	1.15422e-79	0.212	GNGT1	Unknown
ENSG00000144535	6.4494e-137	0.533602	0.609	0.397	2.35977e-132	0.212	DIS3L2	Unknown
ENSG00000150938	4.12894e-87	0.439948	0.533	0.321	1.51074e-82	0.212	CRIM1	Unknown
ENSG00000158528	1.88772e-129	0.558561	0.647	0.435	6.90698e-125	0.212	PPP1R9A	Unknown
ENSG00000164742	1.21234e-64	0.427692	0.495	0.283	4.43583e-60	0.212	ADCY1	Unknown
ENSG00000187240	3.93697e-222	0.843603	0.85	0.638	1.4405e-217	0.212	DYNC2H1	Unknown
ENSG00000154822	5.40171e-66	0.411927	0.518	0.307	1.97643e-61	0.211	PLCL2	Unknown
ENSG00000163630	1.49785e-65	0.525348	0.383	0.172	5.48049e-61	0.211	SYNPR	Unknown
ENSG00000169918	6.76587e-94	0.477712	0.531	0.321	2.47556e-89	0.21	OTUD7A	Unknown
ENSG00000138640	2.47246e-177	0.659875	0.852	0.643	9.04647e-173	0.209	FAM13A	Unknown
ENSG00000144036	2.43157e-132	0.495913	0.643	0.434	8.89688e-128	0.209	EXOC6B	Unknown
ENSG00000151474	1.29944e-58	0.422402	0.592	0.383	4.75452e-54	0.209	FRMD4A	Unknown
ENSG00000184305	9.80478e-95	0.462643	0.699	0.49	3.58747e-90	0.209	CCSER1	Unknown
ENSG00000185345	6.89066e-84	0.471376	0.509	0.3	2.52122e-79	0.209	PRKN	Unknown
ENSG00000259240	2.02493e-80	0.472213	0.518	0.309	7.40902e-76	0.209	MIR4713HG	Unknown
ENSG00000059588	5.27252e-96	0.473802	0.611	0.403	1.92916e-91	0.208	TARBP1	Unknown
ENSG00000114948	3.72306e-96	0.469575	0.537	0.329	1.36223e-91	0.208	ADAM23	Unknown
ENSG00000120071	5.35419e-165	0.644589	0.755	0.547	1.95904e-160	0.208	KANSL1	Unknown
ENSG00000156687	4.72246e-105	0.597606	0.596	0.388	1.7279e-100	0.208	UNC5D	Unknown
ENSG00000196628	3.9715e-103	0.690892	0.833	0.625	1.45313e-98	0.208	TCF4	Unknown
ENSG00000079215	7.04413e-93	0.461119	0.606	0.399	2.57738e-88	0.207	SLC1A3	Unknown
ENSG00000083535	1.05947e-121	0.562334	0.754	0.547	3.87649e-117	0.207	PIBF1	Unknown
ENSG00000107104	3.2999e-155	0.641488	0.727	0.52	1.2074e-150	0.207	KANK1	Unknown
ENSG00000109265	9.36015e-97	0.52003	0.634	0.427	3.42479e-92	0.207	KIAA1211	Unknown
ENSG00000138101	5.68243e-155	0.608531	0.729	0.523	2.07915e-150	0.206	DTNB	Unknown
ENSG00000139292	4.06309e-48	0.377807	0.441	0.235	1.48665e-43	0.206	LGR5	Unknown
ENSG00000164808	1.11424e-199	0.750787	0.871	0.665	4.0769e-195	0.206	SPIDR	Unknown
ENSG00000170558	5.38255e-74	0.495985	0.763	0.557	1.96942e-69	0.206	CDH2	Unknown
ENSG00000175054	1.57111e-105	0.490411	0.599	0.393	5.74855e-101	0.206	ATR	Unknown
ENSG00000206560	5.78544e-122	0.553139	0.697	0.491	2.11683e-117	0.206	ANKRD28	Unknown
ENSG00000054611	1.36963e-141	0.506537	0.654	0.449	5.01135e-137	0.205	TBC1D22A	Unknown
ENSG00000085511	2.58513e-94	0.458852	0.626	0.421	9.45874e-90	0.205	MAP3K4	Unknown
ENSG00000145743	9.19796e-140	0.568365	0.634	0.429	3.36544e-135	0.205	FBXL17	Unknown
ENSG00000151338	4.91479e-172	0.644906	0.688	0.483	1.79827e-167	0.205	MIPOL1	Unknown
ENSG00000249413	6.20688e-69	0.457319	0.561	0.356	2.27103e-64	0.205	AC116049.2	Unknown
ENSG00000113805	1.92879e-42	0.362843	0.376	0.172	7.05724e-38	0.204	CNTN3	Unknown
ENSG00000151952	2.58807e-51	0.727778	0.441	0.237	9.46947e-47	0.204	TMEM132D	Unknown
ENSG00000176771	2.5641e-41	0.393294	0.483	0.279	9.38178e-37	0.204	NCKAP5	Unknown
ENSG00000183826	3.32678e-102	0.512925	0.599	0.395	1.21724e-97	0.204	BTBD9	Unknown
ENSG00000121440	1.14074e-139	0.65207	0.698	0.495	4.17386e-135	0.203	PDZRN3	Unknown
ENSG00000125257	2.17093e-145	0.627971	0.654	0.451	7.94322e-141	0.203	ABCC4	Unknown
ENSG00000170579	6.35371e-302	1.13529	0.95	0.747	2.32476e-297	0.203	DLGAP1	Unknown
ENSG00000165323	3.1172e-52	0.440844	0.424	0.222	1.14055e-47	0.202	FAT3	Unknown
ENSG00000189229	5.63518e-136	0.656933	0.816	0.614	2.06185e-131	0.202	AC069277.1	Unknown
ENSG00000226383	1.66903e-131	0.559666	0.687	0.485	6.1068e-127	0.202	LINC01876	Unknown
ENSG00000132549	1.02992e-170	0.644073	0.644	0.443	3.76837e-166	0.201	VPS13B	Unknown
ENSG00000227345	2.1086e-130	0.522417	0.706	0.505	7.71516e-126	0.201	PARG	Unknown
ENSG00000131323	7.1295e-109	0.495074	0.646	0.446	2.60861e-104	0.2	TRAF3	Unknown
ENSG00000196284	4.11792e-201	0.72187	0.807	0.607	1.50671e-196	0.2	SUPT3H	Unknown
ENSG00000215421	2.67231e-112	0.476076	0.489	0.289	9.77772e-108	0.2	ZNF407	Unknown
ENSG00000228065	3.99341e-140	0.794954	0.679	0.479	1.46115e-135	0.2	LINC01515	Unknown
ENSG00000237515	2.41822e-41	0.534161	0.457	0.257	8.84804e-37	0.2	SHISA9	Unknown
ENSG00000100731	1.59849e-123	0.503252	0.557	0.358	5.84872e-119	0.199	PCNX1	Unknown
ENSG00000115904	2.04862e-147	0.567512	0.732	0.533	7.4957e-143	0.199	SOS1	Unknown
ENSG00000286214	2.43016e-62	0.394618	0.381	0.182	8.89171e-58	0.199	AUXG01000058.1	Unknown
ENSG00000066084	1.60334e-116	0.495063	0.609	0.411	5.86647e-112	0.198	DIP2B	Unknown
ENSG00000081913	1.00649e-77	0.432008	0.572	0.374	3.68263e-73	0.198	PHLPP1	Unknown
ENSG00000101868	1.79468e-98	0.672758	0.692	0.494	6.56655e-94	0.198	POLA1	Unknown
ENSG00000226419	2.19595e-121	0.561932	0.702	0.504	8.03478e-117	0.198	SLC16A1-AS1	Unknown
ENSG00000010803	4.26126e-162	0.704214	0.874	0.677	1.55915e-157	0.197	SCMH1	Unknown
ENSG00000088179	9.99215e-101	0.483792	0.605	0.408	3.65603e-96	0.197	PTPN4	Unknown
ENSG00000110328	3.28194e-196	0.833815	0.829	0.632	1.20083e-191	0.197	GALNT18	Unknown
ENSG00000171004	6.60233e-202	0.802087	0.853	0.656	2.41573e-197	0.197	HS6ST2	Unknown
ENSG00000065883	3.02199e-113	0.473124	0.661	0.465	1.10572e-108	0.196	CDK13	Unknown
ENSG00000073849	2.94667e-98	0.468787	0.544	0.348	1.07816e-93	0.196	ST6GAL1	Unknown
ENSG00000104517	3.3243e-136	0.545269	0.691	0.495	1.21633e-131	0.196	UBR5	Unknown
ENSG00000165675	2.12703e-66	0.452652	0.5	0.304	7.7826e-62	0.196	ENOX2	Unknown
ENSG00000182957	2.85318e-62	0.380427	0.519	0.323	1.04395e-57	0.196	SPATA13	Unknown
ENSG00000064309	8.78875e-60	0.431827	0.47	0.275	3.21571e-55	0.195	CDON	Unknown
ENSG00000144681	2.59822e-47	0.387192	0.481	0.286	9.50664e-43	0.195	STAC	Unknown
ENSG00000167081	7.79541e-98	0.617915	0.649	0.454	2.85226e-93	0.195	PBX3	Unknown
ENSG00000171316	7.97605e-79	0.499823	0.759	0.564	2.91836e-74	0.195	CHD7	Unknown
ENSG00000185532	8.48703e-159	0.865564	0.649	0.454	3.10532e-154	0.195	PRKG1	Unknown
ENSG00000281566	1.88055e-163	0.753493	0.791	0.596	6.88073e-159	0.195	AL157778.1	Unknown
ENSG00000081479	4.51759e-57	0.438923	0.49	0.296	1.65294e-52	0.194	LRP2	Unknown
ENSG00000112159	1.37535e-155	0.677334	0.812	0.618	5.03227e-151	0.194	MDN1	Unknown
ENSG00000147862	3.71777e-103	0.636944	0.864	0.67	1.36029e-98	0.194	NFIB	Unknown
ENSG00000154743	1.3865e-103	0.443562	0.563	0.369	5.07306e-99	0.194	TSEN2	Unknown
ENSG00000157654	2.45935e-133	0.560563	0.692	0.498	8.99853e-129	0.194	PALM2-AKAP2	Unknown
ENSG00000157985	2.06654e-220	0.841946	0.889	0.695	7.56127e-216	0.194	AGAP1	Unknown
ENSG00000245526	4.08177e-27	0.529788	0.426	0.232	1.49348e-22	0.194	LINC00461	Unknown
ENSG00000100505	4.73827e-70	0.4388	0.586	0.393	1.73369e-65	0.193	TRIM9	Unknown
ENSG00000102595	8.14012e-162	0.583379	0.652	0.459	2.97839e-157	0.193	UGGT2	Unknown
ENSG00000118965	9.85961e-89	0.475718	0.666	0.473	3.60753e-84	0.193	WDR35	Unknown
ENSG00000140948	8.91132e-80	0.380311	0.502	0.309	3.26056e-75	0.193	ZCCHC14	Unknown
ENSG00000145996	3.41996e-153	0.700584	0.828	0.635	1.25133e-148	0.193	CDKAL1	Unknown
ENSG00000174963	8.186e-06	0.301695	0.551	0.358	0.299518	0.193	ZIC4	Unknown
ENSG00000249859	4.44531e-228	0.877076	0.884	0.691	1.62649e-223	0.193	PVT1	Unknown
ENSG00000073417	1.16023e-101	0.509539	0.678	0.486	4.24515e-97	0.192	PDE8A	Unknown
ENSG00000106617	9.69353e-53	0.324612	0.437	0.245	3.54677e-48	0.192	PRKAG2	Unknown
ENSG00000136231	1.80429e-151	0.662432	0.841	0.649	6.60172e-147	0.192	IGF2BP3	Unknown
ENSG00000144455	1.73862e-153	0.588592	0.696	0.504	6.36144e-149	0.192	SUMF1	Unknown
ENSG00000162104	1.12004e-78	0.41912	0.475	0.283	4.09813e-74	0.192	ADCY9	Unknown
ENSG00000185305	4.97162e-130	0.498642	0.603	0.411	1.81907e-125	0.192	ARL15	Unknown
ENSG00000198589	0	0.91298	0.934	0.742	0	0.192	LRBA	Unknown
ENSG00000121210	9.92775e-93	0.47376	0.563	0.372	3.63247e-88	0.191	TMEM131L	Unknown
ENSG00000198648	3.65475e-83	0.440115	0.591	0.4	1.33723e-78	0.191	STK39	Unknown
ENSG00000162687	1.21583e-108	0.539989	0.579	0.389	4.44859e-104	0.19	KCNT2	Unknown
ENSG00000064999	2.91327e-90	0.408868	0.553	0.364	1.06594e-85	0.189	ANKS1A	Unknown
ENSG00000089123	9.80005e-134	0.490496	0.604	0.415	3.58574e-129	0.189	TASP1	Unknown
ENSG00000124789	5.26756e-105	0.481254	0.647	0.458	1.92735e-100	0.189	NUP153	Unknown
ENSG00000169554	6.60559e-83	0.467137	0.468	0.279	2.41692e-78	0.189	ZEB2	Unknown
ENSG00000221823	6.40968e-89	0.449862	0.632	0.443	2.34524e-84	0.189	PPP3R1	Unknown
ENSG00000074054	2.00438e-93	0.449626	0.594	0.406	7.33383e-89	0.188	CLASP1	Unknown
ENSG00000109911	4.38302e-93	0.455702	0.582	0.394	1.6037e-88	0.188	ELP4	Unknown
ENSG00000119509	6.68822e-113	0.482567	0.606	0.418	2.44715e-108	0.188	INVS	Unknown
ENSG00000171587	3.60645e-45	0.438447	0.417	0.229	1.31956e-40	0.188	DSCAM	Unknown
ENSG00000175928	1.20392e-37	0.371505	0.579	0.391	4.40501e-33	0.188	LRRN1	Unknown
ENSG00000137513	3.67074e-118	0.504431	0.683	0.496	1.34309e-113	0.187	NARS2	Unknown
ENSG00000157827	7.63777e-216	0.85117	0.917	0.73	2.79458e-211	0.187	FMNL2	Unknown
ENSG00000171105	2.42467e-43	0.339725	0.528	0.341	8.87163e-39	0.187	INSR	Unknown
ENSG00000077097	8.43848e-66	0.392649	0.687	0.501	3.08756e-61	0.186	TOP2B	Unknown
ENSG00000107669	1.02503e-82	0.416408	0.653	0.467	3.75049e-78	0.186	ATE1	Unknown
ENSG00000109762	7.12617e-95	0.441013	0.532	0.346	2.6074e-90	0.186	SNX25	Unknown
ENSG00000129595	2.96373e-38	0.338942	0.387	0.201	1.0844e-33	0.186	EPB41L4A	Unknown
ENSG00000156011	3.93387e-146	0.74999	0.849	0.663	1.43937e-141	0.186	PSD3	Unknown
ENSG00000157106	4.854e-215	0.807498	0.886	0.7	1.77603e-210	0.186	SMG1	Unknown
ENSG00000091127	3.68729e-126	0.583139	0.829	0.644	1.34914e-121	0.185	PUS7	Unknown
ENSG00000135976	2.5998e-112	0.414978	0.472	0.287	9.51239e-108	0.185	ANKRD36	Unknown
ENSG00000058453	4.56387e-65	0.411898	0.612	0.428	1.66987e-60	0.184	CROCC	Unknown
ENSG00000114861	3.53318e-173	0.67525	0.844	0.66	1.29276e-168	0.184	FOXP1	Unknown
ENSG00000148090	2.8679e-65	0.362265	0.507	0.323	1.04934e-60	0.184	AUH	Unknown
ENSG00000148200	6.40664e-137	0.615998	0.739	0.555	2.34412e-132	0.184	NR6A1	Unknown
ENSG00000155313	4.12008e-124	0.544893	0.632	0.448	1.5075e-119	0.184	USP25	Unknown
ENSG00000173273	1.67337e-107	0.466065	0.632	0.448	6.12269e-103	0.184	TNKS	Unknown
ENSG00000116127	2.56171e-67	0.379436	0.52	0.337	9.37304e-63	0.183	ALMS1	Unknown
ENSG00000093217	9.0974e-55	0.356703	0.552	0.37	3.32865e-50	0.182	XYLB	Unknown
ENSG00000109685	4.61636e-87	0.528864	0.795	0.613	1.68908e-82	0.182	NSD2	Unknown
ENSG00000119866	1.88304e-58	0.417577	0.582	0.4	6.88985e-54	0.182	BCL11A	Unknown
ENSG00000147905	1.50198e-169	0.69232	0.818	0.636	5.49561e-165	0.182	ZCCHC7	Unknown
ENSG00000060709	4.83502e-81	0.333471	0.354	0.173	1.76909e-76	0.181	RIMBP2	Unknown
ENSG00000078687	4.14425e-76	0.411328	0.539	0.358	1.51634e-71	0.181	TNRC6C	Unknown
ENSG00000083168	2.60684e-85	0.447418	0.652	0.471	9.53819e-81	0.181	KAT6A	Unknown
ENSG00000087116	8.149e-48	0.304855	0.423	0.242	2.98164e-43	0.181	ADAMTS2	Unknown
ENSG00000119547	2.53055e-27	0.420699	0.394	0.213	9.25902e-23	0.181	ONECUT2	Unknown
ENSG00000136111	2.64214e-128	0.580139	0.689	0.508	9.66734e-124	0.181	TBC1D4	Unknown
ENSG00000038382	6.16806e-176	0.648348	0.79	0.61	2.25683e-171	0.18	TRIO	Unknown
ENSG00000132964	1.96462e-95	0.445746	0.592	0.412	7.18835e-91	0.18	CDK8	Unknown
ENSG00000137764	7.35211e-70	0.374439	0.501	0.321	2.69007e-65	0.18	MAP2K5	Unknown
ENSG00000157851	1.97051e-32	0.346369	0.528	0.348	7.2099e-28	0.18	DPYSL5	Unknown
ENSG00000158966	6.26318e-72	0.388435	0.511	0.331	2.29163e-67	0.18	CACHD1	Unknown
ENSG00000163539	8.76827e-118	0.508699	0.686	0.506	3.20822e-113	0.18	CLASP2	Unknown
ENSG00000164327	8.02618e-69	0.311337	0.47	0.29	2.9367e-64	0.18	RICTOR	Unknown
ENSG00000164362	1.14545e-60	0.373097	0.493	0.313	4.19108e-56	0.18	TERT	Unknown
ENSG00000171723	0	1.08052	0.976	0.796	0	0.18	GPHN	Unknown
ENSG00000225465	2.86194e-75	0.361521	0.462	0.282	1.04716e-70	0.18	RFPL1S	Unknown
ENSG00000237877	4.43816e-114	0.461781	0.475	0.295	1.62388e-109	0.18	LINC01473	Unknown
ENSG00000047662	2.00905e-54	0.356933	0.513	0.334	7.35091e-50	0.179	FAM184B	Unknown
ENSG00000108100	2.88656e-162	0.629868	0.845	0.666	1.05616e-157	0.179	CCNY	Unknown
ENSG00000139746	5.24743e-145	0.573324	0.772	0.593	1.91998e-140	0.179	RBM26	Unknown
ENSG00000151229	4.6755e-86	0.438619	0.513	0.334	1.71072e-81	0.179	SLC2A13	Unknown
ENSG00000151413	3.18713e-107	0.461873	0.535	0.356	1.16614e-102	0.179	NUBPL	Unknown
ENSG00000158816	1.17355e-38	0.278639	0.333	0.154	4.29391e-34	0.179	VWA5B1	Unknown
ENSG00000188883	1.41425e-69	0.340729	0.403	0.224	5.17461e-65	0.179	KLRG2	Unknown
ENSG00000056487	6.69525e-42	0.352869	0.504	0.326	2.44973e-37	0.178	PHF21B	Unknown
ENSG00000077264	1.5401e-25	0.381521	0.396	0.218	5.63508e-21	0.178	PAK3	Unknown
ENSG00000091428	1.19295e-37	0.274239	0.351	0.173	4.36487e-33	0.178	RAPGEF4	Unknown
ENSG00000134030	2.55535e-115	0.475445	0.46	0.282	9.34978e-111	0.178	CTIF	Unknown
ENSG00000152894	3.57054e-145	0.500675	0.743	0.565	1.30642e-140	0.178	PTPRK	Unknown
ENSG00000158987	9.2271e-109	0.456739	0.667	0.489	3.3761e-104	0.178	RAPGEF6	Unknown
ENSG00000198815	1.12622e-96	0.46017	0.711	0.533	4.12074e-92	0.178	FOXJ3	Unknown
ENSG00000245248	1.1576e-81	0.387131	0.496	0.318	4.23554e-77	0.178	USP2-AS1	Unknown
ENSG00000100784	5.07213e-42	0.31623	0.427	0.25	1.85584e-37	0.177	RPS6KA5	Unknown
ENSG00000138439	4.49521e-49	0.347477	0.464	0.287	1.64475e-44	0.177	FAM117B	Unknown
ENSG00000145687	3.5717e-132	0.571906	0.773	0.596	1.30685e-127	0.177	SSBP2	Unknown
ENSG00000160584	3.25803e-132	0.54301	0.799	0.622	1.19208e-127	0.177	SIK3	Unknown
ENSG00000183049	3.21622e-112	0.490328	0.675	0.498	1.17678e-107	0.177	CAMK1D	Unknown
ENSG00000185630	1.30091e-65	0.462284	0.603	0.426	4.7599e-61	0.177	PBX1	Unknown
ENSG00000102780	2.68434e-125	0.584806	0.641	0.465	9.82172e-121	0.176	DGKH	Unknown
ENSG00000103319	3.50707e-68	0.364014	0.508	0.332	1.2832e-63	0.176	EEF2K	Unknown
ENSG00000106415	1.13677e-63	0.362544	0.521	0.345	4.15932e-59	0.176	GLCCI1	Unknown
ENSG00000110075	1.50899e-117	0.503529	0.737	0.561	5.52125e-113	0.176	PPP6R3	Unknown
ENSG00000118007	7.36581e-144	0.620643	0.862	0.686	2.69508e-139	0.176	STAG1	Unknown
ENSG00000136813	1.09461e-116	0.526818	0.756	0.58	4.00505e-112	0.176	ECPAS	Unknown
ENSG00000174197	5.34457e-132	0.495662	0.628	0.452	1.95553e-127	0.176	MGA	Unknown
ENSG00000198963	3.85266e-23	0.430309	0.366	0.19	1.40965e-18	0.176	RORB	Unknown
ENSG00000107242	9.68456e-42	0.320293	0.328	0.153	3.54348e-37	0.175	PIP5K1B	Unknown
ENSG00000124177	4.4894e-76	0.360024	0.597	0.422	1.64263e-71	0.175	CHD6	Unknown
ENSG00000163006	6.82814e-92	0.474223	0.717	0.542	2.49835e-87	0.175	CCDC138	Unknown
ENSG00000166377	2.31604e-99	0.400031	0.505	0.33	8.47415e-95	0.175	ATP9B	Unknown
ENSG00000184863	1.68366e-92	0.399638	0.591	0.416	6.16035e-88	0.175	RBM33	Unknown
ENSG00000111783	1.35343e-48	0.528053	0.392	0.218	4.95208e-44	0.174	RFX4	Unknown
ENSG00000138802	1.8598e-84	0.361189	0.477	0.303	6.80481e-80	0.174	SEC24B	Unknown
ENSG00000145349	3.787e-119	0.528853	0.728	0.554	1.38563e-114	0.174	CAMK2D	Unknown
ENSG00000072041	3.16698e-42	0.365522	0.6	0.427	1.15876e-37	0.173	SLC6A15	Unknown
ENSG00000103222	7.17283e-111	0.432374	0.524	0.351	2.62447e-106	0.173	ABCC1	Unknown
ENSG00000139132	7.62859e-100	0.432275	0.608	0.435	2.79123e-95	0.173	FGD4	Unknown
ENSG00000146463	3.50502e-108	0.466644	0.657	0.484	1.28245e-103	0.173	ZMYM4	Unknown
ENSG00000156650	5.14741e-37	0.324552	0.558	0.385	1.88339e-32	0.173	KAT6B	Unknown
ENSG00000165914	6.75609e-82	0.376383	0.464	0.291	2.47199e-77	0.173	TTC7B	Unknown
ENSG00000169604	6.60046e-80	0.422534	0.49	0.317	2.41504e-75	0.173	ANTXR1	Unknown
ENSG00000174501	8.74669e-76	0.331672	0.411	0.238	3.20033e-71	0.173	ANKRD36C	Unknown
ENSG00000186472	2.39917e-66	0.360674	0.425	0.252	8.77832e-62	0.173	PCLO	Unknown
ENSG00000080345	1.3512e-114	0.501266	0.771	0.599	4.94392e-110	0.172	RIF1	Unknown
ENSG00000083642	4.02458e-64	0.407279	0.596	0.424	1.47256e-59	0.172	PDS5B	Unknown
ENSG00000109670	9.10808e-143	0.543597	0.653	0.481	3.33255e-138	0.172	FBXW7	Unknown
ENSG00000112320	8.24693e-78	0.389053	0.478	0.306	3.01747e-73	0.172	SOBP	Unknown
ENSG00000147202	0	1.08063	0.972	0.8	0	0.172	DIAPH2	Unknown
ENSG00000159433	5.60139e-73	0.348552	0.431	0.259	2.04949e-68	0.172	STARD9	Unknown
ENSG00000197969	8.37478e-126	0.51173	0.666	0.494	3.06425e-121	0.172	VPS13A	Unknown
ENSG00000005810	3.04575e-145	0.619094	0.852	0.681	1.11441e-140	0.171	MYCBP2	Unknown
ENSG00000130338	2.08485e-98	0.417058	0.597	0.426	7.62826e-94	0.171	TULP4	Unknown
ENSG00000143207	8.40891e-123	0.458919	0.603	0.432	3.07674e-118	0.171	COP1	Unknown
ENSG00000152601	9.94067e-130	0.528404	0.768	0.597	3.63719e-125	0.171	MBNL1	Unknown
ENSG00000157077	1.64161e-100	0.423498	0.566	0.395	6.00649e-96	0.171	ZFYVE9	Unknown
ENSG00000168502	2.93621e-86	0.378681	0.417	0.246	1.07433e-81	0.171	MTCL1	Unknown
ENSG00000180357	8.68473e-126	0.53241	0.672	0.501	3.17766e-121	0.171	ZNF609	Unknown
ENSG00000181090	2.1652e-124	0.482785	0.721	0.55	7.92227e-120	0.171	EHMT1	Unknown
ENSG00000185238	1.37643e-89	0.411328	0.596	0.425	5.03621e-85	0.171	PRMT3	Unknown
ENSG00000112851	7.06612e-80	0.373351	0.604	0.434	2.58542e-75	0.17	ERBIN	Unknown
ENSG00000131149	3.647e-92	0.436228	0.558	0.388	1.3344e-87	0.17	GSE1	Unknown
ENSG00000138829	4.79561e-69	0.449261	0.454	0.284	1.75467e-64	0.17	FBN2	Unknown
ENSG00000141556	4.45628e-103	0.489913	0.628	0.458	1.63051e-98	0.17	TBCD	Unknown
ENSG00000152061	2.77609e-136	0.509108	0.666	0.496	1.01574e-131	0.17	RABGAP1L	Unknown
ENSG00000188312	8.50348e-98	0.613088	0.691	0.521	3.11134e-93	0.17	CENPP	Unknown
ENSG00000241697	1.23284e-40	0.346869	0.567	0.397	4.51083e-36	0.17	TMEFF1	Unknown
ENSG00000048991	9.03821e-111	0.494351	0.72	0.551	3.30699e-106	0.169	R3HDM1	Unknown
ENSG00000052841	8.78384e-170	0.590602	0.752	0.583	3.21392e-165	0.169	TTC17	Unknown
ENSG00000143190	2.11805e-86	0.471501	0.604	0.435	7.74973e-82	0.169	POU2F1	Unknown
ENSG00000153162	3.86316e-55	0.339985	0.321	0.152	1.41349e-50	0.169	BMP6	Unknown
ENSG00000178105	1.93302e-149	0.563955	0.783	0.614	7.07272e-145	0.169	DDX10	Unknown
ENSG00000178773	1.1534e-38	0.398429	0.657	0.488	4.22017e-34	0.169	CPNE7	Unknown
ENSG00000183579	9.72712e-100	0.551146	0.656	0.487	3.55906e-95	0.169	ZNRF3	Unknown
ENSG00000242808	1.30841e-55	0.896766	0.401	0.232	4.78733e-51	0.169	SOX2-OT	Unknown
ENSG00000066777	5.1857e-88	0.378358	0.569	0.401	1.8974e-83	0.168	ARFGEF1	Unknown
ENSG00000075568	2.46706e-106	0.453161	0.554	0.386	9.02672e-102	0.168	TMEM131	Unknown
ENSG00000091129	2.02678e-58	0.429125	0.436	0.268	7.41578e-54	0.168	NRCAM	Unknown
ENSG00000108021	1.28083e-112	0.544091	0.736	0.568	4.68643e-108	0.168	TASOR2	Unknown
ENSG00000132953	4.12009e-104	0.502723	0.637	0.469	1.5075e-99	0.168	XPO4	Unknown
ENSG00000151779	9.9338e-97	0.444904	0.586	0.418	3.63468e-92	0.168	NBAS	Unknown
ENSG00000185942	3.7374e-22	0.448482	0.447	0.279	1.36748e-17	0.168	NKAIN3	Unknown
ENSG00000008277	2.19954e-49	0.314083	0.38	0.213	8.0479e-45	0.167	ADAM22	Unknown
ENSG00000065526	2.96958e-66	0.379514	0.594	0.427	1.08654e-61	0.167	SPEN	Unknown
ENSG00000066933	6.433e-117	0.436343	0.574	0.407	2.35377e-112	0.167	MYO9A	Unknown
ENSG00000081138	5.43867e-27	0.340393	0.445	0.278	1.98995e-22	0.167	CDH7	Unknown
ENSG00000083544	6.03644e-62	0.350793	0.51	0.343	2.20867e-57	0.167	TDRD3	Unknown
ENSG00000128731	3.26242e-142	0.561808	0.787	0.62	1.19369e-137	0.167	HERC2	Unknown
ENSG00000136237	3.603e-44	0.31419	0.394	0.227	1.3183e-39	0.167	RAPGEF5	Unknown
ENSG00000138336	1.45839e-69	0.444407	0.771	0.604	5.3361e-65	0.167	TET1	Unknown
ENSG00000143324	2.24587e-76	0.333998	0.529	0.362	8.2174e-72	0.167	XPR1	Unknown
ENSG00000145982	1.14524e-96	0.444145	0.631	0.464	4.19031e-92	0.167	FARS2	Unknown
ENSG00000168038	6.16811e-72	0.377665	0.497	0.33	2.25685e-67	0.167	ULK4	Unknown
ENSG00000067715	3.89655e-79	0.467622	0.657	0.491	1.42571e-74	0.166	SYT1	Unknown
ENSG00000075292	3.25239e-188	0.664627	0.871	0.705	1.19002e-183	0.166	ZNF638	Unknown
ENSG00000104375	6.46584e-140	0.521012	0.643	0.477	2.36579e-135	0.166	STK3	Unknown
ENSG00000105926	2.32226e-91	0.47643	0.664	0.498	8.49691e-87	0.166	MPP6	Unknown
ENSG00000106078	6.9099e-33	0.304455	0.373	0.207	2.52827e-28	0.166	COBL	Unknown
ENSG00000134278	2.32662e-90	0.443884	0.625	0.459	8.51286e-86	0.166	SPIRE1	Unknown
ENSG00000140718	2.16938e-137	0.50271	0.632	0.466	7.93754e-133	0.166	FTO	Unknown
ENSG00000185483	7.0404e-96	0.605261	0.495	0.329	2.57601e-91	0.166	ROR1	Unknown
ENSG00000185842	2.79506e-224	0.770982	0.889	0.723	1.02268e-219	0.166	DNAH14	Unknown
ENSG00000196792	1.81038e-109	0.395846	0.552	0.386	6.62402e-105	0.166	STRN3	Unknown
ENSG00000230590	1.54493e-240	0.8076	0.909	0.743	5.65276e-236	0.166	FTX	Unknown
ENSG00000267327	3.51708e-79	0.38739	0.438	0.272	1.28686e-74	0.166	AC009271.1	Unknown
ENSG00000026652	1.3647e-59	0.340377	0.521	0.356	4.99329e-55	0.165	AGPAT4	Unknown
ENSG00000053254	1.01592e-94	0.425446	0.612	0.447	3.71716e-90	0.165	FOXN3	Unknown
ENSG00000086758	4.79581e-112	0.430322	0.715	0.55	1.75474e-107	0.165	HUWE1	Unknown
ENSG00000101333	3.07627e-97	0.728795	0.933	0.768	1.12558e-92	0.165	PLCB4	Unknown
ENSG00000132688	1.01739e-23	0.337049	0.649	0.484	3.72254e-19	0.165	NES	Unknown
ENSG00000157837	1.27443e-85	0.406593	0.647	0.482	4.66301e-81	0.165	SPPL3	Unknown
ENSG00000163872	2.57156e-87	0.402396	0.591	0.426	9.40909e-83	0.165	YEATS2	Unknown
ENSG00000172292	1.7917e-133	0.557656	0.738	0.573	6.55565e-129	0.165	CERS6	Unknown
ENSG00000175048	3.13611e-88	0.405564	0.465	0.3	1.14747e-83	0.165	ZDHHC14	Unknown
ENSG00000187391	1.83913e-114	0.631927	0.58	0.415	6.72921e-110	0.165	MAGI2	Unknown
ENSG00000231527	2.05417e-71	0.342702	0.431	0.266	7.516e-67	0.165	FAM27C	Unknown
ENSG00000259972	5.77756e-77	0.317338	0.388	0.223	2.11395e-72	0.165	AC009120.2	Unknown
ENSG00000011258	1.06603e-78	0.362171	0.524	0.36	3.9005e-74	0.164	MBTD1	Unknown
ENSG00000100354	2.69877e-72	0.373484	0.662	0.498	9.87452e-68	0.164	TNRC6B	Unknown
ENSG00000100433	2.96098e-36	0.267415	0.302	0.138	1.08339e-31	0.164	KCNK10	Unknown
ENSG00000109654	6.16543e-68	0.374521	0.546	0.382	2.25587e-63	0.164	TRIM2	Unknown
ENSG00000145808	1.33332e-95	0.467107	0.481	0.317	4.87847e-91	0.164	ADAMTS19	Unknown
ENSG00000170456	2.34608e-59	0.364629	0.477	0.313	8.58407e-55	0.164	DENND5B	Unknown
ENSG00000251363	2.30791e-124	0.571866	0.774	0.61	8.44442e-120	0.164	LINC02315	Unknown
ENSG00000260528	9.1025e-69	0.418965	0.6	0.436	3.33051e-64	0.164	FAM157C	Unknown
ENSG00000034053	8.72482e-60	0.346373	0.509	0.346	3.19232e-55	0.163	APBA2	Unknown
ENSG00000071205	2.78335e-110	0.473485	0.574	0.411	1.0184e-105	0.163	ARHGAP10	Unknown
ENSG00000139044	4.41873e-99	0.489324	0.523	0.36	1.61677e-94	0.163	B4GALNT3	Unknown
ENSG00000153107	2.30725e-112	0.468314	0.628	0.465	8.44199e-108	0.163	ANAPC1	Unknown
ENSG00000009413	5.91493e-118	0.537537	0.764	0.602	2.16421e-113	0.162	REV3L	Unknown
ENSG00000055609	1.98624e-134	0.500597	0.665	0.503	7.26746e-130	0.162	KMT2C	Unknown
ENSG00000075151	1.60282e-244	0.891905	0.909	0.747	5.86458e-240	0.162	EIF4G3	Unknown
ENSG00000110844	4.24546e-70	0.332189	0.443	0.281	1.55337e-65	0.162	PRPF40B	Unknown
ENSG00000115760	1.23771e-153	0.580714	0.786	0.624	4.52865e-149	0.162	BIRC6	Unknown
ENSG00000148468	6.28154e-65	0.371914	0.587	0.425	2.29835e-60	0.162	FAM171A1	Unknown
ENSG00000148498	1.91415e-264	0.907872	0.936	0.774	7.00368e-260	0.162	PARD3	Unknown
ENSG00000151914	2.17254e-138	0.519522	0.769	0.607	7.9491e-134	0.162	DST	Unknown
ENSG00000163848	2.55632e-91	0.401506	0.629	0.467	9.3533e-87	0.162	ZNF148	Unknown
ENSG00000173120	1.36992e-79	0.34972	0.606	0.444	5.0124e-75	0.162	KDM2A	Unknown
ENSG00000185658	5.26901e-77	0.404979	0.632	0.47	1.92788e-72	0.162	BRWD1	Unknown
ENSG00000198382	9.49841e-146	0.528412	0.717	0.555	3.47537e-141	0.162	UVRAG	Unknown
ENSG00000075391	7.6682e-73	0.378891	0.584	0.423	2.80572e-68	0.161	RASAL2	Unknown
ENSG00000101974	1.01577e-66	0.341263	0.478	0.317	3.71661e-62	0.161	ATP11C	Unknown
ENSG00000111490	1.32574e-45	0.358551	0.507	0.346	4.85074e-41	0.161	TBC1D30	Unknown
ENSG00000112249	1.32316e-121	0.484422	0.698	0.537	4.84129e-117	0.161	ASCC3	Unknown
ENSG00000112941	6.36975e-70	0.355533	0.441	0.28	2.33063e-65	0.161	TENT4A	Unknown
ENSG00000144057	2.26986e-28	0.306894	0.332	0.171	8.3052e-24	0.161	ST6GAL2	Unknown
ENSG00000146555	1.34169e-98	0.351825	0.711	0.55	4.90911e-94	0.161	SDK1	Unknown
ENSG00000156052	8.11282e-143	0.536327	0.723	0.562	2.9684e-138	0.161	GNAQ	Unknown
ENSG00000163694	5.11033e-62	0.465775	0.461	0.3	1.86982e-57	0.161	RBM47	Unknown
ENSG00000182621	4.791e-150	0.625172	0.779	0.618	1.75298e-145	0.161	PLCB1	Unknown
ENSG00000204842	4.94413e-113	0.49589	0.724	0.563	1.80901e-108	0.161	ATXN2	Unknown
ENSG00000111880	9.41587e-103	0.418818	0.538	0.378	3.44517e-98	0.16	RNGTT	Unknown
ENSG00000112701	5.96633e-135	0.51299	0.773	0.613	2.18302e-130	0.16	SENP6	Unknown
ENSG00000117114	6.12004e-76	0.413276	0.471	0.311	2.23926e-71	0.16	ADGRL2	Unknown
ENSG00000135540	6.06437e-81	0.447572	0.531	0.371	2.21889e-76	0.16	NHSL1	Unknown
ENSG00000138031	1.26528e-72	0.371489	0.518	0.358	4.62952e-68	0.16	ADCY3	Unknown
ENSG00000138814	1.17651e-99	0.452019	0.669	0.509	4.30475e-95	0.16	PPP3CA	Unknown
ENSG00000152402	1.85922e-23	0.276639	0.352	0.192	6.80268e-19	0.16	GUCY1A2	Unknown
ENSG00000155966	6.46384e-54	0.308793	0.332	0.172	2.36505e-49	0.16	AFF2	Unknown
ENSG00000038295	6.6311e-44	0.345231	0.357	0.198	2.42625e-39	0.159	TLL1	Unknown
ENSG00000075711	2.03318e-117	0.507571	0.739	0.58	7.43921e-113	0.159	DLG1	Unknown
ENSG00000107518	2.84926e-92	0.47245	0.483	0.324	1.04252e-87	0.159	ATRNL1	Unknown
ENSG00000112242	7.35272e-63	0.391813	0.58	0.421	2.69029e-58	0.159	E2F3	Unknown
ENSG00000144893	1.39117e-93	0.429316	0.429	0.27	5.09017e-89	0.159	MED12L	Unknown
ENSG00000162437	1.79669e-78	0.324717	0.413	0.254	6.57389e-74	0.159	RAVER2	Unknown
ENSG00000203930	2.88199e-76	0.375493	0.565	0.406	1.05449e-71	0.159	LINC00632	Unknown
ENSG00000213079	3.56933e-95	0.37301	0.499	0.34	1.30598e-90	0.159	SCAF8	Unknown
ENSG00000053108	5.04916e-46	0.469464	0.424	0.266	1.84744e-41	0.158	FSTL4	Unknown
ENSG00000091157	1.76149e-75	0.347152	0.374	0.216	6.44512e-71	0.158	WDR7	Unknown
ENSG00000107779	4.08045e-84	0.401717	0.611	0.453	1.49299e-79	0.158	BMPR1A	Unknown
ENSG00000109756	1.12037e-72	0.323982	0.47	0.312	4.09931e-68	0.158	RAPGEF2	Unknown
ENSG00000113391	2.55558e-113	0.511771	0.712	0.554	9.35063e-109	0.158	FAM172A	Unknown
ENSG00000113645	1.88661e-57	0.327782	0.518	0.36	6.90291e-53	0.158	WWC1	Unknown
ENSG00000132466	1.60442e-206	0.688593	0.872	0.714	5.87042e-202	0.158	ANKRD17	Unknown
ENSG00000140386	3.6848e-110	0.429479	0.6	0.442	1.34823e-105	0.158	SCAPER	Unknown
ENSG00000146872	2.22582e-81	0.3539	0.574	0.416	8.14403e-77	0.158	TLK2	Unknown
ENSG00000171843	4.0743e-68	0.390303	0.503	0.345	1.49074e-63	0.158	MLLT3	Unknown
ENSG00000251629	6.27823e-73	0.326028	0.381	0.223	2.29714e-68	0.158	LINC02241	Unknown
ENSG00000263551	1.16465e-46	0.327856	0.403	0.245	4.26135e-42	0.158	AP000829.1	Unknown
ENSG00000112584	5.29878e-85	0.341066	0.448	0.291	1.93877e-80	0.157	FAM120B	Unknown
ENSG00000122870	2.94051e-60	0.339705	0.464	0.307	1.0759e-55	0.157	BICC1	Unknown
ENSG00000134874	3.79011e-91	0.365441	0.523	0.366	1.38676e-86	0.157	DZIP1	Unknown
[truncated: 842 more rows]

## Sheet: Supplementary File 1c
Supplementary File 1c. Differentially expressed transcripts used to compare NE and NE-variant sub-clustering
***relates to Figures 4E-4F
gene	gene_name	p_val	avg_log2FC	p_val_adj	pct.1	pct.2	pct_diff
ENSG00000162992	NEUROD1	6.54769e-136	1.40833	2.39573e-131	0.669	0.044	0.625
ENSG00000107105	ELAVL2	7.8522e-131	1.57336	2.87304e-126	0.764	0.155	0.609
ENSG00000164330	EBF1	1.33914e-122	1.51856	4.89978e-118	0.595	0.029	0.566
ENSG00000176788	BASP1	3.00011e-103	1.43611	1.09771e-98	0.771	0.334	0.437
ENSG00000064655	EYA2	7.01081e-97	1.51476	2.56519e-92	0.762	0.321	0.441
ENSG00000276644	DACH1	5.85751e-95	1.53914	2.1432e-90	0.826	0.437	0.389
ENSG00000205542	TMSB4X	2.01791e-94	1.61254	7.38332e-90	0.979	0.822	0.157
ENSG00000139767	SRRM4	1.52731e-80	0.784019	5.58828e-76	0.481	0.039	0.442
ENSG00000137142	IGFBPL1	4.74032e-79	1.1304	1.73443e-74	0.699	0.246	0.453
ENSG00000131711	MAP1B	1.8449e-71	0.958547	6.7503e-67	0.951	0.863	0.088
ENSG00000106341	PPP1R17	5.9637e-69	0.820471	2.18206e-64	0.349	0.007	0.342
ENSG00000184357	HIST1H1B	1.34561e-68	-1.00372	4.92345e-64	0.336	0.818	-0.482
ENSG00000163584	RPL22L1	1.49215e-68	-0.976692	5.45962e-64	0.824	0.977	-0.153
ENSG00000167641	PPP1R14A	2.31225e-66	1.16694	8.46028e-62	0.629	0.251	0.378
ENSG00000180616	SSTR2	6.10527e-66	0.862832	2.23386e-61	0.489	0.082	0.407
ENSG00000104435	STMN2	1.13318e-65	1.33141	4.14619e-61	0.38	0.041	0.339
ENSG00000124575	HIST1H1D	6.85379e-65	-0.971337	2.50773e-60	0.338	0.805	-0.467
ENSG00000153956	CACNA2D1	1.1848e-63	1.35551	4.33506e-59	0.813	0.631	0.182
ENSG00000197061	HIST1H4C	2.05947e-59	-0.967623	7.53541e-55	0.815	0.968	-0.153
ENSG00000099624	ATP5F1D	5.16533e-58	-0.574134	1.88994e-53	0.94	0.996	-0.056
ENSG00000187837	HIST1H1C	6.25757e-58	-0.769388	2.28958e-53	0.38	0.819	-0.439
ENSG00000108001	EBF3	1.36408e-56	0.892352	4.99102e-52	0.567	0.168	0.399
ENSG00000286522	HIST1H3B	1.47672e-55	-0.736756	5.40319e-51	0.282	0.726	-0.444
ENSG00000168298	HIST1H1E	1.63542e-55	-0.736687	5.98384e-51	0.34	0.777	-0.437
ENSG00000007264	MATK	2.1833e-55	-0.557914	7.98848e-51	0.41	0.808	-0.398
ENSG00000121905	HPCA	3.55629e-54	0.433061	1.30121e-49	0.238	0	0.238
ENSG00000144229	THSD7B	4.919e-53	1.0977	1.79981e-48	0.356	0.054	0.302
ENSG00000196361	ELAVL3	6.21033e-53	0.80411	2.2723e-48	0.479	0.121	0.358
ENSG00000160145	KALRN	1.34257e-52	0.966072	4.91234e-48	0.592	0.254	0.338
ENSG00000197409	HIST1H3D	2.96407e-52	-0.589267	1.08452e-47	0.257	0.676	-0.419
ENSG00000100300	TSPO	4.23325e-52	-0.624877	1.5489e-47	0.794	0.961	-0.167
ENSG00000250305	TRMT9B	2.36234e-51	0.685191	8.64358e-47	0.431	0.079	0.352
ENSG00000143355	LHX9	4.59024e-51	0.664816	1.67952e-46	0.313	0.02	0.293
ENSG00000116717	GADD45A	1.33033e-50	0.991543	4.86755e-46	0.699	0.481	0.218
ENSG00000078018	MAP2	1.51855e-50	0.92302	5.55624e-46	0.481	0.138	0.343
ENSG00000272398	CD24	5.71496e-50	0.781431	2.09105e-45	0.792	0.437	0.355
ENSG00000104529	EEF1D	7.76882e-50	-0.55197	2.84254e-45	0.956	0.996	-0.04
ENSG00000196526	AFAP1	1.92103e-49	0.662017	7.02887e-45	0.491	0.184	0.307
ENSG00000169715	MT1E	2.8183e-49	-1.53581	1.03119e-44	0.074	0.392	-0.318
ENSG00000124766	SOX4	7.59324e-49	0.929479	2.77829e-44	0.893	0.831	0.062
ENSG00000125148	MT2A	3.17226e-48	-1.50319	1.1607e-43	0.171	0.528	-0.357
ENSG00000185942	NKAIN3	4.64969e-48	1.08706	1.70127e-43	0.643	0.351	0.292
ENSG00000090097	PCBP4	1.19282e-46	0.64818	4.36442e-42	0.496	0.245	0.251
ENSG00000283982	AL445623.2	2.12644e-46	0.649886	7.78044e-42	0.35	0.05	0.3
ENSG00000213578	CPLX3	2.93408e-46	0.864363	1.07355e-41	0.349	0.057	0.292
ENSG00000151746	BICD1	3.56981e-46	0.821802	1.30616e-41	0.694	0.472	0.222
ENSG00000221818	EBF2	4.46058e-46	0.833935	1.63208e-41	0.336	0.035	0.301
ENSG00000198732	SMOC1	5.58983e-46	-0.488631	2.04526e-41	0.09	0.437	-0.347
ENSG00000183971	NPW	2.37608e-45	-0.67281	8.69384e-41	0.931	0.98	-0.049
ENSG00000182985	CADM1	2.77195e-45	0.790542	1.01423e-40	0.66	0.485	0.175
ENSG00000100095	SEZ6L	6.02168e-45	0.829449	2.20327e-40	0.259	0.012	0.247
ENSG00000168280	KIF5C	7.79084e-45	0.780159	2.85059e-40	0.66	0.405	0.255
ENSG00000106538	RARRES2	1.25007e-44	-0.72141	4.57388e-40	0.313	0.679	-0.366
ENSG00000140905	GCSH	1.25278e-44	-0.560707	4.5838e-40	0.632	0.913	-0.281
ENSG00000034510	TMSB10	3.27594e-44	0.916403	1.19863e-39	0.975	0.984	-0.009
ENSG00000182240	BACE2	3.3473e-44	-0.40315	1.22474e-39	0.15	0.523	-0.373
ENSG00000010810	FYN	6.43208e-44	0.755674	2.35343e-39	0.665	0.434	0.231
ENSG00000203852	HIST2H3A	1.74508e-43	-0.716565	6.38506e-39	0.187	0.566	-0.379
ENSG00000163694	RBM47	2.24145e-43	-0.442108	8.20123e-39	0.053	0.367	-0.314
ENSG00000086506	HBQ1	2.35525e-43	-0.532805	8.61764e-39	0.371	0.757	-0.386
ENSG00000149926	TLCD3B	3.87144e-43	0.548379	1.41652e-38	0.361	0.074	0.287
ENSG00000144834	TAGLN3	4.40386e-43	0.69073	1.61133e-38	0.465	0.195	0.27
ENSG00000184260	HIST2H2AC	5.5737e-43	-0.467962	2.03936e-38	0.246	0.625	-0.379
ENSG00000277443	MARCKS	1.26676e-42	0.775653	4.63494e-38	0.931	0.827	0.104
ENSG00000166165	CKB	1.78109e-42	-0.738954	6.51684e-38	0.979	0.996	-0.017
ENSG00000151892	GFRA1	6.65901e-42	0.434128	2.43647e-37	0.276	0.02	0.256
ENSG00000173404	INSM1	1.06851e-41	0.572541	3.90959e-37	0.305	0.036	0.269
ENSG00000184305	CCSER1	2.72932e-41	0.911024	9.98631e-37	0.676	0.615	0.061
ENSG00000124785	NRN1	2.74066e-41	0.800307	1.00278e-36	0.783	0.516	0.267
ENSG00000132475	H3F3B	3.06866e-41	0.551731	1.12279e-36	0.988	0.972	0.016
ENSG00000243678	NME2	3.95519e-41	-0.353417	1.44716e-36	0.998	1	-0.002
ENSG00000273983	HIST1H3G	6.55163e-41	-0.483954	2.39718e-36	0.15	0.507	-0.357
ENSG00000198931	APRT	6.891e-41	-0.547311	2.52135e-36	0.82	0.972	-0.152
ENSG00000188452	CERKL	7.79341e-41	0.461261	2.85153e-36	0.255	0.015	0.24
ENSG00000104112	SCG3	8.58745e-41	0.48589	3.14206e-36	0.345	0.074	0.271
ENSG00000172020	GAP43	9.34856e-41	0.725961	3.42054e-36	0.474	0.229	0.245
ENSG00000148908	RGS10	1.14719e-40	0.606264	4.19746e-36	0.755	0.638	0.117
ENSG00000168785	TSPAN5	1.43185e-40	0.646512	5.23899e-36	0.632	0.383	0.249
ENSG00000008394	MGST1	6.01894e-40	-0.342151	2.20227e-35	0.505	0.854	-0.349
ENSG00000135940	COX5B	1.03643e-39	-0.509469	3.7922e-35	0.928	0.993	-0.065
ENSG00000121211	MND1	2.49185e-39	-0.438969	9.11742e-35	0.361	0.738	-0.377
ENSG00000075624	ACTB	2.75471e-39	0.558204	1.00792e-34	0.993	0.994	-0.001
ENSG00000153707	PTPRD	3.69406e-39	0.93547	1.35162e-34	0.579	0.364	0.215
ENSG00000196787	HIST1H2AG	9.07506e-39	-0.413356	3.32047e-34	0.19	0.541	-0.351
ENSG00000272168	CASC15	4.52368e-38	1.02241	1.65517e-33	0.484	0.171	0.313
ENSG00000168779	SHOX2	6.39982e-38	0.434733	2.34163e-33	0.254	0.025	0.229
ENSG00000165113	GKAP1	1.25739e-37	0.905316	4.60065e-33	0.528	0.308	0.22
ENSG00000154310	TNIK	2.1238e-37	0.61534	7.77079e-33	0.322	0.055	0.267
ENSG00000231500	RPS18	2.23614e-37	-0.288328	8.18182e-33	1	1	0
ENSG00000125144	MT1G	3.19827e-37	-1.30913	1.17022e-32	0.021	0.246	-0.225
ENSG00000130829	DUSP9	4.48443e-37	-0.347403	1.64081e-32	0.164	0.49	-0.326
ENSG00000170396	ZNF804A	8.07545e-37	0.865699	2.95472e-32	0.53	0.335	0.195
ENSG00000196220	SRGAP3	9.37077e-37	0.709836	3.42867e-32	0.66	0.56	0.1
ENSG00000173207	CKS1B	1.29728e-36	-0.327196	4.74661e-32	0.588	0.901	-0.313
ENSG00000141433	ADCYAP1	2.56385e-36	0.349079	9.38087e-32	0.195	0.004	0.191
ENSG00000171786	NHLH1	3.12572e-36	0.452965	1.14367e-31	0.225	0.012	0.213
ENSG00000112319	EYA4	5.23832e-36	-0.661266	1.91665e-31	0.165	0.478	-0.313
ENSG00000185477	GPRIN3	1.15829e-35	0.388445	4.23807e-31	0.248	0.023	0.225
ENSG00000187193	MT1X	1.24203e-35	-1.29138	4.54445e-31	0.195	0.497	-0.302
ENSG00000163618	CADPS	1.27859e-35	0.716118	4.67824e-31	0.238	0.026	0.212
ENSG00000162545	CAMK2N1	1.67355e-35	0.451278	6.12333e-31	0.262	0.029	0.233
ENSG00000067715	SYT1	4.29612e-35	0.740783	1.57191e-30	0.715	0.552	0.163
ENSG00000159199	ATP5MC1	5.19767e-35	-0.455801	1.90178e-30	0.87	0.985	-0.115
ENSG00000137285	TUBB2B	1.25816e-34	0.699515	4.60348e-30	0.933	0.904	0.029
ENSG00000105202	FBL	1.97731e-34	-0.383289	7.23478e-30	0.952	0.991	-0.039
ENSG00000198417	MT1F	2.52933e-34	-0.391229	9.25456e-30	0.033	0.255	-0.222
ENSG00000083807	SLC27A5	3.14603e-34	-0.419871	1.1511e-29	0.528	0.847	-0.319
ENSG00000112667	DNPH1	3.62136e-34	-0.49904	1.32502e-29	0.68	0.917	-0.237
ENSG00000106278	PTPRZ1	3.98578e-34	-0.356767	1.45836e-29	0.15	0.431	-0.281
ENSG00000130255	RPL36	2.27019e-33	-0.261618	8.3064e-29	1	1	0
ENSG00000176887	SOX11	2.29354e-33	0.637707	8.39184e-29	0.731	0.618	0.113
ENSG00000105185	PDCD5	3.09069e-33	-0.472499	1.13085e-28	0.653	0.913	-0.26
ENSG00000177700	POLR2L	3.14945e-33	-0.477208	1.15235e-28	0.764	0.953	-0.189
ENSG00000175745	NR2F1	4.59765e-33	-0.61804	1.68223e-28	0.576	0.808	-0.232
ENSG00000151150	ANK3	5.78222e-33	0.747126	2.11566e-28	0.421	0.242	0.179
ENSG00000112137	PHACTR1	6.29774e-33	0.663827	2.30428e-28	0.438	0.198	0.24
ENSG00000152208	GRID2	1.12295e-32	1.00872	4.10877e-28	0.386	0.152	0.234
ENSG00000105438	KDELR1	3.25575e-32	0.407884	1.19125e-27	0.917	0.92	-0.003
ENSG00000089685	BIRC5	3.35895e-32	-0.142455	1.22901e-27	0.493	0.789	-0.296
ENSG00000159251	ACTC1	3.64115e-32	0.354097	1.33226e-27	0.176	0.006	0.17
ENSG00000166206	GABRB3	3.71036e-32	0.530052	1.35758e-27	0.486	0.29	0.196
ENSG00000138801	PAPSS1	4.47334e-32	0.48064	1.63675e-27	0.581	0.453	0.128
ENSG00000110092	CCND1	6.91961e-32	-0.390778	2.53182e-27	0.215	0.545	-0.33
ENSG00000124194	GDAP1L1	1.00132e-31	0.419296	3.66375e-27	0.298	0.07	0.228
ENSG00000065320	NTN1	1.47355e-31	-0.436549	5.39159e-27	0.026	0.226	-0.2
ENSG00000156976	EIF4A2	2.99068e-31	0.503557	1.09426e-26	0.813	0.797	0.016
ENSG00000070961	ATP2B1	5.15823e-31	0.438721	1.88735e-26	0.702	0.656	0.046
ENSG00000196683	TOMM7	5.34951e-31	-0.383008	1.95733e-26	0.961	0.997	-0.036
ENSG00000134871	COL4A2	5.53972e-31	-0.216003	2.02693e-26	0.361	0.675	-0.314
ENSG00000189056	RELN	5.69998e-31	0.619795	2.08557e-26	0.308	0.063	0.245
ENSG00000127824	TUBA4A	5.81661e-31	0.407501	2.12824e-26	0.331	0.137	0.194
ENSG00000159023	EPB41	6.84022e-31	0.500689	2.50277e-26	0.65	0.634	0.016
ENSG00000131747	TOP2A	1.30315e-30	-0.252695	4.76811e-26	0.458	0.77	-0.312
ENSG00000168036	CTNNB1	1.51334e-30	0.416371	5.53715e-26	0.563	0.501	0.062
ENSG00000138606	SHF	1.70567e-30	0.43378	6.24087e-26	0.349	0.115	0.234
ENSG00000205220	PSMB10	2.40073e-30	-0.420935	8.78405e-26	0.481	0.793	-0.312
ENSG00000152784	PRDM8	3.62497e-30	0.251862	1.32634e-25	0.157	0.003	0.154
ENSG00000262484	CCER2	4.99368e-30	0.40544	1.82714e-25	0.243	0.042	0.201
ENSG00000137818	RPLP1	5.63535e-30	-0.209285	2.06192e-25	1	1	0
ENSG00000137941	TTLL7	7.53894e-30	0.454994	2.75842e-25	0.433	0.203	0.23
ENSG00000164853	UNCX	1.09065e-29	0.44436	3.99058e-25	0.155	0.001	0.154
ENSG00000213190	MLLT11	1.41985e-29	0.545831	5.19511e-25	0.518	0.331	0.187
ENSG00000145087	STXBP5L	1.5331e-29	0.409608	5.60945e-25	0.232	0.034	0.198
ENSG00000091010	POU4F3	1.71787e-29	0.249161	6.28551e-25	0.129	0.003	0.126
ENSG00000141401	IMPA2	2.04592e-29	-0.274646	7.48582e-25	0.349	0.671	-0.322
ENSG00000170035	UBE2E3	2.0611e-29	0.467535	7.54134e-25	0.745	0.637	0.108
ENSG00000163170	BOLA3	2.14129e-29	-0.408198	7.83477e-25	0.407	0.727	-0.32
ENSG00000163590	PPM1L	2.94043e-29	0.615707	1.07587e-24	0.732	0.701	0.031
ENSG00000185008	ROBO2	4.48858e-29	0.77045	1.64233e-24	0.583	0.302	0.281
ENSG00000070831	CDC42	6.50199e-29	0.322684	2.37901e-24	0.734	0.738	-0.004
ENSG00000175274	TP53I11	8.08428e-29	0.362471	2.95796e-24	0.252	0.038	0.214
ENSG00000106689	LHX2	9.81436e-29	0.42612	3.59097e-24	0.211	0.02	0.191
ENSG00000134986	NREP	1.07006e-28	0.441119	3.91524e-24	0.59	0.504	0.086
ENSG00000141837	CACNA1A	1.13669e-28	0.586879	4.15903e-24	0.329	0.15	0.179
ENSG00000109472	CPE	1.25883e-28	0.514088	4.60592e-24	0.611	0.436	0.175
ENSG00000104722	NEFM	1.36453e-28	0.520108	4.99269e-24	0.461	0.499	-0.038
ENSG00000136810	TXN	1.93344e-28	-0.456794	7.07425e-24	0.937	0.985	-0.048
ENSG00000142669	SH3BGRL3	2.23708e-28	0.573347	8.18524e-24	0.526	0.36	0.166
ENSG00000103266	STUB1	2.86499e-28	-0.507726	1.04827e-23	0.717	0.904	-0.187
ENSG00000080200	CRYBG3	2.92946e-28	0.452355	1.07186e-23	0.345	0.105	0.24
ENSG00000101680	LAMA1	3.64801e-28	-0.29539	1.33477e-23	0.28	0.589	-0.309
ENSG00000175175	PPM1E	7.19614e-28	0.487373	2.63299e-23	0.694	0.652	0.042
ENSG00000100503	NIN	8.15294e-28	0.453793	2.98308e-23	0.488	0.345	0.143
ENSG00000162704	ARPC5	9.24991e-28	0.341461	3.38445e-23	0.681	0.679	0.002
ENSG00000263551	AP000829.1	1.41374e-27	0.627723	5.17275e-23	0.454	0.286	0.168
ENSG00000175183	CSRP2	1.44594e-27	0.499458	5.29054e-23	0.607	0.399	0.208
ENSG00000277775	HIST1H3F	1.53132e-27	-0.381432	5.60296e-23	0.095	0.351	-0.256
ENSG00000066279	ASPM	1.80208e-27	-0.171283	6.59362e-23	0.315	0.589	-0.274
ENSG00000075618	FSCN1	2.04143e-27	0.405614	7.4694e-23	0.46	0.245	0.215
ENSG00000165194	PCDH19	2.65672e-27	-0.187921	9.72067e-23	0.025	0.203	-0.178
ENSG00000101412	E2F1	3.31288e-27	0.464334	1.21215e-22	0.463	0.321	0.142
ENSG00000183580	FBXL7	4.23427e-27	0.744127	1.54928e-22	0.546	0.319	0.227
ENSG00000026025	VIM	4.62084e-27	-0.342112	1.69072e-22	0.896	0.991	-0.095
ENSG00000167863	ATP5PD	6.21349e-27	-0.335974	2.27345e-22	0.618	0.885	-0.267
ENSG00000167552	TUBA1A	7.352e-27	0.803822	2.69002e-22	0.945	0.927	0.018
ENSG00000157216	SSBP3	7.98058e-27	0.526877	2.92001e-22	0.639	0.481	0.158
ENSG00000183098	GPC6	9.56816e-27	0.668275	3.50089e-22	0.845	0.831	0.014
ENSG00000161016	RPL8	1.00497e-26	-0.244234	3.67708e-22	1	1	0
ENSG00000137872	SEMA6D	1.07498e-26	0.719056	3.93326e-22	0.826	0.698	0.128
ENSG00000154640	BTG3	1.9047e-26	0.393685	6.96911e-22	0.63	0.615	0.015
ENSG00000071054	MAP4K4	1.96445e-26	0.608825	7.18771e-22	0.706	0.587	0.119
ENSG00000058091	CDK14	2.05134e-26	0.555976	7.50565e-22	0.62	0.523	0.097
ENSG00000170624	SGCD	2.19736e-26	0.686741	8.03991e-22	0.335	0.152	0.183
ENSG00000159714	ZDHHC1	2.30294e-26	-0.312457	8.42623e-22	0.158	0.401	-0.243
ENSG00000184144	CNTN2	3.46352e-26	0.388505	1.26727e-21	0.165	0.009	0.156
ENSG00000171533	MAP6	5.00762e-26	0.497972	1.83224e-21	0.382	0.162	0.22
ENSG00000034713	GABARAPL2	5.21441e-26	0.359407	1.9079e-21	0.706	0.631	0.075
ENSG00000152495	CAMK4	5.40201e-26	0.583039	1.97654e-21	0.428	0.224	0.204
ENSG00000117632	STMN1	5.42378e-26	0.56058	1.98451e-21	0.977	0.972	0.005
ENSG00000185532	PRKG1	6.20125e-26	0.547896	2.26897e-21	0.567	0.545	0.022
ENSG00000156650	KAT6B	6.78803e-26	0.463141	2.48367e-21	0.572	0.517	0.055
ENSG00000185630	PBX1	7.60632e-26	0.546606	2.78308e-21	0.641	0.532	0.109
ENSG00000134057	CCNB1	8.2244e-26	-0.122321	3.00923e-21	0.408	0.69	-0.282
EGFP		8.8343e-26	0.668063	3.23238e-21	1	1	0
ENSG00000165959	CLMN	9.36016e-26	-0.231707	3.42479e-21	0.102	0.331	-0.229
ENSG00000197958	RPL12	1.4426e-25	-0.238472	5.27834e-21	0.998	1	-0.002
ENSG00000091409	ITGA6	1.6928e-25	-0.137231	6.19379e-21	0.088	0.293	-0.205
ENSG00000145920	CPLX2	2.05932e-25	0.337154	7.53483e-21	0.236	0.054	0.182
ENSG00000114784	EIF1B	2.30345e-25	0.356989	8.4281e-21	0.732	0.713	0.019
ENSG00000109265	KIAA1211	2.37803e-25	0.523719	8.70097e-21	0.676	0.573	0.103
ENSG00000132688	NES	2.43691e-25	-0.384752	8.91643e-21	0.336	0.636	-0.3
ENSG00000107833	NPM3	2.62014e-25	-0.328702	9.58685e-21	0.496	0.79	-0.294
ENSG00000013306	SLC25A39	3.13927e-25	-0.353455	1.14863e-20	0.625	0.879	-0.254
ENSG00000125968	ID1	3.43248e-25	-0.458712	1.25591e-20	0.32	0.617	-0.297
ENSG00000155816	FMN2	3.54732e-25	0.351519	1.29793e-20	0.287	0.176	0.111
ENSG00000181449	SOX2	3.65206e-25	-0.287977	1.33625e-20	0.37	0.63	-0.26
ENSG00000145423	SFRP2	3.68472e-25	-0.278434	1.3482e-20	0.289	0.536	-0.247
ENSG00000156970	BUB1B	4.08945e-25	-0.172408	1.49629e-20	0.268	0.536	-0.268
ENSG00000105426	PTPRS	4.24871e-25	0.407309	1.55456e-20	0.576	0.532	0.044
ENSG00000258947	TUBB3	4.86586e-25	0.550056	1.78037e-20	0.914	0.816	0.098
ENSG00000174145	NWD2	5.44123e-25	0.328127	1.99089e-20	0.215	0.045	0.17
ENSG00000179104	TMTC2	5.8026e-25	0.612503	2.12311e-20	0.516	0.464	0.052
ENSG00000157570	TSPAN18	6.39606e-25	0.422671	2.34026e-20	0.243	0.057	0.186
ENSG00000188107	EYS	6.47343e-25	0.538273	2.36856e-20	0.238	0.063	0.175
ENSG00000231607	DLEU2	7.35261e-25	0.508293	2.69025e-20	0.59	0.573	0.017
ENSG00000145247	OCIAD2	7.47807e-25	0.4708	2.73615e-20	0.537	0.395	0.142
ENSG00000125354	SEPTIN6	7.8174e-25	0.370979	2.86031e-20	0.486	0.437	0.049
ENSG00000243449	C4orf48	8.19888e-25	0.429717	2.99989e-20	0.65	0.618	0.032
ENSG00000166233	ARIH1	8.21501e-25	0.411914	3.00579e-20	0.657	0.634	0.023
ENSG00000110987	BCL7A	1.06796e-24	0.396404	3.90754e-20	0.657	0.596	0.061
ENSG00000171604	CXXC5	1.12472e-24	0.426592	4.11525e-20	0.398	0.22	0.178
ENSG00000243927	MRPS6	1.20626e-24	0.283248	4.41357e-20	0.748	0.851	-0.103
ENSG00000241697	TMEFF1	1.33652e-24	0.490156	4.89019e-20	0.609	0.513	0.096
ENSG00000274997	HIST1H2AH	1.36388e-24	-0.313994	4.99029e-20	0.146	0.407	-0.261
ENSG00000182552	RWDD4	1.82088e-24	0.291394	6.66242e-20	0.597	0.571	0.026
ENSG00000026297	RNASET2	1.85397e-24	-0.326314	6.7835e-20	0.393	0.691	-0.298
ENSG00000136521	NDUFB5	1.87297e-24	-0.244522	6.85303e-20	0.373	0.666	-0.293
ENSG00000177600	RPLP2	2.42527e-24	-0.187348	8.87383e-20	1	1	0
ENSG00000155959	VBP1	2.90876e-24	0.276752	1.06429e-19	0.592	0.58	0.012
ENSG00000100320	RBFOX2	2.96958e-24	0.373267	1.08654e-19	0.743	0.745	-0.002
ENSG00000126453	BCL2L12	3.14203e-24	-0.171237	1.14964e-19	0.217	0.477	-0.26
ENSG00000104177	MYEF2	3.20723e-24	0.343455	1.17349e-19	0.518	0.468	0.05
ENSG00000187323	DCC	3.22566e-24	1.14923	1.18024e-19	0.586	0.366	0.22
ENSG00000158406	HIST1H4H	3.92079e-24	-0.306202	1.43458e-19	0.114	0.366	-0.252
ENSG00000103485	QPRT	4.2103e-24	-0.360237	1.54051e-19	0.401	0.695	-0.294
ENSG00000177576	C18orf32	4.2295e-24	0.348536	1.54753e-19	0.532	0.456	0.076
ENSG00000143344	RGL1	4.55732e-24	0.564723	1.66748e-19	0.519	0.258	0.261
ENSG00000249413	AC116049.2	4.66061e-24	0.589386	1.70527e-19	0.6	0.48	0.12
ENSG00000135333	EPHA7	4.72772e-24	0.505102	1.72983e-19	0.312	0.115	0.197
ENSG00000164167	LSM6	5.19325e-24	0.18135	1.90016e-19	0.625	0.716	-0.091
ENSG00000164611	PTTG1	8.65711e-24	-0.023748	3.16755e-19	0.539	0.778	-0.239
ENSG00000204922	UQCC3	9.08387e-24	-0.385839	3.3237e-19	0.685	0.901	-0.216
ENSG00000163625	WDFY3	9.39005e-24	0.387709	3.43573e-19	0.486	0.439	0.047
ENSG00000164237	CMBL	9.53712e-24	-0.339087	3.48954e-19	0.447	0.736	-0.289
ENSG00000167614	TTYH1	9.53977e-24	-0.366188	3.49051e-19	0.056	0.239	-0.183
ENSG00000148737	TCF7L2	1.18716e-23	0.523585	4.34368e-19	0.57	0.638	-0.068
ENSG00000205213	LGR4	1.2999e-23	-0.336422	4.7562e-19	0.266	0.528	-0.262
ENSG00000102226	USP11	1.34388e-23	0.17971	4.91711e-19	0.528	0.598	-0.07
ENSG00000158816	VWA5B1	1.85593e-23	-0.193956	6.79066e-19	0.07	0.265	-0.195
ENSG00000135404	CD63	2.13534e-23	0.392278	7.81301e-19	0.863	0.905	-0.042
ENSG00000182674	KCNB2	2.23134e-23	0.590963	8.16424e-19	0.375	0.141	0.234
ENSG00000196976	LAGE3	2.23914e-23	-0.302141	8.19279e-19	0.467	0.755	-0.288
ENSG00000145730	PAM	2.66609e-23	0.489328	9.75496e-19	0.6	0.577	0.023
ENSG00000075043	KCNQ2	2.82247e-23	0.304853	1.03271e-18	0.551	0.5	0.051
ENSG00000140988	RPS2	2.97379e-23	-0.214906	1.08808e-18	1	1	0
ENSG00000187231	SESTD1	3.17255e-23	0.352906	1.1608e-18	0.35	0.185	0.165
ENSG00000174917	MICOS13	3.20679e-23	-0.35425	1.17333e-18	0.688	0.905	-0.217
ENSG00000114405	C3orf14	3.9775e-23	0.292345	1.45533e-18	0.458	0.391	0.067
ENSG00000004487	KDM1A	4.39613e-23	0.388651	1.6085e-18	0.829	0.824	0.005
ENSG00000267313	AC021504.1	4.54036e-23	0.344524	1.66127e-18	0.63	0.672	-0.042
ENSG00000167468	GPX4	5.43904e-23	-0.360713	1.99009e-18	0.889	0.98	-0.091
ENSG00000198498	TMA16	5.48333e-23	0.24216	2.0063e-18	0.665	0.722	-0.057
ENSG00000177685	CRACR2B	5.88439e-23	-0.424669	2.15304e-18	0.204	0.475	-0.271
ENSG00000132437	DDC	6.10731e-23	-0.177134	2.2346e-18	0.113	0.305	-0.192
ENSG00000184428	TOP1MT	7.01175e-23	-0.282525	2.56553e-18	0.357	0.649	-0.292
ENSG00000083067	TRPM3	7.07519e-23	-0.860538	2.58874e-18	0.254	0.504	-0.25
ENSG00000117724	CENPF	7.18668e-23	-0.0549561	2.62954e-18	0.59	0.835	-0.245
ENSG00000130584	ZBTB46	7.4764e-23	0.217295	2.73554e-18	0.165	0.017	0.148
ENSG00000175550	DRAP1	8.02383e-23	-0.200472	2.93584e-18	0.433	0.706	-0.273
ENSG00000178035	IMPDH2	8.21007e-23	-0.360497	3.00398e-18	0.856	0.961	-0.105
ENSG00000137288	UQCC2	8.93263e-23	-0.23369	3.26836e-18	0.565	0.825	-0.26
ENSG00000151789	ZNF385D	1.16588e-22	0.331248	4.26585e-18	0.408	0.541	-0.133
ENSG00000054523	KIF1B	1.18306e-22	0.415278	4.32868e-18	0.69	0.65	0.04
ENSG00000145495	MARCH6	1.18761e-22	0.388468	4.34535e-18	0.657	0.646	0.011
ENSG00000077279	DCX	1.25767e-22	0.372024	4.6017e-18	0.151	0.009	0.142
ENSG00000179091	CYC1	1.29765e-22	-0.386489	4.74798e-18	0.773	0.937	-0.164
ENSG00000182667	NTM	1.44092e-22	-0.306297	5.27218e-18	0.246	0.477	-0.231
ENSG00000123307	NEUROD4	1.46644e-22	0.256151	5.36557e-18	0.129	0.004	0.125
ENSG00000137942	FNBP1L	1.61127e-22	0.381391	5.89547e-18	0.511	0.477	0.034
ENSG00000164109	MAD2L1	1.81515e-22	-0.0892773	6.64145e-18	0.609	0.835	-0.226
ENSG00000139734	DIAPH3	2.2115e-22	-0.185398	8.09166e-18	0.396	0.659	-0.263
ENSG00000054654	SYNE2	2.7185e-22	0.44497	9.94672e-18	0.528	0.487	0.041
ENSG00000175063	UBE2C	3.04135e-22	-0.0678376	1.1128e-17	0.504	0.751	-0.247
ENSG00000015592	STMN4	3.05566e-22	0.458915	1.11803e-17	0.12	0.001	0.119
ENSG00000204316	MRPL38	3.13692e-22	-0.213236	1.14777e-17	0.502	0.77	-0.268
ENSG00000152192	POU4F1	3.43723e-22	0.32446	1.25765e-17	0.306	0.093	0.213
ENSG00000152217	SETBP1	3.50984e-22	0.589841	1.28421e-17	0.586	0.379	0.207
ENSG00000145703	IQGAP2	3.52909e-22	-0.231696	1.29126e-17	0.164	0.404	-0.24
ENSG00000143702	CEP170	3.57757e-22	0.355767	1.309e-17	0.611	0.576	0.035
ENSG00000103253	HAGHL	3.67323e-22	-0.363915	1.344e-17	0.405	0.691	-0.286
ENSG00000114126	TFDP2	3.8532e-22	0.52626	1.40985e-17	0.827	0.7	0.127
ENSG00000178773	CPNE7	4.38359e-22	-0.227929	1.60391e-17	0.461	0.719	-0.258
ENSG00000176974	SHMT1	4.44927e-22	-0.166187	1.62794e-17	0.197	0.436	-0.239
ENSG00000169851	PCDH7	4.53527e-22	-0.457396	1.65941e-17	0.065	0.276	-0.211
ENSG00000120549	KIAA1217	4.69231e-22	-0.177655	1.71687e-17	0.164	0.399	-0.235
ENSG00000108830	RND2	5.42042e-22	0.360567	1.98328e-17	0.349	0.2	0.149
ENSG00000168061	SAC3D1	5.43476e-22	-0.201614	1.98852e-17	0.519	0.781	-0.262
ENSG00000114656	KIAA1257	5.48952e-22	-0.253944	2.00856e-17	0.099	0.321	-0.222
ENSG00000188641	DPYD	5.78964e-22	0.47111	2.11837e-17	0.229	0.069	0.16
ENSG00000108528	SLC25A11	6.12387e-22	-0.114137	2.24066e-17	0.408	0.647	-0.239
ENSG00000196312	MFSD14C	6.43165e-22	0.0687029	2.35328e-17	0.44	0.57	-0.13
ENSG00000148143	ZNF462	6.80891e-22	0.339763	2.49131e-17	0.486	0.483	0.003
ENSG00000060709	RIMBP2	6.90791e-22	-0.178408	2.52754e-17	0.09	0.297	-0.207
ENSG00000138411	HECW2	7.1459e-22	0.415338	2.61461e-17	0.289	0.106	0.183
ENSG00000151474	FRMD4A	7.54551e-22	0.347549	2.76083e-17	0.484	0.506	-0.022
ENSG00000178568	ERBB4	8.35304e-22	0.887044	3.05629e-17	0.651	0.679	-0.028
ENSG00000170296	GABARAP	9.13138e-22	0.470979	3.34108e-17	0.891	0.863	0.028
ENSG00000100505	TRIM9	9.41025e-22	0.288478	3.44312e-17	0.572	0.579	-0.007
ENSG00000104964	TLE5	9.61449e-22	0.308625	3.51785e-17	0.467	0.429	0.038
ENSG00000229117	RPL41	9.70031e-22	-0.181873	3.54925e-17	0.998	1	-0.002
ENSG00000101871	MID1	1.04271e-21	0.40731	3.81518e-17	0.38	0.344	0.036
ENSG00000117906	RCN2	1.06293e-21	0.309394	3.88916e-17	0.815	0.819	-0.004
ENSG00000100604	CHGA	1.1007e-21	0.223109	4.02733e-17	0.183	0.031	0.152
ENSG00000158457	TSPAN33	1.20384e-21	-0.187813	4.40474e-17	0.134	0.359	-0.225
ENSG00000182774	RPS17	1.23593e-21	-0.276981	4.52213e-17	1	1	0
ENSG00000139970	RTN1	1.2898e-21	0.319866	4.71924e-17	0.181	0.034	0.147
ENSG00000117569	PTBP2	1.42579e-21	0.340677	5.21683e-17	0.681	0.714	-0.033
ENSG00000164032	H2AFZ	1.42793e-21	-0.313722	5.22464e-17	0.968	0.996	-0.028
ENSG00000101052	IFT52	1.6594e-21	0.116726	6.07157e-17	0.312	0.36	-0.048
ENSG00000147548	NSD3	1.78422e-21	0.346674	6.5283e-17	0.754	0.743	0.011
ENSG00000139910	NOVA1	1.85861e-21	0.434433	6.80048e-17	0.491	0.324	0.167
ENSG00000166848	TERF2IP	1.86588e-21	0.245597	6.82705e-17	0.644	0.694	-0.05
ENSG00000151914	DST	2.24828e-21	0.496282	8.22623e-17	0.766	0.736	0.03
ENSG00000152492	CCDC50	2.28275e-21	0.326475	8.35235e-17	0.433	0.35	0.083
ENSG00000144355	DLX1	2.28576e-21	-0.130858	8.36337e-17	0.002	0.114	-0.112
ENSG00000161970	RPL26	2.30508e-21	-0.193041	8.43407e-17	1	1	0
ENSG00000101752	MIB1	2.50315e-21	0.347663	9.15878e-17	0.662	0.646	0.016
ENSG00000164305	CASP3	2.63963e-21	0.407786	9.65814e-17	0.287	0.173	0.114
ENSG00000033800	PIAS1	2.69604e-21	0.240608	9.86454e-17	0.475	0.488	-0.013
ENSG00000149633	KIAA1755	2.74396e-21	0.237798	1.00399e-16	0.125	0.004	0.121
ENSG00000164362	TERT	2.76001e-21	-0.218414	1.00986e-16	0.236	0.493	-0.257
ENSG00000160293	VAV2	2.76986e-21	0.0319139	1.01346e-16	0.16	0.264	-0.104
ENSG00000112139	MDGA1	2.89893e-21	0.287095	1.06069e-16	0.178	0.022	0.156
ENSG00000177679	SRRM3	3.02839e-21	0.295793	1.10806e-16	0.25	0.099	0.151
ENSG00000284753	EEF1AKMT4	3.74958e-21	-0.178013	1.37193e-16	0.405	0.668	-0.263
ENSG00000141314	RHBDL3	4.46277e-21	0.370678	1.63288e-16	0.319	0.147	0.172
ENSG00000127603	MACF1	4.57731e-21	0.41782	1.67479e-16	0.667	0.646	0.021
ENSG00000123213	NLN	5.10147e-21	-0.0279668	1.86658e-16	0.507	0.713	-0.206
ENSG00000072832	CRMP1	5.55284e-21	0.314242	2.03173e-16	0.489	0.458	0.031
ENSG00000198729	PPP1R14C	5.97562e-21	0.22029	2.18642e-16	0.134	0.026	0.108
ENSG00000255650	FAM222A-AS1	6.04699e-21	-0.172549	2.21253e-16	0.058	0.252	-0.194
ENSG00000173267	SNCG	6.19964e-21	0.35146	2.26839e-16	0.15	0.036	0.114
ENSG00000116898	MRPS15	6.21678e-21	-0.33385	2.27466e-16	0.685	0.899	-0.214
ENSG00000114423	CBLB	6.26132e-21	0.403791	2.29095e-16	0.379	0.289	0.09
ENSG00000144218	AFF3	6.37014e-21	0.450037	2.33077e-16	0.283	0.111	0.172
ENSG00000006625	GGCT	6.71837e-21	-0.309214	2.45819e-16	0.762	0.939	-0.177
ENSG00000148516	ZEB1	7.24997e-21	0.488791	2.65269e-16	0.736	0.701	0.035
ENSG00000105993	DNAJB6	7.26646e-21	0.31576	2.65873e-16	0.662	0.617	0.045
ENSG00000158164	TMSB15A	7.56024e-21	0.420134	2.76622e-16	0.34	0.134	0.206
ENSG00000228300	FAM174C	8.33151e-21	-0.249104	3.04841e-16	0.581	0.832	-0.251
ENSG00000127838	PNKD	8.92712e-21	-0.173885	3.26634e-16	0.465	0.72	-0.255
ENSG00000172164	SNTB1	9.16407e-21	-0.149774	3.35304e-16	0.065	0.246	-0.181
ENSG00000137563	GGH	9.36204e-21	-0.113243	3.42548e-16	0.236	0.45	-0.214
ENSG00000144645	OSBPL10	9.40575e-21	-0.170858	3.44147e-16	0.074	0.268	-0.194
ENSG00000128311	TST	9.4607e-21	-0.17173	3.46157e-16	0.22	0.452	-0.232
ENSG00000128585	MKLN1	9.71114e-21	0.380299	3.55321e-16	0.574	0.58	-0.006
ENSG00000126214	KLC1	9.80459e-21	0.2403	3.5874e-16	0.484	0.504	-0.02
ENSG00000168159	RNF187	9.88847e-21	0.0673063	3.61809e-16	0.445	0.595	-0.15
ENSG00000169019	COMMD8	1.02729e-20	-0.118032	3.75876e-16	0.195	0.405	-0.21
ENSG00000042753	AP2S1	1.14624e-20	-0.329795	4.19397e-16	0.805	0.956	-0.151
ENSG00000139219	COL2A1	1.14859e-20	-0.266531	4.20256e-16	0.164	0.415	-0.251
ENSG00000164104	HMGB2	1.18667e-20	0.00223923	4.34192e-16	0.695	0.892	-0.197
ENSG00000145220	LYAR	1.19058e-20	-0.327881	4.35621e-16	0.586	0.835	-0.249
ENSG00000100979	PLTP	1.26598e-20	-0.173453	4.6321e-16	0.322	0.577	-0.255
ENSG00000182916	TCEAL7	1.2995e-20	0.381914	4.75474e-16	0.391	0.207	0.184
ENSG00000276903	HIST1H2AL	1.32968e-20	-0.244014	4.86515e-16	0.121	0.343	-0.222
ENSG00000075651	PLD1	1.34076e-20	-0.224851	4.90569e-16	0.044	0.216	-0.172
ENSG00000048162	NOP16	1.5776e-20	-0.211386	5.7723e-16	0.528	0.786	-0.258
ENSG00000188846	RPL14	1.60507e-20	-0.212414	5.87281e-16	0.998	1	-0.002
ENSG00000005483	KMT2E	1.63248e-20	0.404146	5.9731e-16	0.657	0.634	0.023
ENSG00000117069	ST6GALNAC5	1.72479e-20	0.334188	6.31082e-16	0.259	0.079	0.18
ENSG00000180573	HIST1H2AC	1.79181e-20	-0.242109	6.55604e-16	0.144	0.37	-0.226
ENSG00000107643	MAPK8	1.81942e-20	0.374383	6.65709e-16	0.542	0.507	0.035
ENSG00000154134	ROBO3	1.85261e-20	-0.179776	6.77851e-16	0.037	0.195	-0.158
ENSG00000165215	CLDN3	2.06926e-20	-0.171546	7.57122e-16	0.04	0.216	-0.176
ENSG00000164292	RHOBTB3	2.12883e-20	0.303307	7.78919e-16	0.762	0.755	0.007
ENSG00000244754	N4BP2L2	2.17034e-20	0.11438	7.94107e-16	0.673	0.809	-0.136
ENSG00000100749	VRK1	2.24713e-20	-0.175656	8.22203e-16	0.539	0.783	-0.244
ENSG00000180828	BHLHE22	2.29419e-20	0.254964	8.39422e-16	0.162	0.02	0.142
ENSG00000183011	NAA38	2.30291e-20	-0.3304	8.4261e-16	0.727	0.92	-0.193
ENSG00000247809	NR2F2-AS1	2.30388e-20	-0.255379	8.42966e-16	0.331	0.555	-0.224
ENSG00000142192	APP	2.39419e-20	0.364633	8.76009e-16	0.819	0.847	-0.028
ENSG00000069696	DRD4	2.44078e-20	-0.163092	8.93057e-16	0.051	0.219	-0.168
ENSG00000262814	MRPL12	2.48166e-20	-0.306605	9.08014e-16	0.759	0.939	-0.18
ENSG00000038382	TRIO	2.5454e-20	0.317739	9.31338e-16	0.685	0.724	-0.039
ENSG00000074054	CLASP1	2.60948e-20	0.310599	9.54783e-16	0.549	0.536	0.013
ENSG00000117519	CNN3	2.68562e-20	0.338071	9.82642e-16	0.514	0.426	0.088
ENSG00000187821	HELT	2.72488e-20	-0.149828	9.97005e-16	0.012	0.136	-0.124
ENSG00000174938	SEZ6L2	2.76406e-20	0.256945	1.01134e-15	0.243	0.089	0.154
ENSG00000067798	NAV3	2.77439e-20	0.771167	1.01512e-15	0.218	0.054	0.164
ENSG00000118922	KLF12	2.78573e-20	0.536836	1.01927e-15	0.444	0.259	0.185
ENSG00000130770	ATP5IF1	3.03014e-20	-0.273469	1.1087e-15	0.81	0.965	-0.155
ENSG00000103460	TOX3	3.24782e-20	0.422784	1.18835e-15	0.537	0.456	0.081
ENSG00000135040	NAA35	3.54591e-20	0.187218	1.29741e-15	0.467	0.503	-0.036
ENSG00000065054	SLC9A3R2	3.59333e-20	-0.283103	1.31476e-15	0.239	0.507	-0.268
ENSG00000168393	DTYMK	3.7767e-20	-0.208722	1.38186e-15	0.599	0.84	-0.241
ENSG00000156299	TIAM1	3.80367e-20	0.453714	1.39173e-15	0.498	0.369	0.129
ENSG00000109906	ZBTB16	3.81111e-20	0.320341	1.39445e-15	0.187	0.029	0.158
ENSG00000182621	PLCB1	4.02779e-20	0.432108	1.47373e-15	0.662	0.65	0.012
ENSG00000177674	AGTRAP	4.17124e-20	-0.184776	1.52622e-15	0.359	0.62	-0.261
ENSG00000063241	ISOC2	4.25197e-20	-0.260649	1.55576e-15	0.595	0.84	-0.245
ENSG00000167414	GNG8	4.32664e-20	0.304658	1.58307e-15	0.109	0.001	0.108
ENSG00000183044	ABAT	4.39363e-20	-0.148954	1.60759e-15	0.085	0.258	-0.173
ENSG00000187079	TEAD1	4.41023e-20	0.520077	1.61366e-15	0.646	0.592	0.054
ENSG00000134744	TUT4	4.41879e-20	0.206038	1.61679e-15	0.648	0.722	-0.074
ENSG00000244274	DBNDD2	4.88489e-20	-0.273776	1.78733e-15	0.417	0.685	-0.268
ENSG00000243620	AC092957.1	5.15318e-20	-0.193063	1.8855e-15	0.405	0.605	-0.2
ENSG00000074071	MRPS34	5.2173e-20	-0.3258	1.90896e-15	0.879	0.977	-0.098
ENSG00000143653	SCCPDH	5.26505e-20	-0.167554	1.92643e-15	0.444	0.695	-0.251
ENSG00000143436	MRPL9	5.42338e-20	-0.100452	1.98436e-15	0.445	0.671	-0.226
ENSG00000105464	GRIN2D	5.48905e-20	0.298795	2.00839e-15	0.174	0.026	0.148
ENSG00000142798	HSPG2	5.53528e-20	-0.162572	2.0253e-15	0.099	0.302	-0.203
ENSG00000175130	MARCKSL1	5.58401e-20	0.465638	2.04313e-15	0.924	0.913	0.011
ENSG00000214736	TOMM6	5.60195e-20	-0.341167	2.0497e-15	0.871	0.972	-0.101
ENSG00000213015	ZNF580	6.00866e-20	-0.0823688	2.19851e-15	0.595	0.812	-0.217
ENSG00000185608	MRPL40	6.23256e-20	-0.200142	2.28043e-15	0.563	0.809	-0.246
ENSG00000197921	HES5	6.48912e-20	-0.796456	2.3743e-15	0.222	0.415	-0.193
ENSG00000130396	AFDN	6.84608e-20	0.311007	2.50491e-15	0.625	0.612	0.013
ENSG00000101224	CDC25B	7.71811e-20	-0.205283	2.82398e-15	0.146	0.375	-0.229
ENSG00000180530	NRIP1	7.79186e-20	0.439427	2.85097e-15	0.484	0.414	0.07
ENSG00000145743	FBXL17	8.76007e-20	0.2423	3.20522e-15	0.498	0.564	-0.066
ENSG00000088727	KIF9	8.80863e-20	-0.185008	3.22299e-15	0.234	0.48	-0.246
ENSG00000196935	SRGAP1	8.84587e-20	0.41253	3.23661e-15	0.4	0.249	0.151
ENSG00000139116	KIF21A	9.53602e-20	0.328668	3.48913e-15	0.678	0.659	0.019
ENSG00000214517	PPME1	9.57102e-20	0.158597	3.50194e-15	0.474	0.519	-0.045
ENSG00000179218	CALR	1.01948e-19	0.317856	3.73018e-15	0.838	0.859	-0.021
ENSG00000048544	MRPS10	1.13035e-19	0.0131188	4.13584e-15	0.445	0.603	-0.158
ENSG00000171960	PPIH	1.18539e-19	-0.218729	4.33722e-15	0.535	0.787	-0.252
ENSG00000213123	TCTEX1D2	1.20673e-19	0.00167608	4.41531e-15	0.447	0.622	-0.175
ENSG00000179915	NRXN1	1.25081e-19	0.713242	4.57658e-15	0.269	0.092	0.177
ENSG00000167281	RBFOX3	1.27638e-19	0.22458	4.67014e-15	0.18	0.034	0.146
ENSG00000136045	PWP1	1.29834e-19	-0.0442901	4.75049e-15	0.528	0.724	-0.196
ENSG00000196776	CD47	1.34312e-19	0.328959	4.91434e-15	0.433	0.379	0.054
ENSG00000165566	AMER2	1.3589e-19	0.20294	4.97209e-15	0.121	0.007	0.114
ENSG00000203814	HIST2H2BF	1.38662e-19	-0.192735	5.07349e-15	0.076	0.264	-0.188
ENSG00000109390	NDUFC1	1.48332e-19	-0.287557	5.42732e-15	0.632	0.863	-0.231
ENSG00000145996	CDKAL1	1.48549e-19	0.542601	5.43525e-15	0.757	0.783	-0.026
ENSG00000178913	TAF7	1.50824e-19	0.228463	5.51851e-15	0.516	0.504	0.012
ENSG00000065057	NTHL1	1.51828e-19	-0.247611	5.55524e-15	0.69	0.898	-0.208
ENSG00000102119	EMD	1.58103e-19	-0.00660554	5.78485e-15	0.298	0.448	-0.15
ENSG00000049541	RFC2	1.71174e-19	-0.0600364	6.26308e-15	0.419	0.62	-0.201
ENSG00000225792	AC004540.2	1.7674e-19	0.31916	6.46675e-15	0.252	0.087	0.165
ENSG00000005108	THSD7A	1.86053e-19	0.826747	6.8075e-15	0.243	0.073	0.17
ENSG00000126602	TRAP1	2.03029e-19	-0.33452	7.42863e-15	0.863	0.965	-0.102
ENSG00000122550	KLHL7	2.03227e-19	0.086943	7.43587e-15	0.298	0.37	-0.072
ENSG00000133195	SLC39A11	2.15579e-19	0.21819	7.88781e-15	0.347	0.37	-0.023
ENSG00000136490	LIMD2	2.30386e-19	0.232016	8.42958e-15	0.408	0.364	0.044
ENSG00000123975	CKS2	2.34958e-19	-0.410182	8.59688e-15	0.651	0.872	-0.221
ENSG00000120693	SMAD9	2.41516e-19	0.376139	8.83683e-15	0.423	0.383	0.04
ENSG00000110436	SLC1A2	2.48508e-19	0.35983	9.09265e-15	0.308	0.144	0.164
ENSG00000142634	EFHD2	2.49129e-19	-0.173906	9.11538e-15	0.21	0.445	-0.235
ENSG00000198818	SFT2D1	2.55243e-19	-0.18336	9.33907e-15	0.292	0.534	-0.242
ENSG00000169604	ANTXR1	2.79238e-19	0.350347	1.0217e-14	0.489	0.414	0.075
ENSG00000100075	SLC25A1	2.86432e-19	-0.278136	1.04803e-14	0.336	0.606	-0.27
ENSG00000245248	USP2-AS1	2.86687e-19	-0.179398	1.04896e-14	0.224	0.452	-0.228
ENSG00000110104	CCDC86	2.8915e-19	-0.170176	1.05797e-14	0.329	0.576	-0.247
ENSG00000230590	FTX	3.1483e-19	0.421166	1.15193e-14	0.831	0.863	-0.032
ENSG00000136928	GABBR2	3.19476e-19	0.244185	1.16893e-14	0.162	0.034	0.128
ENSG00000174437	ATP2A2	3.21295e-19	0.100485	1.17559e-14	0.461	0.577	-0.116
ENSG00000102003	SYP	3.30288e-19	0.327677	1.20849e-14	0.32	0.163	0.157
ENSG00000137154	RPS6	3.31009e-19	-0.182381	1.21113e-14	1	1	0
ENSG00000164111	ANXA5	3.32031e-19	0.0350777	1.21487e-14	0.421	0.579	-0.158
ENSG00000172301	COPRS	3.32319e-19	-0.335931	1.21592e-14	0.648	0.87	-0.222
ENSG00000137807	KIF23	3.41612e-19	-0.230592	1.24992e-14	0.232	0.481	-0.249
ENSG00000112232	KHDRBS2	3.47228e-19	0.565152	1.27047e-14	0.424	0.3	0.124
ENSG00000166326	TRIM44	3.82102e-19	0.229415	1.39807e-14	0.724	0.784	-0.06
ENSG00000148123	PLPPR1	3.98294e-19	0.29443	1.45732e-14	0.143	0.016	0.127
ENSG00000139168	ZCRB1	3.99607e-19	-0.185798	1.46212e-14	0.419	0.671	-0.252
ENSG00000168000	BSCL2	4.14436e-19	0.173303	1.51638e-14	0.558	0.647	-0.089
ENSG00000126088	UROD	4.31734e-19	-0.218326	1.57967e-14	0.308	0.566	-0.258
ENSG00000145349	CAMK2D	4.36263e-19	0.282711	1.59624e-14	0.581	0.641	-0.06
ENSG00000151136	BTBD11	4.55989e-19	-0.216604	1.66842e-14	0.192	0.383	-0.191
ENSG00000162873	KLHDC8A	4.60092e-19	0.288363	1.68343e-14	0.201	0.036	0.165
ENSG00000129038	LOXL1	4.64241e-19	0.269875	1.69861e-14	0.343	0.265	0.078
ENSG00000062582	MRPS24	4.90868e-19	-0.286242	1.79604e-14	0.886	0.977	-0.091
ENSG00000182968	SOX1	4.92962e-19	-0.12988	1.8037e-14	0.026	0.16	-0.134
ENSG00000182957	SPATA13	5.03945e-19	0.0361482	1.84389e-14	0.331	0.461	-0.13
ENSG00000101639	CEP192	5.04982e-19	0.0255027	1.84768e-14	0.405	0.564	-0.159
ENSG00000143947	RPS27A	5.13937e-19	-0.185539	1.88044e-14	0.998	1	-0.002
ENSG00000112306	RPS12	5.42406e-19	-0.187032	1.98461e-14	1	1	0
ENSG00000160551	TAOK1	5.6734e-19	0.207618	2.07584e-14	0.437	0.466	-0.029
ENSG00000138709	LARP1B	5.67759e-19	-0.0778745	2.07737e-14	0.523	0.733	-0.21
ENSG00000186468	RPS23	6.14212e-19	-0.147313	2.24734e-14	1	1	0
ENSG00000138760	SCARB2	6.27196e-19	0.363062	2.29485e-14	0.504	0.424	0.08
ENSG00000088325	TPX2	6.72665e-19	-0.164192	2.46121e-14	0.505	0.746	-0.241
ENSG00000087077	TRIP6	6.75535e-19	-0.120007	2.47171e-14	0.41	0.64	-0.23
ENSG00000065883	CDK13	6.8518e-19	0.23471	2.507e-14	0.565	0.598	-0.033
ENSG00000070761	CFAP20	7.6965e-19	-0.029903	2.81607e-14	0.298	0.458	-0.16
ENSG00000060762	MPC1	7.76226e-19	-0.198662	2.84013e-14	0.384	0.64	-0.256
ENSG00000162664	ZNF326	8.01433e-19	0.122788	2.93236e-14	0.521	0.63	-0.109
ENSG00000184432	COPB2	8.03483e-19	0.0993824	2.93986e-14	0.414	0.48	-0.066
ENSG00000180011	ZADH2	8.35434e-19	-0.072101	3.05677e-14	0.202	0.383	-0.181
ENSG00000203724	C1orf53	8.65388e-19	0.208231	3.16637e-14	0.254	0.171	0.083
ENSG00000170515	PA2G4	9.044e-19	-0.311145	3.30911e-14	0.954	0.99	-0.036
ENSG00000092964	DPYSL2	9.33681e-19	0.279069	3.41624e-14	0.482	0.449	0.033
ENSG00000160679	CHTOP	9.76697e-19	-0.0984113	3.57364e-14	0.384	0.605	-0.221
ENSG00000129654	FOXJ1	9.84258e-19	-0.0968946	3.6013e-14	0.016	0.127	-0.111
ENSG00000197238	HIST1H4J	1.01672e-18	-0.241457	3.72007e-14	0.12	0.343	-0.223
ENSG00000244879	GABPB1-AS1	1.06835e-18	0.299413	3.90899e-14	0.533	0.557	-0.024
ENSG00000153714	LURAP1L	1.07399e-18	0.229753	3.9296e-14	0.141	0.013	0.128
ENSG00000164087	POC1A	1.08657e-18	-0.0946969	3.97564e-14	0.169	0.347	-0.178
ENSG00000133639	BTG1	1.10287e-18	0.422886	4.0353e-14	0.694	0.644	0.05
ENSG00000175602	CCDC85B	1.18112e-18	-0.291881	4.32159e-14	0.87	0.978	-0.108
ENSG00000197312	DDI2	1.20239e-18	-0.0542888	4.39942e-14	0.218	0.394	-0.176
ENSG00000114023	FAM162A	1.25759e-18	-0.405151	4.60141e-14	0.664	0.88	-0.216
ENSG00000165671	NSD1	1.27529e-18	0.256246	4.66615e-14	0.63	0.66	-0.03
ENSG00000020922	MRE11	1.31375e-18	-0.0639076	4.8069e-14	0.347	0.536	-0.189
ENSG00000138795	LEF1	1.34311e-18	-0.202939	4.91429e-14	0.266	0.515	-0.249
ENSG00000113810	SMC4	1.35304e-18	-0.0910599	4.95066e-14	0.553	0.773	-0.22
ENSG00000148468	FAM171A1	1.44741e-18	0.359336	5.29594e-14	0.585	0.528	0.057
ENSG00000139350	NEDD1	1.46555e-18	0.142471	5.36231e-14	0.246	0.259	-0.013
ENSG00000196628	TCF4	1.48928e-18	0.486236	5.44912e-14	0.806	0.829	-0.023
ENSG00000124486	USP9X	1.49311e-18	0.234295	5.46313e-14	0.621	0.644	-0.023
ENSG00000099821	POLRMT	1.49752e-18	-0.109869	5.47928e-14	0.234	0.439	-0.205
ENSG00000183570	PCBP3	1.50107e-18	0.252153	5.49228e-14	0.187	0.07	0.117
ENSG00000168769	TET2	1.52714e-18	0.253865	5.58766e-14	0.308	0.23	0.078
ENSG00000147234	FRMPD3	1.53154e-18	0.19565	5.60375e-14	0.113	0.006	0.107
ENSG00000259240	MIR4713HG	1.53227e-18	0.388582	5.60643e-14	0.509	0.461	0.048
ENSG00000110200	ANAPC15	1.53396e-18	-0.0660118	5.61262e-14	0.447	0.644	-0.197
ENSG00000109519	GRPEL1	1.55107e-18	-0.101438	5.6752e-14	0.636	0.843	-0.207
ENSG00000162599	NFIA	1.56371e-18	0.694633	5.72148e-14	0.857	0.872	-0.015
ENSG00000157064	NMNAT2	1.65756e-18	0.268867	6.06483e-14	0.125	0.01	0.115
ENSG00000110492	MDK	1.6842e-18	0.421053	6.1623e-14	0.755	0.671	0.084
ENSG00000167553	TUBA1C	1.68929e-18	-0.220595	6.18093e-14	0.643	0.866	-0.223
ENSG00000203760	CENPW	1.70609e-18	-0.154401	6.24241e-14	0.489	0.727	-0.238
ENSG00000170312	CDK1	1.79802e-18	-0.0499034	6.57876e-14	0.315	0.507	-0.192
ENSG00000117616	RSRP1	1.80517e-18	0.11452	6.60495e-14	0.382	0.459	-0.077
ENSG00000089157	RPLP0	1.81097e-18	-0.179255	6.62615e-14	0.998	1	-0.002
ENSG00000132964	CDK8	1.94336e-18	0.152941	7.11054e-14	0.491	0.564	-0.073
ENSG00000138696	BMPR1B	1.98288e-18	-0.193458	7.25517e-14	0.435	0.66	-0.225
ENSG00000102804	TSC22D1	1.98924e-18	0.218148	7.27843e-14	0.581	0.637	-0.056
ENSG00000109881	CCDC34	2.01718e-18	-0.295117	7.38065e-14	0.62	0.844	-0.224
ENSG00000241468	ATP5MF	2.16359e-18	-0.2984	7.91635e-14	0.852	0.969	-0.117
ENSG00000172009	THOP1	2.18405e-18	-0.219478	7.99122e-14	0.407	0.663	-0.256
ENSG00000142765	SYTL1	2.22032e-18	-0.152865	8.12394e-14	0.083	0.27	-0.187
ENSG00000144635	DYNC1LI1	2.23407e-18	0.238132	8.17424e-14	0.613	0.609	0.004
ENSG00000111846	GCNT2	2.25522e-18	-0.0768335	8.25163e-14	0.09	0.223	-0.133
ENSG00000164176	EDIL3	2.31036e-18	0.331443	8.45336e-14	0.18	0.036	0.144
ENSG00000073536	NLE1	2.32308e-18	-0.104343	8.49993e-14	0.379	0.599	-0.22
ENSG00000116698	SMG7	2.3758e-18	0.15695	8.6928e-14	0.417	0.517	-0.1
ENSG00000162188	GNG3	2.38812e-18	0.240557	8.73788e-14	0.118	0.01	0.108
ENSG00000198846	TOX	2.46226e-18	-0.271124	9.00916e-14	0.211	0.411	-0.2
ENSG00000147955	SIGMAR1	2.56098e-18	-0.156262	9.37038e-14	0.489	0.726	-0.237
ENSG00000136448	NMT1	2.56797e-18	-0.0759555	9.39596e-14	0.354	0.552	-0.198
ENSG00000128656	CHN1	2.63685e-18	0.293304	9.64797e-14	0.537	0.513	0.024
ENSG00000214338	SOGA3	2.77622e-18	0.305103	1.01579e-13	0.415	0.345	0.07
ENSG00000010244	ZNF207	2.78714e-18	0.0971696	1.01979e-13	0.665	0.789	-0.124
ENSG00000129235	TXNDC17	2.82766e-18	-0.327251	1.03461e-13	0.801	0.95	-0.149
ENSG00000136936	XPA	2.86086e-18	-0.0501198	1.04676e-13	0.368	0.55	-0.182
ENSG00000101940	WDR13	2.89121e-18	0.0465736	1.05786e-13	0.255	0.347	-0.092
ENSG00000152894	PTPRK	3.01741e-18	0.281203	1.10404e-13	0.581	0.627	-0.046
ENSG00000171316	CHD7	3.09409e-18	0.383957	1.1321e-13	0.771	0.767	0.004
ENSG00000171988	JMJD1C	3.19913e-18	0.382869	1.17053e-13	0.838	0.841	-0.003
ENSG00000141198	TOM1L1	3.25644e-18	0.060934	1.1915e-13	0.394	0.517	-0.123
ENSG00000104267	CA2	3.26139e-18	-0.191418	1.19331e-13	0.042	0.198	-0.156
ENSG00000225930	LINC02249	3.3251e-18	0.320882	1.21662e-13	0.299	0.141	0.158
ENSG00000137831	UACA	3.36568e-18	-0.136655	1.23147e-13	0.188	0.399	-0.211
ENSG00000159685	CHCHD6	3.40886e-18	-0.288091	1.24727e-13	0.585	0.812	-0.227
ENSG00000259964	THSD4-AS1	3.48216e-18	-0.0877669	1.27409e-13	0.549	0.757	-0.208
ENSG00000155906	RMND1	3.55703e-18	0.0948206	1.30148e-13	0.31	0.37	-0.06
ENSG00000143368	SF3B4	3.6003e-18	0.0351246	1.31731e-13	0.324	0.437	-0.113
ENSG00000101846	STS	3.7688e-18	0.314275	1.37897e-13	0.382	0.321	0.061
ENSG00000198668	CALM1	3.78732e-18	0.44459	1.38574e-13	0.884	0.929	-0.045
ENSG00000079134	THOC1	3.79675e-18	0.184374	1.38919e-13	0.475	0.529	-0.054
ENSG00000115844	DLX2	3.83801e-18	-0.125707	1.40429e-13	0.007	0.115	-0.108
ENSG00000103657	HERC1	3.87117e-18	0.230463	1.41642e-13	0.484	0.5	-0.016
ENSG00000124782	RREB1	3.89424e-18	-0.149962	1.42486e-13	0.164	0.376	-0.212
ENSG00000084207	GSTP1	3.97813e-18	-0.274397	1.45556e-13	0.982	0.996	-0.014
ENSG00000090863	GLG1	4.05889e-18	0.205675	1.48511e-13	0.525	0.566	-0.041
ENSG00000111962	UST	4.06287e-18	-0.124612	1.48656e-13	0.195	0.394	-0.199
ENSG00000099954	CECR2	4.08998e-18	0.418754	1.49648e-13	0.688	0.649	0.039
ENSG00000127995	CASD1	4.19099e-18	0.313111	1.53344e-13	0.357	0.229	0.128
ENSG00000134759	ELP2	4.47025e-18	0.12276	1.63562e-13	0.539	0.646	-0.107
ENSG00000176731	RBIS	4.51939e-18	-0.204868	1.6536e-13	0.708	0.908	-0.2
ENSG00000164684	ZNF704	4.56488e-18	0.490879	1.67024e-13	0.528	0.436	0.092
ENSG00000116141	MARK1	4.58355e-18	0.322391	1.67707e-13	0.426	0.324	0.102
ENSG00000165752	STK32C	4.58874e-18	-0.249723	1.67897e-13	0.333	0.593	-0.26
ENSG00000173621	LRFN4	4.93697e-18	-0.174462	1.80639e-13	0.257	0.478	-0.221
ENSG00000166803	PCLAF	4.95413e-18	-0.182777	1.81267e-13	0.585	0.813	-0.228
ENSG00000173905	GOLIM4	5.10147e-18	0.199071	1.86658e-13	0.504	0.541	-0.037
ENSG00000121067	SPOP	5.10233e-18	0.144094	1.86689e-13	0.423	0.478	-0.055
ENSG00000018189	RUFY3	5.12857e-18	0.139755	1.87649e-13	0.507	0.608	-0.101
ENSG00000084093	REST	5.351e-18	-0.164901	1.95788e-13	0.121	0.322	-0.201
ENSG00000130449	ZSWIM6	5.5517e-18	0.40032	2.03131e-13	0.361	0.19	0.171
ENSG00000141959	PFKL	5.69921e-18	-0.0898614	2.08529e-13	0.194	0.376	-0.182
ENSG00000182054	IDH2	5.70167e-18	0.28181	2.08618e-13	0.702	0.751	-0.049
ENSG00000117592	PRDX6	5.94347e-18	-0.303804	2.17466e-13	0.886	0.983	-0.097
ENSG00000102007	PLP2	6.06608e-18	-0.175507	2.21952e-13	0.359	0.595	-0.236
ENSG00000189283	FHIT	6.19798e-18	-0.160052	2.26778e-13	0.669	0.879	-0.21
ENSG00000182768	NGRN	6.27683e-18	0.238804	2.29663e-13	0.66	0.662	-0.002
ENSG00000100852	ARHGAP5	6.31474e-18	0.162626	2.3105e-13	0.449	0.509	-0.06
ENSG00000121653	MAPK8IP1	6.32106e-18	0.0872495	2.31281e-13	0.199	0.23	-0.031
ENSG00000069482	GAL	6.48576e-18	-0.388355	2.37307e-13	0.518	0.751	-0.233
ENSG00000146278	PNRC1	6.51734e-18	0.267623	2.38463e-13	0.347	0.315	0.032
ENSG00000068697	LAPTM4A	6.74474e-18	0.256692	2.46783e-13	0.519	0.462	0.057
ENSG00000111615	KRR1	7.09296e-18	-0.0469707	2.59524e-13	0.46	0.646	-0.186
ENSG00000163320	CGGBP1	7.17348e-18	0.22862	2.6247e-13	0.495	0.501	-0.006
ENSG00000088766	CRLS1	7.47695e-18	0.0231714	2.73574e-13	0.393	0.534	-0.141
ENSG00000170370	EMX2	7.48293e-18	0.292636	2.73793e-13	0.16	0.025	0.135
ENSG00000010017	RANBP9	7.53863e-18	0.186728	2.75831e-13	0.384	0.395	-0.011
ENSG00000100116	GCAT	8.01886e-18	-0.227992	2.93402e-13	0.354	0.609	-0.255
ENSG00000166503	HDGFL3	8.04577e-18	0.240024	2.94387e-13	0.549	0.555	-0.006
ENSG00000171425	ZNF581	8.08614e-18	-0.0015241	2.95864e-13	0.477	0.655	-0.178
ENSG00000111596	CNOT2	8.13778e-18	0.214026	2.97753e-13	0.56	0.596	-0.036
ENSG00000171848	RRM2	8.60336e-18	-0.13116	3.14788e-13	0.319	0.542	-0.223
ENSG00000185697	MYBL1	8.77288e-18	0.259688	3.20991e-13	0.224	0.08	0.144
ENSG00000138750	NUP54	8.955e-18	0.0950614	3.27654e-13	0.465	0.571	-0.106
ENSG00000181029	TRAPPC5	9.1609e-18	-0.119382	3.35188e-13	0.692	0.889	-0.197
ENSG00000174871	CNIH2	9.58162e-18	0.304685	3.50582e-13	0.303	0.149	0.154
ENSG00000187555	USP7	9.77184e-18	-0.0691737	3.57542e-13	0.398	0.596	-0.198
ENSG00000113811	SELENOK	1.00782e-17	0.0577522	3.68752e-13	0.438	0.557	-0.119
ENSG00000164818	DNAAF5	1.01652e-17	-0.144504	3.71936e-13	0.301	0.528	-0.227
ENSG00000126091	ST3GAL3	1.026e-17	-0.0431714	3.75403e-13	0.282	0.449	-0.167
ENSG00000051341	POLQ	1.04724e-17	-0.175247	3.83173e-13	0.222	0.455	-0.233
ENSG00000198648	STK39	1.04917e-17	0.302792	3.8388e-13	0.53	0.499	0.031
ENSG00000091129	NRCAM	1.09484e-17	0.250889	4.00592e-13	0.403	0.472	-0.069
ENSG00000133318	RTN3	1.11596e-17	0.210262	4.08318e-13	0.694	0.755	-0.061
ENSG00000137177	KIF13A	1.13752e-17	0.314389	4.16206e-13	0.435	0.437	-0.002
ENSG00000138669	PRKG2	1.1508e-17	0.249594	4.21066e-13	0.173	0.038	0.135
ENSG00000175727	MLXIP	1.17839e-17	0.0422455	4.31162e-13	0.352	0.483	-0.131
ENSG00000188026	RILPL1	1.19081e-17	-0.0393751	4.35705e-13	0.218	0.369	-0.151
ENSG00000101158	NELFCD	1.24437e-17	0.100789	4.55303e-13	0.465	0.552	-0.087
ENSG00000128609	NDUFA5	1.25983e-17	0.119576	4.60958e-13	0.583	0.672	-0.089
ENSG00000197905	TEAD4	1.26741e-17	-0.150194	4.63732e-13	0.232	0.456	-0.224
ENSG00000250479	CHCHD10	1.42897e-17	-0.301686	5.22847e-13	0.611	0.838	-0.227
ENSG00000116117	PARD3B	1.4842e-17	-0.0444336	5.43054e-13	0.331	0.5	-0.169
ENSG00000007255	TRAPPC6A	1.49984e-17	-0.0826187	5.48777e-13	0.264	0.442	-0.178
ENSG00000122254	HS3ST2	1.50925e-17	0.223927	5.5222e-13	0.107	0.006	0.101
ENSG00000087338	GMCL1	1.52178e-17	0.0463649	5.56804e-13	0.306	0.408	-0.102
ENSG00000169760	NLGN1	1.58972e-17	0.486919	5.81663e-13	0.384	0.204	0.18
ENSG00000251555	AC096711.2	1.61307e-17	0.110646	5.90205e-13	0.331	0.423	-0.092
ENSG00000091039	OSBPL8	1.63393e-17	0.204174	5.97838e-13	0.574	0.633	-0.059
ENSG00000143153	ATP1B1	1.64741e-17	0.17693	6.02769e-13	0.319	0.335	-0.016
ENSG00000174939	ASPHD1	1.65715e-17	0.196998	6.06334e-13	0.192	0.077	0.115
ENSG00000237651	C2orf74	1.70533e-17	-0.00715343	6.23965e-13	0.157	0.254	-0.097
ENSG00000025796	SEC63	1.7118e-17	0.189638	6.26329e-13	0.593	0.644	-0.051
ENSG00000130193	THEM6	1.74556e-17	-0.14786	6.38682e-13	0.241	0.462	-0.221
ENSG00000060749	QSER1	1.74837e-17	0.210229	6.39711e-13	0.484	0.515	-0.031
ENSG00000132541	RIDA	1.75889e-17	-0.123024	6.4356e-13	0.35	0.569	-0.219
ENSG00000135097	MSI1	1.78214e-17	0.224419	6.52066e-13	0.467	0.453	0.014
ENSG00000174886	NDUFA11	1.87824e-17	-0.271244	6.8723e-13	0.882	0.974	-0.092
ENSG00000163319	MRPS18C	1.89266e-17	-0.106514	6.92505e-13	0.549	0.764	-0.215
ENSG00000070476	ZXDC	1.92615e-17	-0.0482721	7.04757e-13	0.275	0.445	-0.17
ENSG00000118816	CCNI	1.93878e-17	0.401612	7.09381e-13	0.968	0.966	0.002
ENSG00000086598	TMED2	1.97048e-17	0.113004	7.2098e-13	0.548	0.628	-0.08
ENSG00000277586	NEFL	1.98531e-17	0.123346	7.26405e-13	0.431	0.567	-0.136
ENSG00000184117	NIPSNAP1	2.01688e-17	0.128804	7.37958e-13	0.419	0.48	-0.061
ENSG00000168959	GRM5	2.10442e-17	-0.206448	7.69985e-13	0.042	0.185	-0.143
ENSG00000140365	COMMD4	2.13155e-17	-0.222495	7.79914e-13	0.507	0.751	-0.244
ENSG00000128185	DGCR6L	2.13983e-17	-0.146512	7.82943e-13	0.333	0.558	-0.225
ENSG00000168078	PBK	2.15337e-17	-0.218975	7.87897e-13	0.22	0.458	-0.238
ENSG00000167272	POP5	2.20774e-17	-0.16899	8.07791e-13	0.35	0.586	-0.236
ENSG00000146670	CDCA5	2.22113e-17	-0.170702	8.12689e-13	0.257	0.488	-0.231
ENSG00000144468	RHBDD1	2.23771e-17	0.074478	8.18756e-13	0.255	0.322	-0.067
ENSG00000115808	STRN	2.24082e-17	0.0832699	8.19894e-13	0.296	0.366	-0.07
ENSG00000119950	MXI1	2.30172e-17	0.211243	8.42175e-13	0.665	0.722	-0.057
ENSG00000164142	FAM160A1	2.4293e-17	-0.12741	8.88858e-13	0.097	0.268	-0.171
ENSG00000113141	IK	2.48394e-17	0.0316063	9.08848e-13	0.59	0.739	-0.149
ENSG00000109586	GALNT7	2.5138e-17	0.248277	9.19775e-13	0.38	0.335	0.045
ENSG00000213923	CSNK1E	2.51557e-17	0.297339	9.20422e-13	0.727	0.697	0.03
ENSG00000198743	SLC5A3	2.6149e-17	0.193305	9.56764e-13	0.292	0.309	-0.017
ENSG00000115760	BIRC6	2.64028e-17	0.287978	9.66053e-13	0.694	0.738	-0.044
ENSG00000143158	MPC2	2.68613e-17	-0.0753585	9.82827e-13	0.319	0.515	-0.196
ENSG00000254560	BBOX1-AS1	2.70385e-17	0.436786	9.89312e-13	0.343	0.188	0.155
ENSG00000112992	NNT	2.73398e-17	0.176356	1.00034e-12	0.303	0.262	0.041
ENSG00000167515	TRAPPC2L	2.76721e-17	-0.269138	1.01249e-12	0.664	0.87	-0.206
ENSG00000116209	TMEM59	2.83236e-17	0.160516	1.03633e-12	0.493	0.542	-0.049
ENSG00000113048	MRPS27	2.91656e-17	-0.148683	1.06714e-12	0.484	0.714	-0.23
ENSG00000169738	DCXR	2.97629e-17	0.542743	1.08899e-12	0.933	0.966	-0.033
ENSG00000130822	PNCK	3.00016e-17	-0.301649	1.09773e-12	0.095	0.277	-0.182
ENSG00000145715	RASA1	3.00032e-17	0.138759	1.09779e-12	0.41	0.458	-0.048
ENSG00000058453	CROCC	3.10079e-17	-0.321983	1.13455e-12	0.375	0.62	-0.245
ENSG00000074842	MYDGF	3.23825e-17	-0.186343	1.18484e-12	0.593	0.819	-0.226
ENSG00000189337	KAZN	3.25302e-17	-0.0568055	1.19025e-12	0.382	0.598	-0.216
ENSG00000130985	UBA1	3.42824e-17	-0.113971	1.25436e-12	0.463	0.682	-0.219
ENSG00000235493	LINC01967	3.50879e-17	0.413063	1.28383e-12	0.426	0.324	0.102
ENSG00000175582	RAB6A	3.52304e-17	0.182525	1.28905e-12	0.463	0.504	-0.041
ENSG00000103254	ANTKMT	3.58604e-17	-0.360461	1.3121e-12	0.611	0.828	-0.217
ENSG00000105364	MRPL4	3.58833e-17	-0.327221	1.31294e-12	0.704	0.885	-0.181
ENSG00000123472	ATPAF1	3.59817e-17	-0.178731	1.31654e-12	0.31	0.547	-0.237
ENSG00000165323	FAT3	3.70217e-17	-0.181491	1.35459e-12	0.153	0.331	-0.178
ENSG00000135540	NHSL1	3.70642e-17	0.365887	1.35614e-12	0.528	0.445	0.083
ENSG00000113272	THG1L	3.71093e-17	-0.0653493	1.35779e-12	0.394	0.589	-0.195
ENSG00000172292	CERS6	3.79911e-17	0.220438	1.39006e-12	0.623	0.704	-0.081
ENSG00000188994	ZNF292	3.81156e-17	0.355555	1.39461e-12	0.727	0.719	0.008
ENSG00000166734	CASC4	3.88233e-17	0.126582	1.42051e-12	0.389	0.462	-0.073
ENSG00000130522	JUND	4.01701e-17	0.405541	1.46978e-12	0.852	0.799	0.053
ENSG00000100345	MYH9	4.02362e-17	-0.0850309	1.4722e-12	0.146	0.324	-0.178
ENSG00000126870	WDR60	4.02363e-17	-0.102108	1.47221e-12	0.347	0.551	-0.204
ENSG00000135821	GLUL	4.13085e-17	0.23497	1.51144e-12	0.593	0.574	0.019
ENSG00000113851	CRBN	4.19413e-17	0.134358	1.53459e-12	0.37	0.427	-0.057
ENSG00000198721	ECI2	4.254e-17	-0.235391	1.5565e-12	0.43	0.682	-0.252
ENSG00000171603	CLSTN1	4.31609e-17	0.0567552	1.57921e-12	0.317	0.423	-0.106
ENSG00000204178	MACO1	4.34496e-17	0.266996	1.58978e-12	0.335	0.255	0.08
ENSG00000175600	SUGCT	4.35554e-17	-0.191136	1.59365e-12	0.308	0.548	-0.24
ENSG00000077147	TM9SF3	4.74885e-17	0.0983452	1.73756e-12	0.546	0.659	-0.113
ENSG00000104660	LEPROTL1	4.77826e-17	0.177371	1.74832e-12	0.438	0.448	-0.01
ENSG00000148300	REXO4	4.8135e-17	-0.208923	1.76121e-12	0.489	0.729	-0.24
ENSG00000225746	MEG8	4.83437e-17	-0.140198	1.76885e-12	0.021	0.137	-0.116
ENSG00000108468	CBX1	4.95738e-17	0.29797	1.81386e-12	0.738	0.713	0.025
ENSG00000139292	LGR5	5.02584e-17	-0.253141	1.83891e-12	0.194	0.391	-0.197
ENSG00000081479	LRP2	5.12108e-17	-0.213733	1.87375e-12	0.116	0.309	-0.193
ENSG00000106399	RPA3	5.13837e-17	-0.084604	1.88008e-12	0.57	0.77	-0.2
ENSG00000105655	ISYNA1	5.20658e-17	-0.318172	1.90504e-12	0.523	0.752	-0.229
ENSG00000133641	C12orf29	5.39914e-17	-0.0933385	1.97549e-12	0.239	0.426	-0.187
ENSG00000147854	UHRF2	5.46069e-17	0.0905603	1.99801e-12	0.354	0.442	-0.088
ENSG00000106462	EZH2	5.46954e-17	0.414742	2.00125e-12	0.685	0.7	-0.015
ENSG00000125877	ITPA	5.7044e-17	-0.245195	2.08718e-12	0.604	0.828	-0.224
ENSG00000148308	GTF3C5	5.78322e-17	-0.0438235	2.11602e-12	0.257	0.411	-0.154
ENSG00000237187	NR2F1-AS1	5.8018e-17	-0.131446	2.12282e-12	0.347	0.548	-0.201
ENSG00000177733	HNRNPA0	5.81964e-17	0.289464	2.12935e-12	0.801	0.822	-0.021
ENSG00000146909	NOM1	5.8487e-17	-0.126698	2.13998e-12	0.342	0.56	-0.218
ENSG00000072657	TRHDE	5.85797e-17	0.464717	2.14337e-12	0.338	0.173	0.165
ENSG00000178662	CSRNP3	5.88124e-17	0.123333	2.15189e-12	0.28	0.34	-0.06
ENSG00000106785	TRIM14	5.92925e-17	-0.118072	2.16945e-12	0.153	0.341	-0.188
ENSG00000106070	GRB10	6.01331e-17	0.188682	2.20021e-12	0.537	0.587	-0.05
ENSG00000130159	ECSIT	6.11484e-17	-0.164748	2.23736e-12	0.518	0.742	-0.224
ENSG00000086504	MRPL28	6.12589e-17	-0.264603	2.2414e-12	0.562	0.797	-0.235
ENSG00000105894	PTN	6.1893e-17	-0.23891	2.2646e-12	0.12	0.316	-0.196
ENSG00000177225	GATD1	6.28141e-17	-0.0503458	2.29831e-12	0.38	0.561	-0.181
ENSG00000172985	SH3RF3	6.38199e-17	-0.237605	2.33511e-12	0.218	0.456	-0.238
ENSG00000086666	ZFAND6	6.40169e-17	0.161946	2.34232e-12	0.382	0.413	-0.031
ENSG00000076924	XAB2	6.4453e-17	0.00275834	2.35827e-12	0.144	0.238	-0.094
ENSG00000270124	AC092127.2	6.63311e-17	-0.132498	2.42699e-12	0.011	0.117	-0.106
ENSG00000090581	GNPTG	6.93051e-17	-0.0451814	2.53581e-12	0.162	0.306	-0.144
ENSG00000004534	RBM6	7.09062e-17	0.236059	2.59439e-12	0.66	0.706	-0.046
ENSG00000183010	PYCR1	7.27141e-17	-0.136619	2.66054e-12	0.558	0.777	-0.219
ENSG00000163960	UBXN7	7.32381e-17	0.137575	2.67971e-12	0.356	0.397	-0.041
ENSG00000051108	HERPUD1	7.43579e-17	0.117087	2.72068e-12	0.342	0.417	-0.075
ENSG00000102103	PQBP1	7.70613e-17	0.128712	2.8196e-12	0.585	0.682	-0.097
ENSG00000242242	NECTIN3-AS1	7.99703e-17	0.651429	2.92603e-12	0.556	0.5	0.056
ENSG00000122482	ZNF644	8.02643e-17	0.283176	2.93679e-12	0.595	0.589	0.006
ENSG00000089199	CHGB	8.1358e-17	0.237595	2.97681e-12	0.155	0.034	0.121
ENSG00000102606	ARHGEF7	8.26378e-17	0.222352	3.02363e-12	0.377	0.375	0.002
ENSG00000074696	HACD3	8.36092e-17	0.188859	3.05918e-12	0.803	0.87	-0.067
ENSG00000030066	NUP160	8.36307e-17	0.0864885	3.05996e-12	0.526	0.653	-0.127
ENSG00000141696	P3H4	8.57008e-17	-0.0977358	3.13571e-12	0.255	0.445	-0.19
ENSG00000174547	MRPL11	8.57012e-17	-0.245198	3.13572e-12	0.713	0.904	-0.191
ENSG00000188229	TUBB4B	8.72634e-17	-0.0795759	3.19288e-12	0.702	0.892	-0.19
ENSG00000137710	RDX	8.77342e-17	0.26384	3.21011e-12	0.766	0.754	0.012
ENSG00000123600	METTL8	8.83326e-17	-0.0965854	3.232e-12	0.449	0.655	-0.206
ENSG00000163041	H3F3A	8.88036e-17	0.378318	3.24923e-12	0.998	1	-0.002
ENSG00000249859	PVT1	8.89442e-17	0.064521	3.25438e-12	0.673	0.828	-0.155
ENSG00000139514	SLC7A1	8.93402e-17	0.123734	3.26887e-12	0.523	0.617	-0.094
ENSG00000143222	UFC1	8.95431e-17	0.12012	3.27629e-12	0.695	0.802	-0.107
ENSG00000214046	SMIM7	9.10749e-17	-0.000307285	3.33234e-12	0.539	0.701	-0.162
ENSG00000105193	RPS16	9.19822e-17	-0.13286	3.36554e-12	1	1	0
ENSG00000164975	SNAPC3	9.19969e-17	0.198695	3.36608e-12	0.354	0.356	-0.002
ENSG00000154553	PDLIM3	9.46744e-17	0.302517	3.46404e-12	0.262	0.182	0.08
ENSG00000109381	ELF2	9.54298e-17	0.251607	3.49168e-12	0.512	0.532	-0.02
ENSG00000124789	NUP153	9.56654e-17	0.0737654	3.5003e-12	0.484	0.603	-0.119
ENSG00000279168	AC105052.4	9.57333e-17	0.0153694	3.50279e-12	0.308	0.443	-0.135
ENSG00000166228	PCBD1	9.62164e-17	-0.193064	3.52046e-12	0.586	0.812	-0.226
ENSG00000140943	MBTPS1	9.78205e-17	0.102877	3.57916e-12	0.371	0.462	-0.091
ENSG00000205629	LCMT1	1.00216e-16	3.50634e-05	3.66679e-12	0.412	0.563	-0.151
ENSG00000172531	PPP1CA	1.03819e-16	-0.0218791	3.79864e-12	0.553	0.723	-0.17
ENSG00000145386	CCNA2	1.03969e-16	-0.0705437	3.80411e-12	0.266	0.453	-0.187
ENSG00000181163	NPM1	1.04514e-16	-0.280711	3.82407e-12	0.998	1	-0.002
ENSG00000126351	THRA	1.05157e-16	-0.0597961	3.84759e-12	0.123	0.252	-0.129
ENSG00000237190	CDKN2AIPNL	1.06124e-16	0.0988165	3.88296e-12	0.505	0.592	-0.087
ENSG00000186193	SAPCD2	1.06304e-16	-0.155259	3.88956e-12	0.137	0.334	-0.197
ENSG00000185418	TARSL2	1.06647e-16	0.0667003	3.90212e-12	0.357	0.446	-0.089
ENSG00000144224	UBXN4	1.07087e-16	0.193375	3.9182e-12	0.706	0.774	-0.068
ENSG00000115310	RTN4	1.0727e-16	0.306897	3.92491e-12	0.868	0.848	0.02
ENSG00000196418	ZNF124	1.08321e-16	0.225545	3.96334e-12	0.393	0.373	0.02
ENSG00000120805	ARL1	1.11833e-16	-0.0427493	4.09187e-12	0.356	0.532	-0.176
ENSG00000027001	MIPEP	1.14501e-16	-0.193641	4.18947e-12	0.28	0.516	-0.236
ENSG00000275379	HIST1H3I	1.18805e-16	-0.181724	4.34696e-12	0.058	0.222	-0.164
ENSG00000284906	ARHGAP11B	1.21704e-16	-0.134388	4.45302e-12	0.266	0.472	-0.206
ENSG00000113269	RNF130	1.226e-16	0.354413	4.4858e-12	0.782	0.776	0.006
ENSG00000055609	KMT2C	1.26771e-16	0.295844	4.63843e-12	0.599	0.622	-0.023
ENSG00000139352	ASCL1	1.27585e-16	-0.255995	4.66819e-12	0.121	0.292	-0.171
ENSG00000162374	ELAVL4	1.29075e-16	0.374878	4.72273e-12	0.261	0.125	0.136
ENSG00000119421	NDUFA8	1.29556e-16	-0.199225	4.74033e-12	0.637	0.853	-0.216
ENSG00000130559	CAMSAP1	1.2962e-16	0.134139	4.74268e-12	0.359	0.413	-0.054
ENSG00000154654	NCAM2	1.32572e-16	-0.336231	4.85067e-12	0.093	0.258	-0.165
ENSG00000115561	CHMP3	1.3261e-16	0.11745	4.85205e-12	0.437	0.481	-0.044
ENSG00000181722	ZBTB20	1.32945e-16	0.422617	4.86431e-12	0.431	0.332	0.099
ENSG00000075340	ADD2	1.34098e-16	0.271763	4.9065e-12	0.408	0.309	0.099
ENSG00000185049	NELFA	1.38791e-16	0.110138	5.07824e-12	0.396	0.468	-0.072
ENSG00000170293	CMTM8	1.40607e-16	-0.189363	5.14466e-12	0.298	0.534	-0.236
ENSG00000136732	GYPC	1.40716e-16	-0.232251	5.14865e-12	0.657	0.866	-0.209
ENSG00000117118	SDHB	1.40903e-16	-0.109507	5.15548e-12	0.386	0.596	-0.21
ENSG00000111490	TBC1D30	1.41318e-16	-0.0966466	5.17069e-12	0.305	0.493	-0.188
ENSG00000090615	GOLGA3	1.42703e-16	-0.0104842	5.22136e-12	0.194	0.305	-0.111
ENSG00000168916	ZNF608	1.45043e-16	0.460013	5.30699e-12	0.393	0.239	0.154
ENSG00000133740	E2F5	1.45116e-16	-0.0022619	5.30964e-12	0.366	0.516	-0.15
ENSG00000241360	PDXP	1.47153e-16	0.118118	5.38416e-12	0.437	0.499	-0.062
ENSG00000165283	STOML2	1.48359e-16	-0.273184	5.42832e-12	0.835	0.964	-0.129
ENSG00000188486	H2AFX	1.49432e-16	-0.163493	5.46758e-12	0.442	0.659	-0.217
ENSG00000103429	BFAR	1.52155e-16	0.118656	5.5672e-12	0.572	0.649	-0.077
ENSG00000120616	EPC1	1.5442e-16	0.28643	5.65008e-12	0.526	0.509	0.017
ENSG00000084676	NCOA1	1.60652e-16	0.428402	5.8781e-12	0.493	0.408	0.085
ENSG00000204856	FAM216A	1.60843e-16	-0.0854652	5.88509e-12	0.567	0.77	-0.203
ENSG00000105877	DNAH11	1.61933e-16	-0.257339	5.92498e-12	0.143	0.357	-0.214
ENSG00000125534	PPDPF	1.62227e-16	0.164709	5.93571e-12	0.785	0.863	-0.078
ENSG00000184009	ACTG1	1.66255e-16	0.329131	6.0831e-12	0.998	1	-0.002
ENSG00000105372	RPS19	1.69033e-16	-0.155946	6.18475e-12	1	1	0
ENSG00000152253	SPC25	1.70022e-16	-0.03232	6.22095e-12	0.282	0.449	-0.167
ENSG00000141994	DUS3L	1.71333e-16	-0.106638	6.26892e-12	0.37	0.571	-0.201
ENSG00000085231	AK6	1.72515e-16	-0.131179	6.31217e-12	0.368	0.589	-0.221
ENSG00000119866	BCL11A	1.7334e-16	0.131648	6.34234e-12	0.489	0.603	-0.114
ENSG00000104522	TSTA3	1.75099e-16	-0.129416	6.40672e-12	0.449	0.668	-0.219
ENSG00000164466	SFXN1	1.753e-16	0.101925	6.41404e-12	0.53	0.63	-0.1
ENSG00000128951	DUT	1.76497e-16	-0.233013	6.45783e-12	0.769	0.936	-0.167
ENSG00000174672	BRSK2	1.7697e-16	0.233149	6.47517e-12	0.396	0.328	0.068
ENSG00000116670	MAD2L2	1.79263e-16	-0.0460924	6.55907e-12	0.35	0.525	-0.175
ENSG00000110080	ST3GAL4	1.84391e-16	-0.106104	6.74666e-12	0.248	0.443	-0.195
ENSG00000138435	CHRNA1	1.85633e-16	0.14516	6.79212e-12	0.104	0.006	0.098
ENSG00000111678	C12orf57	1.87051e-16	0.417948	6.844e-12	0.956	0.943	0.013
ENSG00000175029	CTBP2	1.92204e-16	0.322573	7.03255e-12	0.711	0.698	0.013
ENSG00000118263	KLF7	1.93378e-16	0.359112	7.07551e-12	0.324	0.204	0.12
ENSG00000130309	COLGALT1	1.96905e-16	-0.083372	7.20457e-12	0.202	0.372	-0.17
ENSG00000275221	HIST1H2AK	2.02842e-16	-0.165855	7.42178e-12	0.048	0.191	-0.143
ENSG00000160097	FNDC5	2.02882e-16	0.213787	7.42326e-12	0.195	0.061	0.134
ENSG00000180596	HIST1H2BC	2.0384e-16	-0.214225	7.45829e-12	0.092	0.281	-0.189
ENSG00000136111	TBC1D4	2.06592e-16	0.0358963	7.55899e-12	0.539	0.697	-0.158
ENSG00000228065	LINC01515	2.07336e-16	-0.2054	7.58621e-12	0.35	0.586	-0.236
ENSG00000254656	RTL1	2.10236e-16	-0.199644	7.69231e-12	0.037	0.169	-0.132
ENSG00000146243	IRAK1BP1	2.17847e-16	0.26931	7.97079e-12	0.507	0.496	0.011
ENSG00000174373	RALGAPA1	2.18711e-16	0.107309	8.00241e-12	0.431	0.519	-0.088
ENSG00000196405	EVL	2.20428e-16	0.318083	8.06526e-12	0.688	0.676	0.012
ENSG00000196233	LCOR	2.27216e-16	0.118227	8.31359e-12	0.451	0.538	-0.087
ENSG00000150760	DOCK1	2.28005e-16	-0.113491	8.34247e-12	0.252	0.45	-0.198
ENSG00000165689	ENTR1	2.3099e-16	-0.174779	8.45169e-12	0.484	0.714	-0.23
ENSG00000157456	CCNB2	2.32772e-16	0.00934476	8.51688e-12	0.414	0.569	-0.155
ENSG00000148154	UGCG	2.39457e-16	0.107651	8.7615e-12	0.301	0.375	-0.074
ENSG00000175581	MRPL48	2.39931e-16	-0.0280259	8.77883e-12	0.437	0.606	-0.169
ENSG00000170310	STX8	2.43073e-16	0.00246096	8.89381e-12	0.445	0.605	-0.16
ENSG00000108561	C1QBP	2.44828e-16	-0.272352	8.95799e-12	0.961	0.994	-0.033
ENSG00000134717	BTF3L4	2.45328e-16	0.208443	8.97629e-12	0.688	0.713	-0.025
ENSG00000167775	CD320	2.50046e-16	-0.203549	9.14895e-12	0.741	0.921	-0.18
ENSG00000162623	TYW3	2.52271e-16	-0.118822	9.23033e-12	0.44	0.65	-0.21
ENSG00000114739	ACVR2B	2.5854e-16	0.225013	9.45973e-12	0.456	0.427	0.029
ENSG00000113580	NR3C1	2.64398e-16	0.236191	9.67407e-12	0.201	0.076	0.125
ENSG00000122952	ZWINT	2.65226e-16	-0.104403	9.70435e-12	0.313	0.512	-0.199
ENSG00000134371	CDC73	2.66283e-16	0.135784	9.74304e-12	0.37	0.414	-0.044
ENSG00000213047	DENND1B	2.67523e-16	0.336366	9.78841e-12	0.306	0.149	0.157
ENSG00000100865	CINP	2.72393e-16	-0.087987	9.96661e-12	0.262	0.45	-0.188
ENSG00000149541	B3GAT3	2.76728e-16	-0.163074	1.01252e-11	0.41	0.644	-0.234
ENSG00000170779	CDCA4	2.8476e-16	-0.135469	1.04191e-11	0.387	0.603	-0.216
ENSG00000165480	SKA3	2.85514e-16	-0.169764	1.04467e-11	0.195	0.414	-0.219
ENSG00000025039	RRAGD	2.86498e-16	-0.188693	1.04827e-11	0.199	0.418	-0.219
ENSG00000087470	DNM1L	2.90241e-16	0.0923557	1.06196e-11	0.472	0.551	-0.079
ENSG00000146007	ZMAT2	2.9121e-16	0.0671028	1.06551e-11	0.447	0.554	-0.107
ENSG00000169696	ASPSCR1	2.93181e-16	-0.0539236	1.07272e-11	0.268	0.44	-0.172
ENSG00000205358	MT1H	2.95544e-16	-0.648153	1.08137e-11	0.005	0.103	-0.098
ENSG00000093217	XYLB	3.01817e-16	-0.0118061	1.10432e-11	0.349	0.507	-0.158
ENSG00000203879	GDI1	3.04291e-16	0.226039	1.11337e-11	0.359	0.286	0.073
ENSG00000092094	OSGEP	3.05447e-16	-0.0806821	1.1176e-11	0.268	0.446	-0.178
ENSG00000137804	NUSAP1	3.06198e-16	-0.0885366	1.12035e-11	0.472	0.678	-0.206
ENSG00000141127	PRPSAP2	3.07276e-16	0.0713813	1.12429e-11	0.313	0.397	-0.084
ENSG00000109083	IFT20	3.15519e-16	0.0688547	1.15445e-11	0.268	0.327	-0.059
ENSG00000145050	MANF	3.16218e-16	0.18246	1.15701e-11	0.574	0.633	-0.059
ENSG00000103024	NME3	3.18659e-16	-0.279453	1.16594e-11	0.364	0.608	-0.244
ENSG00000162490	DRAXIN	3.2229e-16	0.312988	1.17923e-11	0.151	0.031	0.12
ENSG00000166265	CYYR1	3.28996e-16	0.323572	1.20376e-11	0.417	0.277	0.14
ENSG00000160633	SAFB	3.29992e-16	0.147456	1.20741e-11	0.629	0.701	-0.072
ENSG00000114062	UBE3A	3.40774e-16	0.186479	1.24686e-11	0.657	0.719	-0.062
ENSG00000197223	C1D	3.54249e-16	0.00126621	1.29616e-11	0.342	0.477	-0.135
ENSG00000273749	CYFIP1	3.55908e-16	0.00437406	1.30223e-11	0.382	0.523	-0.141
ENSG00000119778	ATAD2B	3.56777e-16	0.202388	1.30541e-11	0.335	0.338	-0.003
ENSG00000151640	DPYSL4	3.5708e-16	0.273138	1.30652e-11	0.255	0.109	0.146
ENSG00000178149	DALRD3	3.57844e-16	-0.0861308	1.30932e-11	0.257	0.436	-0.179
ENSG00000187954	CYHR1	3.59534e-16	-0.0498422	1.3155e-11	0.34	0.51	-0.17
ENSG00000108518	PFN1	3.61014e-16	-0.24185	1.32092e-11	0.919	0.991	-0.072
ENSG00000122545	SEPTIN7	3.66629e-16	0.213415	1.34146e-11	0.806	0.863	-0.057
ENSG00000105887	MTPN	3.67512e-16	0.157562	1.34469e-11	0.676	0.759	-0.083
ENSG00000183617	MRPL54	3.71358e-16	-0.162342	1.35876e-11	0.694	0.886	-0.192
ENSG00000054116	TRAPPC3	3.719e-16	0.000420149	1.36074e-11	0.333	0.468	-0.135
ENSG00000166123	GPT2	3.74074e-16	0.0297673	1.3687e-11	0.271	0.38	-0.109
ENSG00000109534	GAR1	3.78444e-16	-0.098314	1.38469e-11	0.53	0.735	-0.205
ENSG00000214063	TSPAN4	3.78737e-16	-0.190678	1.38576e-11	0.204	0.427	-0.223
ENSG00000123684	LPGAT1	3.89628e-16	0.214075	1.42561e-11	0.35	0.334	0.016
ENSG00000104723	TUSC3	3.9413e-16	0.18859	1.44208e-11	0.599	0.649	-0.05
ENSG00000206052	DOK6	3.94834e-16	0.429523	1.44466e-11	0.305	0.191	0.114
ENSG00000079616	KIF22	3.97317e-16	-0.213869	1.45374e-11	0.463	0.698	-0.235
ENSG00000017483	SLC38A5	3.99444e-16	0.098082	1.46152e-11	0.437	0.517	-0.08
ENSG00000286797	AC009315.1	4.02822e-16	0.325404	1.47389e-11	0.361	0.29	0.071
ENSG00000077254	USP33	4.04765e-16	0.291159	1.48099e-11	0.421	0.34	0.081
ENSG00000138031	ADCY3	4.08e-16	-0.111189	1.49283e-11	0.303	0.509	-0.206
ENSG00000272886	DCP1A	4.08313e-16	0.0861497	1.49397e-11	0.393	0.478	-0.085
ENSG00000105447	GRWD1	4.12221e-16	-0.0285473	1.50828e-11	0.37	0.531	-0.161
ENSG00000125652	ALKBH7	4.14376e-16	0.102113	1.51616e-11	0.62	0.717	-0.097
ENSG00000175193	PARL	4.16254e-16	-0.0621219	1.52303e-11	0.431	0.625	-0.194
ENSG00000072506	HSD17B10	4.19576e-16	-0.121627	1.53519e-11	0.546	0.759	-0.213
ENSG00000161179	YDJC	4.22005e-16	-0.137282	1.54407e-11	0.53	0.749	-0.219
ENSG00000155313	USP25	4.24728e-16	0.0108869	1.55404e-11	0.415	0.585	-0.17
ENSG00000258315	C17orf49	4.30806e-16	0.108608	1.57628e-11	0.461	0.541	-0.08
ENSG00000002586	CD99	4.37875e-16	0.00306806	1.60214e-11	0.458	0.605	-0.147
ENSG00000114541	FRMD4B	4.38122e-16	0.220858	1.60305e-11	0.352	0.404	-0.052
ENSG00000142864	SERBP1	4.43667e-16	-0.263112	1.62333e-11	0.982	0.997	-0.015
ENSG00000120837	NFYB	4.44055e-16	0.0788659	1.62475e-11	0.345	0.433	-0.088
ENSG00000138085	ATRAID	4.4508e-16	-0.0894406	1.6285e-11	0.493	0.697	-0.204
ENSG00000106078	COBL	4.48752e-16	-0.224278	1.64194e-11	0.109	0.284	-0.175
ENSG00000179673	RPRML	4.52594e-16	-0.173648	1.656e-11	0.081	0.257	-0.176
ENSG00000012048	BRCA1	4.56343e-16	0.0111925	1.66971e-11	0.336	0.478	-0.142
ENSG00000111961	SASH1	4.64813e-16	-0.00709139	1.70071e-11	0.262	0.398	-0.136
ENSG00000115866	DARS	4.64824e-16	-0.102301	1.70074e-11	0.583	0.783	-0.2
ENSG00000120686	UFM1	4.67288e-16	0.112872	1.70976e-11	0.449	0.513	-0.064
ENSG00000137821	LRRC49	4.75845e-16	0.176257	1.74107e-11	0.268	0.243	0.025
ENSG00000224905	AP001347.1	4.76126e-16	0.16352	1.7421e-11	0.442	0.52	-0.078
ENSG00000182628	SKA2	4.77272e-16	0.156016	1.74629e-11	0.526	0.592	-0.066
ENSG00000114942	EEF1B2	4.7758e-16	-0.221245	1.74742e-11	0.996	0.999	-0.003
ENSG00000167393	PPP2R3B	4.81933e-16	-0.212906	1.76334e-11	0.371	0.609	-0.238
ENSG00000143889	HNRNPLL	4.93322e-16	0.119792	1.80502e-11	0.292	0.327	-0.035
ENSG00000126778	SIX1	4.9776e-16	0.23885	1.82125e-11	0.171	0.06	0.111
ENSG00000160193	WDR4	5.04308e-16	-0.137231	1.84521e-11	0.368	0.586	-0.218
ENSG00000151320	AKAP6	5.21852e-16	0.314867	1.90941e-11	0.229	0.178	0.051
ENSG00000071462	BUD23	5.43616e-16	-0.249576	1.98904e-11	0.581	0.808	-0.227
ENSG00000119599	DCAF4	5.43993e-16	-0.000168672	1.99042e-11	0.254	0.37	-0.116
ENSG00000072041	SLC6A15	5.64082e-16	0.228327	2.06392e-11	0.53	0.563	-0.033
ENSG00000175782	SLC35E3	5.67814e-16	-0.0130593	2.07758e-11	0.273	0.414	-0.141
ENSG00000120727	PAIP2	5.72286e-16	0.315296	2.09394e-11	0.738	0.708	0.03
ENSG00000267586	LINC00907	5.7312e-16	0.485892	2.09699e-11	0.151	0.034	0.117
ENSG00000287763	AC068279.2	5.7466e-16	-0.083301	2.10262e-11	0.273	0.458	-0.185
ENSG00000064666	CNN2	5.74898e-16	-0.115888	2.10349e-11	0.046	0.184	-0.138
ENSG00000137845	ADAM10	5.77539e-16	0.193104	2.11316e-11	0.398	0.418	-0.02
ENSG00000169020	ATP5ME	5.78026e-16	-0.290592	2.11494e-11	0.915	0.984	-0.069
ENSG00000004455	AK2	5.81077e-16	-0.158947	2.1261e-11	0.59	0.802	-0.212
ENSG00000146592	CREB5	5.93172e-16	0.4305	2.17036e-11	0.31	0.203	0.107
ENSG00000108479	GALK1	5.93663e-16	-0.125097	2.17215e-11	0.224	0.418	-0.194
ENSG00000157764	BRAF	6.05723e-16	0.245797	2.21628e-11	0.495	0.542	-0.047
ENSG00000007080	CCDC124	6.07486e-16	-0.0861743	2.22273e-11	0.616	0.808	-0.192
ENSG00000104967	NOVA2	6.08046e-16	0.176933	2.22478e-11	0.116	0.019	0.097
ENSG00000164199	ADGRV1	6.12925e-16	0.313545	2.24263e-11	0.495	0.504	-0.009
[truncated: 9,365 more rows]
